# Supplementary material for: Maternal Serum tRNA-Derived Fragments (tRFs) as Potential Candidates for Diagnosis of Fetal Congenital Heart Disease
Source: MDPI journal article supplement (doi:10.3390/jcdd10020078), 2023-02-13
Supplement: s1 [file s1]

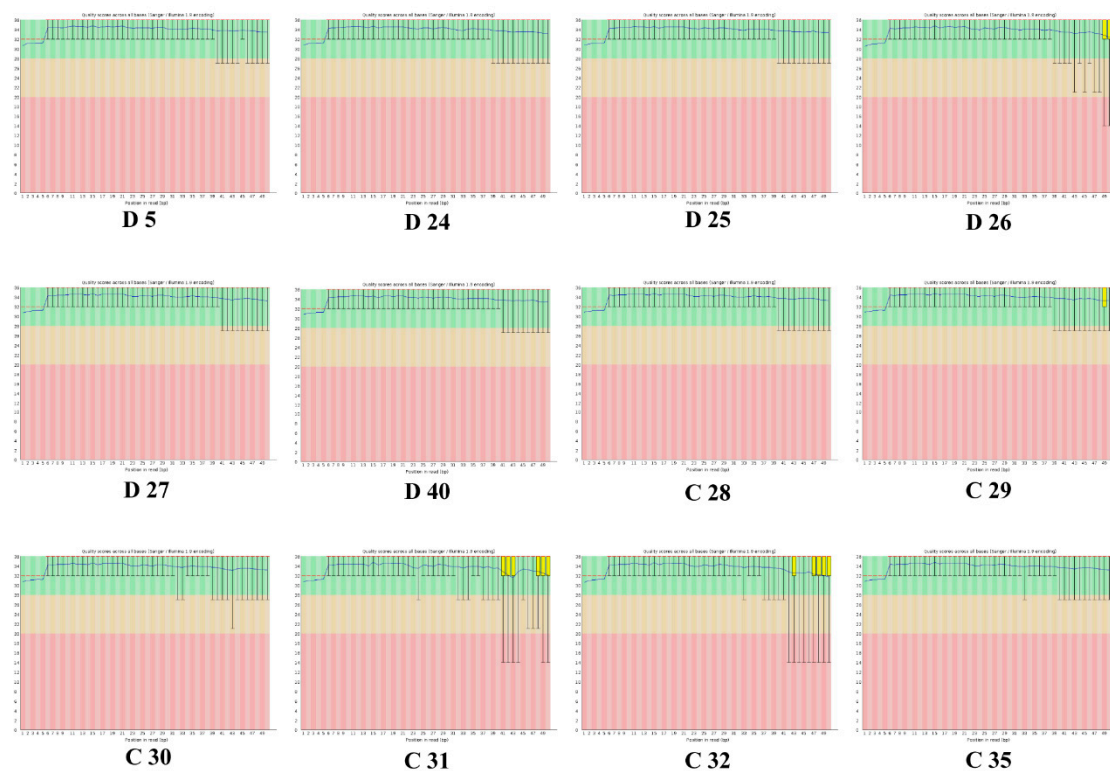

Figure S1. The quality(Q)score plot of each sample. Q30 means the incorrect base calling probability to be 0.001 or 99.9% base calling accuracy. A Q-score > 30 was considered high-quality data.
