# Supplementary material for: Maternal Serum tRNA-Derived Fragments (tRFs) as Potential Candidates for Diagnosis of Fetal Congenital Heart Disease
Source: J Cardiovasc Dev Dis. 2023 Feb 13;10(2):78. doi: 10.3390/jcdd10020078 (PMC9968204; doi:10.3390/jcdd10020078)
Supplement: Supplementary file 1 [file jcdd-10-00078-s001.zip › jcdd-2141028-supplementary.xlsx]

## Sheet: Table S1
up regulated（Disease VS Control）
tRF-55:75-Trp-CCA-2
tRF-1:23-Tyr-GTA-4-M4
tRF-58:74-Gly-GCC-1
tRF-56:76-Thr-TGT-4-M3
tRF-1:22-Val-AAC-1-M7
down regulated（Disease VS Control）
tRF-59:75-Ala-AGC-4
tiRNA-1:34-Gln-CTG-1-M3
tRF-1:24-chrM.Ser-GCT
tRF-54:75-Trp-CCA-2
tRF-60:76-Ala-AGC-11-M3
tRF-1:31-Gln-CTG-1-M3
tRF-51:69-chrM.Cys-GCA
tiRNA-1:33-iMet-CAT-1-M2
tiRNA-1:35-Leu-CAG-1-M2
tRF-53:69-chrM.Thr-TGT
tRF-59:77-Thr-AGT-1-M2
tiRNA-1:33-Gly-GCC-1
tRF-1:29-chrM.Met-CAT
tDRs_ID	tRFdb_ID	mintbase_ID	tRNA	tRFs&tiRNA Region	tRFs&tiRNA Region	tRNASeq	tRNALength	AlignmentSequence	tDR_Type	AlignmentLength
				Left	Right
tRF-55:75-Trp-CCA-2	-	tRF-21-232WMK81B	tRNA-Trp-CCA-2-1	55	75	GACCTCGTGGCGCAATGGTAGCGCGTCTGACTCCAGATCAGAAGGTTGCGTGTTCAAGTCACGTCGGGGTCACCA	75	CAAGTCACGTCGGGGTCACCA	tRF-3b	21	upregulated
tRF-1:23-Tyr-GTA-4-M4	-	tRF-23-395P4PN3X	tRNA-Tyr-GTA-4-1	1	23	CCTTCGATAGCTCAGCTGGTAGAGCGGAGGACTGTAGATCCTTAGGTCGCTGGTTCGATTCCAGCTCGAAGGACCA	76	CCTTCGATAGCTCAGCTGGTAGA	tRF-5b	23	upregulated
tRF-58:74-Gly-GCC-1	3028a	tRF-17-8SP6X52	tRNA-Gly-GCC-1-1	58	74	GCATGGGTGGTTCAGTGGTAGAATTCTCGCCTGCCACGCGGGAGGCCCGGGTTCGATTCCCGGCCCATGCACCA	74	TCCCGGCCCATGCACCA	tRF-3a	17	upregulated
tRF-56:76-Thr-TGT-4-M3	-	tRF-21-2E4V9K3RB	tRNA-Thr-TGT-4-1	56	76	GGCTCCATAGCTCAGGGGTTAGAGCACTGGTCTTGTAAACCAGGGGTCGCGAGTTCAAATCTCGCTGGGGCCTCCA	76	CAAATCTCGCTGGGGCCTCCA	tRF-3b	21	upregulated
tRF-1:22-Val-AAC-1-M7	-	tRF-22-79MP9P9NI	tRNA-Val-AAC-1-1	1	22	GTTTCCGTAGTGTAGTGGTTATCACGTTCGCCTAACACGCGAAAGGTCCCCGGTTCGAAACCGGGCGGAAACACCA	76	GTTTCCGTAGTGTAGTGGTTAT	tRF-5b	22	upregulated
tRF-59:75-Ala-AGC-4	-	tRF-17-K6PM852	tRNA-Ala-AGC-4-1	59	75	GGGGATGTAGCTCAGTGGTAGAGCGCATGCTTAGCATGCATGAGGTCCCGGGTTCGATCCCCAGCATCTCCACCA	75	CCCCAGCATCTCCACCA	tRF-3a	17	downregulated
tiRNA-1:34-Gln-CTG-1-M3	-	tRF-34-R9J89O9NF5W8E5	tRNA-Gln-CTG-1-1	1	34	GGTTCCATGGTGTAATGGTTAGCACTCTGGACTCTGAATCCAGCGATCCGAGTTCAAATCTCGGTGGAACCTCCA	75	GGTTCCATGGTGTAATGGTTAGCACTCTGGACTC	tiRNA-5	34	downregulated
tRF-1:24-chrM.Ser-GCT	-	tRF-24-5BF900BYHF	chrM.tRNA12-SerGCT	1	24	GAGAAAGCTCACAAGAACTGCTAACTCATGCCCCCATGTCTAACAACATGGCTTTCTCACCA	62	GAGAAAGCTCACAAGAACTGCTAA	tRF-5b	24	downregulated
tRF-54:75-Trp-CCA-2	-	tRF-22-808HWKS52	tRNA-Trp-CCA-2-1	54	75	GACCTCGTGGCGCAATGGTAGCGCGTCTGACTCCAGATCAGAAGGTTGCGTGTTCAAGTCACGTCGGGGTCACCA	75	TCAAGTCACGTCGGGGTCACCA	tRF-3b	22	downregulated
tRF-60:76-Ala-AGC-11-M3	-	tRF-17-PSJ9852	tRNA-Ala-AGC-11-1	60	76	GGGGAATTAGCTCAAATGGTAGAGCGCTCGCTTAGCATGCGAGAGGTAGCGGGATCGATGCCCGCATTCTCCACCA	76	GCCCGCATTCTCCACCA	tRF-3a	17	downregulated
tRF-1:31-Gln-CTG-1-M3	-	tRF-31-R9J89O9NF5W8B	tRNA-Gln-CTG-1-1	1	31	GGTTCCATGGTGTAATGGTTAGCACTCTGGACTCTGAATCCAGCGATCCGAGTTCAAATCTCGGTGGAACCTCCA	75	GGTTCCATGGTGTAATGGTTAGCACTCTGGA	tRF-5c	31	downregulated
tRF-51:69-chrM.Cys-GCA	-	tRF-19-B1XSRIJ2	chrM.tRNA19-CysGCA	51	69	AGCTCCGAGGTGATTTTCATATTGAATTGCAAATTCGAAGAAGCAGCTTCAAACCTGCCGGGGCTTCCA	69	AAACCTGCCGGGGCTTCCA	tRF-3b	19	downregulated
tiRNA-1:33-iMet-CAT-1-M2	-	tRF-33-FP18LPMBQ4NKDJ	tRNA-iMet-CAT-1-1	1	33	AGCAGAGTGGCGCAGCGGAAGCGTGCTGGGCCCATAACCCAGAGGTCGATGGATCGAAACCATCCTCTGCTACCA	75	AGCAGAGTGGCGCAGCGGAAGCGTGCTGGGCCC	tiRNA-5	33	downregulated
tiRNA-1:35-Leu-CAG-1-M2	-	tRF-35-SP5830MMUKLYM9	tRNA-Leu-CAG-1-1	1	35	GTCAGGATGGCCGAGCGGTCTAAGGCGCTGCGTTCAGGTCGCAGTCTCCCCTGGAGGCGTGGGTTCGAATCCCACTCCTGACACCA	86	GTCAGGATGGCCGAGCGGTCTAAGGCGCTGCGTTC	tiRNA-5	35	downregulated
tRF-53:69-chrM.Thr-TGT	-	tRF-17-ZZK0O52	chrM.tRNA14-ThrTGT	53	69	GTCCTTGTAGTATAAACTAATACACCAGTCTTGTAAACCGGAGACGAAAACCTTTTTCCAAGGACACCA	69	TTTTTCCAAGGACACCA	tRF-3a	17	downregulated
tRF-59:77-Thr-AGT-1-M2	-	tRF-19-DRJH71J2	tRNA-Thr-AGT-1-1	59	77	GGCGCCGTGGCTTAGTTGGTTAAAGCGCCTGTCTAGTAAACAGGAGATCCTGGGTTCGAATCCCAGCGGTGCCTCCA	77	AATCCCAGCGGTGCCTCCA	tRF-3b	19	downregulated
tiRNA-1:33-Gly-GCC-1	-	tRF-33-P4R8YP9LON4VDP	tRNA-Gly-GCC-1-1	1	33	GCATGGGTGGTTCAGTGGTAGAATTCTCGCCTGCCACGCGGGAGGCCCGGGTTCGATTCCCGGCCCATGCACCA	74	GCATGGGTGGTTCAGTGGTAGAATTCTCGCCTG	tiRNA-5	33	downregulated
tRF-1:29-chrM.Met-CAT	-	tRF-29-1OR6QOH04MI9	chrM.tRNA5-MetCAT	1	29	AGTAAGGTCAGCTAAATAAGCTATCGGGCCCATACCCCGAAAATGTTGGTTATACCCTTCCCGTACTACCA	71	AGTAAGGTCAGCTAAATAAGCTATCGGGC	tRF-5c	29	downregulated

## Sheet: Table S2
tRF_ID	tRF_Seq	Type	tRFdb_ID	MINTbase_ID	Length	AlignInfo	count												CPM
							D40	D5	D24	D25	D26	D27	C28	C29	C30	C31	C32	C35	D40	D5	D24	D25	D26	D27	C28	C29	C30	C31	C32	C35
tRF-57:75-iMet-CAT-1-M2	AAACCATCCTCTGCTACCA	tRF-3b	-	tRF-19-B1H7NIE2	19	tRNA-iMet-CAT-1-1,AGCAGAGTGGCGCAGCGGAAGCGTGCTGGGCCCATAACCCAGAGGTCGATGGATCGAAACCATCCTCTGCTACCA,iMet-CAT,56;tRNA-iMet-CAT-2-1,AGCAGAGTGGCGCAGCGGAAGCGTGCTGGGCCCATAACCCAGAGGTCGATGGATCTAAACCATCCTCTGCTACCA,iMet-CAT,56	0	0	0	0	0	1	16	0	2	1	1	0	0	0	0	0	0	6.47387	50.0656	0	5.69739	6.48841	4.37828	0
tRF-58:76-Val-AAC-5	AAACCGGGCAGAAACACCA	tRF-3b	-	-	19	tRNA-Val-AAC-5-1,GTTTCCGTAGTGTAGTGGTTATCACGTTTGCCTAACACGCGAAAGGTCCCCGGTTCGAAACCGGGCAGAAACACCA,Val-AAC,57	3	0	13	0	0	0	1	0	0	0	0	28	11.7377	0	36.2532	0	0	0	3.1291	0	0	0	0	54.7179
tRF-58:76-Val-AAC-1-M5	AAACCGGGCGGAAACACCA	tRF-3b	-	tRF-19-B1RHODE2	19	tRNA-Val-AAC-1-1,GTTTCCGTAGTGTAGTGGTTATCACGTTCGCCTAACACGCGAAAGGTCCCCGGTTCGAAACCGGGCGGAAACACCA,Val-AAC,57;tRNA-Val-AAC-2-1,GTTTCCGTAGTGTAGTGGTCATCACGTTCGCCTAACACGCGAAAGGTCCCCGGTTCGAAACCGGGCGGAAACACCA,Val-AAC,57;tRNA-Val-AAC-4-1,GTTTCCGTAGTGTAGTGGTTATCACGTTCGCCTAACACGCGAAAGGTCCGCGGTTCGAAACCGGGCGGAAACACCA,Val-AAC,57;tRNA-Val-CAC-1-1,GTTTCCGTAGTGTAGTGGTTATCACGTTCGCCTCACACGCGAAAGGTCCCCGGTTCGAAACCGGGCG…	2	16	36	14	15	16	6	75	3	4	0	76	7.82512	27.0397	100.393	56.7155	101.142	103.582	18.7746	326.906	8.54608	25.9536	0	148.52
tRF-51:69-chrM.Cys-GCA	AAACCTGCCGGGGCTTCCA	tRF-3b	-	tRF-19-B1XSRIJ2	19	chrM.tRNA19-CysGCA,AGCTCCGAGGTGATTTTCATATTGAATTGCAAATTCGAAGAAGCAGCTTCAAACCTGCCGGGGCTTCCA,Cys-GCA,50	0	0	0	0	0	0	21	17	0	0	0	0	0	0	0	0	0	0	65.711	74.0986	0	0	0	0
tRF-52:71-chrM.Pro-TGG	AAAGACTTTTTCTCTGACCA	tRF-3b	-	tRF-20-B2NZW7O6	20	chrM.tRNA15-ProTGG,CAGAGAATAGTTTAAATTAGAATCTTAGCTTTGGGTGCTAATGGTGGAGTTAAAGACTTTTTCTCTGACCA,Pro-TGG,51	27	62	125	31	0	51	271	40	39	2	0	9	105.639	104.779	348.588	125.584	0	330.168	847.985	174.35	111.099	12.9768	0	17.5879
tRF-56:75-Trp-CCA-1-M3	AAATCACGTCGGGGTCACCA	tRF-3b	-	tRF-20-BMEMR326	20	tRNA-Trp-CCA-1-1,GGCCTCGTGGCGCAACGGTAGCGCGTCTGACTCCAGATCAGAAGGTTGCGTGTTCAAATCACGTCGGGGTCACCA,Trp-CCA,55;tRNA-Trp-CCA-3-1,GACCTCGTGGCGCAACGGTAGCGCGTCTGACTCCAGATCAGAAGGTTGCGTGTTCAAATCACGTCGGGGTCACCA,Trp-CCA,55;tRNA-Trp-CCA-5-1,GACCTCGTGGCGCAACGGCAGCGCGTCTGACTCCAGATCAGAAGGTTGCGTGTTCAAATCACGTCGGGGTCACCA,Trp-CCA,55	3	4	44	0	18	0	4	19	4	1	5	0	11.7377	6.75993	122.703	0	121.37	0	12.5164	82.8161	11.3948	6.48841	21.8914	0
tRF-56:75-Pro-AGG-1-M7	AAATCCCGGACGAGCCCCCA	tRF-3b	-	tRF-20-BM32LJK6	20	tRNA-Pro-AGG-1-1,GGCTCGTTGGTCTAGGGGTATGATTCTCGCTTAGGATGCGAGAGGTCCCGGGTTCAAATCCCGGACGAGCCCCCA,Pro-AGG,55;tRNA-Pro-AGG-2-1,GGCTCGTTGGTCTAGGGGTATGATTCTCGCTTAGGGTGCGAGAGGTCCCGGGTTCAAATCCCGGACGAGCCCCCA,Pro-AGG,55;tRNA-Pro-CGG-1-1,GGCTCGTTGGTCTAGGGGTATGATTCTCGCTTCGGGTGCGAGAGGTCCCGGGTTCAAATCCCGGACGAGCCCCCA,Pro-CGG,55;tRNA-Pro-CGG-2-1,GGCTCGTTGGTCTAGGGGTATGATTCTCGCTTCGGGTGTGAGAGGTCCCGGGTTCAAATCCCGGACGAGC…	19	17	66	5	34	65	3	13	37	5	112	45	74.3387	28.7297	184.055	20.2555	229.254	420.802	9.38729	56.6636	105.402	32.442	490.368	87.9394
tRF-57:76-Thr-TGT-4-M3	AAATCTCGCTGGGGCCTCCA	tRF-3b	-	-	20	tRNA-Thr-TGT-4-1,GGCTCCATAGCTCAGGGGTTAGAGCACTGGTCTTGTAAACCAGGGGTCGCGAGTTCAAATCTCGCTGGGGCCTCCA,Thr-TGT,56;tRNA-Thr-TGT-5-1,GGCCCTATAGCTCAGGGGTTAGAGCACTGGTCTTGTAAACCAGGGGTCGCGAGTTCAAATCTCGCTGGGGCCTCCA,Thr-TGT,56;tRNA-Thr-TGT-6-1,GGCTCCATAGCTCAGGGGTTAGAGCACTGGTCTTGTAAACCAGGGTCGCGAGTTCAAATCTCGCTGGGGCCTCCA,Thr-TGT,55	2	11	21	0	0	22	1	1	3	1	28	25	7.82512	18.5898	58.5629	0	0	142.425	3.1291	4.35874	8.54608	6.48841	122.592	48.8552
tRF-56:75-Gln-CTG-1-M2	AAATCTCGGTGGAACCTCCA	tRF-3b	-	tRF-20-BMW36D46	20	tRNA-Gln-CTG-1-1,GGTTCCATGGTGTAATGGTTAGCACTCTGGACTCTGAATCCAGCGATCCGAGTTCAAATCTCGGTGGAACCTCCA,Gln-CTG,55;tRNA-Gln-CTG-5-1,GGTTCCATGGTGTAATGGTTAGCACTCTGGACTCTGAATCCGGTAATCCGAGTTCAAATCTCGGTGGAACCTCCA,Gln-CTG,55	22	16	136	15	242	58	78	56	43	146	120	55	86.0764	27.0397	379.264	60.7666	1631.75	375.485	244.07	244.09	122.494	947.308	525.394	107.481
tRF-56:75-Gln-TTG-1-M2	AAATCTCGGTGGGACCTCCA	tRF-3b	-	tRF-20-BMW3RD46	20	tRNA-Gln-TTG-1-1,GGTCCCATGGTGTAATGGTTAGCACTCTGGACTTTGAATCCAGCGATCCGAGTTCAAATCTCGGTGGGACCTCCA,Gln-TTG,55;tRNA-Gln-TTG-3-1,GGCCCCATGGTGTAATGGTTAGCACTCTGGACTTTGAATCCAGCGATCCGAGTTCAAATCTCGGTGGGACCTCCA,Gln-TTG,55	10	13	73	7	68	50	4	6	43	2	102	55	39.1256	21.9698	203.576	28.3578	458.508	323.694	12.5164	26.1525	122.494	12.9768	446.585	107.481
tRF-58:75-iMet-CAT-1-M2	AACCATCCTCTGCTACCA	tRF-3a	-	tRF-18-B689XXD2	18	tRNA-iMet-CAT-1-1,AGCAGAGTGGCGCAGCGGAAGCGTGCTGGGCCCATAACCCAGAGGTCGATGGATCGAAACCATCCTCTGCTACCA,iMet-CAT,57;tRNA-iMet-CAT-2-1,AGCAGAGTGGCGCAGCGGAAGCGTGCTGGGCCCATAACCCAGAGGTCGATGGATCTAAACCATCCTCTGCTACCA,iMet-CAT,57	0	4	1	0	0	0	23	0	0	1	0	2	0	6.75993	2.78871	0	0	0	71.9692	0	0	6.48841	0	3.90842
tRF-57:75-Thr-CGT-2-M2	AACCCCGTCCGTGCCTCCA	tRF-3b	-	-	19	tRNA-Thr-CGT-2-1,GGCGCGGTGGCCAAGTGGTAAGGCGTCGGTCTCGTAAACCGAAGATCACGGGTTCGAACCCCGTCCGTGCCTCCA,Thr-CGT,56;tRNA-Thr-CGT-4-1,GGCGCGGTGGCCAAGTGGTAAGGCGTCGGTCTCGTAAACCGAAGATCGCGGGTTCGAACCCCGTCCGTGCCTCCA,Thr-CGT,56	0	0	0	6	0	0	0	0	0	0	0	1	0	0	0	24.3067	0	0	0	0	0	0	0	1.95421
tRF-67:85-Ser-TGA-1	AACCCTGCTCGCTGCGCCA	tRF-3b	-	-	19	tRNA-Ser-TGA-1-1,GCAGCGATGGCCGAGTGGTTAAGGCGTTGGACTTGAAATCCAATGGGGTCTCCCCGCGCAGGTTCGAACCCTGCTCGCTGCGCCA,Ser-TGA,66	1	0	0	0	0	1	1	27	0	0	0	0	3.91256	0	0	0	0	6.47387	3.1291	117.686	0	0	0	0
tRF-59:76-Val-AAC-5	AACCGGGCAGAAACACCA	tRF-3a	-	-	18	tRNA-Val-AAC-5-1,GTTTCCGTAGTGTAGTGGTTATCACGTTTGCCTAACACGCGAAAGGTCCCCGGTTCGAAACCGGGCAGAAACACCA,Val-AAC,58	0	1	16	5	1	0	8	1	0	0	28	2	0	1.68998	44.6193	20.2555	6.74277	0	25.0328	4.35874	0	0	122.592	3.90842
tRF-59:76-Val-CAC-2	AACCGGGCAGAAGCACCA	tRF-3a	-	tRF-18-BS6PDFD2	18	tRNA-Val-CAC-2-1,GCTTCTGTAGTGTAGTGGTTATCACGTTCGCCTCACACGCGAAAGGTCCCCGGTTCGAAACCGGGCAGAAGCACCA,Val-CAC,58	0	1	2	0	0	0	14	1	24	2	0	2	0	1.68998	5.57742	0	0	0	43.8074	4.35874	68.3687	12.9768	0	3.90842
tRF-59:76-Val-AAC-1-M5	AACCGGGCGGAAACACCA	tRF-3a	-	tRF-18-BS68BFD2	18	tRNA-Val-AAC-1-1,GTTTCCGTAGTGTAGTGGTTATCACGTTCGCCTAACACGCGAAAGGTCCCCGGTTCGAAACCGGGCGGAAACACCA,Val-AAC,58;tRNA-Val-AAC-2-1,GTTTCCGTAGTGTAGTGGTCATCACGTTCGCCTAACACGCGAAAGGTCCCCGGTTCGAAACCGGGCGGAAACACCA,Val-AAC,58;tRNA-Val-AAC-4-1,GTTTCCGTAGTGTAGTGGTTATCACGTTCGCCTAACACGCGAAAGGTCCGCGGTTCGAAACCGGGCGGAAACACCA,Val-AAC,58;tRNA-Val-CAC-1-1,GTTTCCGTAGTGTAGTGGTTATCACGTTCGCCTCACACGCGAAAGGTCCCCGGTTCGAAACCGGGCG…	56	36	104	88	86	152	378	204	94	202	45	127	219.103	60.8394	290.026	356.498	579.878	984.029	1182.8	889.183	267.777	1310.66	197.023	248.185
tRF-24:38-chrM.Lys-TTT	AACCTTTTAAGTTAA	tRF-2	-	-	15	chrM.tRNA8-LysTTT,CACTGTAAAGCTAACTTAGCATTAACCTTTTAAGTTAAAGATTAAGAGAACCAACACCTCTTTACAGTGACCA,Lys-TTT,23	0	0	0	0	0	0	41	14	0	0	0	0	0	0	0	0	0	0	128.293	61.0224	0	0	0	0
tRF-54:72-chrM.Val-TAC	AACTTGACCGCTCTGACCA	tRF-3b	-	tRF-19-BZOS4YE2	19	chrM.tRNA2-ValTAC,CAGAGTGTAGCTTAACACAAAGCACCCAACTTACACTTAGGAGATTTCAACTTAACTTGACCGCTCTGACCA,Val-TAC,53	31	7	42	40	0	73	81	62	46	55	1	9	121.289	11.8299	117.126	162.044	0	472.593	253.457	270.242	131.04	356.862	4.37828	17.5879
tRF-53:71-chrM.Pro-TGG	AAGACTTTTTCTCTGACCA	tRF-3b	-	tRF-19-DDZZ4YE2	19	chrM.tRNA15-ProTGG,CAGAGAATAGTTTAAATTAGAATCTTAGCTTTGGGTGCTAATGGTGGAGTTAAAGACTTTTTCTCTGACCA,Pro-TGG,52	127	21	154	35	0	109	246	114	161	27	3	1	496.895	35.4896	429.461	141.789	0	705.652	769.758	496.897	458.64	175.187	13.1349	1.95421
tRF-+1:T14-Leu-TAA-3	AAGAGGAGTTGTTT	tRF-1	-	-	14	pre_tRNA-Leu-TAA-3-1,TACCCGAGTTGCTTTAAAATAAAACATTGTTTTATCAGTTACCAGAATGGCCGAGTGGTTAAGGCGTTGGACTTAAGATCCAATGGATTCATATCCGCGTGGGTTCGAACCCCACTTCTGGTAAAGAGGAGTTGTTTTTCCTGGCAAAAACCTTTTTTCCTAA,Leu-TAA,123	8	0	1	1	0	0	0	0	20	0	0	23	31.3005	0	2.78871	4.05111	0	0	0	0	56.9739	0	0	44.9468
tRF-+1:T15-Leu-TAA-3	AAGAGGAGTTGTTTT	tRF-1	1032	-	15	pre_tRNA-Leu-TAA-3-1,TACCCGAGTTGCTTTAAAATAAAACATTGTTTTATCAGTTACCAGAATGGCCGAGTGGTTAAGGCGTTGGACTTAAGATCCAATGGATTCATATCCGCGTGGGTTCGAACCCCACTTCTGGTAAAGAGGAGTTGTTTTTCCTGGCAAAAACCTTTTTTCCTAA,Leu-TAA,123	0	0	0	1	0	0	0	0	13	0	0	0	0	0	0	4.05111	0	0	0	0	37.033	0	0	0
tRF-57:76-Val-TAC-3	AAGCCCCAGTGGAACCACCA	tRF-3b	-	-	20	tRNA-Val-TAC-3-1,GGTTCCATAGTGTAGTGGTTATCACATCTGCTTTACACGCAGAAGGTCCTGGGTTCAAGCCCCAGTGGAACCACCA,Val-TAC,56	0	0	0	0	0	0	0	0	0	4	0	1	0	0	0	0	0	0	0	0	0	25.9536	0	1.95421
tRF-1:23-chrM.Ala-TGC	AAGGGCTTAGCTTAATTAAAGTG	tRF-5b	-	-	23	chrM.tRNA21-AlaTGC,AAGGGCTTAGCTTAATTAAAGTGGCTGATTTGCGTTCAGTTGATGCAGAGTGGGGTTTTGCAGTCCTTACCA,Ala-TGC,0	1	0	0	0	0	0	31	0	0	0	0	0	3.91256	0	0	0	0	0	97.002	0	0	0	0	0
tRF-1:24-chrM.Ala-TGC	AAGGGCTTAGCTTAATTAAAGTGG	tRF-5b	-	-	24	chrM.tRNA21-AlaTGC,AAGGGCTTAGCTTAATTAAAGTGGCTGATTTGCGTTCAGTTGATGCAGAGTGGGGTTTTGCAGTCCTTACCA,Ala-TGC,0	0	0	0	0	0	0	0	0	0	16	0	0	0	0	0	0	0	0	0	0	0	103.815	0	0
tRF-56:75-Trp-CCA-2	AAGTCACGTCGGGGTCACCA	tRF-3b	-	tRF-20-DMEMR326	20	tRNA-Trp-CCA-2-1,GACCTCGTGGCGCAATGGTAGCGCGTCTGACTCCAGATCAGAAGGTTGCGTGTTCAAGTCACGTCGGGGTCACCA,Trp-CCA,55	3	0	0	5	26	39	18	3	2	2	0	0	11.7377	0	0	20.2555	175.312	252.481	56.3237	13.0762	5.69739	12.9768	0	0
tRF-56:75-Gln-CTG-2	AAGTCTCGGTGGAACCTCCA	tRF-3b	-	-	20	tRNA-Gln-CTG-2-1,GGTTCCATGGTGTAATGGTTAGCACTCTGGACTCTGAATCCAGCGATCCGAGTTCAAGTCTCGGTGGAACCTCCA,Gln-CTG,55	0	0	2	0	56	0	0	4	7	9	4	1	0	0	5.57742	0	377.595	0	0	17.435	19.9409	58.3957	17.5131	1.95421
tRF-+1:T16-Val-CAC-1	AAGTGGTTCCCGTTTT	tRF-1	-	-	16	pre_tRNA-Val-CAC-1-1,GACTTTTCAGAGTCATTTGTGGAAAACCTGCCACCGCCTGGTTTCCGTAGTGTAGTGGTTATCACGTTCGCCTCACACGCGAAAGGTCCCCGGTTCGAAACCGGGCGGAAACAAAGTGGTTCCCGTTTTTGTTTTTTTCCTTCCCCATATCCT,Val-CAC,113	0	0	22	0	0	0	18	0	0	0	0	0	0	0	61.3516	0	0	0	56.3237	0	0	0	0	0
tRF-54:71-chrM.Trp-TCA	AATACTTAATTTCTGCCA	tRF-3a	-	tRF-18-D5YEYYD2	18	chrM.tRNA6-TrpTCA,AGAAATTTAGGTTAAATACAGACCAAGAGCCTTCAAAGCCCTCAGTAAGTTGCAATACTTAATTTCTGCCA,Trp-TCA,53	2	6	16	0	0	0	0	0	0	0	0	0	7.82512	10.1399	44.6193	0	0	0	0	0	0	0	0	0
tRF-57:75-Trp-CCA-1-M4	AATCACGTCGGGGTCACCA	tRF-3b	-	tRF-19-D6MSRME2	19	tRNA-Trp-CCA-1-1,GGCCTCGTGGCGCAACGGTAGCGCGTCTGACTCCAGATCAGAAGGTTGCGTGTTCAAATCACGTCGGGGTCACCA,Trp-CCA,56;tRNA-Trp-CCA-3-1,GACCTCGTGGCGCAACGGTAGCGCGTCTGACTCCAGATCAGAAGGTTGCGTGTTCAAATCACGTCGGGGTCACCA,Trp-CCA,56;tRNA-Trp-CCA-4-1,GACCTCGTGGCGCAACGGTAGCGCGTCTGACTCCAGATCAGAAGGCTGCGTGTTCGAATCACGTCGGGGTCACCA,Trp-CCA,56;tRNA-Trp-CCA-5-1,GACCTCGTGGCGCAACGGCAGCGCGTCTGACTCCAGATCAGAAGGTTGCGTGTTCAAATCACGTCGGGGT…	9	25	69	26	27	59	4	5	13	4	73	20	35.2131	42.2496	192.421	105.329	182.055	381.959	12.5164	21.7937	37.033	25.9536	319.615	39.0842
tRF-67:85-Leu-AAG-1-M6	AATCCCACCGCTGCCACCA	tRF-3b	-	-	19	tRNA-Leu-AAG-1-1,GGTAGCGTGGCCGAGCGGTCTAAGGCGCTGGATTAAGGCTCCAGTCTCTTCGGAGGCGTGGGTTCGAATCCCACCGCTGCCACCA,Leu-AAG,66;tRNA-Leu-AAG-2-1,GGTAGCGTGGCCGAGCGGTCTAAGGCGCTGGATTAAGGCTCCAGTCTCTTCGGGGGCGTGGGTTCGAATCCCACCGCTGCCACCA,Leu-AAG,66;tRNA-Leu-AAG-3-1,GGTAGCGTGGCCGAGCGGTCTAAGGCGCTGGATTAAGGCTCCAGTCTCTTCGGGGGCGTGGGTTCAAATCCCACCGCTGCCACCA,Leu-AAG,66;tRNA-Leu-AAG-4-1,GGTAGCGTGGCCGAGTGGTCTAAGACGCTGGATTAAGGCT…	8	0	17	0	31	7	0	4	0	0	27	0	31.3005	0	47.408	0	209.026	45.3171	0	17.435	0	0	118.214	0
tRF-68:86-Leu-CAG-1	AATCCCACTCCTGACACCA	tRF-3b	-	tRF-19-DR29NDE2	19	tRNA-Leu-CAG-1-1,GTCAGGATGGCCGAGCGGTCTAAGGCGCTGCGTTCAGGTCGCAGTCTCCCCTGGAGGCGTGGGTTCGAATCCCACTCCTGACACCA,Leu-CAG,67	0	5	14	0	1	0	1	20	14	2	0	1	0	8.44991	39.0419	0	6.74277	0	3.1291	87.1748	39.8817	12.9768	0	1.95421
tRF-68:86-Leu-CAA-1-M5	AATCCCACTTCTGACACCA	tRF-3b	-	tRF-19-DR2ZNDE2	19	tRNA-Leu-CAA-1-1,GTCAGGATGGCCGAGTGGTCTAAGGCGCCAGACTCAAGTTCTGGTCTCCAATGGAGGCGTGGGTTCGAATCCCACTTCTGACACCA,Leu-CAA,67;tRNA-Leu-CAA-2-1,GTCAGGATGGCCGAGTGGTCTAAGGCGCCAGACTCAAGTTCTGGTCTCCGTATGGAGGCGTGGGTTCGAATCCCACTTCTGACACCA,Leu-CAA,68;tRNA-Leu-CAA-3-1,GTCAGGATGGCCGAGTGGTCTAAGGCGCCAGACTCAAGTTCTGGTCTCCGCATGGAGGCGTGGGTTCGAATCCCACTTCTGACACCA,Leu-CAA,68;tRNA-Leu-CAA-4-1,GTCAGGATGGCCGAGTGGTCTAAGGCGCCAGACTC…	4	10	56	0	41	14	0	3	4	45	90	3	15.6502	16.8998	156.168	0	276.454	90.6342	0	13.0762	11.3948	291.978	394.046	5.86263
tRF-59:77-Thr-AGT-2-M3	AATCCCAGCGGGGCCTCCA	tRF-3b	-	-	19	tRNA-Thr-AGT-2-1,GGCTCCGTGGCTTAGCTGGTTAAAGCGCCTGTCTAGTAAACAGGAGATCCTGGGTTCGAATCCCAGCGGGGCCTCCA,Thr-AGT,58;tRNA-Thr-AGT-6-1,GGCCCTGTGGCTTAGCTGGTCAAAGCGCCTGTCTAGTAAACAGGAGATCCTGGGTTCGAATCCCAGCGGGGCCTCCA,Thr-AGT,58;tRNA-Thr-CGT-3-1,GGCTCTGTGGCTTAGTTGGCTAAAGCGCCTGTCTCGTAAACAGGAGATCCTGGGTTCGAATCCCAGCGGGGCCTCCA,Thr-CGT,58	0	5	0	0	0	0	0	0	14	0	0	0	0	8.44991	0	0	0	0	0	0	39.8817	0	0	0
tRF-59:77-Thr-AGT-1-M2	AATCCCAGCGGTGCCTCCA	tRF-3b	-	tRF-19-DRJH71J2	19	tRNA-Thr-AGT-1-1,GGCGCCGTGGCTTAGTTGGTTAAAGCGCCTGTCTAGTAAACAGGAGATCCTGGGTTCGAATCCCAGCGGTGCCTCCA,Thr-AGT,58;tRNA-Thr-AGT-5-1,GGCGCCGTGGCTTAGCTGGTTAAAGCGCCTGTCTAGTAAACAGGAGATCCTGGGTTCGAATCCCAGCGGTGCCTCCA,Thr-AGT,58	0	0	0	3	0	0	56	0	0	16	0	0	0	0	0	12.1533	0	0	175.229	0	0	103.815	0	0
tRF-56:75-Ala-AGC-2-M2	AATCCCCGGCACCTCCACCA	tRF-3b	-	tRF-20-DR3J0926	20	tRNA-Ala-AGC-2-1,GGGGGTGTAGCTCAGTGGTAGAGCGCGTGCTTAGCATGCACGAGGCCCCGGGTTCAATCCCCGGCACCTCCACCA,Ala-AGC,55;tRNA-Ala-AGC-3-1,GGGGGTGTAGCTCAGTGGTAGAGCGCGTGCTTAGCATGTACGAGGTCCCGGGTTCAATCCCCGGCACCTCCACCA,Ala-AGC,55	1	5	0	0	0	0	1	0	0	0	1	16	3.91256	8.44991	0	0	0	0	3.1291	0	0	0	4.37828	31.2673
tRF-57:73-Pro-AGG-1-M7-16:C>A	AATCCCGGACGAGCCCA	tRF-3a	-	-	17	tRNA-Pro-AGG-1-1,GGCTCGTTGGTCTAGGGGTATGATTCTCGCTTAGGATGCGAGAGGTCCCGGGTTCAAATCCCGGACGAGCCCCCA,Pro-AGG,56;tRNA-Pro-AGG-2-1,GGCTCGTTGGTCTAGGGGTATGATTCTCGCTTAGGGTGCGAGAGGTCCCGGGTTCAAATCCCGGACGAGCCCCCA,Pro-AGG,56;tRNA-Pro-CGG-1-1,GGCTCGTTGGTCTAGGGGTATGATTCTCGCTTCGGGTGCGAGAGGTCCCGGGTTCAAATCCCGGACGAGCCCCCA,Pro-CGG,56;tRNA-Pro-CGG-2-1,GGCTCGTTGGTCTAGGGGTATGATTCTCGCTTCGGGTGTGAGAGGTCCCGGGTTCAAATCCCGGACGAGC…	0	0	0	0	0	5	2	18	0	2	1	0	0	0	0	0	0	32.3694	6.25819	78.4574	0	12.9768	4.37828	0
tRF-57:74-Pro-AGG-1-M7-17:C>A	AATCCCGGACGAGCCCCA	tRF-3a	-	-	18	tRNA-Pro-AGG-1-1,GGCTCGTTGGTCTAGGGGTATGATTCTCGCTTAGGATGCGAGAGGTCCCGGGTTCAAATCCCGGACGAGCCCCCA,Pro-AGG,56;tRNA-Pro-AGG-2-1,GGCTCGTTGGTCTAGGGGTATGATTCTCGCTTAGGGTGCGAGAGGTCCCGGGTTCAAATCCCGGACGAGCCCCCA,Pro-AGG,56;tRNA-Pro-CGG-1-1,GGCTCGTTGGTCTAGGGGTATGATTCTCGCTTCGGGTGCGAGAGGTCCCGGGTTCAAATCCCGGACGAGCCCCCA,Pro-CGG,56;tRNA-Pro-CGG-2-1,GGCTCGTTGGTCTAGGGGTATGATTCTCGCTTCGGGTGTGAGAGGTCCCGGGTTCAAATCCCGGACGAGC…	4	0	0	4	4	2	0	1	0	1	0	0	15.6502	0	0	16.2044	26.9711	12.9477	0	4.35874	0	6.48841	0	0
tRF-57:75-Pro-AGG-1-M7	AATCCCGGACGAGCCCCCA	tRF-3b	-	tRF-19-DRMD5112	19	tRNA-Pro-AGG-1-1,GGCTCGTTGGTCTAGGGGTATGATTCTCGCTTAGGATGCGAGAGGTCCCGGGTTCAAATCCCGGACGAGCCCCCA,Pro-AGG,56;tRNA-Pro-AGG-2-1,GGCTCGTTGGTCTAGGGGTATGATTCTCGCTTAGGGTGCGAGAGGTCCCGGGTTCAAATCCCGGACGAGCCCCCA,Pro-AGG,56;tRNA-Pro-CGG-1-1,GGCTCGTTGGTCTAGGGGTATGATTCTCGCTTCGGGTGCGAGAGGTCCCGGGTTCAAATCCCGGACGAGCCCCCA,Pro-CGG,56;tRNA-Pro-CGG-2-1,GGCTCGTTGGTCTAGGGGTATGATTCTCGCTTCGGGTGTGAGAGGTCCCGGGTTCAAATCCCGGACGAGC…	18	7	50	21	33	49	3	36	22	132	29	67	70.4261	11.8299	139.435	85.0733	222.511	317.22	9.38729	156.915	62.6713	856.47	126.97	130.932
tRF-56:75-Ala-AGC-7	AATCCCTGGCACCTCCACCA	tRF-3b	-	-	20	tRNA-Ala-AGC-7-1,GGGGGTGTAGCTCAGTGGTAGAGCGCGTGCTTAGCATGCACGAGGCCCCGGGTTCAATCCCTGGCACCTCCACCA,Ala-AGC,55	0	0	0	0	0	0	0	0	0	0	0	16	0	0	0	0	0	0	0	0	0	0	0	31.2673
tRF-57:75-His-GTG-1-M2	AATCCGAGTCACGGCACCA	tRF-3b	-	-	19	tRNA-His-GTG-1-1,GCCGTGATCGTATAGTGGTTAGTACTCTGCGTTGTGGCCGCAGCAACCTCGGTTCGAATCCGAGTCACGGCACCA,His-GTG,56;tRNA-His-GTG-2-1,GCCATGATCGTATAGTGGTTAGTACTCTGCGCTGTGGCCGCAGCAACCTCGGTTCGAATCCGAGTCACGGCACCA,His-GTG,56	7	0	0	0	0	1	0	0	0	0	51	0	27.3879	0	0	0	0	6.47387	0	0	0	0	223.292	0
tRF-58:76-Tyr-GTA-1-M2	AATCCGGCTCGAAGGACCA	tRF-3b	-	tRF-19-DR69OKE2	19	tRNA-Tyr-GTA-1-1,CCTTCGATAGCTCAGTTGGTAGAGCGGAGGACTGTAGATCCTTAGGTCGCTGGTTCGAATCCGGCTCGAAGGACCA,Tyr-GTA,57;tRNA-Tyr-GTA-8-1,CTTTCGATAGCTCAGTTGGTAGAGCGGAGGACTGTAGATCCTTAGGTCGCTGGTTCGAATCCGGCTCGAAGGACCA,Tyr-GTA,57	7	0	13	4	0	2	2	3	6	6	4	2	27.3879	0	36.2532	16.2044	0	12.9477	6.25819	13.0762	17.0922	38.9305	17.5131	3.90842
tRF-58:76-Tyr-GTA-3-M2	AATCCGGCTCGGAGGACCA	tRF-3b	-	tRF-19-DR696KE2	19	tRNA-Tyr-GTA-3-1,CCTTCGATAGCTCAGTTGGTAGAGCGGAGGACTGTAGATCCTTAGGTCGCTGGTTCGAATCCGGCTCGGAGGACCA,Tyr-GTA,57;tRNA-Tyr-GTA-6-1,CCTTCGATAGCTCAGCTGGTAGAGCGGAGGACTGTAGATCCTTAGGTCGCTGGTTCGAATCCGGCTCGGAGGACCA,Tyr-GTA,57	0	0	2	0	0	0	0	0	8	2	0	1	0	0	5.57742	0	0	0	0	0	22.7896	12.9768	0	1.95421
tRF-67:85-Ser-AGA-1-M6	AATCCTGCCGACTACGCCA	tRF-3b	-	tRF-19-DRXSE5I2	19	tRNA-Ser-AGA-1-1,GTAGTCGTGGCCGAGTGGTTAAGGCGATGGACTAGAAATCCATTGGGGTTTCCCCGCGCAGGTTCGAATCCTGCCGACTACGCCA,Ser-AGA,66;tRNA-Ser-AGA-2-1,GTAGTCGTGGCCGAGTGGTTAAGGCGATGGACTAGAAATCCATTGGGGTCTCCCCGCGCAGGTTCGAATCCTGCCGACTACGCCA,Ser-AGA,66;tRNA-Ser-AGA-3-1,GTAGTCGTGGCCGAGTGGTTAAGGCGATGGACTAGAAATCCATTGGGGTTTCCCCACGCAGGTTCGAATCCTGCCGACTACGCCA,Ser-AGA,66;tRNA-Ser-AGA-4-1,GTAGTCGTGGCCGAGTGGTTAAGGTGATGGACTAGAAACC…	1	3	0	0	0	0	0	0	21	0	69	0	3.91256	5.06995	0	0	0	0	0	0	59.8226	0	302.102	0
tRF-67:85-Ser-CGA-4	AATCCTGTTCGTGACGCCA	tRF-3b	-	-	19	tRNA-Ser-CGA-4-1,GTCACGGTGGCCGAGTGGTTAAGGCGTTGGACTCGAAATCCAATGGGGTTTCCCCGCACAGGTTCGAATCCTGTTCGTGACGCCA,Ser-CGA,66	0	0	0	14	0	0	0	0	0	0	0	0	0	0	0	56.7155	0	0	0	0	0	0	0	0
tRF-58:76-Thr-TGT-4-M3	AATCTCGCTGGGGCCTCCA	tRF-3b	-	-	19	tRNA-Thr-TGT-4-1,GGCTCCATAGCTCAGGGGTTAGAGCACTGGTCTTGTAAACCAGGGGTCGCGAGTTCAAATCTCGCTGGGGCCTCCA,Thr-TGT,57;tRNA-Thr-TGT-5-1,GGCCCTATAGCTCAGGGGTTAGAGCACTGGTCTTGTAAACCAGGGGTCGCGAGTTCAAATCTCGCTGGGGCCTCCA,Thr-TGT,57;tRNA-Thr-TGT-6-1,GGCTCCATAGCTCAGGGGTTAGAGCACTGGTCTTGTAAACCAGGGTCGCGAGTTCAAATCTCGCTGGGGCCTCCA,Thr-TGT,56	4	7	18	15	7	12	1	2	1	1	33	8	15.6502	11.8299	50.1967	60.7666	47.1994	77.6865	3.1291	8.71748	2.84869	6.48841	144.483	15.6337
tRF-57:75-Gln-CTG-1-M2	AATCTCGGTGGAACCTCCA	tRF-3b	-	tRF-19-D7M4O1J2	19	tRNA-Gln-CTG-1-1,GGTTCCATGGTGTAATGGTTAGCACTCTGGACTCTGAATCCAGCGATCCGAGTTCAAATCTCGGTGGAACCTCCA,Gln-CTG,56;tRNA-Gln-CTG-5-1,GGTTCCATGGTGTAATGGTTAGCACTCTGGACTCTGAATCCGGTAATCCGAGTTCAAATCTCGGTGGAACCTCCA,Gln-CTG,56	52	50	250	101	56	82	144	167	81	87	337	154	203.453	84.4991	697.177	409.162	377.595	530.858	450.59	727.91	230.744	564.492	1475.48	300.948
tRF-57:75-Gln-CTG-6	AATCTCGGTGGGACCCCCA	tRF-3b	-	-	19	tRNA-Gln-CTG-6-1,GGCCCCATGGTGTAATGGTCAGCACTCTGGACTCTGAATCCAGCGATCCGAGTTCAAATCTCGGTGGGACCCCCA,Gln-CTG,56	4	0	8	0	0	0	1	1	0	0	0	0	15.6502	0	22.3097	0	0	0	3.1291	4.35874	0	0	0	0
tRF-57:75-Gln-TTG-1-M3	AATCTCGGTGGGACCTCCA	tRF-3b	-	tRF-19-D7M461J2	19	tRNA-Gln-TTG-1-1,GGTCCCATGGTGTAATGGTTAGCACTCTGGACTTTGAATCCAGCGATCCGAGTTCAAATCTCGGTGGGACCTCCA,Gln-TTG,56;tRNA-Gln-TTG-2-1,GGTCCCATGGTGTAATGGTTAGCACTCTGGACTTTGAATCCAGCAATCCGAGTTCGAATCTCGGTGGGACCTCCA,Gln-TTG,56;tRNA-Gln-TTG-3-1,GGCCCCATGGTGTAATGGTTAGCACTCTGGACTTTGAATCCAGCGATCCGAGTTCAAATCTCGGTGGGACCTCCA,Gln-TTG,56	18	38	60	48	72	75	20	150	36	6	14	27	70.4261	64.2193	167.322	194.453	485.479	485.541	62.5819	653.811	102.553	38.9305	61.296	52.7636
tRF-59:78-chrM.Leu-TAA	AATTCCTCTTCTTAACACCA	tRF-3b	-	-	20	chrM.tRNA3-LeuTAA,GTTAAGATGGCAGAGCCCGGTAATCGCATAAAACTTAAAACTTTACAGTCAGAGGTTCAATTCCTCTTCTTAACACCA,Leu-TAA,58	0	0	0	0	0	0	10	4	5	0	2	1	0	0	0	0	0	0	31.291	17.435	14.2435	0	8.75657	1.95421
tRF-57:76-Thr-TGT-3	AATTCTCGCTGGGGCCTCCA	tRF-3b	-	-	20	tRNA-Thr-TGT-3-1,GGCTCCATAGCTCAGGGGTTAGAGCGCTGGTCTTGTAAACCAGGGGTCGCGAGTTCAATTCTCGCTGGGGCCTCCA,Thr-TGT,56	0	0	0	6	0	0	0	0	1	0	1	1	0	0	0	24.3067	0	0	0	0	2.84869	0	4.37828	1.95421
tRF-1:15-Leu-TAA-3	ACCAGAATGGCCGAG	tRF-5a	-	-	15	tRNA-Leu-TAA-3-1,ACCAGAATGGCCGAGTGGTTAAGGCGTTGGACTTAAGATCCAATGGATTCATATCCGCGTGGGTTCGAACCCCACTTCTGGTACCA,Leu-TAA,0	0	0	0	0	0	14	0	0	21	0	0	0	0	0	0	0	0	90.6342	0	0	59.8226	0	0	0
tRF-1:14-Leu-TAA-1	ACCAGGATGGCCGA	tRF-5a	-	-	14	tRNA-Leu-TAA-1-1,ACCAGGATGGCCGAGTGGTTAAGGCGTTGGACTTAAGATCCAATGGACATATGTCCGCGTGGGTTCGAACCCCACTCCTGGTACCA,Leu-TAA,0	0	0	0	0	0	0	20	0	0	0	0	0	0	0	0	0	0	0	62.5819	0	0	0	0	0
tRF-1:15-Leu-TAA-1	ACCAGGATGGCCGAG	tRF-5a	-	-	15	tRNA-Leu-TAA-1-1,ACCAGGATGGCCGAGTGGTTAAGGCGTTGGACTTAAGATCCAATGGACATATGTCCGCGTGGGTTCGAACCCCACTCCTGGTACCA,Leu-TAA,0	4	3	9	0	0	0	0	0	19	0	0	38	15.6502	5.06995	25.0984	0	0	0	0	0	54.1252	0	0	74.2599
tRF-1:16-Leu-TAA-1	ACCAGGATGGCCGAGT	tRF-5a	-	-	16	tRNA-Leu-TAA-1-1,ACCAGGATGGCCGAGTGGTTAAGGCGTTGGACTTAAGATCCAATGGACATATGTCCGCGTGGGTTCGAACCCCACTCCTGGTACCA,Leu-TAA,0	15	28	52	14	1	0	0	0	16	28	50	0	58.6884	47.3195	145.013	56.7155	6.74277	0	0	0	45.5791	181.675	218.914	0
tRF-59:75-iMet-CAT-1-M2	ACCATCCTCTGCTACCA	tRF-3a	-	tRF-17-0Q37Q52	17	tRNA-iMet-CAT-1-1,AGCAGAGTGGCGCAGCGGAAGCGTGCTGGGCCCATAACCCAGAGGTCGATGGATCGAAACCATCCTCTGCTACCA,iMet-CAT,58;tRNA-iMet-CAT-2-1,AGCAGAGTGGCGCAGCGGAAGCGTGCTGGGCCCATAACCCAGAGGTCGATGGATCTAAACCATCCTCTGCTACCA,iMet-CAT,58	6	3	10	9	0	12	22	6	0	0	9	1	23.4754	5.06995	27.8871	36.46	0	77.6865	68.8401	26.1525	0	0	39.4046	1.95421
tRF-69:86-Leu-TAA-1	ACCCCACTCCTGGTACCA	tRF-3a	3009a	tRF-18-0RER9LD2	18	tRNA-Leu-TAA-1-1,ACCAGGATGGCCGAGTGGTTAAGGCGTTGGACTTAAGATCCAATGGACATATGTCCGCGTGGGTTCGAACCCCACTCCTGGTACCA,Leu-TAA,68	6	0	0	9	0	2	9	31	0	0	0	0	23.4754	0	0	36.46	0	12.9477	28.1619	135.121	0	0	0	0
tRF-58:75-Thr-CGT-2-M2	ACCCCGTCCGTGCCTCCA	tRF-3a	-	tRF-18-0RSSX7D2	18	tRNA-Thr-CGT-2-1,GGCGCGGTGGCCAAGTGGTAAGGCGTCGGTCTCGTAAACCGAAGATCACGGGTTCGAACCCCGTCCGTGCCTCCA,Thr-CGT,57;tRNA-Thr-CGT-4-1,GGCGCGGTGGCCAAGTGGTAAGGCGTCGGTCTCGTAAACCGAAGATCGCGGGTTCGAACCCCGTCCGTGCCTCCA,Thr-CGT,57	4	3	0	0	0	0	0	19	3	0	0	1	15.6502	5.06995	0	0	0	0	0	82.8161	8.54608	0	0	1.95421
tRF-54:71-chrM.Met-CAT	ACCCTTCCCGTACTACCA	tRF-3a	-	tRF-18-078SUXD2	18	chrM.tRNA5-MetCAT,AGTAAGGTCAGCTAAATAAGCTATCGGGCCCATACCCCGAAAATGTTGGTTATACCCTTCCCGTACTACCA,Met-CAT,53	0	0	10	0	0	0	0	0	1	0	0	0	0	0	27.8871	0	0	0	0	0	2.84869	0	0	0
tRF-1:16-Leu-TAA-2	ACCGGGATGGCCGAGT	tRF-5a	-	-	16	tRNA-Leu-TAA-2-1,ACCGGGATGGCCGAGTGGTTAAGGCGTTGGACTTAAGATCCAATGGGCTGGTGCCCGCGTGGGTTCGAACCCCACTCTCGGTACCA,Leu-TAA,0	0	0	1	0	9	0	0	0	0	0	0	0	0	0	2.78871	0	60.6849	0	0	0	0	0	0	0
tRF-60:76-Val-AAC-5	ACCGGGCAGAAACACCA	tRF-3a	-	-	17	tRNA-Val-AAC-5-1,GTTTCCGTAGTGTAGTGGTTATCACGTTTGCCTAACACGCGAAAGGTCCCCGGTTCGAAACCGGGCAGAAACACCA,Val-AAC,59	8	7	2	3	0	20	2	0	1	14	14	1	31.3005	11.8299	5.57742	12.1533	0	129.477	6.25819	0	2.84869	90.8377	61.296	1.95421
tRF-60:76-Val-CAC-2	ACCGGGCAGAAGCACCA	tRF-3a	-	tRF-17-08P2F52	17	tRNA-Val-CAC-2-1,GCTTCTGTAGTGTAGTGGTTATCACGTTCGCCTCACACGCGAAAGGTCCCCGGTTCGAAACCGGGCAGAAGCACCA,Val-CAC,59	0	0	0	0	0	18	4	31	4	2	33	0	0	0	0	0	0	116.53	12.5164	135.121	11.3948	12.9768	144.483	0
tRF-60:76-Val-AAC-1-M5	ACCGGGCGGAAACACCA	tRF-3a	3008a	tRF-17-08Q2B52	17	tRNA-Val-AAC-1-1,GTTTCCGTAGTGTAGTGGTTATCACGTTCGCCTAACACGCGAAAGGTCCCCGGTTCGAAACCGGGCGGAAACACCA,Val-AAC,59;tRNA-Val-AAC-2-1,GTTTCCGTAGTGTAGTGGTCATCACGTTCGCCTAACACGCGAAAGGTCCCCGGTTCGAAACCGGGCGGAAACACCA,Val-AAC,59;tRNA-Val-AAC-4-1,GTTTCCGTAGTGTAGTGGTTATCACGTTCGCCTAACACGCGAAAGGTCCGCGGTTCGAAACCGGGCGGAAACACCA,Val-AAC,59;tRNA-Val-CAC-1-1,GTTTCCGTAGTGTAGTGGTTATCACGTTCGCCTCACACGCGAAAGGTCCCCGGTTCGAAACCGGGCG…	53	82	74	57	52	136	322	92	115	119	12	134	207.366	138.579	206.364	230.913	350.624	880.447	1007.57	401.004	327.6	772.121	52.5394	261.864
tRF-53:69-chrM.Cys-GCA	ACCTGCCGGGGCTTCCA	tRF-3a	-	-	17	chrM.tRNA19-CysGCA,AGCTCCGAGGTGATTTTCATATTGAATTGCAAATTCGAAGAAGCAGCTTCAAACCTGCCGGGGCTTCCA,Cys-GCA,52	0	0	0	0	0	21	0	0	9	0	0	0	0	0	0	0	0	135.951	0	0	25.6382	0	0	0
tRF-57:75-Glu-TTC-2	ACTCCCGGTGTGGGAACCA	tRF-3b	3015a	-	19	tRNA-Glu-TTC-2-1,TCCCACATGGTCTAGCGGTTAGGATTCCTGGTTTTCACCCAGGCGGCCCGGGTTCGACTCCCGGTGTGGGAACCA,Glu-TTC,56	0	0	0	0	0	0	17	0	0	0	0	0	0	0	0	0	0	0	53.1947	0	0	0	0	0
tRF-58:76-Arg-ACG-1-M2	ACTCCTGGCTGGCTCGCCA	tRF-3b	-	-	19	tRNA-Arg-ACG-1-1,GGGCCAGTGGCGCAATGGATAACGCGTCTGACTACGGATCAGAAGATTCCAGGTTCGACTCCTGGCTGGCTCGCCA,Arg-ACG,57;tRNA-Arg-ACG-2-1,GGGCCAGTGGCGCAATGGATAACGCGTCTGACTACGGATCAGAAGATTCTAGGTTCGACTCCTGGCTGGCTCGCCA,Arg-ACG,57	1	0	14	1	0	0	1	3	2	2	1	43	3.91256	0	39.0419	4.05111	0	0	3.1291	13.0762	5.69739	12.9768	4.37828	84.031
tRF-55:72-chrM.Val-TAC	ACTTGACCGCTCTGACCA	tRF-3a	-	tRF-18-EY0VWUD2	18	chrM.tRNA2-ValTAC,CAGAGTGTAGCTTAACACAAAGCACCCAACTTACACTTAGGAGATTTCAACTTAACTTGACCGCTCTGACCA,Val-TAC,54	12	27	73	37	50	39	188	68	43	35	8	0	46.9507	45.6295	203.576	149.891	337.139	252.481	588.27	296.394	122.494	227.094	35.0263	0
tRF-1:24-chrM.Ile-GAT	AGAAATATGTCTGATAAAAGAGTT	tRF-5b	-	-	24	chrM.tRNA4-IleGAT,AGAAATATGTCTGATAAAAGAGTTACTTTGATAGAGTAAATAATAGGAGCTTAAACCCCCTTATTTCTACCA,Ile-GAT,0	0	0	0	0	0	0	0	0	0	0	0	16	0	0	0	0	0	0	0	0	0	0	0	31.2673
tRF-14:27-chrM.Ser-GCT	AGAACTGCTAACTC	tRF-2	-	-	14	chrM.tRNA12-SerGCT,GAGAAAGCTCACAAGAACTGCTAACTCATGCCCCCATGTCTAACAACATGGCTTTCTCACCA,Ser-GCT,13	4	4	2	0	0	0	0	9	0	0	0	0	15.6502	6.75993	5.57742	0	0	0	0	39.2287	0	0	0	0
tRF-29:43-Phe-GAA-6	AGACTGAAGATCTTA	tRF-2	-	-	15	tRNA-Phe-GAA-6-1,GCTGAAATAGCTCAGTTGGGAGAGCGTTAGACTGAAGATCTTAAAGTTCCCTGGTTCAACCCTGGGTTTCAGCCCCA,Phe-GAA,28	0	0	2	5	0	1	0	4	0	0	3	0	0	0	5.57742	20.2555	0	6.47387	0	17.435	0	0	13.1349	0
tRF-54:71-chrM.Pro-TGG	AGACTTTTTCTCTGACCA	tRF-3a	-	tRF-18-FIZ9WUD2	18	chrM.tRNA15-ProTGG,CAGAGAATAGTTTAAATTAGAATCTTAGCTTTGGGTGCTAATGGTGGAGTTAAAGACTTTTTCTCTGACCA,Pro-TGG,53	86	18	80	35	0	84	160	75	66	1	0	0	336.48	30.4197	223.097	141.789	0	543.805	500.656	326.906	188.014	6.48841	0	0
tRF-+1:T32-Gly-CCC-1	AGAGGGTCTTTTTCACCCCGCTGTTGCTCTTT	tRF-1	-	-	32	pre_tRNA-Gly-CCC-1-1,TACTGTTTTCTGTTATCCTGCAGGCGGTTGTTACGCAGAGGCATTGGTGGTTCAGTGGTAGAATTCTCGCCTCCCACGCGGGAGACCCGGGTTCAATTCCCGGCCAATGCAAGAGGGTCTTTTTCACCCCGCTGTTGCTCTTTATCTGTCT,Gly-CCC,111	1	0	7	4	3	7	0	0	0	0	0	0	3.91256	0	19.521	16.2044	20.2283	45.3171	0	0	0	0	0	0
tRF-26:39-chrM.His-GTG	AGATTGTGAATCTG	tRF-2	-	-	14	chrM.tRNA11-HisGTG,GTAAATATAGTTTAACCAAAACATCAGATTGTGAATCTGACAACAGAGGCTTACGACCCCTTATTTACCCCA,His-GTG,25	0	0	0	0	0	0	0	6	0	0	9	0	0	0	0	0	0	0	0	26.1525	0	0	39.4046	0
tRF-1:22-iMet-CAT-1-M2	AGCAGAGTGGCGCAGCGGAAGC	tRF-5b	-	-	22	tRNA-iMet-CAT-1-1,AGCAGAGTGGCGCAGCGGAAGCGTGCTGGGCCCATAACCCAGAGGTCGATGGATCGAAACCATCCTCTGCTACCA,iMet-CAT,0;tRNA-iMet-CAT-2-1,AGCAGAGTGGCGCAGCGGAAGCGTGCTGGGCCCATAACCCAGAGGTCGATGGATCTAAACCATCCTCTGCTACCA,iMet-CAT,0	1	0	0	0	21	0	0	0	0	0	0	0	3.91256	0	0	0	141.598	0	0	0	0	0	0	0
tRF-1:30-iMet-CAT-1-M2	AGCAGAGTGGCGCAGCGGAAGCGTGCTGGG	tRF-5c	-	tRF-30-FP18LPMBQ4NK	30	tRNA-iMet-CAT-1-1,AGCAGAGTGGCGCAGCGGAAGCGTGCTGGGCCCATAACCCAGAGGTCGATGGATCGAAACCATCCTCTGCTACCA,iMet-CAT,0;tRNA-iMet-CAT-2-1,AGCAGAGTGGCGCAGCGGAAGCGTGCTGGGCCCATAACCCAGAGGTCGATGGATCTAAACCATCCTCTGCTACCA,iMet-CAT,0	0	2	0	0	3	0	2	1	10	1	26	3	0	3.37997	0	0	20.2283	0	6.25819	4.35874	28.4869	6.48841	113.835	5.86263
tRF-1:31-iMet-CAT-1-M2	AGCAGAGTGGCGCAGCGGAAGCGTGCTGGGC	tRF-5c	-	tRF-31-FP18LPMBQ4NKD	31	tRNA-iMet-CAT-1-1,AGCAGAGTGGCGCAGCGGAAGCGTGCTGGGCCCATAACCCAGAGGTCGATGGATCGAAACCATCCTCTGCTACCA,iMet-CAT,0;tRNA-iMet-CAT-2-1,AGCAGAGTGGCGCAGCGGAAGCGTGCTGGGCCCATAACCCAGAGGTCGATGGATCTAAACCATCCTCTGCTACCA,iMet-CAT,0	38	101	57	20	36	19	57	26	164	41	0	949	148.677	170.688	158.956	81.0222	242.74	123.004	178.359	113.327	467.186	266.025	0	1854.54
tRF-1:32-iMet-CAT-1-M2	AGCAGAGTGGCGCAGCGGAAGCGTGCTGGGCC	tRF-5c	-	tRF-32-FP18LPMBQ4NKJ	32	tRNA-iMet-CAT-1-1,AGCAGAGTGGCGCAGCGGAAGCGTGCTGGGCCCATAACCCAGAGGTCGATGGATCGAAACCATCCTCTGCTACCA,iMet-CAT,0;tRNA-iMet-CAT-2-1,AGCAGAGTGGCGCAGCGGAAGCGTGCTGGGCCCATAACCCAGAGGTCGATGGATCTAAACCATCCTCTGCTACCA,iMet-CAT,0	0	0	0	0	1	0	0	0	1	0	46	0	0	0	0	0	6.74277	0	0	0	2.84869	0	201.401	0
tiRNA-1:33-iMet-CAT-1-M2	AGCAGAGTGGCGCAGCGGAAGCGTGCTGGGCCC	tiRNA-5	-	tRF-33-FP18LPMBQ4NKDJ	33	tRNA-iMet-CAT-1-1,AGCAGAGTGGCGCAGCGGAAGCGTGCTGGGCCCATAACCCAGAGGTCGATGGATCGAAACCATCCTCTGCTACCA,iMet-CAT,0;tRNA-iMet-CAT-2-1,AGCAGAGTGGCGCAGCGGAAGCGTGCTGGGCCCATAACCCAGAGGTCGATGGATCTAAACCATCCTCTGCTACCA,iMet-CAT,0	0	0	0	0	0	0	0	0	0	1	38	0	0	0	0	0	0	0	0	0	0	6.48841	166.375	0
tRF-59:77-Asn-GTT-2-M4	AGCCCACCCAGGGACGCCA	tRF-3b	-	-	19	tRNA-Asn-GTT-2-1,GTCTCTGTGGCGCAATCGGTTAGCGCGTTCGGCTGTTAACCGAAAGGTTGGTGGTTCGAGCCCACCCAGGGACGCCA,Asn-GTT,58;tRNA-Asn-GTT-3-1,GTCTCTGTGGCGCAATCGGTTAGCGCATTCGGCTGTTAACCGAAAGGTTGGTGGTTCGAGCCCACCCAGGGACGCCA,Asn-GTT,58;tRNA-Asn-GTT-4-1,GTCTCTGTGGCGCAATCGGTTAGCGCGTTCGGCTGTTAACCGAAAGATTGGTGGTTCGAGCCCACCCAGGGACGCCA,Asn-GTT,58;tRNA-Asn-GTT-5-1,GTCTCTGTGGCGCAATCGGTTAGCGCGTTCGGCTGTTAACTGAAAGGTTGGTGGTTCGAGCCCA…	0	0	0	0	0	0	0	0	0	0	35	0	0	0	0	0	0	0	0	0	0	0	153.24	0
tRF-58:76-Val-TAC-1-M3	AGCCCCAGTGGAACCACCA	tRF-3b	3017a	tRF-19-FRJ4O1E2	19	tRNA-Val-TAC-1-1,GGTTCCATAGTGTAGTGGTTATCACGTCTGCTTTACACGCAGAAGGTCCTGGGTTCGAGCCCCAGTGGAACCACCA,Val-TAC,57;tRNA-Val-TAC-2-1,GGTTCCATAGTGTAGCGGTTATCACGTCTGCTTTACACGCAGAAGGTCCTGGGTTCGAGCCCCAGTGGAACCACCA,Val-TAC,57;tRNA-Val-TAC-3-1,GGTTCCATAGTGTAGTGGTTATCACATCTGCTTTACACGCAGAAGGTCCTGGGTTCAAGCCCCAGTGGAACCACCA,Val-TAC,57	0	0	3	0	0	0	0	6	2	0	49	0	0	0	8.36612	0	0	0	0	26.1525	5.69739	0	214.536	0
tRF-1:15-chrM.Cys-GCA	AGCTCCGAGGTGATT	tRF-5a	-	-	15	chrM.tRNA19-CysGCA,AGCTCCGAGGTGATTTTCATATTGAATTGCAAATTCGAAGAAGCAGCTTCAAACCTGCCGGGGCTTCCA,Cys-GCA,0	0	0	0	0	0	0	0	9	0	0	0	0	0	0	0	0	0	0	0	39.2287	0	0	0	0
tRF-+1:T19-Ala-CGC-2	AGGCGATCACGTAGATTTT	tRF-1	-	-	19	pre_tRNA-Ala-CGC-2-1,TAACATGACAGGAATTCTCCGTTACAACCGACTTGTGCCAGGGGATGTAGCTCAGTGGTAGAGCGCATGCTTCGCATGTATGAGGCCCCGGGTTCGATCCCCGGCATCTCCAAGGCGATCACGTAGATTTTGTTTAATTCAGCCTCTGGAAC,Ala-CGC,112	17	8	0	15	0	0	49	0	0	0	0	0	66.5136	13.5199	0	60.7666	0	0	153.326	0	0	0	0	0
tRF-1:14-chrM.Met-CAT	AGTAAGGTCAGCTA	tRF-5a	-	-	14	chrM.tRNA5-MetCAT,AGTAAGGTCAGCTAAATAAGCTATCGGGCCCATACCCCGAAAATGTTGGTTATACCCTTCCCGTACTACCA,Met-CAT,0	0	0	0	5	0	0	0	0	5	0	0	0	0	0	0	20.2555	0	0	0	0	14.2435	0	0	0
tRF-1:22-chrM.Met-CAT	AGTAAGGTCAGCTAAATAAGCT	tRF-5b	-	tRF-22-1OR6QOH03	22	chrM.tRNA5-MetCAT,AGTAAGGTCAGCTAAATAAGCTATCGGGCCCATACCCCGAAAATGTTGGTTATACCCTTCCCGTACTACCA,Met-CAT,0	0	0	0	0	0	0	0	1	1	1	16	0	0	0	0	0	0	0	0	4.35874	2.84869	6.48841	70.0525	0
tRF-1:23-chrM.Met-CAT	AGTAAGGTCAGCTAAATAAGCTA	tRF-5b	-	-	23	chrM.tRNA5-MetCAT,AGTAAGGTCAGCTAAATAAGCTATCGGGCCCATACCCCGAAAATGTTGGTTATACCCTTCCCGTACTACCA,Met-CAT,0	0	0	13	0	0	0	0	0	0	0	0	0	0	0	36.2532	0	0	0	0	0	0	0	0	0
tRF-1:28-chrM.Met-CAT	AGTAAGGTCAGCTAAATAAGCTATCGGG	tRF-5c	-	tRF-28-1OR6QOH04MDY	28	chrM.tRNA5-MetCAT,AGTAAGGTCAGCTAAATAAGCTATCGGGCCCATACCCCGAAAATGTTGGTTATACCCTTCCCGTACTACCA,Met-CAT,0	7	0	0	4	3	2	10	3	0	4	165	15	27.3879	0	0	16.2044	20.2283	12.9477	31.291	13.0762	0	25.9536	722.417	29.3131
tRF-1:29-chrM.Met-CAT	AGTAAGGTCAGCTAAATAAGCTATCGGGC	tRF-5c	-	tRF-29-1OR6QOH04MI9	29	chrM.tRNA5-MetCAT,AGTAAGGTCAGCTAAATAAGCTATCGGGCCCATACCCCGAAAATGTTGGTTATACCCTTCCCGTACTACCA,Met-CAT,0	8	3	8	9	4	2	0	18	5	8	580	139	31.3005	5.06995	22.3097	36.46	26.9711	12.9477	0	78.4574	14.2435	51.9073	2539.4	271.635
tRF-1:30-chrM.Met-CAT	AGTAAGGTCAGCTAAATAAGCTATCGGGCC	tRF-5c	-	tRF-30-1OR6QOH04MR1	30	chrM.tRNA5-MetCAT,AGTAAGGTCAGCTAAATAAGCTATCGGGCCCATACCCCGAAAATGTTGGTTATACCCTTCCCGTACTACCA,Met-CAT,0	2	0	4	2	5	1	2	2	0	3	165	16	7.82512	0	11.1548	8.10222	33.7139	6.47387	6.25819	8.71748	0	19.4652	722.417	31.2673
tiRNA-1:31-chrM.Met-CAT	AGTAAGGTCAGCTAAATAAGCTATCGGGCCC	tiRNA-5	-	tRF-31-1OR6QOH04MR1D	31	chrM.tRNA5-MetCAT,AGTAAGGTCAGCTAAATAAGCTATCGGGCCCATACCCCGAAAATGTTGGTTATACCCTTCCCGTACTACCA,Met-CAT,0	1	0	2	1	3	0	0	2	1	0	171	0	3.91256	0	5.57742	4.05111	20.2283	0	0	8.71748	2.84869	0	748.687	0
tRF-1:32-chrM.Met-CAT	AGTAAGGTCAGCTAAATAAGCTATCGGGCCCA	tRF-5c	-	tRF-32-1OR6QOH04MR12	32	chrM.tRNA5-MetCAT,AGTAAGGTCAGCTAAATAAGCTATCGGGCCCATACCCCGAAAATGTTGGTTATACCCTTCCCGTACTACCA,Met-CAT,0	0	0	1	0	0	0	0	0	0	1	30	0	0	0	2.78871	0	0	0	0	0	0	6.48841	131.349	0
tRF-+1:T18-Ile-AAT-2	AGTATTCTCTGTGGCTTT	tRF-1	-	-	18	pre_tRNA-Ile-AAT-2-1,ATAGTAGCTTATAATGTGGAAGTAAGGCATCCTGTCATCCGGCCGGTTAGCTCAGTTGGTTAGAGCGTGGTGCTAATAACGCCAAGGTCGCGGGTTCGATCCCCGTACTGGCCAAGTATTCTCTGTGGCTTTTATCACCAGAATGGATAGTAAC,Ile-AAT,114	8	0	26	2	2	0	0	0	0	0	0	0	31.3005	0	72.5064	8.10222	13.4855	0	0	0	0	0	0	0
tRF-57:75-Trp-CCA-2	AGTCACGTCGGGGTCACCA	tRF-3b	-	tRF-19-16MSRME2	19	tRNA-Trp-CCA-2-1,GACCTCGTGGCGCAATGGTAGCGCGTCTGACTCCAGATCAGAAGGTTGCGTGTTCAAGTCACGTCGGGGTCACCA,Trp-CCA,56	1	2	0	0	0	1	1	1	2	1	15	0	3.91256	3.37997	0	0	0	6.47387	3.1291	4.35874	5.69739	6.48841	65.6743	0
tRF-57:75-Gln-CTG-2-M3	AGTCTCGGTGGAACCTCCA	tRF-3b	-	-	19	tRNA-Gln-CTG-2-1,GGTTCCATGGTGTAATGGTTAGCACTCTGGACTCTGAATCCAGCGATCCGAGTTCAAGTCTCGGTGGAACCTCCA,Gln-CTG,56;tRNA-Gln-CTG-3-1,GGTTCCATGGTGTAATGGTGAGCACTCTGGACTCTGAATCCAGCGATCCGAGTTCGAGTCTCGGTGGAACCTCCA,Gln-CTG,56;tRNA-Gln-CTG-4-1,GGTTCCATGGTGTAATGGTAAGCACTCTGGACTCTGAATCCAGCGATCCGAGTTCGAGTCTCGGTGGAACCTCCA,Gln-CTG,56	0	0	2	9	1	0	21	26	4	4	4	1	0	0	5.57742	36.46	6.74277	0	65.711	113.327	11.3948	25.9536	17.5131	1.95421
tRF-55:71-chrM.Trp-TCA	ATACTTAATTTCTGCCA	tRF-3a	-	tRF-17-HIUNWV2	17	chrM.tRNA6-TrpTCA,AGAAATTTAGGTTAAATACAGACCAAGAGCCTTCAAAGCCCTCAGTAAGTTGCAATACTTAATTTCTGCCA,Trp-TCA,54	0	7	26	0	0	0	0	2	0	0	0	0	0	11.8299	72.5064	0	0	0	0	8.71748	0	0	0	0
tRF-+1:T24-Leu-CAG-1-6	ATATGTGTTTTCCGTCCTTACTTT	tRF-1	-	-	24	pre_tRNA-Leu-CAG-1-6,GATAAAATTAGGAGAAATTAGGAAGCATGGTAAAACATGTGTCAGGATGGCCGAGCGGTCTAAGGCGCTGCGTTCAGGTCGCAGTCTCCCCTGGAGGCGTGGGTTCGAATCCCACTCCTGACAATATGTGTTTTCCGTCCTTACTTTTCCTCCTGATTTGAAC,Leu-CAG,123	0	0	0	16	2	0	0	0	0	0	0	0	0	0	0	64.8177	13.4855	0	0	0	0	0	0	0
tRF-57:74-chrM.Phe-GAA	ATCACCCCATAAACACCA	tRF-3a	-	tRF-18-H5KQBFD2	18	chrM.tRNA1-PheGAA,GTTTATGTAGCTTACCTCCTCAAAGCAATACACTGAAAATGTTTAGACGGGCTCACATCACCCCATAAACACCA,Phe-GAA,56	4	0	13	0	0	0	0	0	0	0	0	34	15.6502	0	36.2532	0	0	0	0	0	0	0	0	66.4431
tRF-58:75-Trp-CCA-1-M4	ATCACGTCGGGGTCACCA	tRF-3a	-	tRF-18-H5S8R6D2	18	tRNA-Trp-CCA-1-1,GGCCTCGTGGCGCAACGGTAGCGCGTCTGACTCCAGATCAGAAGGTTGCGTGTTCAAATCACGTCGGGGTCACCA,Trp-CCA,57;tRNA-Trp-CCA-3-1,GACCTCGTGGCGCAACGGTAGCGCGTCTGACTCCAGATCAGAAGGTTGCGTGTTCAAATCACGTCGGGGTCACCA,Trp-CCA,57;tRNA-Trp-CCA-4-1,GACCTCGTGGCGCAACGGTAGCGCGTCTGACTCCAGATCAGAAGGCTGCGTGTTCGAATCACGTCGGGGTCACCA,Trp-CCA,57;tRNA-Trp-CCA-5-1,GACCTCGTGGCGCAACGGCAGCGCGTCTGACTCCAGATCAGAAGGTTGCGTGTTCAAATCACGTCGGGGT…	42	50	77	69	120	31	122	70	18	98	105	56	164.328	84.4991	214.731	279.527	809.132	200.69	381.75	305.112	51.2765	635.864	459.72	109.436
tRF-58:75-Cys-GCA-1-M8	ATCCAGGTGCCCCCTCCA	tRF-3a	-	tRF-18-H6RVK7D2	18	tRNA-Cys-GCA-1-1,GGGGGCATAGCTCAGTGGTAGAGCATTTGACTGCAGATCAAGAGGTCCCTGGTTCAAATCCAGGTGCCCCCTCCA,Cys-GCA,57;tRNA-Cys-GCA-15-1,GGGGGTATAGCTCAGGGGTAGAGCATTTGACTGCAGATCAAGAGGTCTCTGGTTCAAATCCAGGTGCCCCCTCCA,Cys-GCA,57;tRNA-Cys-GCA-16-1,GGGGGTATAGCTCAGGGGTAGAGCACTTGACTGCAGATCAAGAAGTCCTTGGTTCAAATCCAGGTGCCCCCTCCA,Cys-GCA,57;tRNA-Cys-GCA-18-1,GGGGGTATAGTTCAGGGGTAGAGCATTTGACTGCAGATCAAGAGGTCCCTGGTTCAAATCCAGGTGC…	0	0	0	0	0	6	0	0	0	0	23	0	0	0	0	0	0	38.8432	0	0	0	0	100.701	0
tRF-68:85-Leu-TAG-2	ATCCCACCACTGCCACCA	tRF-3a	3010a	tRF-18-HR05X6D2	18	tRNA-Leu-TAG-2-1,GGTAGTGTGGCCGAGCGGTCTAAGGCGCTGGATTTAGGCTCCAGTCTCTTCGGGGGCGTGGGTTCGAATCCCACCACTGCCACCA,Leu-TAG,67	0	4	12	0	0	8	0	22	0	0	8	0	0	6.75993	33.4645	0	0	51.791	0	95.8923	0	0	35.0263	0
tRF-68:85-Leu-AAG-1-M6	ATCCCACCGCTGCCACCA	tRF-3a	3001a	tRF-18-HR0VX6D2	18	tRNA-Leu-AAG-1-1,GGTAGCGTGGCCGAGCGGTCTAAGGCGCTGGATTAAGGCTCCAGTCTCTTCGGAGGCGTGGGTTCGAATCCCACCGCTGCCACCA,Leu-AAG,67;tRNA-Leu-AAG-2-1,GGTAGCGTGGCCGAGCGGTCTAAGGCGCTGGATTAAGGCTCCAGTCTCTTCGGGGGCGTGGGTTCGAATCCCACCGCTGCCACCA,Leu-AAG,67;tRNA-Leu-AAG-3-1,GGTAGCGTGGCCGAGCGGTCTAAGGCGCTGGATTAAGGCTCCAGTCTCTTCGGGGGCGTGGGTTCAAATCCCACCGCTGCCACCA,Leu-AAG,67;tRNA-Leu-AAG-4-1,GGTAGCGTGGCCGAGTGGTCTAAGACGCTGGATTAAGGCT…	21	44	72	5	25	63	48	113	88	101	62	72	82.1638	74.3592	200.787	20.2555	168.569	407.854	150.197	492.538	250.685	655.329	271.454	140.703
tRF-69:86-Leu-CAG-1	ATCCCACTCCTGACACCA	tRF-3a	3011a	tRF-18-HRERXFD2	18	tRNA-Leu-CAG-1-1,GTCAGGATGGCCGAGCGGTCTAAGGCGCTGCGTTCAGGTCGCAGTCTCCCCTGGAGGCGTGGGTTCGAATCCCACTCCTGACACCA,Leu-CAG,68	6	8	39	13	34	34	2	40	36	0	1	0	23.4754	13.5199	108.76	52.6644	229.254	220.112	6.25819	174.35	102.553	0	4.37828	0
tRF-69:86-Leu-CAA-1-M5	ATCCCACTTCTGACACCA	tRF-3a	3012a	tRF-18-HRE9XFD2	18	tRNA-Leu-CAA-1-1,GTCAGGATGGCCGAGTGGTCTAAGGCGCCAGACTCAAGTTCTGGTCTCCAATGGAGGCGTGGGTTCGAATCCCACTTCTGACACCA,Leu-CAA,68;tRNA-Leu-CAA-2-1,GTCAGGATGGCCGAGTGGTCTAAGGCGCCAGACTCAAGTTCTGGTCTCCGTATGGAGGCGTGGGTTCGAATCCCACTTCTGACACCA,Leu-CAA,69;tRNA-Leu-CAA-3-1,GTCAGGATGGCCGAGTGGTCTAAGGCGCCAGACTCAAGTTCTGGTCTCCGCATGGAGGCGTGGGTTCGAATCCCACTTCTGACACCA,Leu-CAA,69;tRNA-Leu-CAA-4-1,GTCAGGATGGCCGAGTGGTCTAAGGCGCCAGACTC…	42	39	108	132	69	80	122	58	76	41	160	19	164.328	65.9093	301.18	534.746	465.251	517.91	381.75	252.807	216.501	266.025	700.525	37.13
tRF-60:77-Thr-AGT-1-M2	ATCCCAGCGGTGCCTCCA	tRF-3a	-	tRF-18-HRF8X7D2	18	tRNA-Thr-AGT-1-1,GGCGCCGTGGCTTAGTTGGTTAAAGCGCCTGTCTAGTAAACAGGAGATCCTGGGTTCGAATCCCAGCGGTGCCTCCA,Thr-AGT,59;tRNA-Thr-AGT-5-1,GGCGCCGTGGCTTAGCTGGTTAAAGCGCCTGTCTAGTAAACAGGAGATCCTGGGTTCGAATCCCAGCGGTGCCTCCA,Thr-AGT,59	2	2	5	6	0	1	1	22	22	1	0	44	7.82512	3.37997	13.9435	24.3067	0	6.47387	3.1291	95.8923	62.6713	6.48841	0	85.9852
tRF-60:77-Thr-TGT-1	ATCCCAGTAGAGCCTCCA	tRF-3a	-	tRF-18-HR1PF7D2	18	tRNA-Thr-TGT-1-1,GGCTCTATGGCTTAGTTGGTTAAAGCGCCTGTCTTGTAAACAGGAGATCCTGGGTTCGAATCCCAGTAGAGCCTCCA,Thr-TGT,59	0	0	0	0	68	0	25	1	0	1	0	0	0	0	0	0	458.508	0	78.2274	4.35874	0	6.48841	0	0
tRF-68:85-Ser-GCT-3-M4	ATCCCATCCTCGTCGCCA	tRF-3a	-	tRF-18-HRH7MSD2	18	tRNA-Ser-GCT-3-1,GACGAGGTGGCCGAGTGGTTAAGGCGATGGACTGCTAATCCATTGTGCTTTGCACGCGTGGGTTCGAATCCCATCCTCGTCGCCA,Ser-GCT,67;tRNA-Ser-GCT-4-1,GACGAGGTGGCCGAGTGGTTAAGGCGATGGACTGCTAATCCATTGTGCTCTGCACGCGTGGGTTCGAATCCCATCCTCGTCGCCA,Ser-GCT,67;tRNA-Ser-GCT-5-1,GACGAGGTGGCCGAGTGGTTAAGGCGATGGACTGCTAATCCATTGTGCTCTGCACACGTGGGTTCGAATCCCATCCTCGTCGCCA,Ser-GCT,67;tRNA-Ser-GCT-6-1,GGAGAGGCCTGGCCGAGTGGTTAAGGCGATGGACTGCTAA…	0	2	23	7	0	9	20	2	1	0	8	5	0	3.37997	64.1403	28.3578	0	58.2649	62.5819	8.71748	2.84869	0	35.0263	9.77104
tRF-57:75-Ala-AGC-1	ATCCCCAGTACCTCCACCA	tRF-3b	-	tRF-19-HRJL3RE2	19	tRNA-Ala-AGC-1-1,GGGGGTATAGCTCAGTGGTAGAGCGCGTGCTTAGCATGCACGAGGTCCTGGGTTCGATCCCCAGTACCTCCACCA,Ala-AGC,56	0	0	0	0	0	1	0	0	8	0	0	0	0	0	0	0	0	6.47387	0	0	22.7896	0	0	0
tRF-57:75-Ala-TGC-5-M2	ATCCCCGACACCTCCACCA	tRF-3b	-	-	19	tRNA-Ala-TGC-5-1,GGGGGTGTAGCTCAGTGGTAGAGCGCATGCTTTGCATGTATGAGGCCTCGGGTTCGATCCCCGACACCTCCACCA,Ala-TGC,56;tRNA-Ala-TGC-7-1,GGGGGTGTAGCTCAGTGGTAGAGCGCATGCTTTGCATGTATGAGGCCTCGGTTCGATCCCCGACACCTCCACCA,Ala-TGC,55	0	0	0	0	0	0	0	0	9	0	0	0	0	0	0	0	0	0	0	0	25.6382	0	0	0
tRF-57:75-Ala-AGC-2-M4	ATCCCCGGCACCTCCACCA	tRF-3b	-	tRF-19-HRMF3RE2	19	tRNA-Ala-AGC-2-1,GGGGGTGTAGCTCAGTGGTAGAGCGCGTGCTTAGCATGCACGAGGCCCCGGGTTCAATCCCCGGCACCTCCACCA,Ala-AGC,56;tRNA-Ala-AGC-3-1,GGGGGTGTAGCTCAGTGGTAGAGCGCGTGCTTAGCATGTACGAGGTCCCGGGTTCAATCCCCGGCACCTCCACCA,Ala-AGC,56;tRNA-Ala-TGC-1-1,GGGGGTGTAGCTCAGTGGTAGAGCGCATGCTTTGCATGTATGAGGTCCCGGGTTCGATCCCCGGCACCTCCACCA,Ala-TGC,56;tRNA-Ala-TGC-6-1,GGGGGTGTAGCTCAGTGGTAGAGCACATGCTTTGCATGTGTGAGGCCCCGGGTTCGATCCCCGGCACCTC…	0	0	12	0	0	0	1	37	2	23	12	0	0	0	33.4645	0	0	0	3.1291	161.273	5.69739	149.233	52.5394	0
tRF-57:75-Ala-CGC-1-M6	ATCCCCGGCATCTCCACCA	tRF-3b	-	tRF-19-HRMFWRE2	19	tRNA-Ala-CGC-1-1,GGGGATGTAGCTCAGTGGTAGAGCGCATGCTTCGCATGTATGAGGTCCCGGGTTCGATCCCCGGCATCTCCACCA,Ala-CGC,56;tRNA-Ala-CGC-2-1,GGGGATGTAGCTCAGTGGTAGAGCGCATGCTTCGCATGTATGAGGCCCCGGGTTCGATCCCCGGCATCTCCACCA,Ala-CGC,56;tRNA-Ala-CGC-3-1,GGGGATGTAGCTCAGTGGTAGAGCGCGCGCTTCGCATGTGTGAGGTCCCGGGTTCAATCCCCGGCATCTCCACCA,Ala-CGC,56;tRNA-Ala-TGC-2-1,GGGGATGTAGCTCAGTGGTAGAGCGCATGCTTTGCATGTATGAGGTCCCGGGTTCGATCCCCGGCATCTC…	0	2	40	4	0	0	0	0	9	43	1	2	0	3.37997	111.548	16.2044	0	0	0	0	25.6382	279.002	4.37828	3.90842
tRF-59:77-Ile-AAT-1-M4	ATCCCCGTACGGGCCACCA	tRF-3b	-	-	19	tRNA-Ile-AAT-1-1,GGCCGGTTAGCTCAGTTGGTTAGAGCGTGGCGCTAATAACGCCAAGGTCGCGGGTTCGATCCCCGTACGGGCCACCA,Ile-AAT,58;tRNA-Ile-AAT-5-1,GGCCGGTTAGCTCAGTTGGTTAGAGCGTGGTGCTAATAACGCCAAGGTCGCGGGTTCGATCCCCGTACGGGCCACCA,Ile-AAT,58;tRNA-Ile-AAT-7-1,GGCCGGTTAGCTCAGTTGGTCAGAGCGTGGTGCTAATAACGCCAAGGTCGCGGGTTCGATCCCCGTACGGGCCACCA,Ile-AAT,58;tRNA-Ile-AAT-8-1,GGCCGGTTAGCTCAGTCGGCTAGAGCGTGGTGCTAATAACGCCAAGGTCGCGGGTTCGATCCCC…	0	0	8	0	0	17	1	22	1	0	0	12	0	0	22.3097	0	0	110.056	3.1291	95.8923	2.84869	0	0	23.4505
tRF-58:74-Pro-AGG-1-M7-16:C>A	ATCCCGGACGAGCCCCA	tRF-3a	-	-	17	tRNA-Pro-AGG-1-1,GGCTCGTTGGTCTAGGGGTATGATTCTCGCTTAGGATGCGAGAGGTCCCGGGTTCAAATCCCGGACGAGCCCCCA,Pro-AGG,57;tRNA-Pro-AGG-2-1,GGCTCGTTGGTCTAGGGGTATGATTCTCGCTTAGGGTGCGAGAGGTCCCGGGTTCAAATCCCGGACGAGCCCCCA,Pro-AGG,57;tRNA-Pro-CGG-1-1,GGCTCGTTGGTCTAGGGGTATGATTCTCGCTTCGGGTGCGAGAGGTCCCGGGTTCAAATCCCGGACGAGCCCCCA,Pro-CGG,57;tRNA-Pro-CGG-2-1,GGCTCGTTGGTCTAGGGGTATGATTCTCGCTTCGGGTGTGAGAGGTCCCGGGTTCAAATCCCGGACGAGC…	4	10	8	12	12	22	20	1	11	7	4	26	15.6502	16.8998	22.3097	48.6133	80.9132	142.425	62.5819	4.35874	31.3356	45.4189	17.5131	50.8094
tRF-58:75-Pro-AGG-1-M7	ATCCCGGACGAGCCCCCA	tRF-3a	3002a	tRF-18-HR6HFRD2	18	tRNA-Pro-AGG-1-1,GGCTCGTTGGTCTAGGGGTATGATTCTCGCTTAGGATGCGAGAGGTCCCGGGTTCAAATCCCGGACGAGCCCCCA,Pro-AGG,57;tRNA-Pro-AGG-2-1,GGCTCGTTGGTCTAGGGGTATGATTCTCGCTTAGGGTGCGAGAGGTCCCGGGTTCAAATCCCGGACGAGCCCCCA,Pro-AGG,57;tRNA-Pro-CGG-1-1,GGCTCGTTGGTCTAGGGGTATGATTCTCGCTTCGGGTGCGAGAGGTCCCGGGTTCAAATCCCGGACGAGCCCCCA,Pro-CGG,57;tRNA-Pro-CGG-2-1,GGCTCGTTGGTCTAGGGGTATGATTCTCGCTTCGGGTGTGAGAGGTCCCGGGTTCAAATCCCGGACGAGC…	40	81	189	132	319	133	125	137	124	252	165	273	156.502	136.889	527.066	534.746	2150.94	861.025	391.137	597.148	353.238	1635.08	722.417	533.499
tRF-58:75-His-GTG-1-M2	ATCCGAGTCACGGCACCA	tRF-3a	-	-	18	tRNA-His-GTG-1-1,GCCGTGATCGTATAGTGGTTAGTACTCTGCGTTGTGGCCGCAGCAACCTCGGTTCGAATCCGAGTCACGGCACCA,His-GTG,57;tRNA-His-GTG-2-1,GCCATGATCGTATAGTGGTTAGTACTCTGCGCTGTGGCCGCAGCAACCTCGGTTCGAATCCGAGTCACGGCACCA,His-GTG,57	0	0	21	8	0	0	2	0	1	0	0	14	0	0	58.5629	32.4089	0	0	6.25819	0	2.84869	0	0	27.3589
tRF-59:76-Tyr-GTA-1-M2	ATCCGGCTCGAAGGACCA	tRF-3a	-	tRF-18-HSQSD2D2	18	tRNA-Tyr-GTA-1-1,CCTTCGATAGCTCAGTTGGTAGAGCGGAGGACTGTAGATCCTTAGGTCGCTGGTTCGAATCCGGCTCGAAGGACCA,Tyr-GTA,58;tRNA-Tyr-GTA-8-1,CTTTCGATAGCTCAGTTGGTAGAGCGGAGGACTGTAGATCCTTAGGTCGCTGGTTCGAATCCGGCTCGAAGGACCA,Tyr-GTA,58	40	44	90	81	28	72	590	80	160	50	100	42	156.502	74.3592	250.984	328.14	188.798	466.119	1846.17	348.699	455.791	324.42	437.828	82.0768
tRF-59:76-Tyr-GTA-3-M2	ATCCGGCTCGGAGGACCA	tRF-3a	-	tRF-18-HSQS52D2	18	tRNA-Tyr-GTA-3-1,CCTTCGATAGCTCAGTTGGTAGAGCGGAGGACTGTAGATCCTTAGGTCGCTGGTTCGAATCCGGCTCGGAGGACCA,Tyr-GTA,58;tRNA-Tyr-GTA-6-1,CCTTCGATAGCTCAGCTGGTAGAGCGGAGGACTGTAGATCCTTAGGTCGCTGGTTCGAATCCGGCTCGGAGGACCA,Tyr-GTA,58	2	21	68	66	105	40	251	57	55	143	4	4	7.82512	35.4896	189.632	267.373	707.991	258.955	785.403	248.448	156.678	927.842	17.5131	7.81684
tRF-58:75-Cys-GCA-11-M7	ATCCGGGTGCCCCCTCCA	tRF-3a	-	tRF-18-HSRVK7D2	18	tRNA-Cys-GCA-11-1,GGGGGTATAGCTTAGCGGTAGAGCATTTGACTGCAGATCAAGAGGTCCCCGGTTCAAATCCGGGTGCCCCCTCCA,Cys-GCA,57;tRNA-Cys-GCA-14-1,GGGGGTATAGCTCAGGGGTAGAGCATTTGACTGCAGATCAAGAAGTCCCCGGTTCAAATCCGGGTGCCCCCTCCA,Cys-GCA,57;tRNA-Cys-GCA-2-1,GGGGGTATAGCTCAGTGGTAGAGCATTTGACTGCAGATCAAGAGGTCCCCGGTTCAAATCCGGGTGCCCCCTCCA,Cys-GCA,57;tRNA-Cys-GCA-4-1,GGGGGTATAGCTCAGTGGTAGAGCATTTGACTGCAGATCAAGAGGTCCCTGGTTCAAATCCGGGTGCC…	0	4	2	6	58	2	0	47	32	65	0	19	0	6.75993	5.57742	24.3067	391.081	12.9477	0	204.861	91.1582	421.747	0	37.13
tRF-59:77-Ile-TAT-1	ATCCTCACCTGGAGCACCA	tRF-3b	-	-	19	tRNA-Ile-TAT-1-1,GCTCCAGTGGCGCAATCGGTTAGCGCGCGGTACTTATAATGCCGAGGTTGTGAGTTCGATCCTCACCTGGAGCACCA,Ile-TAT,58	0	0	0	0	0	9	0	0	0	0	0	0	0	0	0	0	0	58.2649	0	0	0	0	0	0
tRF-68:85-Ser-AGA-1-M6	ATCCTGCCGACTACGCCA	tRF-3a	3014a	tRF-18-H7PU4HD2	18	tRNA-Ser-AGA-1-1,GTAGTCGTGGCCGAGTGGTTAAGGCGATGGACTAGAAATCCATTGGGGTTTCCCCGCGCAGGTTCGAATCCTGCCGACTACGCCA,Ser-AGA,67;tRNA-Ser-AGA-2-1,GTAGTCGTGGCCGAGTGGTTAAGGCGATGGACTAGAAATCCATTGGGGTCTCCCCGCGCAGGTTCGAATCCTGCCGACTACGCCA,Ser-AGA,67;tRNA-Ser-AGA-3-1,GTAGTCGTGGCCGAGTGGTTAAGGCGATGGACTAGAAATCCATTGGGGTTTCCCCACGCAGGTTCGAATCCTGCCGACTACGCCA,Ser-AGA,67;tRNA-Ser-AGA-4-1,GTAGTCGTGGCCGAGTGGTTAAGGTGATGGACTAGAAACC…	22	6	18	22	68	10	65	0	31	0	2	47	86.0764	10.1399	50.1967	89.1244	458.508	64.7387	203.391	0	88.3095	0	8.75657	91.8478
tRF-68:85-Ser-TGA-4	ATCCTGTCGGCTACGCCA	tRF-3a	-	tRF-18-H7S84HD2	18	tRNA-Ser-TGA-4-1,GTAGTCGTGGCCGAGTGGTTAAGGCGATGGACTTGAAATCCATTGGGGTTTCCCCGCGCAGGTTCGAATCCTGTCGGCTACGCCA,Ser-TGA,67	0	6	4	3	0	32	65	8	0	1	89	0	0	10.1399	11.1548	12.1533	0	207.164	203.391	34.8699	0	6.48841	389.667	0
tRF-68:85-Ser-CGA-4	ATCCTGTTCGTGACGCCA	tRF-3a	-	tRF-18-H77SXHD2	18	tRNA-Ser-CGA-4-1,GTCACGGTGGCCGAGTGGTTAAGGCGTTGGACTCGAAATCCAATGGGGTTTCCCCGCACAGGTTCGAATCCTGTTCGTGACGCCA,Ser-CGA,67	9	0	0	0	0	13	9	23	0	0	0	3	35.2131	0	0	0	0	84.1604	28.1619	100.251	0	0	0	5.86263
tRF-59:76-Thr-TGT-4-M3	ATCTCGCTGGGGCCTCCA	tRF-3a	-	tRF-18-H9Q867D2	18	tRNA-Thr-TGT-4-1,GGCTCCATAGCTCAGGGGTTAGAGCACTGGTCTTGTAAACCAGGGGTCGCGAGTTCAAATCTCGCTGGGGCCTCCA,Thr-TGT,58;tRNA-Thr-TGT-5-1,GGCCCTATAGCTCAGGGGTTAGAGCACTGGTCTTGTAAACCAGGGGTCGCGAGTTCAAATCTCGCTGGGGCCTCCA,Thr-TGT,58;tRNA-Thr-TGT-6-1,GGCTCCATAGCTCAGGGGTTAGAGCACTGGTCTTGTAAACCAGGGTCGCGAGTTCAAATCTCGCTGGGGCCTCCA,Thr-TGT,57	8	14	41	24	119	17	26	50	38	114	13	24	31.3005	23.6598	114.337	97.2266	802.39	110.056	81.3565	217.937	108.25	739.679	56.9177	46.901
tRF-58:75-Gln-CTG-1-M2	ATCTCGGTGGAACCTCCA	tRF-3a	-	tRF-18-H9R8B7D2	18	tRNA-Gln-CTG-1-1,GGTTCCATGGTGTAATGGTTAGCACTCTGGACTCTGAATCCAGCGATCCGAGTTCAAATCTCGGTGGAACCTCCA,Gln-CTG,57;tRNA-Gln-CTG-5-1,GGTTCCATGGTGTAATGGTTAGCACTCTGGACTCTGAATCCGGTAATCCGAGTTCAAATCTCGGTGGAACCTCCA,Gln-CTG,57	492	388	1211	1356	866	726	2644	1190	952	481	610	470	1924.98	655.713	3377.13	5493.3	5839.24	4700.03	8273.33	5186.9	2711.96	3120.92	2670.75	918.478
tRF-58:75-Gln-CTG-6	ATCTCGGTGGGACCCCCA	tRF-3a	-	-	18	tRNA-Gln-CTG-6-1,GGCCCCATGGTGTAATGGTCAGCACTCTGGACTCTGAATCCAGCGATCCGAGTTCAAATCTCGGTGGGACCCCCA,Gln-CTG,57	2	0	4	8	2	1	28	2	2	4	3	0	7.82512	0	11.1548	32.4089	13.4855	6.47387	87.6147	8.71748	5.69739	25.9536	13.1349	0
tRF-58:75-Gln-TTG-1-M3	ATCTCGGTGGGACCTCCA	tRF-3a	-	tRF-18-H9R8O7D2	18	tRNA-Gln-TTG-1-1,GGTCCCATGGTGTAATGGTTAGCACTCTGGACTTTGAATCCAGCGATCCGAGTTCAAATCTCGGTGGGACCTCCA,Gln-TTG,57;tRNA-Gln-TTG-2-1,GGTCCCATGGTGTAATGGTTAGCACTCTGGACTTTGAATCCAGCAATCCGAGTTCGAATCTCGGTGGGACCTCCA,Gln-TTG,57;tRNA-Gln-TTG-3-1,GGCCCCATGGTGTAATGGTTAGCACTCTGGACTTTGAATCCAGCGATCCGAGTTCAAATCTCGGTGGGACCTCCA,Gln-TTG,57	114	98	236	390	250	328	481	235	354	382	256	112	446.032	165.618	658.135	1579.93	1685.69	2123.43	1505.1	1024.3	1008.44	2478.57	1120.84	218.871
tRF-58:75-Gln-TTG-4	ATCTTGGTGGGACCTCCA	tRF-3a	-	-	18	tRNA-Gln-TTG-4-1,GGTCCCATGGTGTAATGGTTAGCACTCTGGGCTTTGAATCCAGCAATCCGAGTTCGAATCTTGGTGGGACCTCCA,Gln-TTG,57	4	0	4	2	0	4	18	8	18	2	0	0	15.6502	0	11.1548	8.10222	0	25.8955	56.3237	34.8699	51.2765	12.9768	0	0
tRF-58:76-Ala-AGC-10-M5	ATGCCCACATTCTCCACCA	tRF-3b	-	-	19	tRNA-Ala-AGC-10-1,GGGGAATTAGCTCAAGTGGTAGAGCGCTTGCTTAGCACGCAAGAGGTAGTGGGATCGATGCCCACATTCTCCACCA,Ala-AGC,57;tRNA-Ala-AGC-12-1,GGGGAATTAGCTCAAGTGGTAGAGCGCTTGCTTAGCATGCAAGAGGTAGTGGGATCGATGCCCACATTCTCCACCA,Ala-AGC,57;tRNA-Ala-AGC-13-1,GGGGAATTAGCTCAAGCGGTAGAGCGCTTGCTTAGCATGCAAGAGGTAGTGGGATCGATGCCCACATTCTCCACCA,Ala-AGC,57;tRNA-Ala-AGC-14-1,GGGGAATTAGCTCAAGTGGTAGAGCGCTTGCTTAGCATGCAAGAGGTAGTGGGATCAATGCCC…	0	0	0	0	0	0	0	0	0	0	11	0	0	0	0	0	0	0	0	0	0	0	48.1611	0
tRF-58:76-Ala-AGC-8	ATGCCCGCATCCTCCACCA	tRF-3b	-	tRF-19-I1LQ3RE2	19	tRNA-Ala-AGC-8-1,GGGGGATTAGCTCAAATGGTAGAGCGCTCGCTTAGCATGCGAGAGGTAGCGGGATCGATGCCCGCATCCTCCACCA,Ala-AGC,57	1	0	0	0	0	0	26	0	0	0	11	0	3.91256	0	0	0	0	0	81.3565	0	0	0	48.1611	0
tRF-+1:T29-His-GTG-1-3-M1-28:C>T	ATGTCGTTAGTCTAGGCTGTCAGCTCTTT	tRF-1	-	-	29	pre_tRNA-His-GTG-1-3,GCTAGAGCAAGCTCCGCCATCGCGGCTTAGCCTGTGGCTCGCCGTGATCGTATAGTGGTTAGTACTCTGCGTTGTGGCCGCAGCAACCTCGGTTCGAATCCGAGTCACGGCAATGTCGTTAGTCTAGGCTGTCAGCTCTTCCCTTTTGCTCC,His-GTG,112	0	0	0	0	0	0	0	0	0	0	5	0	0	0	0	0	0	0	0	0	0	0	21.8914	0
tRF-+1:T17-Ser-GCT-4-2	ATGTGGTGGCTTACTTT	tRF-1	1005	-	17	pre_tRNA-Ser-GCT-4-2,TATTACTCCCTATAGCAATCAGGAAACAGTAACTTACCGGGACGAGGTGGCCGAGTGGTTAAGGCGATGGACTGCTAATCCATTGTGCTCTGCACGCGTGGGTTCGAATCCCATCCTCGTCGATGTGGTGGCTTACTTTTGCTTGTAACCAAAGTAAATTTG,Ser-GCT,122	0	1	5	18	146	45	0	0	71	0	0	14	0	1.68998	13.9435	72.92	984.444	291.324	0	0	202.257	0	0	27.3589
tRF-+1:T18-Ser-GCT-4-2	ATGTGGTGGCTTACTTTT	tRF-1	-	-	18	pre_tRNA-Ser-GCT-4-2,TATTACTCCCTATAGCAATCAGGAAACAGTAACTTACCGGGACGAGGTGGCCGAGTGGTTAAGGCGATGGACTGCTAATCCATTGTGCTCTGCACGCGTGGGTTCGAATCCCATCCTCGTCGATGTGGTGGCTTACTTTTGCTTGTAACCAAAGTAAATTTG,Ser-GCT,122	0	0	26	0	1	0	0	1	1	76	0	0	0	0	72.5064	0	6.74277	0	0	4.35874	2.84869	493.119	0	0
tRF-56:74-Gly-CCC-1-M2	ATTCCCGGCCAATGCACCA	tRF-3b	-	tRF-19-IRM1DVE2	19	tRNA-Gly-CCC-1-1,GCATTGGTGGTTCAGTGGTAGAATTCTCGCCTCCCACGCGGGAGACCCGGGTTCAATTCCCGGCCAATGCACCA,Gly-CCC,55;tRNA-Gly-GCC-2-1,GCATTGGTGGTTCAGTGGTAGAATTCTCGCCTGCCACGCGGGAGGCCCGGGTTCGATTCCCGGCCAATGCACCA,Gly-GCC,55	4	8	3	18	0	9	2	2	1	5	51	1	15.6502	13.5199	8.36612	72.92	0	58.2649	6.25819	8.71748	2.84869	32.442	223.292	1.95421
tRF-58:76-Tyr-GTA-2-M3	ATTCCGGCTCGAAGGACCA	tRF-3b	-	tRF-19-IR69OKE2	19	tRNA-Tyr-GTA-2-1,CCTTCGATAGCTCAGTTGGTAGAGCGGAGGACTGTAGATCCTTAGGTCGCTGGTTCGATTCCGGCTCGAAGGACCA,Tyr-GTA,57;tRNA-Tyr-GTA-5-1,CCTTCGATAGCTCAGCTGGTAGAGCGGAGGACTGTAGATCCTTAGGTCGCTGGTTCGATTCCGGCTCGAAGGACCA,Tyr-GTA,57;tRNA-Tyr-GTA-7-1,CCTTCGATAGCTCAGCTGGTAGAGCGGAGGACTGTAGATCCTTAGGTCGCTGGTTCAATTCCGGCTCGAAGGACCA,Tyr-GTA,57	37	38	200	81	228	122	104	123	98	240	162	194	144.765	64.2193	557.742	328.14	1537.35	789.813	325.426	536.125	279.172	1557.22	709.282	379.117
tRF-55:75-Trp-CCA-1-M3	CAAATCACGTCGGGGTCACCA	tRF-3b	-	tRF-21-2E2WMK81B	21	tRNA-Trp-CCA-1-1,GGCCTCGTGGCGCAACGGTAGCGCGTCTGACTCCAGATCAGAAGGTTGCGTGTTCAAATCACGTCGGGGTCACCA,Trp-CCA,54;tRNA-Trp-CCA-3-1,GACCTCGTGGCGCAACGGTAGCGCGTCTGACTCCAGATCAGAAGGTTGCGTGTTCAAATCACGTCGGGGTCACCA,Trp-CCA,54;tRNA-Trp-CCA-5-1,GACCTCGTGGCGCAACGGCAGCGCGTCTGACTCCAGATCAGAAGGTTGCGTGTTCAAATCACGTCGGGGTCACCA,Trp-CCA,54	6	5	25	3	18	3	0	0	4	0	42	2	23.4754	8.44991	69.7177	12.1533	121.37	19.4216	0	0	11.3948	0	183.888	3.90842
tRF-55:75-Pro-AGG-1-M7	CAAATCCCGGACGAGCCCCCA	tRF-3b	-	tRF-21-2EK8E0KRB	21	tRNA-Pro-AGG-1-1,GGCTCGTTGGTCTAGGGGTATGATTCTCGCTTAGGATGCGAGAGGTCCCGGGTTCAAATCCCGGACGAGCCCCCA,Pro-AGG,54;tRNA-Pro-AGG-2-1,GGCTCGTTGGTCTAGGGGTATGATTCTCGCTTAGGGTGCGAGAGGTCCCGGGTTCAAATCCCGGACGAGCCCCCA,Pro-AGG,54;tRNA-Pro-CGG-1-1,GGCTCGTTGGTCTAGGGGTATGATTCTCGCTTCGGGTGCGAGAGGTCCCGGGTTCAAATCCCGGACGAGCCCCCA,Pro-CGG,54;tRNA-Pro-CGG-2-1,GGCTCGTTGGTCTAGGGGTATGATTCTCGCTTCGGGTGTGAGAGGTCCCGGGTTCAAATCCCGGACGAGC…	3	5	51	16	20	37	0	19	32	76	15	0	11.7377	8.44991	142.224	64.8177	134.855	239.533	0	82.8161	91.1582	493.119	65.6743	0
tRF-56:76-Thr-TGT-4-M3	CAAATCTCGCTGGGGCCTCCA	tRF-3b	-	tRF-21-2E4V9K3RB	21	tRNA-Thr-TGT-4-1,GGCTCCATAGCTCAGGGGTTAGAGCACTGGTCTTGTAAACCAGGGGTCGCGAGTTCAAATCTCGCTGGGGCCTCCA,Thr-TGT,55;tRNA-Thr-TGT-5-1,GGCCCTATAGCTCAGGGGTTAGAGCACTGGTCTTGTAAACCAGGGGTCGCGAGTTCAAATCTCGCTGGGGCCTCCA,Thr-TGT,55;tRNA-Thr-TGT-6-1,GGCTCCATAGCTCAGGGGTTAGAGCACTGGTCTTGTAAACCAGGGTCGCGAGTTCAAATCTCGCTGGGGCCTCCA,Thr-TGT,54	3	8	20	0	16	15	0	1	0	0	1	2	11.7377	13.5199	55.7742	0	107.884	97.1081	0	4.35874	0	0	4.37828	3.90842
tRF-55:75-Gln-CTG-1-M2	CAAATCTCGGTGGAACCTCCA	tRF-3b	-	tRF-21-2E489B3RB	21	tRNA-Gln-CTG-1-1,GGTTCCATGGTGTAATGGTTAGCACTCTGGACTCTGAATCCAGCGATCCGAGTTCAAATCTCGGTGGAACCTCCA,Gln-CTG,54;tRNA-Gln-CTG-5-1,GGTTCCATGGTGTAATGGTTAGCACTCTGGACTCTGAATCCGGTAATCCGAGTTCAAATCTCGGTGGAACCTCCA,Gln-CTG,54	54	48	95	63	100	46	69	94	17	63	153	18	211.278	81.1192	264.927	255.22	674.277	297.798	215.908	409.722	48.4278	408.77	669.877	35.1758
tRF-55:75-Gln-TTG-1-M2	CAAATCTCGGTGGGACCTCCA	tRF-3b	-	tRF-21-2E48923RB	21	tRNA-Gln-TTG-1-1,GGTCCCATGGTGTAATGGTTAGCACTCTGGACTTTGAATCCAGCGATCCGAGTTCAAATCTCGGTGGGACCTCCA,Gln-TTG,54;tRNA-Gln-TTG-3-1,GGCCCCATGGTGTAATGGTTAGCACTCTGGACTTTGAATCCAGCGATCCGAGTTCAAATCTCGGTGGGACCTCCA,Gln-TTG,54	14	23	64	19	44	80	115	27	19	2	60	24	54.7759	38.8696	178.477	76.9711	296.682	517.91	359.846	117.686	54.1252	12.9768	262.697	46.901
tRF-52:73-chrM.Lys-TTT	CAACACCTCTTTACAGTGACCA	tRF-3b	-	tRF-22-2F37YF7D2	22	chrM.tRNA8-LysTTT,CACTGTAAAGCTAACTTAGCATTAACCTTTTAAGTTAAAGATTAAGAGAACCAACACCTCTTTACAGTGACCA,Lys-TTT,51	0	0	0	0	0	8	0	0	0	0	0	0	0	0	0	0	0	51.791	0	0	0	0	0	0
tRF-55:75-Trp-CCA-2	CAAGTCACGTCGGGGTCACCA	tRF-3b	-	tRF-21-232WMK81B	21	tRNA-Trp-CCA-2-1,GACCTCGTGGCGCAATGGTAGCGCGTCTGACTCCAGATCAGAAGGTTGCGTGTTCAAGTCACGTCGGGGTCACCA,Trp-CCA,54	0	1	37	0	21	0	0	0	0	0	0	1	0	1.68998	103.182	0	141.598	0	0	0	0	0	0	1.95421
tRF-55:75-Gln-CTG-2	CAAGTCTCGGTGGAACCTCCA	tRF-3b	-	-	21	tRNA-Gln-CTG-2-1,GGTTCCATGGTGTAATGGTTAGCACTCTGGACTCTGAATCCAGCGATCCGAGTTCAAGTCTCGGTGGAACCTCCA,Gln-CTG,54	1	0	1	0	0	0	0	2	5	0	5	3	3.91256	0	2.78871	0	0	0	0	8.71748	14.2435	0	21.8914	5.86263
tRF-53:71-chrM.Trp-TCA	CAATACTTAATTTCTGCCA	tRF-3b	-	tRF-19-2LNOZ7I2	19	chrM.tRNA6-TrpTCA,AGAAATTTAGGTTAAATACAGACCAAGAGCCTTCAAAGCCCTCAGTAAGTTGCAATACTTAATTTCTGCCA,Trp-TCA,52	3	0	0	0	0	1	45	0	0	0	0	0	11.7377	0	0	0	0	6.47387	140.809	0	0	0	0	0
tRF-55:75-Ala-AGC-2-M2	CAATCCCCGGCACCTCCACCA	tRF-3b	-	tRF-21-2MK827K1B	21	tRNA-Ala-AGC-2-1,GGGGGTGTAGCTCAGTGGTAGAGCGCGTGCTTAGCATGCACGAGGCCCCGGGTTCAATCCCCGGCACCTCCACCA,Ala-AGC,54;tRNA-Ala-AGC-3-1,GGGGGTGTAGCTCAGTGGTAGAGCGCGTGCTTAGCATGTACGAGGTCCCGGGTTCAATCCCCGGCACCTCCACCA,Ala-AGC,54	1	0	0	0	0	0	0	7	0	0	0	2	3.91256	0	0	0	0	0	0	30.5112	0	0	0	3.90842
tRF-1:15-chrM.Lys-TTT	CACTGTAAAGCTAAC	tRF-5a	-	-	15	chrM.tRNA8-LysTTT,CACTGTAAAGCTAACTTAGCATTAACCTTTTAAGTTAAAGATTAAGAGAACCAACACCTCTTTACAGTGACCA,Lys-TTT,0	19	12	32	1	0	0	0	1	11	0	0	0	74.3387	20.2798	89.2387	4.05111	0	0	0	4.35874	31.3356	0	0	0
tRF-1:16-chrM.Lys-TTT	CACTGTAAAGCTAACT	tRF-5a	-	tRF-16-2YU04DE	16	chrM.tRNA8-LysTTT,CACTGTAAAGCTAACTTAGCATTAACCTTTTAAGTTAAAGATTAAGAGAACCAACACCTCTTTACAGTGACCA,Lys-TTT,0	0	6	2	1	0	0	0	5	0	1	0	3	0	10.1399	5.57742	4.05111	0	0	0	21.7937	0	6.48841	0	5.86263
tRF-1:24-chrM.Lys-TTT	CACTGTAAAGCTAACTTAGCATTA	tRF-5b	-	-	24	chrM.tRNA8-LysTTT,CACTGTAAAGCTAACTTAGCATTAACCTTTTAAGTTAAAGATTAAGAGAACCAACACCTCTTTACAGTGACCA,Lys-TTT,0	0	1	11	0	0	0	0	1	9	2	0	0	0	1.68998	30.6758	0	0	0	0	4.35874	25.6382	12.9768	0	0
tRF-1:15-chrM.Val-TAC	CAGAGTGTAGCTTAA	tRF-5a	-	-	15	chrM.tRNA2-ValTAC,CAGAGTGTAGCTTAACACAAAGCACCCAACTTACACTTAGGAGATTTCAACTTAACTTGACCGCTCTGACCA,Val-TAC,0	5	0	0	0	42	0	0	0	0	0	0	0	19.5628	0	0	0	283.196	0	0	0	0	0	0	0
tRF-1:16-chrM.Val-TAC	CAGAGTGTAGCTTAAC	tRF-5a	-	tRF-16-J09PNOD	16	chrM.tRNA2-ValTAC,CAGAGTGTAGCTTAACACAAAGCACCCAACTTACACTTAGGAGATTTCAACTTAACTTGACCGCTCTGACCA,Val-TAC,0	38	14	70	25	64	50	1	8	28	3	4	0	148.677	23.6598	195.21	101.278	431.537	323.694	3.1291	34.8699	79.7634	19.4652	17.5131	0
tRF-1:28-chrM.Val-TAC	CAGAGTGTAGCTTAACACAAAGCACCCA	tRF-5c	-	tRF-28-J09PNO2OF5D2	28	chrM.tRNA2-ValTAC,CAGAGTGTAGCTTAACACAAAGCACCCAACTTACACTTAGGAGATTTCAACTTAACTTGACCGCTCTGACCA,Val-TAC,0	0	0	0	0	0	0	0	0	0	4	0	0	0	0	0	0	0	0	0	0	0	25.9536	0	0
tRF-60:76-Lys-CTT-1-M4	CCCCACGTTGGGCGCCA	tRF-3a	-	tRF-17-K6MY6V2	17	tRNA-Lys-CTT-1-1,GCCCGGCTAGCTCAGTCGGTAGAGCATGGGACTCTTAATCCCAGGGTCGTGGGTTCGAGCCCCACGTTGGGCGCCA,Lys-CTT,59;tRNA-Lys-CTT-2-1,GCCCGGCTAGCTCAGTCGGTAGAGCATGAGACTCTTAATCTCAGGGTCGTGGGTTCGAGCCCCACGTTGGGCGCCA,Lys-CTT,59;tRNA-Lys-CTT-3-1,GCCCGGCTAGCTCAGTCGGTAGAGCATGAGACCCTTAATCTCAGGGTCGTGGGTTCGAGCCCCACGTTGGGCGCCA,Lys-CTT,59;tRNA-Lys-CTT-4-1,GCCCGGCTAGCTCAGTCGGTAGAGCATGGGACTCTTAATCTCAGGGTCGTGGGTTCGAGCCCCACGT…	1	14	9	0	0	35	48	2	26	50	0	0	3.91256	23.6598	25.0984	0	0	226.586	150.197	8.71748	74.0661	324.42	0	0
tRF-59:75-Val-AAC-6	CCCCAGCACTTCCACCA	tRF-3a	-	-	17	tRNA-Val-AAC-6-1,GGGGGTGTAGCTCAGTGGTAGAGCGTATGCTTAACATTCATGAGGCTCTGGGTTCGATCCCCAGCACTTCCACCA,Val-AAC,58	0	0	0	0	0	0	0	0	0	0	15	0	0	0	0	0	0	0	0	0	0	0	65.6743	0
tRF-59:75-Ala-AGC-4	CCCCAGCATCTCCACCA	tRF-3a	-	tRF-17-K6PM852	17	tRNA-Ala-AGC-4-1,GGGGATGTAGCTCAGTGGTAGAGCGCATGCTTAGCATGCATGAGGTCCCGGGTTCGATCCCCAGCATCTCCACCA,Ala-AGC,58	0	0	0	0	0	0	0	0	1	60	0	1	0	0	0	0	0	0	0	0	2.84869	389.305	0	1.95421
tRF-60:76-Val-TAC-1-M3	CCCCAGTGGAACCACCA	tRF-3a	-	tRF-17-K672052	17	tRNA-Val-TAC-1-1,GGTTCCATAGTGTAGTGGTTATCACGTCTGCTTTACACGCAGAAGGTCCTGGGTTCGAGCCCCAGTGGAACCACCA,Val-TAC,59;tRNA-Val-TAC-2-1,GGTTCCATAGTGTAGCGGTTATCACGTCTGCTTTACACGCAGAAGGTCCTGGGTTCGAGCCCCAGTGGAACCACCA,Val-TAC,59;tRNA-Val-TAC-3-1,GGTTCCATAGTGTAGTGGTTATCACATCTGCTTTACACGCAGAAGGTCCTGGGTTCAAGCCCCAGTGGAACCACCA,Val-TAC,59	10	3	9	0	0	13	15	36	10	0	0	14	39.1256	5.06995	25.0984	0	0	84.1604	46.9365	156.915	28.4869	0	0	27.3589
tRF-59:75-Ala-AGC-2-M4	CCCCGGCACCTCCACCA	tRF-3a	-	tRF-17-KSP1852	17	tRNA-Ala-AGC-2-1,GGGGGTGTAGCTCAGTGGTAGAGCGCGTGCTTAGCATGCACGAGGCCCCGGGTTCAATCCCCGGCACCTCCACCA,Ala-AGC,58;tRNA-Ala-AGC-3-1,GGGGGTGTAGCTCAGTGGTAGAGCGCGTGCTTAGCATGTACGAGGTCCCGGGTTCAATCCCCGGCACCTCCACCA,Ala-AGC,58;tRNA-Ala-TGC-1-1,GGGGGTGTAGCTCAGTGGTAGAGCGCATGCTTTGCATGTATGAGGTCCCGGGTTCGATCCCCGGCACCTCCACCA,Ala-TGC,58;tRNA-Ala-TGC-6-1,GGGGGTGTAGCTCAGTGGTAGAGCACATGCTTTGCATGTGTGAGGCCCCGGGTTCGATCCCCGGCACCTC…	0	10	8	0	0	6	0	0	1	1	66	0	0	16.8998	22.3097	0	0	38.8432	0	0	2.84869	6.48841	288.967	0
tRF-59:75-Ala-CGC-1-M6	CCCCGGCATCTCCACCA	tRF-3a	-	tRF-17-KSPM852	17	tRNA-Ala-CGC-1-1,GGGGATGTAGCTCAGTGGTAGAGCGCATGCTTCGCATGTATGAGGTCCCGGGTTCGATCCCCGGCATCTCCACCA,Ala-CGC,58;tRNA-Ala-CGC-2-1,GGGGATGTAGCTCAGTGGTAGAGCGCATGCTTCGCATGTATGAGGCCCCGGGTTCGATCCCCGGCATCTCCACCA,Ala-CGC,58;tRNA-Ala-CGC-3-1,GGGGATGTAGCTCAGTGGTAGAGCGCGCGCTTCGCATGTGTGAGGTCCCGGGTTCAATCCCCGGCATCTCCACCA,Ala-CGC,58;tRNA-Ala-TGC-2-1,GGGGATGTAGCTCAGTGGTAGAGCGCATGCTTTGCATGTATGAGGTCCCGGGTTCGATCCCCGGCATCTC…	5	1	8	15	1	6	26	43	0	40	76	0	19.5628	1.68998	22.3097	60.7666	6.74277	38.8432	81.3565	187.426	0	259.536	332.75	0
tRF-61:77-Ile-AAT-1-M5	CCCCGTACGGGCCACCA	tRF-3a	-	tRF-17-KSU8P52	17	tRNA-Ile-AAT-1-1,GGCCGGTTAGCTCAGTTGGTTAGAGCGTGGCGCTAATAACGCCAAGGTCGCGGGTTCGATCCCCGTACGGGCCACCA,Ile-AAT,60;tRNA-Ile-AAT-4-1,GGCCGGTTAGCTCAGTTGGTTAGAGCGTGGTGCTAATAACGCCAAGGTCGCGGGTTCGAACCCCGTACGGGCCACCA,Ile-AAT,60;tRNA-Ile-AAT-5-1,GGCCGGTTAGCTCAGTTGGTTAGAGCGTGGTGCTAATAACGCCAAGGTCGCGGGTTCGATCCCCGTACGGGCCACCA,Ile-AAT,60;tRNA-Ile-AAT-7-1,GGCCGGTTAGCTCAGTTGGTCAGAGCGTGGTGCTAATAACGCCAAGGTCGCGGGTTCGATCCCC…	2	6	35	32	58	36	11	1	4	2	0	37	7.82512	10.1399	97.6048	129.635	391.081	233.059	34.4201	4.35874	11.3948	12.9768	0	72.3057
tRF-60:76-Val-CAC-3	CCCGGGCGGAAACACCA	tRF-3a	-	tRF-17-K8Q2B52	17	tRNA-Val-CAC-3-1,GTTTCCGTAGTGTAGCGGTTATCACATTCGCCTCACACGCGAAAGGTCCCCGGTTCGATCCCGGGCGGAAACACCA,Val-CAC,59	4	6	7	0	6	17	37	2	3	4	0	4	15.6502	10.1399	19.521	0	40.4566	110.056	115.777	8.71748	8.54608	25.9536	0	7.81684
tRF-60:76-Phe-GAA-1-M4	CCCGGGTTTCGGCACCA	tRF-3a	3023a	tRF-17-K879652	17	tRNA-Phe-GAA-1-1,GCCGAAATAGCTCAGTTGGGAGAGCGTTAGACTGAAGATCTAAAGGTCCCTGGTTCGATCCCGGGTTTCGGCACCA,Phe-GAA,59;tRNA-Phe-GAA-2-1,GCCGAAATAGCTCAGTTGGGAGAGCGTTAGACTGAAGATCTAAAGGTCCCTGGTTCAATCCCGGGTTTCGGCACCA,Phe-GAA,59;tRNA-Phe-GAA-3-1,GCCGAGATAGCTCAGTTGGGAGAGCGTTAGACTGAAGATCTAAAGGTCCCTGGTTCAATCCCGGGTTTCGGCACCA,Phe-GAA,59;tRNA-Phe-GAA-4-1,GCCGAAATAGCTCAGTTGGGAGAGCGTTAGACCGAAGATCTTAAAGGTCCCTGGTTCAATCCCGGGT…	0	0	29	0	0	1	0	2	0	1	19	30	0	0	80.8725	0	0	6.47387	0	8.71748	0	6.48841	83.1874	58.6263
tRF-69:85-Ser-TGA-1	CCCTGCTCGCTGCGCCA	tRF-3a	-	tRF-17-KY4VXV2	17	tRNA-Ser-TGA-1-1,GCAGCGATGGCCGAGTGGTTAAGGCGTTGGACTTGAAATCCAATGGGGTCTCCCCGCGCAGGTTCGAACCCTGCTCGCTGCGCCA,Ser-TGA,68	0	0	12	0	0	0	16	0	0	0	0	0	0	0	33.4645	0	0	0	50.0656	0	0	0	0	0
tRF-61:77-Ile-TAT-1-M3	CCTCACCTGGAGCACCA	tRF-3a	-	-	17	tRNA-Ile-TAT-1-1,GCTCCAGTGGCGCAATCGGTTAGCGCGCGGTACTTATAATGCCGAGGTTGTGAGTTCGATCCTCACCTGGAGCACCA,Ile-TAT,60;tRNA-Ile-TAT-2-1,GCTCCAGTGGCGCAATCGGTTAGCGCGCGGTACTTATAATGCCGAGGTTGTGAGTTCGAGCCTCACCTGGAGCACCA,Ile-TAT,60;tRNA-Ile-TAT-3-1,GCTCCAGTGGCGCAATCGGTTAGCGCGCGGTACTTATAATGCCGAGGTTGTGAGTTCAAGCCTCACCTGGAGCACCA,Ile-TAT,60	3	0	16	0	0	0	1	0	0	1	42	0	11.7377	0	44.6193	0	0	0	3.1291	0	0	6.48841	183.888	0
tRF-+1:T14-Val-CAC-1-4	CCTCCTTCTGCTTT	tRF-1	-	-	14	pre_tRNA-Val-CAC-1-4,GTGTGGTGGCTCATTGTGATGGCACAGGTATCCCATGCAGGTTTCCGTAGTGTAGTGGTTATCACGTTCGCCTCACACGCGAAAGGTCCCCGGTTCGAAACCGGGCGGAAACACCTCCTTCTGCTTTTTACCTCATTATCTCAGATTTGTTAC,Val-CAC,113	0	0	9	0	0	0	0	0	0	0	35	0	0	0	25.0984	0	0	0	0	0	0	0	153.24	0
tRF-+1:T15-Val-CAC-1-4	CCTCCTTCTGCTTTT	tRF-1	-	-	15	pre_tRNA-Val-CAC-1-4,GTGTGGTGGCTCATTGTGATGGCACAGGTATCCCATGCAGGTTTCCGTAGTGTAGTGGTTATCACGTTCGCCTCACACGCGAAAGGTCCCCGGTTCGAAACCGGGCGGAAACACCTCCTTCTGCTTTTTACCTCATTATCTCAGATTTGTTAC,Val-CAC,113	0	0	0	13	0	0	0	0	0	0	0	0	0	0	0	52.6644	0	0	0	0	0	0	0	0
tRF-60:76-Thr-TGT-2	CCTCGCTGGGGCCTCCA	tRF-3a	-	tRF-17-3SNKP92	17	tRNA-Thr-TGT-2-1,GGCTCCATAGCTCAGTGGTTAGAGCACTGGTCTTGTAAACCAGGGGTCGCGAGTTCGATCCTCGCTGGGGCCTCCA,Thr-TGT,59	0	0	1	0	2	0	18	2	3	0	1	2	0	0	2.78871	0	13.4855	0	56.3237	8.71748	8.54608	0	4.37828	3.90842
tRF-+1:T16-Thr-TGT-2	CCTGTTGGCTTACTTT	tRF-1	-	-	16	pre_tRNA-Thr-TGT-2-1,TGGTAAGATCTGTGAATTCCTGAAAACAACGCCTCACGTGGGCTCCATAGCTCAGTGGTTAGAGCACTGGTCTTGTAAACCAGGGGTCGCGAGTTCGATCCTCGCTGGGGCCTCCTGTTGGCTTACTTTTATTTTAATCCATAGCATTTAAAT,Thr-TGT,113	5	0	30	28	72	28	0	8	74	31	96	0	19.5628	0	83.6612	113.431	485.479	181.268	0	34.8699	210.803	201.141	420.315	0
tRF-+1:T17-Thr-TGT-2	CCTGTTGGCTTACTTTT	tRF-1	-	-	17	pre_tRNA-Thr-TGT-2-1,TGGTAAGATCTGTGAATTCCTGAAAACAACGCCTCACGTGGGCTCCATAGCTCAGTGGTTAGAGCACTGGTCTTGTAAACCAGGGGTCGCGAGTTCGATCCTCGCTGGGGCCTCCTGTTGGCTTACTTTTATTTTAATCCATAGCATTTAAAT,Thr-TGT,113	0	11	1	0	3	5	32	11	2	1	0	0	0	18.5898	2.78871	0	20.2283	32.3694	100.131	47.9462	5.69739	6.48841	0	0
tRF-1:14-Tyr-GTA-1-M7	CCTTCGATAGCTCA	tRF-5a	-	-	14	tRNA-Tyr-GTA-1-1,CCTTCGATAGCTCAGTTGGTAGAGCGGAGGACTGTAGATCCTTAGGTCGCTGGTTCGAATCCGGCTCGAAGGACCA,Tyr-GTA,0;tRNA-Tyr-GTA-2-1,CCTTCGATAGCTCAGTTGGTAGAGCGGAGGACTGTAGATCCTTAGGTCGCTGGTTCGATTCCGGCTCGAAGGACCA,Tyr-GTA,0;tRNA-Tyr-GTA-3-1,CCTTCGATAGCTCAGTTGGTAGAGCGGAGGACTGTAGATCCTTAGGTCGCTGGTTCGAATCCGGCTCGGAGGACCA,Tyr-GTA,0;tRNA-Tyr-GTA-4-1,CCTTCGATAGCTCAGCTGGTAGAGCGGAGGACTGTAGATCCTTAGGTCGCTGGTTCGATTCCAGCTCGAA…	0	0	21	0	0	0	0	0	0	0	0	0	0	0	58.5629	0	0	0	0	0	0	0	0	0
tRF-1:15-Tyr-GTA-1-M7	CCTTCGATAGCTCAG	tRF-5a	5001a	-	15	tRNA-Tyr-GTA-1-1,CCTTCGATAGCTCAGTTGGTAGAGCGGAGGACTGTAGATCCTTAGGTCGCTGGTTCGAATCCGGCTCGAAGGACCA,Tyr-GTA,0;tRNA-Tyr-GTA-2-1,CCTTCGATAGCTCAGTTGGTAGAGCGGAGGACTGTAGATCCTTAGGTCGCTGGTTCGATTCCGGCTCGAAGGACCA,Tyr-GTA,0;tRNA-Tyr-GTA-3-1,CCTTCGATAGCTCAGTTGGTAGAGCGGAGGACTGTAGATCCTTAGGTCGCTGGTTCGAATCCGGCTCGGAGGACCA,Tyr-GTA,0;tRNA-Tyr-GTA-4-1,CCTTCGATAGCTCAGCTGGTAGAGCGGAGGACTGTAGATCCTTAGGTCGCTGGTTCGATTCCAGCTCGAA…	0	0	0	0	0	0	0	15	21	0	0	0	0	0	0	0	0	0	0	65.3811	59.8226	0	0	0
tRF-1:16-Tyr-GTA-4-M4	CCTTCGATAGCTCAGC	tRF-5a	-	-	16	tRNA-Tyr-GTA-4-1,CCTTCGATAGCTCAGCTGGTAGAGCGGAGGACTGTAGATCCTTAGGTCGCTGGTTCGATTCCAGCTCGAAGGACCA,Tyr-GTA,0;tRNA-Tyr-GTA-5-1,CCTTCGATAGCTCAGCTGGTAGAGCGGAGGACTGTAGATCCTTAGGTCGCTGGTTCGATTCCGGCTCGAAGGACCA,Tyr-GTA,0;tRNA-Tyr-GTA-6-1,CCTTCGATAGCTCAGCTGGTAGAGCGGAGGACTGTAGATCCTTAGGTCGCTGGTTCGAATCCGGCTCGGAGGACCA,Tyr-GTA,0;tRNA-Tyr-GTA-7-1,CCTTCGATAGCTCAGCTGGTAGAGCGGAGGACTGTAGATCCTTAGGTCGCTGGTTCAATTCCGGCTCGAA…	1	0	12	1	0	11	0	12	2	218	1	50	3.91256	0	33.4645	4.05111	0	71.2126	0	52.3049	5.69739	1414.47	4.37828	97.7104
tRF-1:23-Tyr-GTA-4-M4	CCTTCGATAGCTCAGCTGGTAGA	tRF-5b	-	tRF-23-395P4PN3X	23	tRNA-Tyr-GTA-4-1,CCTTCGATAGCTCAGCTGGTAGAGCGGAGGACTGTAGATCCTTAGGTCGCTGGTTCGATTCCAGCTCGAAGGACCA,Tyr-GTA,0;tRNA-Tyr-GTA-5-1,CCTTCGATAGCTCAGCTGGTAGAGCGGAGGACTGTAGATCCTTAGGTCGCTGGTTCGATTCCGGCTCGAAGGACCA,Tyr-GTA,0;tRNA-Tyr-GTA-6-1,CCTTCGATAGCTCAGCTGGTAGAGCGGAGGACTGTAGATCCTTAGGTCGCTGGTTCGAATCCGGCTCGGAGGACCA,Tyr-GTA,0;tRNA-Tyr-GTA-7-1,CCTTCGATAGCTCAGCTGGTAGAGCGGAGGACTGTAGATCCTTAGGTCGCTGGTTCAATTCCGGCTCGAA…	4	2	19	19	32	13	0	0	1	1	0	0	15.6502	3.37997	52.9855	76.9711	215.769	84.1604	0	0	2.84869	6.48841	0	0
tRF-1:24-Tyr-GTA-4-M4	CCTTCGATAGCTCAGCTGGTAGAG	tRF-5b	-	tRF-24-395P4PN3ES	24	tRNA-Tyr-GTA-4-1,CCTTCGATAGCTCAGCTGGTAGAGCGGAGGACTGTAGATCCTTAGGTCGCTGGTTCGATTCCAGCTCGAAGGACCA,Tyr-GTA,0;tRNA-Tyr-GTA-5-1,CCTTCGATAGCTCAGCTGGTAGAGCGGAGGACTGTAGATCCTTAGGTCGCTGGTTCGATTCCGGCTCGAAGGACCA,Tyr-GTA,0;tRNA-Tyr-GTA-6-1,CCTTCGATAGCTCAGCTGGTAGAGCGGAGGACTGTAGATCCTTAGGTCGCTGGTTCGAATCCGGCTCGGAGGACCA,Tyr-GTA,0;tRNA-Tyr-GTA-7-1,CCTTCGATAGCTCAGCTGGTAGAGCGGAGGACTGTAGATCCTTAGGTCGCTGGTTCAATTCCGGCTCGAA…	0	0	0	0	0	0	0	22	0	0	0	0	0	0	0	0	0	0	0	95.8923	0	0	0	0
tRF-1:16-Tyr-GTA-1-M3	CCTTCGATAGCTCAGT	tRF-5a	-	-	16	tRNA-Tyr-GTA-1-1,CCTTCGATAGCTCAGTTGGTAGAGCGGAGGACTGTAGATCCTTAGGTCGCTGGTTCGAATCCGGCTCGAAGGACCA,Tyr-GTA,0;tRNA-Tyr-GTA-2-1,CCTTCGATAGCTCAGTTGGTAGAGCGGAGGACTGTAGATCCTTAGGTCGCTGGTTCGATTCCGGCTCGAAGGACCA,Tyr-GTA,0;tRNA-Tyr-GTA-3-1,CCTTCGATAGCTCAGTTGGTAGAGCGGAGGACTGTAGATCCTTAGGTCGCTGGTTCGAATCCGGCTCGGAGGACCA,Tyr-GTA,0	2	0	2	0	0	1	0	3	0	43	0	6	7.82512	0	5.57742	0	0	6.47387	0	13.0762	0	279.002	0	11.7253
tRF-1:23-Tyr-GTA-1-M3	CCTTCGATAGCTCAGTTGGTAGA	tRF-5b	-	tRF-23-395P4PZ3X	23	tRNA-Tyr-GTA-1-1,CCTTCGATAGCTCAGTTGGTAGAGCGGAGGACTGTAGATCCTTAGGTCGCTGGTTCGAATCCGGCTCGAAGGACCA,Tyr-GTA,0;tRNA-Tyr-GTA-2-1,CCTTCGATAGCTCAGTTGGTAGAGCGGAGGACTGTAGATCCTTAGGTCGCTGGTTCGATTCCGGCTCGAAGGACCA,Tyr-GTA,0;tRNA-Tyr-GTA-3-1,CCTTCGATAGCTCAGTTGGTAGAGCGGAGGACTGTAGATCCTTAGGTCGCTGGTTCGAATCCGGCTCGGAGGACCA,Tyr-GTA,0	2	0	0	5	0	0	0	1	1	0	0	1	7.82512	0	0	20.2555	0	0	0	4.35874	2.84869	0	0	1.95421
tRF-1:24-Tyr-GTA-1-M3	CCTTCGATAGCTCAGTTGGTAGAG	tRF-5b	-	tRF-24-395P4PZ3ES	24	tRNA-Tyr-GTA-1-1,CCTTCGATAGCTCAGTTGGTAGAGCGGAGGACTGTAGATCCTTAGGTCGCTGGTTCGAATCCGGCTCGAAGGACCA,Tyr-GTA,0;tRNA-Tyr-GTA-2-1,CCTTCGATAGCTCAGTTGGTAGAGCGGAGGACTGTAGATCCTTAGGTCGCTGGTTCGATTCCGGCTCGAAGGACCA,Tyr-GTA,0;tRNA-Tyr-GTA-3-1,CCTTCGATAGCTCAGTTGGTAGAGCGGAGGACTGTAGATCCTTAGGTCGCTGGTTCGAATCCGGCTCGGAGGACCA,Tyr-GTA,0	0	0	14	0	0	0	0	0	0	0	0	0	0	0	39.0419	0	0	0	0	0	0	0	0	0
tRF-55:75-iMet-CAT-1	CGAAACCATCCTCTGCTACCA	tRF-3b	-	tRF-21-LBKM4Y41B	21	tRNA-iMet-CAT-1-1,AGCAGAGTGGCGCAGCGGAAGCGTGCTGGGCCCATAACCCAGAGGTCGATGGATCGAAACCATCCTCTGCTACCA,iMet-CAT,54	0	0	21	0	0	12	1	2	1	0	8	4	0	0	58.5629	0	0	77.6865	3.1291	8.71748	2.84869	0	35.0263	7.81684
tRF-56:76-Val-AAC-5	CGAAACCGGGCAGAAACACCA	tRF-3b	-	-	21	tRNA-Val-AAC-5-1,GTTTCCGTAGTGTAGTGGTTATCACGTTTGCCTAACACGCGAAAGGTCCCCGGTTCGAAACCGGGCAGAAACACCA,Val-AAC,55	0	0	12	0	0	0	0	0	0	0	1	0	0	0	33.4645	0	0	0	0	0	0	0	4.37828	0
tRF-56:76-Val-AAC-1-M5	CGAAACCGGGCGGAAACACCA	tRF-3b	-	tRF-21-LB3KMB01B	21	tRNA-Val-AAC-1-1,GTTTCCGTAGTGTAGTGGTTATCACGTTCGCCTAACACGCGAAAGGTCCCCGGTTCGAAACCGGGCGGAAACACCA,Val-AAC,55;tRNA-Val-AAC-2-1,GTTTCCGTAGTGTAGTGGTCATCACGTTCGCCTAACACGCGAAAGGTCCCCGGTTCGAAACCGGGCGGAAACACCA,Val-AAC,55;tRNA-Val-AAC-4-1,GTTTCCGTAGTGTAGTGGTTATCACGTTCGCCTAACACGCGAAAGGTCCGCGGTTCGAAACCGGGCGGAAACACCA,Val-AAC,55;tRNA-Val-CAC-1-1,GTTTCCGTAGTGTAGTGGTTATCACGTTCGCCTCACACGCGAAAGGTCCCCGGTTCGAAACCGGGCG…	8	10	25	13	62	19	16	1	14	2	60	26	31.3005	16.8998	69.7177	52.6644	418.052	123.004	50.0656	4.35874	39.8817	12.9768	262.697	50.8094
tRF-55:75-Trp-CCA-4	CGAATCACGTCGGGGTCACCA	tRF-3b	-	tRF-21-LE2WMK81B	21	tRNA-Trp-CCA-4-1,GACCTCGTGGCGCAACGGTAGCGCGTCTGACTCCAGATCAGAAGGCTGCGTGTTCGAATCACGTCGGGGTCACCA,Trp-CCA,54	0	0	18	0	16	25	0	6	1	0	0	1	0	0	50.1967	0	107.884	161.847	0	26.1525	2.84869	0	0	1.95421
tRF-65:85-Leu-AAG-1-M4	CGAATCCCACCGCTGCCACCA	tRF-3b	-	tRF-21-LEK5LYK1B	21	tRNA-Leu-AAG-1-1,GGTAGCGTGGCCGAGCGGTCTAAGGCGCTGGATTAAGGCTCCAGTCTCTTCGGAGGCGTGGGTTCGAATCCCACCGCTGCCACCA,Leu-AAG,64;tRNA-Leu-AAG-2-1,GGTAGCGTGGCCGAGCGGTCTAAGGCGCTGGATTAAGGCTCCAGTCTCTTCGGGGGCGTGGGTTCGAATCCCACCGCTGCCACCA,Leu-AAG,64;tRNA-Leu-TAG-1-1,GGTAGCGTGGCCGAGCGGTCTAAGGCGCTGGATTTAGGCTCCAGTCTCTTCGGAGGCGTGGGTTCGAATCCCACCGCTGCCACCA,Leu-TAG,64;tRNA-Leu-TAG-3-1,GGTAGCGTGGCCGAGTGGTCTAAGGCGCTGGATTTAGGCT…	0	0	8	0	0	0	0	0	18	1	1	0	0	0	22.3097	0	0	0	0	0	51.2765	6.48841	4.37828	0
tRF-66:86-Leu-CAG-1	CGAATCCCACTCCTGACACCA	tRF-3b	-	tRF-21-LEK58Y01B	21	tRNA-Leu-CAG-1-1,GTCAGGATGGCCGAGCGGTCTAAGGCGCTGCGTTCAGGTCGCAGTCTCCCCTGGAGGCGTGGGTTCGAATCCCACTCCTGACACCA,Leu-CAG,65	0	0	7	0	0	0	0	0	0	0	73	0	0	0	19.521	0	0	0	0	0	0	0	319.615	0
tRF-66:86-Leu-CAA-1-M5	CGAATCCCACTTCTGACACCA	tRF-3b	-	tRF-21-LEK5YY01B	21	tRNA-Leu-CAA-1-1,GTCAGGATGGCCGAGTGGTCTAAGGCGCCAGACTCAAGTTCTGGTCTCCAATGGAGGCGTGGGTTCGAATCCCACTTCTGACACCA,Leu-CAA,65;tRNA-Leu-CAA-2-1,GTCAGGATGGCCGAGTGGTCTAAGGCGCCAGACTCAAGTTCTGGTCTCCGTATGGAGGCGTGGGTTCGAATCCCACTTCTGACACCA,Leu-CAA,66;tRNA-Leu-CAA-3-1,GTCAGGATGGCCGAGTGGTCTAAGGCGCCAGACTCAAGTTCTGGTCTCCGCATGGAGGCGTGGGTTCGAATCCCACTTCTGACACCA,Leu-CAA,66;tRNA-Leu-CAA-4-1,GTCAGGATGGCCGAGTGGTCTAAGGCGCCAGACTC…	3	2	16	6	16	3	0	2	1	1	38	3	11.7377	3.37997	44.6193	24.3067	107.884	19.4216	0	8.71748	2.84869	6.48841	166.375	5.86263
tRF-57:77-Thr-AGT-1-M2	CGAATCCCAGCGGTGCCTCCA	tRF-3b	-	tRF-21-LEKPM43RB	21	tRNA-Thr-AGT-1-1,GGCGCCGTGGCTTAGTTGGTTAAAGCGCCTGTCTAGTAAACAGGAGATCCTGGGTTCGAATCCCAGCGGTGCCTCCA,Thr-AGT,56;tRNA-Thr-AGT-5-1,GGCGCCGTGGCTTAGCTGGTTAAAGCGCCTGTCTAGTAAACAGGAGATCCTGGGTTCGAATCCCAGCGGTGCCTCCA,Thr-AGT,56	0	0	0	9	0	0	0	18	1	1	1	0	0	0	0	36.46	0	0	0	78.4574	2.84869	6.48841	4.37828	0
tRF-56:76-Tyr-GTA-1-M2	CGAATCCGGCTCGAAGGACCA	tRF-3b	-	tRF-21-LE3JWB61B	21	tRNA-Tyr-GTA-1-1,CCTTCGATAGCTCAGTTGGTAGAGCGGAGGACTGTAGATCCTTAGGTCGCTGGTTCGAATCCGGCTCGAAGGACCA,Tyr-GTA,55;tRNA-Tyr-GTA-8-1,CTTTCGATAGCTCAGTTGGTAGAGCGGAGGACTGTAGATCCTTAGGTCGCTGGTTCGAATCCGGCTCGAAGGACCA,Tyr-GTA,55	3	0	1	0	17	2	0	0	28	2	92	0	11.7377	0	2.78871	0	114.627	12.9477	0	0	79.7634	12.9768	402.802	0
tRF-56:76-Tyr-GTA-3-M2	CGAATCCGGCTCGGAGGACCA	tRF-3b	-	tRF-21-LE3JW261B	21	tRNA-Tyr-GTA-3-1,CCTTCGATAGCTCAGTTGGTAGAGCGGAGGACTGTAGATCCTTAGGTCGCTGGTTCGAATCCGGCTCGGAGGACCA,Tyr-GTA,55;tRNA-Tyr-GTA-6-1,CCTTCGATAGCTCAGCTGGTAGAGCGGAGGACTGTAGATCCTTAGGTCGCTGGTTCGAATCCGGCTCGGAGGACCA,Tyr-GTA,55	7	0	22	0	0	0	0	1	0	1	3	1	27.3879	0	61.3516	0	0	0	0	4.35874	0	6.48841	13.1349	1.95421
tRF-65:85-Ser-TGA-4	CGAATCCTGTCGGCTACGCCA	tRF-3b	-	-	21	tRNA-Ser-TGA-4-1,GTAGTCGTGGCCGAGTGGTTAAGGCGATGGACTTGAAATCCATTGGGGTTTCCCCGCGCAGGTTCGAATCCTGTCGGCTACGCCA,Ser-TGA,64	0	0	0	0	0	0	0	22	0	0	2	0	0	0	0	0	0	0	0	95.8923	0	0	8.75657	0
tRF-55:75-Gln-TTG-2	CGAATCTCGGTGGGACCTCCA	tRF-3b	-	-	21	tRNA-Gln-TTG-2-1,GGTCCCATGGTGTAATGGTTAGCACTCTGGACTTTGAATCCAGCAATCCGAGTTCGAATCTCGGTGGGACCTCCA,Gln-TTG,54	0	0	1	3	0	0	44	2	13	1	1	0	0	0	2.78871	12.1533	0	0	137.68	8.71748	37.033	6.48841	4.37828	0
tRF-55:75-Glu-TTC-2	CGACTCCCGGTGTGGGAACCA	tRF-3b	-	-	21	tRNA-Glu-TTC-2-1,TCCCACATGGTCTAGCGGTTAGGATTCCTGGTTTTCACCCAGGCGGCCCGGGTTCGACTCCCGGTGTGGGAACCA,Glu-TTC,54	0	0	0	0	0	10	30	0	0	0	0	0	0	0	0	0	0	64.7387	93.8729	0	0	0	0	0
tRF-56:76-Arg-ACG-1-M2	CGACTCCTGGCTGGCTCGCCA	tRF-3b	-	tRF-21-LI38NJW1B	21	tRNA-Arg-ACG-1-1,GGGCCAGTGGCGCAATGGATAACGCGTCTGACTACGGATCAGAAGATTCCAGGTTCGACTCCTGGCTGGCTCGCCA,Arg-ACG,55;tRNA-Arg-ACG-2-1,GGGCCAGTGGCGCAATGGATAACGCGTCTGACTACGGATCAGAAGATTCTAGGTTCGACTCCTGGCTGGCTCGCCA,Arg-ACG,55	26	0	12	0	74	3	44	52	42	4	96	56	101.727	0	33.4645	0	498.965	19.4216	137.68	226.655	119.645	25.9536	420.315	109.436
tRF-56:76-Val-TAC-1-M2	CGAGCCCCAGTGGAACCACCA	tRF-3b	-	tRF-21-LJKP9BK1B	21	tRNA-Val-TAC-1-1,GGTTCCATAGTGTAGTGGTTATCACGTCTGCTTTACACGCAGAAGGTCCTGGGTTCGAGCCCCAGTGGAACCACCA,Val-TAC,55;tRNA-Val-TAC-2-1,GGTTCCATAGTGTAGCGGTTATCACGTCTGCTTTACACGCAGAAGGTCCTGGGTTCGAGCCCCAGTGGAACCACCA,Val-TAC,55	9	17	15	0	17	24	18	32	15	3	94	1	35.2131	28.7297	41.8306	0	114.627	155.373	56.3237	139.48	42.7304	19.4652	411.559	1.95421
tRF-55:75-Ala-CGC-1-M4	CGATCCCCGGCATCTCCACCA	tRF-3b	-	tRF-21-LMK8J7K1B	21	tRNA-Ala-CGC-1-1,GGGGATGTAGCTCAGTGGTAGAGCGCATGCTTCGCATGTATGAGGTCCCGGGTTCGATCCCCGGCATCTCCACCA,Ala-CGC,54;tRNA-Ala-CGC-2-1,GGGGATGTAGCTCAGTGGTAGAGCGCATGCTTCGCATGTATGAGGCCCCGGGTTCGATCCCCGGCATCTCCACCA,Ala-CGC,54;tRNA-Ala-TGC-2-1,GGGGATGTAGCTCAGTGGTAGAGCGCATGCTTTGCATGTATGAGGTCCCGGGTTCGATCCCCGGCATCTCCACCA,Ala-TGC,54;tRNA-Ala-TGC-3-1,GGGGATGTAGCTCAGTGGTAGAGCGCATGCTTTGCATGTATGAGGCCCCGGGTTCGATCCCCGGCATCTC…	0	0	13	0	0	12	0	0	0	0	0	0	0	0	36.2532	0	0	77.6865	0	0	0	0	0	0
tRF-57:77-Ile-AAT-1-M4	CGATCCCCGTACGGGCCACCA	tRF-3b	-	-	21	tRNA-Ile-AAT-1-1,GGCCGGTTAGCTCAGTTGGTTAGAGCGTGGCGCTAATAACGCCAAGGTCGCGGGTTCGATCCCCGTACGGGCCACCA,Ile-AAT,56;tRNA-Ile-AAT-5-1,GGCCGGTTAGCTCAGTTGGTTAGAGCGTGGTGCTAATAACGCCAAGGTCGCGGGTTCGATCCCCGTACGGGCCACCA,Ile-AAT,56;tRNA-Ile-AAT-7-1,GGCCGGTTAGCTCAGTTGGTCAGAGCGTGGTGCTAATAACGCCAAGGTCGCGGGTTCGATCCCCGTACGGGCCACCA,Ile-AAT,56;tRNA-Ile-AAT-8-1,GGCCGGTTAGCTCAGTCGGCTAGAGCGTGGTGCTAATAACGCCAAGGTCGCGGGTTCGATCCCC…	0	0	0	0	0	1	1	0	0	40	0	0	0	0	0	0	0	6.47387	3.1291	0	0	259.536	0	0
tRF-56:76-Val-CAC-3	CGATCCCGGGCGGAAACACCA	tRF-3b	-	-	21	tRNA-Val-CAC-3-1,GTTTCCGTAGTGTAGCGGTTATCACATTCGCCTCACACGCGAAAGGTCCCCGGTTCGATCCCGGGCGGAAACACCA,Val-CAC,55	0	0	0	0	0	0	0	21	1	0	0	0	0	0	0	0	0	0	0	91.5336	2.84869	0	0	0
tRF-56:76-Phe-GAA-1	CGATCCCGGGTTTCGGCACCA	tRF-3b	-	tRF-21-LM3KZSP1B	21	tRNA-Phe-GAA-1-1,GCCGAAATAGCTCAGTTGGGAGAGCGTTAGACTGAAGATCTAAAGGTCCCTGGTTCGATCCCGGGTTTCGGCACCA,Phe-GAA,55	0	0	0	10	0	0	24	0	0	0	0	0	0	0	0	40.5111	0	0	75.0983	0	0	0	0	0
tRF-55:75-Gly-TCC-1-M3	CGATTCCCGGCCAACGCACCA	tRF-3b	-	tRF-21-LNK8KDP1B	21	tRNA-Gly-TCC-1-1,GCGTTGGTGGTATAGTGGTTAGCATAGCTGCCTTCCAAGCAGTTGACCCGGGTTCGATTCCCGGCCAACGCACCA,Gly-TCC,54;tRNA-Gly-TCC-2-1,GCGTTGGTGGTATAGTGGTGAGCATAGCTGCCTTCCAAGCAGTTGACCCGGGTTCGATTCCCGGCCAACGCACCA,Gly-TCC,54;tRNA-Gly-TCC-3-1,GCGTTGGTGGTATAGTGGTAAGCATAGCTGCCTTCCAAGCAGTTGACCCGGGTTCGATTCCCGGCCAACGCACCA,Gly-TCC,54	0	0	0	0	4	0	0	0	0	0	0	0	0	0	0	0	26.9711	0	0	0	0	0	0	0
tRF-54:74-Gly-GCC-2	CGATTCCCGGCCAATGCACCA	tRF-3b	-	tRF-21-LNK8KEP1B	21	tRNA-Gly-GCC-2-1,GCATTGGTGGTTCAGTGGTAGAATTCTCGCCTGCCACGCGGGAGGCCCGGGTTCGATTCCCGGCCAATGCACCA,Gly-GCC,53	0	0	23	0	0	2	0	0	1	0	0	20	0	0	64.1403	0	0	12.9477	0	0	2.84869	0	0	39.0842
tRF-56:76-Tyr-GTA-2-M2	CGATTCCGGCTCGAAGGACCA	tRF-3b	-	tRF-21-LN3JWB61B	21	tRNA-Tyr-GTA-2-1,CCTTCGATAGCTCAGTTGGTAGAGCGGAGGACTGTAGATCCTTAGGTCGCTGGTTCGATTCCGGCTCGAAGGACCA,Tyr-GTA,55;tRNA-Tyr-GTA-5-1,CCTTCGATAGCTCAGCTGGTAGAGCGGAGGACTGTAGATCCTTAGGTCGCTGGTTCGATTCCGGCTCGAAGGACCA,Tyr-GTA,55	5	3	54	15	18	20	30	26	20	4	91	5	19.5628	5.06995	150.59	60.7666	121.37	129.477	93.8729	113.327	56.9739	25.9536	398.424	9.77104
tRF-55:75-chrM.Gln-TTG	CGATTCTCATAGTCCTAGCCA	tRF-3b	-	-	21	chrM.tRNA22-GlnTTG,TAGGATGGGGTGTGATAGGTGGCACGGAGAATTTTGGATTCTCAGGGATGGGTTCGATTCTCATAGTCCTAGCCA,Gln-TTG,54	0	0	0	0	0	0	24	0	0	0	0	0	0	0	0	0	0	0	75.0983	0	0	0	0	0
tRF-+1:T18-Thr-TGT-4	CGGCTGTAGGAATACTTT	tRF-1	-	-	18	pre_tRNA-Thr-TGT-4-1,TGCATAATAGATTGATTGTTAAATGTTTGCTCTCTGTGGCGGCTCCATAGCTCAGGGGTTAGAGCACTGGTCTTGTAAACCAGGGGTCGCGAGTTCAAATCTCGCTGGGGCCTCGGCTGTAGGAATACTTTTCCCAAGCAAAAGAGCAGGAGC,Thr-TGT,113	14	4	8	0	0	49	27	0	13	32	40	13	54.7759	6.75993	22.3097	0	0	317.22	84.4856	0	37.033	207.629	175.131	25.4047
tRF-+1:T19-Thr-TGT-4	CGGCTGTAGGAATACTTTT	tRF-1	-	-	19	pre_tRNA-Thr-TGT-4-1,TGCATAATAGATTGATTGTTAAATGTTTGCTCTCTGTGGCGGCTCCATAGCTCAGGGGTTAGAGCACTGGTCTTGTAAACCAGGGGTCGCGAGTTCAAATCTCGCTGGGGCCTCGGCTGTAGGAATACTTTTCCCAAGCAAAAGAGCAGGAGC,Thr-TGT,113	40	5	11	3	1	37	22	0	5	0	0	0	156.502	8.44991	30.6758	12.1533	6.74277	239.533	68.8401	0	14.2435	0	0	0
tRF-30:44-Asn-GTT-1-M6	CGGCTGTTAACCGAA	tRF-2	-	-	15	tRNA-Asn-GTT-1-1,GTCTCTGTGGCGCAATCGGTTAGCGCGTTCGGCTGTTAACCGAAAGGTTGGTGGTTCGATCCCACCCAGGGACGCCA,Asn-GTT,29;tRNA-Asn-GTT-2-1,GTCTCTGTGGCGCAATCGGTTAGCGCGTTCGGCTGTTAACCGAAAGGTTGGTGGTTCGAGCCCACCCAGGGACGCCA,Asn-GTT,29;tRNA-Asn-GTT-3-1,GTCTCTGTGGCGCAATCGGTTAGCGCATTCGGCTGTTAACCGAAAGGTTGGTGGTTCGAGCCCACCCAGGGACGCCA,Asn-GTT,29;tRNA-Asn-GTT-4-1,GTCTCTGTGGCGCAATCGGTTAGCGCGTTCGGCTGTTAACCGAAAGATTGGTGGTTCGAGCCCA…	2	4	0	0	26	0	0	0	0	0	0	0	7.82512	6.75993	0	0	175.312	0	0	0	0	0	0	0
tRF-+1:T14-chrM.Cys-GCA	CTCCCGCCTTTTTT	tRF-1	-	-	14	pre_chrM.tRNA19-CysGCA,GACTGTAAATCTAAAGACAGGGGTTAGGCCTCTTTTTACCAGCTCCGAGGTGATTTTCATATTGAATTGCAAATTCGAAGAAGCAGCTTCAAACCTGCCGGGGCTTCTCCCGCCTTTTTTCCCGGCGGCGGGAGAAGTAGATTGAA,Cys-GCA,106	0	0	0	0	0	0	0	0	0	0	34	0	0	0	0	0	0	0	0	0	0	0	148.862	0
tRF-59:76-Arg-ACG-1-M2	CTCCTGGCTGGCTCGCCA	tRF-3a	-	tRF-18-476YQSD2	18	tRNA-Arg-ACG-1-1,GGGCCAGTGGCGCAATGGATAACGCGTCTGACTACGGATCAGAAGATTCCAGGTTCGACTCCTGGCTGGCTCGCCA,Arg-ACG,58;tRNA-Arg-ACG-2-1,GGGCCAGTGGCGCAATGGATAACGCGTCTGACTACGGATCAGAAGATTCTAGGTTCGACTCCTGGCTGGCTCGCCA,Arg-ACG,58	6	5	18	19	0	22	46	31	81	117	33	32	23.4754	8.44991	50.1967	76.9711	0	142.425	143.938	135.121	230.744	759.144	144.483	62.5347
tRF-28:41-Glu-TTC-1-M2	CTGGTTTTCACCCA	tRF-2	-	-	14	tRNA-Glu-TTC-1-1,TCCCATATGGTCTAGCGGTTAGGATTCCTGGTTTTCACCCAGGTGGCCCGGGTTCGACTCCCGGTATGGGAACCA,Glu-TTC,27;tRNA-Glu-TTC-2-1,TCCCACATGGTCTAGCGGTTAGGATTCCTGGTTTTCACCCAGGCGGCCCGGGTTCGACTCCCGGTGTGGGAACCA,Glu-TTC,27	0	0	0	0	0	0	0	0	14	0	0	0	0	0	0	0	0	0	0	0	39.8817	0	0	0
tRF-+1:T24-Cys-GCA-2-4	CTGTGCTCCGGAGTTACCTCGTTT	tRF-1	-	-	24	pre_tRNA-Cys-GCA-2-4,TCCATAGAAATTAACTCTAATGACAACGTAGTGGCGTGGCGGGGGTATAGCTCAGTGGTAGAGCATTTGACTGCAGATCAAGAGGTCCCCGGTTCAAATCCGGGTGCCCCCTCTGTGCTCCGGAGTTACCTCGTTTTGTTGGTCTCCGGAGG,Cys-GCA,112	0	0	0	0	1	0	0	0	19	0	1	0	0	0	0	0	6.74277	0	0	0	54.1252	0	4.37828	0
tRF-51:72-chrM.Val-TAC	CTTAACTTGACCGCTCTGACCA	tRF-3b	-	tRF-22-NONU3IND2	22	chrM.tRNA2-ValTAC,CAGAGTGTAGCTTAACACAAAGCACCCAACTTACACTTAGGAGATTTCAACTTAACTTGACCGCTCTGACCA,Val-TAC,50	50	14	83	3	0	14	88	96	68	0	0	0	195.628	23.6598	231.463	12.1533	0	90.6342	275.361	418.439	193.711	0	0	0
tRF-+1:T16-Tyr-GTA-2	CTTCGTCTGTAATTTT	tRF-1	-	-	16	pre_tRNA-Tyr-GTA-2-1,AGCATTAGAGGGCTATCAGCAGCATCTTATCGCAGCGGAGCCTTCGATAGCTCAGTTGGTAGAGCGGAGGACTGTAGTGGATAGGGCGTGGCAATCCTTAGGTCGCTGGTTCGATTCCGGCTCGAAGGACTTCGTCTGTAATTTTTAACCTCAATTTAATTCAATTATC,Tyr-GTA,129	0	0	0	0	0	0	0	29	0	0	0	0	0	0	0	0	0	0	0	126.404	0	0	0	0
tRF-56:72-chrM.Val-TAC	CTTGACCGCTCTGACCA	tRF-3a	-	tRF-17-NU3IND2	17	chrM.tRNA2-ValTAC,CAGAGTGTAGCTTAACACAAAGCACCCAACTTACACTTAGGAGATTTCAACTTAACTTGACCGCTCTGACCA,Val-TAC,55	4	6	87	42	57	21	126	38	61	150	0	49	15.6502	10.1399	242.618	170.147	384.338	135.951	394.266	165.632	173.77	973.261	0	95.7562
tRF-+1:T17-Arg-ACG-2-4	CTTGTGCTCTCACTTTT	tRF-1	-	-	17	pre_tRNA-Arg-ACG-2-4,ATTATGAAAAGAGTAACAGTTAAGACAGCGTTACAGGCAGGGGCCAGTGGCGCAATGGATAACGCGTCTGACTACGGATCAGAAGATTCTAGGTTCGACTCCTGGCTGGCTCGCTTGTGCTCTCACTTTTTCCTTCTTCAAAGCCGTATTAAC,Arg-ACG,113	7	0	0	0	0	27	20	0	0	0	0	0	27.3879	0	0	0	0	174.795	62.5819	0	0	0	0	0
tRF-52:69-chrM.Thr-TGT	CTTTTTCCAAGGACACCA	tRF-3a	-	tRF-18-NZ8O6FD2	18	chrM.tRNA14-ThrTGT,GTCCTTGTAGTATAAACTAATACACCAGTCTTGTAAACCGGAGACGAAAACCTTTTTCCAAGGACACCA,Thr-TGT,51	1	4	0	0	0	0	12	15	0	58	1	0	3.91256	6.75993	0	0	0	0	37.5492	65.3811	0	376.328	4.37828	0
tRF-1:16-chrM.Ser-TGA	GAAAAAGTCATGGAGG	tRF-5a	-	tRF-16-OB16900	16	chrM.tRNA17-SerTGA,GAAAAAGTCATGGAGGCCATGGGGTTGGCTTGAAACCAGCTTTGGGGGGTTCGATTCCTTCCTTTTTTGCCA,Ser-TGA,0	3	5	0	0	0	0	0	8	0	0	0	0	11.7377	8.44991	0	0	0	0	0	34.8699	0	0	0	0
tRF-1:24-chrM.Ser-TGA	GAAAAAGTCATGGAGGCCATGGGG	tRF-5b	-	-	24	chrM.tRNA17-SerTGA,GAAAAAGTCATGGAGGCCATGGGGTTGGCTTGAAACCAGCTTTGGGGGGTTCGATTCCTTCCTTTTTTGCCA,Ser-TGA,0	0	0	0	0	0	9	0	0	0	0	0	0	0	0	0	0	0	58.2649	0	0	0	0	0	0
tRF-1:28-chrM.Ser-TGA	GAAAAAGTCATGGAGGCCATGGGGTTGG	tRF-5c	-	tRF-28-OB1690PQR304	28	chrM.tRNA17-SerTGA,GAAAAAGTCATGGAGGCCATGGGGTTGGCTTGAAACCAGCTTTGGGGGGTTCGATTCCTTCCTTTTTTGCCA,Ser-TGA,0	0	0	0	3	0	0	0	0	0	0	0	18	0	0	0	12.1533	0	0	0	0	0	0	0	35.1758
tRF-56:75-iMet-CAT-1	GAAACCATCCTCTGCTACCA	tRF-3b	-	tRF-20-ODJRWVU6	20	tRNA-iMet-CAT-1-1,AGCAGAGTGGCGCAGCGGAAGCGTGCTGGGCCCATAACCCAGAGGTCGATGGATCGAAACCATCCTCTGCTACCA,iMet-CAT,55	1	0	0	0	0	0	1	0	1	0	27	0	3.91256	0	0	0	0	0	3.1291	0	2.84869	0	118.214	0
tRF-57:76-Val-AAC-5	GAAACCGGGCAGAAACACCA	tRF-3b	-	-	20	tRNA-Val-AAC-5-1,GTTTCCGTAGTGTAGTGGTTATCACGTTTGCCTAACACGCGAAAGGTCCCCGGTTCGAAACCGGGCAGAAACACCA,Val-AAC,56	0	0	25	0	0	8	8	0	0	0	33	0	0	0	69.7177	0	0	51.791	25.0328	0	0	0	144.483	0
tRF-57:76-Val-CAC-2	GAAACCGGGCAGAAGCACCA	tRF-3b	-	-	20	tRNA-Val-CAC-2-1,GCTTCTGTAGTGTAGTGGTTATCACGTTCGCCTCACACGCGAAAGGTCCCCGGTTCGAAACCGGGCAGAAGCACCA,Val-CAC,56	0	0	1	0	0	19	0	2	23	2	2	0	0	0	2.78871	0	0	123.004	0	8.71748	65.52	12.9768	8.75657	0
tRF-57:76-Val-AAC-1-M5	GAAACCGGGCGGAAACACCA	tRF-3b	-	tRF-20-ODMJ6B26	20	tRNA-Val-AAC-1-1,GTTTCCGTAGTGTAGTGGTTATCACGTTCGCCTAACACGCGAAAGGTCCCCGGTTCGAAACCGGGCGGAAACACCA,Val-AAC,56;tRNA-Val-AAC-2-1,GTTTCCGTAGTGTAGTGGTCATCACGTTCGCCTAACACGCGAAAGGTCCCCGGTTCGAAACCGGGCGGAAACACCA,Val-AAC,56;tRNA-Val-AAC-4-1,GTTTCCGTAGTGTAGTGGTTATCACGTTCGCCTAACACGCGAAAGGTCCGCGGTTCGAAACCGGGCGGAAACACCA,Val-AAC,56;tRNA-Val-CAC-1-1,GTTTCCGTAGTGTAGTGGTTATCACGTTCGCCTCACACGCGAAAGGTCCCCGGTTCGAAACCGGGCG…	3	8	38	5	46	12	5	25	3	89	126	40	11.7377	13.5199	105.971	20.2555	310.167	77.6865	15.6455	108.969	8.54608	577.468	551.664	78.1684
tRF-66:85-Ser-TGA-1	GAACCCTGCTCGCTGCGCCA	tRF-3b	-	-	20	tRNA-Ser-TGA-1-1,GCAGCGATGGCCGAGTGGTTAAGGCGTTGGACTTGAAATCCAATGGGGTCTCCCCGCGCAGGTTCGAACCCTGCTCGCTGCGCCA,Ser-TGA,65	0	0	0	0	17	1	0	0	0	0	0	0	0	0	0	0	114.627	6.47387	0	0	0	0	0	0
tRF-15:29-chrM.Ser-GCT	GAACTGCTAACTCAT	tRF-2	-	-	15	chrM.tRNA12-SerGCT,GAGAAAGCTCACAAGAACTGCTAACTCATGCCCCCATGTCTAACAACATGGCTTTCTCACCA,Ser-GCT,14	0	0	0	0	0	5	0	0	0	0	0	0	0	0	0	0	0	32.3694	0	0	0	0	0	0
tRF-+1:T15-Ser-TGA-1	GAAGCGGGTGCTCTT	tRF-1	-	-	15	pre_tRNA-Ser-TGA-1-1,TGTTACACTAAAGTGTCTCCGCCTGTCGAATATTCTCGTGGCAGCGATGGCCGAGTGGTTAAGGCGTTGGACTTGAAATCCAATGGGGTCTCCCCGCGCAGGTTCGAACCCTGCTCGCTGCGGAAGCGGGTGCTCTTATTTTTTCTATTTTTTTAAATAAAC,Ser-TGA,122	78	42	108	52	119	157	139	45	56	58	1	303	305.18	70.9793	301.18	210.658	802.39	1016.4	434.945	196.143	159.527	376.328	4.37828	592.125
tRF-+1:T17-Ser-TGA-1	GAAGCGGGTGCTCTTAT	tRF-1	-	-	17	pre_tRNA-Ser-TGA-1-1,TGTTACACTAAAGTGTCTCCGCCTGTCGAATATTCTCGTGGCAGCGATGGCCGAGTGGTTAAGGCGTTGGACTTGAAATCCAATGGGGTCTCCCCGCGCAGGTTCGAACCCTGCTCGCTGCGGAAGCGGGTGCTCTTATTTTTTCTATTTTTTTAAATAAAC,Ser-TGA,122	495	170	283	122	114	447	487	177	240	1	57	50	1936.72	287.297	789.204	494.235	768.676	2893.82	1523.87	771.497	683.687	6.48841	249.562	97.7104
tRF-+1:T18-Ser-TGA-1	GAAGCGGGTGCTCTTATT	tRF-1	-	-	18	pre_tRNA-Ser-TGA-1-1,TGTTACACTAAAGTGTCTCCGCCTGTCGAATATTCTCGTGGCAGCGATGGCCGAGTGGTTAAGGCGTTGGACTTGAAATCCAATGGGGTCTCCCCGCGCAGGTTCGAACCCTGCTCGCTGCGGAAGCGGGTGCTCTTATTTTTTCTATTTTTTTAAATAAAC,Ser-TGA,122	511	205	417	234	65	537	353	171	196	62	61	159	1999.32	346.446	1162.89	947.959	438.28	3476.47	1104.57	745.345	558.344	402.281	267.075	310.719
tRF-+1:T19-Ser-TGA-1	GAAGCGGGTGCTCTTATTT	tRF-1	-	-	19	pre_tRNA-Ser-TGA-1-1,TGTTACACTAAAGTGTCTCCGCCTGTCGAATATTCTCGTGGCAGCGATGGCCGAGTGGTTAAGGCGTTGGACTTGAAATCCAATGGGGTCTCCCCGCGCAGGTTCGAACCCTGCTCGCTGCGGAAGCGGGTGCTCTTATTTTTTCTATTTTTTTAAATAAAC,Ser-TGA,122	945	194	633	449	330	852	388	366	395	160	634	104	3697.37	327.857	1765.25	1818.95	2225.11	5515.74	1214.09	1595.3	1125.23	1038.15	2775.83	203.238
tRF-+1:T20-Ser-TGA-1	GAAGCGGGTGCTCTTATTTT	tRF-1	1001	-	20	pre_tRNA-Ser-TGA-1-1,TGTTACACTAAAGTGTCTCCGCCTGTCGAATATTCTCGTGGCAGCGATGGCCGAGTGGTTAAGGCGTTGGACTTGAAATCCAATGGGGTCTCCCCGCGCAGGTTCGAACCCTGCTCGCTGCGGAAGCGGGTGCTCTTATTTTTTCTATTTTTTTAAATAAAC,Ser-TGA,122	1295	270	964	539	190	778	518	341	217	377	129	22	5066.77	456.295	2688.31	2183.55	1281.13	5036.67	1620.87	1486.33	618.167	2446.13	564.799	42.9926
tRF-+1:T21-Ser-TGA-1	GAAGCGGGTGCTCTTATTTTT	tRF-1	-	-	21	pre_tRNA-Ser-TGA-1-1,TGTTACACTAAAGTGTCTCCGCCTGTCGAATATTCTCGTGGCAGCGATGGCCGAGTGGTTAAGGCGTTGGACTTGAAATCCAATGGGGTCTCCCCGCGCAGGTTCGAACCCTGCTCGCTGCGGAAGCGGGTGCTCTTATTTTTTCTATTTTTTTAAATAAAC,Ser-TGA,122	295	61	167	64	46	158	58	116	76	49	32	1	1154.21	103.089	465.714	259.271	310.167	1022.87	181.488	505.614	216.501	317.932	140.105	1.95421
tRF-+1:T22-Ser-TGA-1	GAAGCGGGTGCTCTTATTTTTT	tRF-1	-	-	22	pre_tRNA-Ser-TGA-1-1,TGTTACACTAAAGTGTCTCCGCCTGTCGAATATTCTCGTGGCAGCGATGGCCGAGTGGTTAAGGCGTTGGACTTGAAATCCAATGGGGTCTCCCCGCGCAGGTTCGAACCCTGCTCGCTGCGGAAGCGGGTGCTCTTATTTTTTCTATTTTTTTAAATAAAC,Ser-TGA,122	0	16	0	0	0	26	0	0	0	0	0	0	0	27.0397	0	0	0	168.321	0	0	0	0	0	0
tRF-+1:T16-Ser-TGA-1-M1-15:A>T	GAAGCGGGTGCTCTTT	tRF-1	-	-	16	pre_tRNA-Ser-TGA-1-1,TGTTACACTAAAGTGTCTCCGCCTGTCGAATATTCTCGTGGCAGCGATGGCCGAGTGGTTAAGGCGTTGGACTTGAAATCCAATGGGGTCTCCCCGCGCAGGTTCGAACCCTGCTCGCTGCGGAAGCGGGTGCTCTTATTTTTTCTATTTTTTTAAATAAAC,Ser-TGA,122	1	0	2	0	0	13	4	0	1	0	0	0	3.91256	0	5.57742	0	0	84.1604	12.5164	0	2.84869	0	0	0
tRF-56:75-Trp-CCA-4	GAATCACGTCGGGGTCACCA	tRF-3b	-	tRF-20-OMEMR326	20	tRNA-Trp-CCA-4-1,GACCTCGTGGCGCAACGGTAGCGCGTCTGACTCCAGATCAGAAGGCTGCGTGTTCGAATCACGTCGGGGTCACCA,Trp-CCA,55	3	1	24	0	0	2	4	0	1	18	40	32	11.7377	1.68998	66.929	0	0	12.9477	12.5164	0	2.84869	116.791	175.131	62.5347
tRF-66:85-Leu-AAG-1-M5	GAATCCCACCGCTGCCACCA	tRF-3b	-	tRF-20-OMK1QV26	20	tRNA-Leu-AAG-1-1,GGTAGCGTGGCCGAGCGGTCTAAGGCGCTGGATTAAGGCTCCAGTCTCTTCGGAGGCGTGGGTTCGAATCCCACCGCTGCCACCA,Leu-AAG,65;tRNA-Leu-AAG-2-1,GGTAGCGTGGCCGAGCGGTCTAAGGCGCTGGATTAAGGCTCCAGTCTCTTCGGGGGCGTGGGTTCGAATCCCACCGCTGCCACCA,Leu-AAG,65;tRNA-Leu-AAG-4-1,GGTAGCGTGGCCGAGTGGTCTAAGACGCTGGATTAAGGCTCCAGTCTCTTCGGGGGCGTGGGTTTGAATCCCACCGCTGCCACCA,Leu-AAG,65;tRNA-Leu-TAG-1-1,GGTAGCGTGGCCGAGCGGTCTAAGGCGCTGGATTTAGGCT…	0	0	6	4	0	2	2	0	0	0	52	20	0	0	16.7322	16.2044	0	12.9477	6.25819	0	0	0	227.671	39.0842
tRF-67:86-Leu-CAG-1	GAATCCCACTCCTGACACCA	tRF-3b	-	tRF-20-OMKI3U26	20	tRNA-Leu-CAG-1-1,GTCAGGATGGCCGAGCGGTCTAAGGCGCTGCGTTCAGGTCGCAGTCTCCCCTGGAGGCGTGGGTTCGAATCCCACTCCTGACACCA,Leu-CAG,66	0	4	0	0	0	0	0	0	0	0	0	23	0	6.75993	0	0	0	0	0	0	0	0	0	44.9468
tRF-67:86-Leu-CAA-1-M5	GAATCCCACTTCTGACACCA	tRF-3b	-	tRF-20-OMKIWU26	20	tRNA-Leu-CAA-1-1,GTCAGGATGGCCGAGTGGTCTAAGGCGCCAGACTCAAGTTCTGGTCTCCAATGGAGGCGTGGGTTCGAATCCCACTTCTGACACCA,Leu-CAA,66;tRNA-Leu-CAA-2-1,GTCAGGATGGCCGAGTGGTCTAAGGCGCCAGACTCAAGTTCTGGTCTCCGTATGGAGGCGTGGGTTCGAATCCCACTTCTGACACCA,Leu-CAA,67;tRNA-Leu-CAA-3-1,GTCAGGATGGCCGAGTGGTCTAAGGCGCCAGACTCAAGTTCTGGTCTCCGCATGGAGGCGTGGGTTCGAATCCCACTTCTGACACCA,Leu-CAA,67;tRNA-Leu-CAA-4-1,GTCAGGATGGCCGAGTGGTCTAAGGCGCCAGACTC…	3	8	0	7	7	1	0	0	11	60	0	1	11.7377	13.5199	0	28.3578	47.1994	6.47387	0	0	31.3356	389.305	0	1.95421
tRF-58:77-Thr-AGT-1-M2	GAATCCCAGCGGTGCCTCCA	tRF-3b	-	tRF-20-OMKJRV46	20	tRNA-Thr-AGT-1-1,GGCGCCGTGGCTTAGTTGGTTAAAGCGCCTGTCTAGTAAACAGGAGATCCTGGGTTCGAATCCCAGCGGTGCCTCCA,Thr-AGT,57;tRNA-Thr-AGT-5-1,GGCGCCGTGGCTTAGCTGGTTAAAGCGCCTGTCTAGTAAACAGGAGATCCTGGGTTCGAATCCCAGCGGTGCCTCCA,Thr-AGT,57	0	0	0	3	0	1	0	1	35	1	32	1	0	0	0	12.1533	0	6.47387	0	4.35874	99.7043	6.48841	140.105	1.95421
tRF-58:77-Thr-TGT-1	GAATCCCAGTAGAGCCTCCA	tRF-3b	-	-	20	tRNA-Thr-TGT-1-1,GGCTCTATGGCTTAGTTGGTTAAAGCGCCTGTCTTGTAAACAGGAGATCCTGGGTTCGAATCCCAGTAGAGCCTCCA,Thr-TGT,57	0	0	0	0	0	28	0	0	0	0	0	0	0	0	0	0	0	181.268	0	0	0	0	0	0
tRF-66:85-Ser-GCT-3-M4	GAATCCCATCCTCGTCGCCA	tRF-3b	-	tRF-20-OMKM4WL6	20	tRNA-Ser-GCT-3-1,GACGAGGTGGCCGAGTGGTTAAGGCGATGGACTGCTAATCCATTGTGCTTTGCACGCGTGGGTTCGAATCCCATCCTCGTCGCCA,Ser-GCT,65;tRNA-Ser-GCT-4-1,GACGAGGTGGCCGAGTGGTTAAGGCGATGGACTGCTAATCCATTGTGCTCTGCACGCGTGGGTTCGAATCCCATCCTCGTCGCCA,Ser-GCT,65;tRNA-Ser-GCT-5-1,GACGAGGTGGCCGAGTGGTTAAGGCGATGGACTGCTAATCCATTGTGCTCTGCACACGTGGGTTCGAATCCCATCCTCGTCGCCA,Ser-GCT,65;tRNA-Ser-GCT-6-1,GGAGAGGCCTGGCCGAGTGGTTAAGGCGATGGACTGCTAA…	0	0	13	0	22	0	1	1	17	0	0	0	0	0	36.2532	0	148.341	0	3.1291	4.35874	48.4278	0	0	0
tRF-57:76-Tyr-GTA-1-M2	GAATCCGGCTCGAAGGACCA	tRF-3b	-	tRF-20-OMMIL0O6	20	tRNA-Tyr-GTA-1-1,CCTTCGATAGCTCAGTTGGTAGAGCGGAGGACTGTAGATCCTTAGGTCGCTGGTTCGAATCCGGCTCGAAGGACCA,Tyr-GTA,56;tRNA-Tyr-GTA-8-1,CTTTCGATAGCTCAGTTGGTAGAGCGGAGGACTGTAGATCCTTAGGTCGCTGGTTCGAATCCGGCTCGAAGGACCA,Tyr-GTA,56	17	0	12	1	1	2	0	4	38	6	42	17	66.5136	0	33.4645	4.05111	6.74277	12.9477	0	17.435	108.25	38.9305	183.888	33.2216
tRF-66:85-Ser-AGA-1-M6	GAATCCTGCCGACTACGCCA	tRF-3b	-	tRF-20-OMN1OXL6	20	tRNA-Ser-AGA-1-1,GTAGTCGTGGCCGAGTGGTTAAGGCGATGGACTAGAAATCCATTGGGGTTTCCCCGCGCAGGTTCGAATCCTGCCGACTACGCCA,Ser-AGA,65;tRNA-Ser-AGA-2-1,GTAGTCGTGGCCGAGTGGTTAAGGCGATGGACTAGAAATCCATTGGGGTCTCCCCGCGCAGGTTCGAATCCTGCCGACTACGCCA,Ser-AGA,65;tRNA-Ser-AGA-3-1,GTAGTCGTGGCCGAGTGGTTAAGGCGATGGACTAGAAATCCATTGGGGTTTCCCCACGCAGGTTCGAATCCTGCCGACTACGCCA,Ser-AGA,65;tRNA-Ser-AGA-4-1,GTAGTCGTGGCCGAGTGGTTAAGGTGATGGACTAGAAACC…	0	0	15	0	0	0	1	0	1	0	0	0	0	0	41.8306	0	0	0	3.1291	0	2.84869	0	0	0
tRF-66:85-Ser-CGA-4	GAATCCTGTTCGTGACGCCA	tRF-3b	-	-	20	tRNA-Ser-CGA-4-1,GTCACGGTGGCCGAGTGGTTAAGGCGTTGGACTCGAAATCCAATGGGGTTTCCCCGCACAGGTTCGAATCCTGTTCGTGACGCCA,Ser-CGA,65	0	0	0	0	0	0	0	35	0	0	0	0	0	0	0	0	0	0	0	152.556	0	0	0	0
tRF-56:75-Gln-TTG-2	GAATCTCGGTGGGACCTCCA	tRF-3b	-	-	20	tRNA-Gln-TTG-2-1,GGTCCCATGGTGTAATGGTTAGCACTCTGGACTTTGAATCCAGCAATCCGAGTTCGAATCTCGGTGGGACCTCCA,Gln-TTG,55	0	0	1	0	0	2	1	1	1	6	1	1	0	0	2.78871	0	0	12.9477	3.1291	4.35874	2.84869	38.9305	4.37828	1.95421
tiRNA-1:34-Arg-CCG-2	GACCCAGTGGCCTAATGGATAAGGCATCAGCCTC	tiRNA-5	-	-	34	tRNA-Arg-CCG-2-1,GACCCAGTGGCCTAATGGATAAGGCATCAGCCTCCGGAGCTGGGGATTGTGGGTTCGAGTCCCATCTGGGTCGCCA,Arg-CCG,0	0	0	0	0	0	1	0	1	0	0	37	0	0	0	0	0	0	6.47387	0	4.35874	0	0	161.996	0
tRF-1:14-Ser-GCT-1-M5	GACGAGGTGGCCGA	tRF-5a	-	-	14	tRNA-Ser-GCT-1-1,GACGAGGTGGCCGAGTGGTTAAGGCGATGGACTGCTAATCCATTGTGCTCTGCACGCGTGGGTTCGAATCCCACCCTCGTCGCCA,Ser-GCT,0;tRNA-Ser-GCT-2-1,GACGAGGTGGCCGAGTGGTTAAGGCGATGGACTGCTAATCCATTGTGCTCTGCACGCGTGGGTTCGAATCCCACCTTCGTCGCCA,Ser-GCT,0;tRNA-Ser-GCT-3-1,GACGAGGTGGCCGAGTGGTTAAGGCGATGGACTGCTAATCCATTGTGCTTTGCACGCGTGGGTTCGAATCCCATCCTCGTCGCCA,Ser-GCT,0;tRNA-Ser-GCT-4-1,GACGAGGTGGCCGAGTGGTTAAGGCGATGGACTGCTAATCCAT…	2121	216	279	165	1509	530	2216	737	1990	2145	451	2032	8298.54	365.036	778.05	668.433	10174.8	3431.15	6934.08	3212.39	5668.9	13917.6	1974.61	3970.95
tRF-1:15-Ser-GCT-1-M5	GACGAGGTGGCCGAG	tRF-5a	-	-	15	tRNA-Ser-GCT-1-1,GACGAGGTGGCCGAGTGGTTAAGGCGATGGACTGCTAATCCATTGTGCTCTGCACGCGTGGGTTCGAATCCCACCCTCGTCGCCA,Ser-GCT,0;tRNA-Ser-GCT-2-1,GACGAGGTGGCCGAGTGGTTAAGGCGATGGACTGCTAATCCATTGTGCTCTGCACGCGTGGGTTCGAATCCCACCTTCGTCGCCA,Ser-GCT,0;tRNA-Ser-GCT-3-1,GACGAGGTGGCCGAGTGGTTAAGGCGATGGACTGCTAATCCATTGTGCTTTGCACGCGTGGGTTCGAATCCCATCCTCGTCGCCA,Ser-GCT,0;tRNA-Ser-GCT-4-1,GACGAGGTGGCCGAGTGGTTAAGGCGATGGACTGCTAATCCAT…	6240	1091	1190	219	8196	1335	9744	1320	7888	5859	1060	12397	24414.4	1843.77	3318.56	887.193	55263.7	8642.62	30489.9	5753.54	22470.5	38015.6	4640.98	24226.3
tRF-1:16-Ser-GCT-1-M5	GACGAGGTGGCCGAGT	tRF-5a	-	tRF-16-OUR830E	16	tRNA-Ser-GCT-1-1,GACGAGGTGGCCGAGTGGTTAAGGCGATGGACTGCTAATCCATTGTGCTCTGCACGCGTGGGTTCGAATCCCACCCTCGTCGCCA,Ser-GCT,0;tRNA-Ser-GCT-2-1,GACGAGGTGGCCGAGTGGTTAAGGCGATGGACTGCTAATCCATTGTGCTCTGCACGCGTGGGTTCGAATCCCACCTTCGTCGCCA,Ser-GCT,0;tRNA-Ser-GCT-3-1,GACGAGGTGGCCGAGTGGTTAAGGCGATGGACTGCTAATCCATTGTGCTTTGCACGCGTGGGTTCGAATCCCATCCTCGTCGCCA,Ser-GCT,0;tRNA-Ser-GCT-4-1,GACGAGGTGGCCGAGTGGTTAAGGCGATGGACTGCTAATCCAT…	18	49	41	12	1	44	28	28	19	0	85	20	70.4261	82.8092	114.337	48.6133	6.74277	284.85	87.6147	122.045	54.1252	0	372.154	39.0842
tRF-1:22-Ser-GCT-1-M5	GACGAGGTGGCCGAGTGGTTAA	tRF-5b	-	tRF-22-OUR8309NF	22	tRNA-Ser-GCT-1-1,GACGAGGTGGCCGAGTGGTTAAGGCGATGGACTGCTAATCCATTGTGCTCTGCACGCGTGGGTTCGAATCCCACCCTCGTCGCCA,Ser-GCT,0;tRNA-Ser-GCT-2-1,GACGAGGTGGCCGAGTGGTTAAGGCGATGGACTGCTAATCCATTGTGCTCTGCACGCGTGGGTTCGAATCCCACCTTCGTCGCCA,Ser-GCT,0;tRNA-Ser-GCT-3-1,GACGAGGTGGCCGAGTGGTTAAGGCGATGGACTGCTAATCCATTGTGCTTTGCACGCGTGGGTTCGAATCCCATCCTCGTCGCCA,Ser-GCT,0;tRNA-Ser-GCT-4-1,GACGAGGTGGCCGAGTGGTTAAGGCGATGGACTGCTAATCCAT…	3	7	11	17	0	0	0	5	1	0	0	0	11.7377	11.8299	30.6758	68.8688	0	0	0	21.7937	2.84869	0	0	0
tRF-1:23-Ser-GCT-1-M5	GACGAGGTGGCCGAGTGGTTAAG	tRF-5b	-	tRF-23-OUR8309NS	23	tRNA-Ser-GCT-1-1,GACGAGGTGGCCGAGTGGTTAAGGCGATGGACTGCTAATCCATTGTGCTCTGCACGCGTGGGTTCGAATCCCACCCTCGTCGCCA,Ser-GCT,0;tRNA-Ser-GCT-2-1,GACGAGGTGGCCGAGTGGTTAAGGCGATGGACTGCTAATCCATTGTGCTCTGCACGCGTGGGTTCGAATCCCACCTTCGTCGCCA,Ser-GCT,0;tRNA-Ser-GCT-3-1,GACGAGGTGGCCGAGTGGTTAAGGCGATGGACTGCTAATCCATTGTGCTTTGCACGCGTGGGTTCGAATCCCATCCTCGTCGCCA,Ser-GCT,0;tRNA-Ser-GCT-4-1,GACGAGGTGGCCGAGTGGTTAAGGCGATGGACTGCTAATCCAT…	0	4	8	3	0	0	0	16	0	0	36	0	0	6.75993	22.3097	12.1533	0	0	0	69.7399	0	0	157.618	0
tRF-1:24-Ser-GCT-1-M5	GACGAGGTGGCCGAGTGGTTAAGG	tRF-5b	-	tRF-24-OUR8309N0Y	24	tRNA-Ser-GCT-1-1,GACGAGGTGGCCGAGTGGTTAAGGCGATGGACTGCTAATCCATTGTGCTCTGCACGCGTGGGTTCGAATCCCACCCTCGTCGCCA,Ser-GCT,0;tRNA-Ser-GCT-2-1,GACGAGGTGGCCGAGTGGTTAAGGCGATGGACTGCTAATCCATTGTGCTCTGCACGCGTGGGTTCGAATCCCACCTTCGTCGCCA,Ser-GCT,0;tRNA-Ser-GCT-3-1,GACGAGGTGGCCGAGTGGTTAAGGCGATGGACTGCTAATCCATTGTGCTTTGCACGCGTGGGTTCGAATCCCATCCTCGTCGCCA,Ser-GCT,0;tRNA-Ser-GCT-4-1,GACGAGGTGGCCGAGTGGTTAAGGCGATGGACTGCTAATCCAT…	5	0	0	17	18	1	22	15	0	24	0	0	19.5628	0	0	68.8688	121.37	6.47387	68.8401	65.3811	0	155.722	0	0
tiRNA-1:34-Ser-GCT-1-M5	GACGAGGTGGCCGAGTGGTTAAGGCGATGGACTG	tiRNA-5	-	-	34	tRNA-Ser-GCT-1-1,GACGAGGTGGCCGAGTGGTTAAGGCGATGGACTGCTAATCCATTGTGCTCTGCACGCGTGGGTTCGAATCCCACCCTCGTCGCCA,Ser-GCT,0;tRNA-Ser-GCT-2-1,GACGAGGTGGCCGAGTGGTTAAGGCGATGGACTGCTAATCCATTGTGCTCTGCACGCGTGGGTTCGAATCCCACCTTCGTCGCCA,Ser-GCT,0;tRNA-Ser-GCT-3-1,GACGAGGTGGCCGAGTGGTTAAGGCGATGGACTGCTAATCCATTGTGCTTTGCACGCGTGGGTTCGAATCCCATCCTCGTCGCCA,Ser-GCT,0;tRNA-Ser-GCT-4-1,GACGAGGTGGCCGAGTGGTTAAGGCGATGGACTGCTAATCCAT…	1	0	1	0	0	4	3	6	8	0	0	0	3.91256	0	2.78871	0	0	25.8955	9.38729	26.1525	22.7896	0	0	0
tRF-56:75-Glu-TTC-2	GACTCCCGGTGTGGGAACCA	tRF-3b	-	-	20	tRNA-Glu-TTC-2-1,TCCCACATGGTCTAGCGGTTAGGATTCCTGGTTTTCACCCAGGCGGCCCGGGTTCGACTCCCGGTGTGGGAACCA,Glu-TTC,55	0	5	0	0	0	0	11	0	0	0	0	0	0	8.44991	0	0	0	0	34.4201	0	0	0	0	0
tRF-57:76-Arg-ACG-1-M2	GACTCCTGGCTGGCTCGCCA	tRF-3b	-	-	20	tRNA-Arg-ACG-1-1,GGGCCAGTGGCGCAATGGATAACGCGTCTGACTACGGATCAGAAGATTCCAGGTTCGACTCCTGGCTGGCTCGCCA,Arg-ACG,56;tRNA-Arg-ACG-2-1,GGGCCAGTGGCGCAATGGATAACGCGTCTGACTACGGATCAGAAGATTCTAGGTTCGACTCCTGGCTGGCTCGCCA,Arg-ACG,56	9	3	3	0	33	18	8	4	8	4	26	3	35.2131	5.06995	8.36612	0	222.511	116.53	25.0328	17.435	22.7896	25.9536	113.835	5.86263
tRF-30:43-Gln-CTG-1-M6	GACTCTGAATCCAG	tRF-2	-	-	14	tRNA-Gln-CTG-1-1,GGTTCCATGGTGTAATGGTTAGCACTCTGGACTCTGAATCCAGCGATCCGAGTTCAAATCTCGGTGGAACCTCCA,Gln-CTG,29;tRNA-Gln-CTG-2-1,GGTTCCATGGTGTAATGGTTAGCACTCTGGACTCTGAATCCAGCGATCCGAGTTCAAGTCTCGGTGGAACCTCCA,Gln-CTG,29;tRNA-Gln-CTG-3-1,GGTTCCATGGTGTAATGGTGAGCACTCTGGACTCTGAATCCAGCGATCCGAGTTCGAGTCTCGGTGGAACCTCCA,Gln-CTG,29;tRNA-Gln-CTG-4-1,GGTTCCATGGTGTAATGGTAAGCACTCTGGACTCTGAATCCAGCGATCCGAGTTCGAGTCTCGGTGGAAC…	1280	33	1884	292	2532	1798	3512	4046	4444	3132	264	3132	5008.08	55.7694	5253.93	1182.92	17072.7	11640	10989.4	17635.5	12659.6	20321.7	1155.87	6120.58
tRF-30:43-Gln-CTG-5	GACTCTGAATCCGG	tRF-2	-	-	14	tRNA-Gln-CTG-5-1,GGTTCCATGGTGTAATGGTTAGCACTCTGGACTCTGAATCCGGTAATCCGAGTTCAAATCTCGGTGGAACCTCCA,Gln-CTG,29	12	0	15	4	21	8	26	34	30	40	1	28	46.9507	0	41.8306	16.2044	141.598	51.791	81.3565	148.197	85.4608	259.536	4.37828	54.7179
tRF-30:43-Phe-GAA-6	GACTGAAGATCTTA	tRF-2	-	-	14	tRNA-Phe-GAA-6-1,GCTGAAATAGCTCAGTTGGGAGAGCGTTAGACTGAAGATCTTAAAGTTCCCTGGTTCAACCCTGGGTTTCAGCCCCA,Phe-GAA,29	0	0	0	2	0	4	0	2	2	0	0	0	0	0	0	8.10222	0	25.8955	0	8.71748	5.69739	0	0	0
tRF-30:43-Gln-TTG-1-M3	GACTTTGAATCCAG	tRF-2	-	-	14	tRNA-Gln-TTG-1-1,GGTCCCATGGTGTAATGGTTAGCACTCTGGACTTTGAATCCAGCGATCCGAGTTCAAATCTCGGTGGGACCTCCA,Gln-TTG,29;tRNA-Gln-TTG-2-1,GGTCCCATGGTGTAATGGTTAGCACTCTGGACTTTGAATCCAGCAATCCGAGTTCGAATCTCGGTGGGACCTCCA,Gln-TTG,29;tRNA-Gln-TTG-3-1,GGCCCCATGGTGTAATGGTTAGCACTCTGGACTTTGAATCCAGCGATCCGAGTTCAAATCTCGGTGGGACCTCCA,Gln-TTG,29	2	0	3	0	4	2	8	3	4	6	0	32	7.82512	0	8.36612	0	26.9711	12.9477	25.0328	13.0762	11.3948	38.9305	0	62.5347
tRF-55:71-chrM.Pro-TGG	GACTTTTTCTCTGACCA	tRF-3a	-	tRF-17-OZZ7ND2	17	chrM.tRNA15-ProTGG,CAGAGAATAGTTTAAATTAGAATCTTAGCTTTGGGTGCTAATGGTGGAGTTAAAGACTTTTTCTCTGACCA,Pro-TGG,54	3	4	16	4	0	0	78	0	0	0	0	0	11.7377	6.75993	44.6193	16.2044	0	0	244.07	0	0	0	0	0
tiRNA-1:20-chrM.Ser-GCT	GAGAAAGCTCACAAGAACTG	tiRNA-5	-	tRF-20-5BF900BY	20	chrM.tRNA12-SerGCT,GAGAAAGCTCACAAGAACTGCTAACTCATGCCCCCATGTCTAACAACATGGCTTTCTCACCA,Ser-GCT,0	13	9	21	0	18	35	42	0	33	0	0	30	50.8633	15.2098	58.5629	0	121.37	226.586	131.422	0	94.0069	0	0	58.6263
tRF-1:22-chrM.Ser-GCT	GAGAAAGCTCACAAGAACTGCT	tRF-5b	-	tRF-22-5BF900BY3	22	chrM.tRNA12-SerGCT,GAGAAAGCTCACAAGAACTGCTAACTCATGCCCCCATGTCTAACAACATGGCTTTCTCACCA,Ser-GCT,0	42	43	64	54	0	39	111	33	44	11	0	25	164.328	72.6693	178.477	218.76	0	252.481	347.33	143.838	125.343	71.3725	0	48.8552
tRF-1:24-chrM.Ser-GCT	GAGAAAGCTCACAAGAACTGCTAA	tRF-5b	-	tRF-24-5BF900BYHF	24	chrM.tRNA12-SerGCT,GAGAAAGCTCACAAGAACTGCTAACTCATGCCCCCATGTCTAACAACATGGCTTTCTCACCA,Ser-GCT,0	0	0	0	0	0	0	0	0	0	0	72	0	0	0	0	0	0	0	0	0	0	0	315.236	0
tRF-58:77-Asn-GTT-2-M4	GAGCCCACCCAGGGACGCCA	tRF-3b	-	tRF-20-512R12L6	20	tRNA-Asn-GTT-2-1,GTCTCTGTGGCGCAATCGGTTAGCGCGTTCGGCTGTTAACCGAAAGGTTGGTGGTTCGAGCCCACCCAGGGACGCCA,Asn-GTT,57;tRNA-Asn-GTT-3-1,GTCTCTGTGGCGCAATCGGTTAGCGCATTCGGCTGTTAACCGAAAGGTTGGTGGTTCGAGCCCACCCAGGGACGCCA,Asn-GTT,57;tRNA-Asn-GTT-4-1,GTCTCTGTGGCGCAATCGGTTAGCGCGTTCGGCTGTTAACCGAAAGATTGGTGGTTCGAGCCCACCCAGGGACGCCA,Asn-GTT,57;tRNA-Asn-GTT-5-1,GTCTCTGTGGCGCAATCGGTTAGCGCGTTCGGCTGTTAACTGAAAGGTTGGTGGTTCGAGCCCA…	0	0	0	0	0	8	0	0	19	0	48	0	0	0	0	0	0	51.791	0	0	54.1252	0	210.158	0
tRF-57:76-Val-TAC-1-M2	GAGCCCCAGTGGAACCACCA	tRF-3b	-	-	20	tRNA-Val-TAC-1-1,GGTTCCATAGTGTAGTGGTTATCACGTCTGCTTTACACGCAGAAGGTCCTGGGTTCGAGCCCCAGTGGAACCACCA,Val-TAC,56;tRNA-Val-TAC-2-1,GGTTCCATAGTGTAGCGGTTATCACGTCTGCTTTACACGCAGAAGGTCCTGGGTTCGAGCCCCAGTGGAACCACCA,Val-TAC,56	0	6	19	11	0	0	0	0	1	60	7	11	0	10.1399	52.9855	44.5622	0	0	0	0	2.84869	389.305	30.648	21.4963
tRF-+1:T15-Asp-GTC-2-6	GAGGCTTAAACTTTT	tRF-1	1028	-	15	pre_tRNA-Asp-GTC-2-6,CTTCACAGGGATTTCCTAAGAGCTCCATTTTCACGTCAATTCCTCGTTAGTATAGTGGTGAGTATCCCCGCCTGTCACGCGGGAGACCGGGGTTCGATTCCCCGACGGGGAGGAGGCTTAAACTTTTTTTTAGAAAAGCACACTTCCGGTAA,Asp-GTC,112	0	0	0	0	0	0	0	1	0	0	0	18	0	0	0	0	0	0	0	4.35874	0	0	0	35.1758
tRF-56:75-Gln-CTG-3-M2	GAGTCTCGGTGGAACCTCCA	tRF-3b	-	-	20	tRNA-Gln-CTG-3-1,GGTTCCATGGTGTAATGGTGAGCACTCTGGACTCTGAATCCAGCGATCCGAGTTCGAGTCTCGGTGGAACCTCCA,Gln-CTG,55;tRNA-Gln-CTG-4-1,GGTTCCATGGTGTAATGGTAAGCACTCTGGACTCTGAATCCAGCGATCCGAGTTCGAGTCTCGGTGGAACCTCCA,Gln-CTG,55	0	0	0	0	1	0	1	0	0	5	0	1	0	0	0	0	6.74277	0	3.1291	0	0	32.442	0	1.95421
tRF-57:76-Ala-AGC-11-M2	GATGCCCGCATTCTCCACCA	tRF-3b	-	-	20	tRNA-Ala-AGC-11-1,GGGGAATTAGCTCAAATGGTAGAGCGCTCGCTTAGCATGCGAGAGGTAGCGGGATCGATGCCCGCATTCTCCACCA,Ala-AGC,56;tRNA-Ala-AGC-15-1,GGGGAATTAGCTCAAGTGGTAGAGCGCTCGCTTAGCATGCGAGAGGTAGTGGGATCGATGCCCGCATTCTCCACCA,Ala-AGC,56	0	0	0	0	0	1	0	0	10	1	0	0	0	0	0	0	0	6.47387	0	0	28.4869	6.48841	0	0
tRF-57:76-Tyr-GTA-4	GATTCCAGCTCGAAGGACCA	tRF-3b	-	tRF-20-59JIL0O6	20	tRNA-Tyr-GTA-4-1,CCTTCGATAGCTCAGCTGGTAGAGCGGAGGACTGTAGATCCTTAGGTCGCTGGTTCGATTCCAGCTCGAAGGACCA,Tyr-GTA,56	0	0	9	0	0	0	1	0	0	0	0	1	0	0	25.0984	0	0	0	3.1291	0	0	0	0	1.95421
tRF-56:75-Gly-TCC-1-M3	GATTCCCGGCCAACGCACCA	tRF-3b	-	tRF-20-593J2H26	20	tRNA-Gly-TCC-1-1,GCGTTGGTGGTATAGTGGTTAGCATAGCTGCCTTCCAAGCAGTTGACCCGGGTTCGATTCCCGGCCAACGCACCA,Gly-TCC,55;tRNA-Gly-TCC-2-1,GCGTTGGTGGTATAGTGGTGAGCATAGCTGCCTTCCAAGCAGTTGACCCGGGTTCGATTCCCGGCCAACGCACCA,Gly-TCC,55;tRNA-Gly-TCC-3-1,GCGTTGGTGGTATAGTGGTAAGCATAGCTGCCTTCCAAGCAGTTGACCCGGGTTCGATTCCCGGCCAACGCACCA,Gly-TCC,55	0	0	11	0	0	1	1	2	0	1	0	0	0	0	30.6758	0	0	6.47387	3.1291	8.71748	0	6.48841	0	0
tRF-55:74-Gly-GCC-2	GATTCCCGGCCAATGCACCA	tRF-3b	-	tRF-20-593J2426	20	tRNA-Gly-GCC-2-1,GCATTGGTGGTTCAGTGGTAGAATTCTCGCCTGCCACGCGGGAGGCCCGGGTTCGATTCCCGGCCAATGCACCA,Gly-GCC,54	4	0	10	14	0	0	0	74	1	0	21	0	15.6502	0	27.8871	56.7155	0	0	0	322.547	2.84869	0	91.944	0
tRF-55:74-Gly-GCC-1	GATTCCCGGCCCATGCACCA	tRF-3b	-	tRF-20-593JK426	20	tRNA-Gly-GCC-1-1,GCATGGGTGGTTCAGTGGTAGAATTCTCGCCTGCCACGCGGGAGGCCCGGGTTCGATTCCCGGCCCATGCACCA,Gly-GCC,54	0	0	8	0	0	0	1	1	13	0	0	0	0	0	22.3097	0	0	0	3.1291	4.35874	37.033	0	0	0
tRF-55:74-Gly-CCC-2	GATTCCCGGGCGGCGCACCA	tRF-3b	-	-	20	tRNA-Gly-CCC-2-1,GCGCCGCTGGTGTAGTGGTATCATGCAAGATTCCCATTCTTGCGACCCGGGTTCGATTCCCGGGCGGCGCACCA,Gly-CCC,54	0	3	6	0	0	0	0	2	0	0	0	49	0	5.06995	16.7322	0	0	0	0	8.71748	0	0	0	95.7562
tRF-30:43-Arg-CCG-1	GATTCCGGATCAGA	tRF-2	-	-	14	tRNA-Arg-CCG-1-1,GGCCGCGTGGCCTAATGGATAAGGCGTCTGATTCCGGATCAGAAGATTGAGGGTTCGAGTCCCTTCGTGGTCGCCA,Arg-CCG,29	0	0	0	10	0	0	0	0	0	0	0	0	0	0	0	40.5111	0	0	0	0	0	0	0	0
tRF-57:76-Tyr-GTA-2-M2	GATTCCGGCTCGAAGGACCA	tRF-3b	-	tRF-20-59MIL0O6	20	tRNA-Tyr-GTA-2-1,CCTTCGATAGCTCAGTTGGTAGAGCGGAGGACTGTAGATCCTTAGGTCGCTGGTTCGATTCCGGCTCGAAGGACCA,Tyr-GTA,56;tRNA-Tyr-GTA-5-1,CCTTCGATAGCTCAGCTGGTAGAGCGGAGGACTGTAGATCCTTAGGTCGCTGGTTCGATTCCGGCTCGAAGGACCA,Tyr-GTA,56	28	29	130	58	150	70	50	144	78	172	280	226	109.552	49.0095	362.532	234.964	1011.42	453.171	156.455	627.659	222.198	1116.01	1225.92	441.651
tRF-+1:T14-Lys-CTT-2-2	GCAACTGGTCGTTT	tRF-1	-	-	14	pre_tRNA-Lys-CTT-2-2,TGATCTAGAATGAAAAATTGTTGAGATACGGTCATCGGGCGCCCGGCTAGCTCAGTCGGTAGAGCATGAGACTCTTAATCTCAGGGTCGTGGGTTCGAGCCCCACGTTGGGCGGCAACTGGTCGTTTTAGTCCTAAATCTACGACTACTAGCC,Lys-CTT,113	0	10	10	4	0	1	0	5	31	1	108	0	0	16.8998	27.8871	16.2044	0	6.47387	0	21.7937	88.3095	6.48841	472.855	0
tRF-+1:T15-Lys-CTT-2-2	GCAACTGGTCGTTTT	tRF-1	1024	-	15	pre_tRNA-Lys-CTT-2-2,TGATCTAGAATGAAAAATTGTTGAGATACGGTCATCGGGCGCCCGGCTAGCTCAGTCGGTAGAGCATGAGACTCTTAATCTCAGGGTCGTGGGTTCGAGCCCCACGTTGGGCGGCAACTGGTCGTTTTAGTCCTAAATCTACGACTACTAGCC,Lys-CTT,113	0	0	12	32	0	2	0	0	0	0	0	0	0	0	33.4645	129.635	0	12.9477	0	0	0	0	0	0
tRF-+1:T16-Gly-GCC-1-M2	GCACGCCCTCCCATTT	tRF-1	-	-	16	pre_tRNA-Gly-GCC-1-1,AGTTCCGCTGTGCCAGCTTCCGTTGGCGTTTGCCATCGGTGCATGGGTGGTTCAGTGGTAGAATTCTCGCCTGCCACGCGGGAGGCCCGGGTTCGATTCCCGGCCCATGCAGCACGCCCTCCCATTTTGGTGCTGCAGCAGCACCAAGGCG,Gly-GCC,111;pre_tRNA-Gly-GCC-4-1,AGCTCTGCTGTGACAGCTTCCATTGGCATTTGCCATCAGTGCATAGGTGGTTCAGTGGTAGAATTCTTGCCTGCCACGCAGGAGGCCCAGGTTTGATTCCTGGCCCATGCAGCACGCCCTCCCATTTTGGTGCTGCAGCAGCACCAAGGCG,Gly-GCC,111	4	0	1	0	43	0	0	0	0	0	0	0	15.6502	0	2.78871	0	289.939	0	0	0	0	0	0	0
tRF-1:16-Ser-TGA-1	GCAGCGATGGCCGAGT	tRF-5a	-	-	16	tRNA-Ser-TGA-1-1,GCAGCGATGGCCGAGTGGTTAAGGCGTTGGACTTGAAATCCAATGGGGTCTCCCCGCGCAGGTTCGAACCCTGCTCGCTGCGCCA,Ser-TGA,0	0	0	0	0	0	0	0	0	1	0	40	40	0	0	0	0	0	0	0	0	2.84869	0	175.131	78.1684
tRF-1:28-Gly-GCC-4	GCATAGGTGGTTCAGTGGTAGAATTCTT	tRF-5c	-	-	28	tRNA-Gly-GCC-4-1,GCATAGGTGGTTCAGTGGTAGAATTCTTGCCTGCCACGCAGGAGGCCCAGGTTTGATTCCTGGCCCATGCACCA,Gly-GCC,0	660	1773	781	1371	124	135	587	155	497	36	216	255	2582.29	2996.34	2177.98	5554.07	836.103	873.973	1836.78	675.605	1415.8	233.583	945.709	498.323
tRF-1:29-Gly-GCC-4	GCATAGGTGGTTCAGTGGTAGAATTCTTG	tRF-5c	-	-	29	tRNA-Gly-GCC-4-1,GCATAGGTGGTTCAGTGGTAGAATTCTTGCCTGCCACGCAGGAGGCCCAGGTTTGATTCCTGGCCCATGCACCA,Gly-GCC,0	2	10	5	4	0	2	1	2	3	1	4	24	7.82512	16.8998	13.9435	16.2044	0	12.9477	3.1291	8.71748	8.54608	6.48841	17.5131	46.901
tRF-1:30-Gly-GCC-4	GCATAGGTGGTTCAGTGGTAGAATTCTTGC	tRF-5c	-	-	30	tRNA-Gly-GCC-4-1,GCATAGGTGGTTCAGTGGTAGAATTCTTGCCTGCCACGCAGGAGGCCCAGGTTTGATTCCTGGCCCATGCACCA,Gly-GCC,0	32	94	56	99	15	35	58	37	88	8	15	163	125.202	158.858	156.168	401.06	101.142	226.586	181.488	161.273	250.685	51.9073	65.6743	318.536
tRF-1:31-Gly-GCC-4	GCATAGGTGGTTCAGTGGTAGAATTCTTGCC	tRF-5c	-	-	31	tRNA-Gly-GCC-4-1,GCATAGGTGGTTCAGTGGTAGAATTCTTGCCTGCCACGCAGGAGGCCCAGGTTTGATTCCTGGCCCATGCACCA,Gly-GCC,0	54	246	113	31	4	8	45	22	74	7	43	227	211.278	415.736	315.124	125.584	26.9711	51.791	140.809	95.8923	210.803	45.4189	188.266	443.605
tRF-1:32-Gly-GCC-4	GCATAGGTGGTTCAGTGGTAGAATTCTTGCCT	tRF-5c	-	-	32	tRNA-Gly-GCC-4-1,GCATAGGTGGTTCAGTGGTAGAATTCTTGCCTGCCACGCAGGAGGCCCAGGTTTGATTCCTGGCCCATGCACCA,Gly-GCC,0	1	1	2	2	0	2	3	2	3	2	60	15	3.91256	1.68998	5.57742	8.10222	0	12.9477	9.38729	8.71748	8.54608	12.9768	262.697	29.3131
tiRNA-1:33-Gly-GCC-4	GCATAGGTGGTTCAGTGGTAGAATTCTTGCCTG	tiRNA-5	-	-	33	tRNA-Gly-GCC-4-1,GCATAGGTGGTTCAGTGGTAGAATTCTTGCCTGCCACGCAGGAGGCCCAGGTTTGATTCCTGGCCCATGCACCA,Gly-GCC,0	0	0	0	0	0	0	0	0	1	0	8	2	0	0	0	0	0	0	0	0	2.84869	0	35.0263	3.90842
tRF-1:15-Gly-GCC-1	GCATGGGTGGTTCAG	tRF-5a	-	-	15	tRNA-Gly-GCC-1-1,GCATGGGTGGTTCAGTGGTAGAATTCTCGCCTGCCACGCGGGAGGCCCGGGTTCGATTCCCGGCCCATGCACCA,Gly-GCC,0	0	0	0	0	0	0	10	1	0	0	0	0	0	0	0	0	0	0	31.291	4.35874	0	0	0	0
tRF-1:16-Gly-GCC-1	GCATGGGTGGTTCAGT	tRF-5a	-	tRF-16-P4R8YPE	16	tRNA-Gly-GCC-1-1,GCATGGGTGGTTCAGTGGTAGAATTCTCGCCTGCCACGCGGGAGGCCCGGGTTCGATTCCCGGCCCATGCACCA,Gly-GCC,0	0	7	0	0	0	3	0	9	0	0	1	0	0	11.8299	0	0	0	19.4216	0	39.2287	0	0	4.37828	0
tRF-1:22-Gly-GCC-1	GCATGGGTGGTTCAGTGGTAGA	tRF-5b	5003b	tRF-22-P4R8YP9LL	22	tRNA-Gly-GCC-1-1,GCATGGGTGGTTCAGTGGTAGAATTCTCGCCTGCCACGCGGGAGGCCCGGGTTCGATTCCCGGCCCATGCACCA,Gly-GCC,0	18	9	1	0	0	10	12	40	24	10	0	0	70.4261	15.2098	2.78871	0	0	64.7387	37.5492	174.35	68.3687	64.8841	0	0
tRF-1:23-Gly-GCC-1	GCATGGGTGGTTCAGTGGTAGAA	tRF-5b	-	tRF-23-P4R8YP9LD6	23	tRNA-Gly-GCC-1-1,GCATGGGTGGTTCAGTGGTAGAATTCTCGCCTGCCACGCGGGAGGCCCGGGTTCGATTCCCGGCCCATGCACCA,Gly-GCC,0	0	12	6	3	32	0	21	26	13	0	0	0	0	20.2798	16.7322	12.1533	215.769	0	65.711	113.327	37.033	0	0	0
tRF-1:24-Gly-GCC-1	GCATGGGTGGTTCAGTGGTAGAAT	tRF-5b	-	tRF-24-P4R8YP9LH7	24	tRNA-Gly-GCC-1-1,GCATGGGTGGTTCAGTGGTAGAATTCTCGCCTGCCACGCGGGAGGCCCGGGTTCGATTCCCGGCCCATGCACCA,Gly-GCC,0	26	6	26	1	9	13	43	34	0	0	0	23	101.727	10.1399	72.5064	4.05111	60.6849	84.1604	134.551	148.197	0	0	0	44.9468
tRF-1:28-Gly-GCC-1	GCATGGGTGGTTCAGTGGTAGAATTCTC	tRF-5c	-	tRF-28-P4R8YP9LOND5	28	tRNA-Gly-GCC-1-1,GCATGGGTGGTTCAGTGGTAGAATTCTCGCCTGCCACGCGGGAGGCCCGGGTTCGATTCCCGGCCCATGCACCA,Gly-GCC,0	1465	659	1292	536	97	401	552	1014	1181	93	1222	588	5731.9	1113.7	3603.01	2171.39	654.049	2596.02	1727.26	4419.76	3364.31	603.422	5350.26	1149.07
tRF-1:29-Gly-GCC-1	GCATGGGTGGTTCAGTGGTAGAATTCTCG	tRF-5c	-	tRF-29-P4R8YP9LONHK	29	tRNA-Gly-GCC-1-1,GCATGGGTGGTTCAGTGGTAGAATTCTCGCCTGCCACGCGGGAGGCCCGGGTTCGATTCCCGGCCCATGCACCA,Gly-GCC,0	223	163	249	96	16	107	140	263	304	55	383	617	872.501	275.467	694.388	388.906	107.884	692.705	438.074	1146.35	866.003	356.862	1676.88	1205.75
tRF-1:30-Gly-GCC-1	GCATGGGTGGTTCAGTGGTAGAATTCTCGC	tRF-5c	-	tRF-30-P4R8YP9LON4V	30	tRNA-Gly-GCC-1-1,GCATGGGTGGTTCAGTGGTAGAATTCTCGCCTGCCACGCGGGAGGCCCGGGTTCGATTCCCGGCCCATGCACCA,Gly-GCC,0	698	1473	831	853	373	568	1031	699	1512	164	2056	2832	2730.97	2489.34	2317.42	3455.6	2515.05	3677.16	3226.1	3046.76	4307.23	1064.1	9001.75	5534.32
tRF-1:31-Gly-GCC-1	GCATGGGTGGTTCAGTGGTAGAATTCTCGCC	tRF-5c	5003c	tRF-31-P4R8YP9LON4VD	31	tRNA-Gly-GCC-1-1,GCATGGGTGGTTCAGTGGTAGAATTCTCGCCTGCCACGCGGGAGGCCCGGGTTCGATTCCCGGCCCATGCACCA,Gly-GCC,0	971	4747	964	383	144	192	740	576	1538	230	3437	6445	3799.1	8022.35	2688.31	1551.57	970.959	1242.98	2315.53	2510.64	4381.29	1492.33	15048.2	12594.9
tRF-1:32-Gly-GCC-1	GCATGGGTGGTTCAGTGGTAGAATTCTCGCCT	tRF-5c	-	tRF-32-P4R8YP9LON4V3	32	tRNA-Gly-GCC-1-1,GCATGGGTGGTTCAGTGGTAGAATTCTCGCCTGCCACGCGGGAGGCCCGGGTTCGATTCCCGGCCCATGCACCA,Gly-GCC,0	106	98	100	70	44	62	103	198	192	64	4530	1726	414.732	165.618	278.871	283.578	296.682	401.38	322.297	863.031	546.949	415.258	19833.6	3372.96
tiRNA-1:33-Gly-GCC-1	GCATGGGTGGTTCAGTGGTAGAATTCTCGCCTG	tiRNA-5	-	tRF-33-P4R8YP9LON4VDP	33	tRNA-Gly-GCC-1-1,GCATGGGTGGTTCAGTGGTAGAATTCTCGCCTGCCACGCGGGAGGCCCGGGTTCGATTCCCGGCCCATGCACCA,Gly-GCC,0	15	2	11	4	2	11	30	59	30	15	695	147	58.6884	3.37997	30.6758	16.2044	13.4855	71.2126	93.8729	257.166	85.4608	97.3261	3042.91	287.269
tRF-1:14-Gly-CCC-1-M5	GCATTGGTGGTTCA	tRF-5a	-	-	14	tRNA-Gly-CCC-1-1,GCATTGGTGGTTCAGTGGTAGAATTCTCGCCTCCCACGCGGGAGACCCGGGTTCAATTCCCGGCCAATGCACCA,Gly-CCC,0;tRNA-Gly-CCC-3-1,GCATTGGTGGTTCAATGGTAGAATTCTCGCCTCCCACGCAGGAGACCCAGGTTCGATTCCTGGCCAATGCACCA,Gly-CCC,0;tRNA-Gly-GCC-2-1,GCATTGGTGGTTCAGTGGTAGAATTCTCGCCTGCCACGCGGGAGGCCCGGGTTCGATTCCCGGCCAATGCACCA,Gly-GCC,0;tRNA-Gly-GCC-3-1,GCATTGGTGGTTCAGTGGTAGAATTCTCGCCTGCCACGCGGGAGGCCCGGGTTTGATTCCCGGCCAGTGCACCA,G…	0	0	2	0	0	0	0	13	3	0	0	0	0	0	5.57742	0	0	0	0	56.6636	8.54608	0	0	0
tRF-1:28-Gly-CCC-3	GCATTGGTGGTTCAATGGTAGAATTCTC	tRF-5c	-	-	28	tRNA-Gly-CCC-3-1,GCATTGGTGGTTCAATGGTAGAATTCTCGCCTCCCACGCAGGAGACCCAGGTTCGATTCCTGGCCAATGCACCA,Gly-CCC,0	11	53	10	22	2	10	10	4	18	0	2	6	43.0382	89.5691	27.8871	89.1244	13.4855	64.7387	31.291	17.435	51.2765	0	8.75657	11.7253
tRF-1:30-Gly-CCC-3	GCATTGGTGGTTCAATGGTAGAATTCTCGC	tRF-5c	-	tRF-30-PNR8YO9LON4V	30	tRNA-Gly-CCC-3-1,GCATTGGTGGTTCAATGGTAGAATTCTCGCCTCCCACGCAGGAGACCCAGGTTCGATTCCTGGCCAATGCACCA,Gly-CCC,0	23	88	46	122	15	30	86	34	60	10	13	114	89.9889	148.718	128.281	494.235	101.142	194.216	269.102	148.197	170.922	64.8841	56.9177	222.78
tRF-1:31-Gly-CCC-3	GCATTGGTGGTTCAATGGTAGAATTCTCGCC	tRF-5c	-	-	31	tRNA-Gly-CCC-3-1,GCATTGGTGGTTCAATGGTAGAATTCTCGCCTCCCACGCAGGAGACCCAGGTTCGATTCCTGGCCAATGCACCA,Gly-CCC,0	59	187	80	37	6	18	40	24	74	4	181	259	230.841	316.027	223.097	149.891	40.4566	116.53	125.164	104.61	210.803	25.9536	792.469	506.14
tRF-1:32-Gly-CCC-3	GCATTGGTGGTTCAATGGTAGAATTCTCGCCT	tRF-5c	-	tRF-32-PNR8YO9LON4V3	32	tRNA-Gly-CCC-3-1,GCATTGGTGGTTCAATGGTAGAATTCTCGCCTCCCACGCAGGAGACCCAGGTTCGATTCCTGGCCAATGCACCA,Gly-CCC,0	2	2	2	2	0	2	4	8	4	0	20	15	7.82512	3.37997	5.57742	8.10222	0	12.9477	12.5164	34.8699	11.3948	0	87.5657	29.3131
tiRNA-1:33-Gly-CCC-3	GCATTGGTGGTTCAATGGTAGAATTCTCGCCTC	tiRNA-5	-	-	33	tRNA-Gly-CCC-3-1,GCATTGGTGGTTCAATGGTAGAATTCTCGCCTCCCACGCAGGAGACCCAGGTTCGATTCCTGGCCAATGCACCA,Gly-CCC,0	1	0	1	0	0	2	3	6	3	0	4	0	3.91256	0	2.78871	0	0	12.9477	9.38729	26.1525	8.54608	0	17.5131	0
tRF-1:15-Gly-CCC-1-M4	GCATTGGTGGTTCAG	tRF-5a	-	-	15	tRNA-Gly-CCC-1-1,GCATTGGTGGTTCAGTGGTAGAATTCTCGCCTCCCACGCGGGAGACCCGGGTTCAATTCCCGGCCAATGCACCA,Gly-CCC,0;tRNA-Gly-GCC-2-1,GCATTGGTGGTTCAGTGGTAGAATTCTCGCCTGCCACGCGGGAGGCCCGGGTTCGATTCCCGGCCAATGCACCA,Gly-GCC,0;tRNA-Gly-GCC-3-1,GCATTGGTGGTTCAGTGGTAGAATTCTCGCCTGCCACGCGGGAGGCCCGGGTTTGATTCCCGGCCAGTGCACCA,Gly-GCC,0;tRNA-Gly-GCC-5-1,GCATTGGTGGTTCAGTGGTAGAATTCTCGCCTGCCATGCGGGCGGCCGGGCTTCGATTCCTGGCCAATGCACCA,G…	3	1	0	0	0	0	0	23	0	0	0	0	11.7377	1.68998	0	0	0	0	0	100.251	0	0	0	0
tRF-1:16-Gly-CCC-1-M4	GCATTGGTGGTTCAGT	tRF-5a	-	tRF-16-PNR8YPE	16	tRNA-Gly-CCC-1-1,GCATTGGTGGTTCAGTGGTAGAATTCTCGCCTCCCACGCGGGAGACCCGGGTTCAATTCCCGGCCAATGCACCA,Gly-CCC,0;tRNA-Gly-GCC-2-1,GCATTGGTGGTTCAGTGGTAGAATTCTCGCCTGCCACGCGGGAGGCCCGGGTTCGATTCCCGGCCAATGCACCA,Gly-GCC,0;tRNA-Gly-GCC-3-1,GCATTGGTGGTTCAGTGGTAGAATTCTCGCCTGCCACGCGGGAGGCCCGGGTTTGATTCCCGGCCAGTGCACCA,Gly-GCC,0;tRNA-Gly-GCC-5-1,GCATTGGTGGTTCAGTGGTAGAATTCTCGCCTGCCATGCGGGCGGCCGGGCTTCGATTCCTGGCCAATGCACCA,G…	28	7	15	12	0	0	21	2	5	0	1	0	109.552	11.8299	41.8306	48.6133	0	0	65.711	8.71748	14.2435	0	4.37828	0
tRF-1:22-Gly-CCC-1-M4	GCATTGGTGGTTCAGTGGTAGA	tRF-5b	5004b	tRF-22-PNR8YP9LL	22	tRNA-Gly-CCC-1-1,GCATTGGTGGTTCAGTGGTAGAATTCTCGCCTCCCACGCGGGAGACCCGGGTTCAATTCCCGGCCAATGCACCA,Gly-CCC,0;tRNA-Gly-GCC-2-1,GCATTGGTGGTTCAGTGGTAGAATTCTCGCCTGCCACGCGGGAGGCCCGGGTTCGATTCCCGGCCAATGCACCA,Gly-GCC,0;tRNA-Gly-GCC-3-1,GCATTGGTGGTTCAGTGGTAGAATTCTCGCCTGCCACGCGGGAGGCCCGGGTTTGATTCCCGGCCAGTGCACCA,Gly-GCC,0;tRNA-Gly-GCC-5-1,GCATTGGTGGTTCAGTGGTAGAATTCTCGCCTGCCATGCGGGCGGCCGGGCTTCGATTCCTGGCCAATGCACCA,G…	35	56	18	35	0	2	47	25	79	0	0	0	136.94	94.639	50.1967	141.789	0	12.9477	147.068	108.969	225.047	0	0	0
tRF-1:23-Gly-CCC-1-M4	GCATTGGTGGTTCAGTGGTAGAA	tRF-5b	-	tRF-23-PNR8YP9LD6	23	tRNA-Gly-CCC-1-1,GCATTGGTGGTTCAGTGGTAGAATTCTCGCCTCCCACGCGGGAGACCCGGGTTCAATTCCCGGCCAATGCACCA,Gly-CCC,0;tRNA-Gly-GCC-2-1,GCATTGGTGGTTCAGTGGTAGAATTCTCGCCTGCCACGCGGGAGGCCCGGGTTCGATTCCCGGCCAATGCACCA,Gly-GCC,0;tRNA-Gly-GCC-3-1,GCATTGGTGGTTCAGTGGTAGAATTCTCGCCTGCCACGCGGGAGGCCCGGGTTTGATTCCCGGCCAGTGCACCA,Gly-GCC,0;tRNA-Gly-GCC-5-1,GCATTGGTGGTTCAGTGGTAGAATTCTCGCCTGCCATGCGGGCGGCCGGGCTTCGATTCCTGGCCAATGCACCA,G…	3	15	6	0	0	0	0	6	0	1	0	8	11.7377	25.3497	16.7322	0	0	0	0	26.1525	0	6.48841	0	15.6337
tRF-1:24-Gly-CCC-1-M4	GCATTGGTGGTTCAGTGGTAGAAT	tRF-5b	-	tRF-24-PNR8YP9LH7	24	tRNA-Gly-CCC-1-1,GCATTGGTGGTTCAGTGGTAGAATTCTCGCCTCCCACGCGGGAGACCCGGGTTCAATTCCCGGCCAATGCACCA,Gly-CCC,0;tRNA-Gly-GCC-2-1,GCATTGGTGGTTCAGTGGTAGAATTCTCGCCTGCCACGCGGGAGGCCCGGGTTCGATTCCCGGCCAATGCACCA,Gly-GCC,0;tRNA-Gly-GCC-3-1,GCATTGGTGGTTCAGTGGTAGAATTCTCGCCTGCCACGCGGGAGGCCCGGGTTTGATTCCCGGCCAGTGCACCA,Gly-GCC,0;tRNA-Gly-GCC-5-1,GCATTGGTGGTTCAGTGGTAGAATTCTCGCCTGCCATGCGGGCGGCCGGGCTTCGATTCCTGGCCAATGCACCA,G…	21	64	32	19	1	0	14	60	50	0	0	0	82.1638	108.159	89.2387	76.9711	6.74277	0	43.8074	261.525	142.435	0	0	0
tRF-1:28-Gly-CCC-1-M4	GCATTGGTGGTTCAGTGGTAGAATTCTC	tRF-5c	-	tRF-28-PNR8YP9LOND5	28	tRNA-Gly-CCC-1-1,GCATTGGTGGTTCAGTGGTAGAATTCTCGCCTCCCACGCGGGAGACCCGGGTTCAATTCCCGGCCAATGCACCA,Gly-CCC,0;tRNA-Gly-GCC-2-1,GCATTGGTGGTTCAGTGGTAGAATTCTCGCCTGCCACGCGGGAGGCCCGGGTTCGATTCCCGGCCAATGCACCA,Gly-GCC,0;tRNA-Gly-GCC-3-1,GCATTGGTGGTTCAGTGGTAGAATTCTCGCCTGCCACGCGGGAGGCCCGGGTTTGATTCCCGGCCAGTGCACCA,Gly-GCC,0;tRNA-Gly-GCC-5-1,GCATTGGTGGTTCAGTGGTAGAATTCTCGCCTGCCATGCGGGCGGCCGGGCTTCGATTCCTGGCCAATGCACCA,G…	10442	46085	21137	21205	2100	4170	6321	5622	11534	776	2597	5226	40855	77882.9	58944.9	85903.8	14159.8	26996.1	19779	24504.8	32856.8	5035	11370.4	10212.7
tRF-1:29-Gly-CCC-1-M4	GCATTGGTGGTTCAGTGGTAGAATTCTCG	tRF-5c	-	tRF-29-PNR8YP9LONHK	29	tRNA-Gly-CCC-1-1,GCATTGGTGGTTCAGTGGTAGAATTCTCGCCTCCCACGCGGGAGACCCGGGTTCAATTCCCGGCCAATGCACCA,Gly-CCC,0;tRNA-Gly-GCC-2-1,GCATTGGTGGTTCAGTGGTAGAATTCTCGCCTGCCACGCGGGAGGCCCGGGTTCGATTCCCGGCCAATGCACCA,Gly-GCC,0;tRNA-Gly-GCC-3-1,GCATTGGTGGTTCAGTGGTAGAATTCTCGCCTGCCACGCGGGAGGCCCGGGTTTGATTCCCGGCCAGTGCACCA,Gly-GCC,0;tRNA-Gly-GCC-5-1,GCATTGGTGGTTCAGTGGTAGAATTCTCGCCTGCCATGCGGGCGGCCGGGCTTCGATTCCTGGCCAATGCACCA,G…	1449	4977	2344	1998	263	619	1061	1320	1613	308	964	2760	5669.3	8411.04	6536.73	8094.12	1773.35	4007.33	3319.97	5753.54	4594.94	1998.43	4220.67	5393.62
tRF-1:30-Gly-CCC-1-M4	GCATTGGTGGTTCAGTGGTAGAATTCTCGC	tRF-5c	-	tRF-30-PNR8YP9LON4V	30	tRNA-Gly-CCC-1-1,GCATTGGTGGTTCAGTGGTAGAATTCTCGCCTCCCACGCGGGAGACCCGGGTTCAATTCCCGGCCAATGCACCA,Gly-CCC,0;tRNA-Gly-GCC-2-1,GCATTGGTGGTTCAGTGGTAGAATTCTCGCCTGCCACGCGGGAGGCCCGGGTTCGATTCCCGGCCAATGCACCA,Gly-GCC,0;tRNA-Gly-GCC-3-1,GCATTGGTGGTTCAGTGGTAGAATTCTCGCCTGCCACGCGGGAGGCCCGGGTTTGATTCCCGGCCAGTGCACCA,Gly-GCC,0;tRNA-Gly-GCC-5-1,GCATTGGTGGTTCAGTGGTAGAATTCTCGCCTGCCATGCGGGCGGCCGGGCTTCGATTCCTGGCCAATGCACCA,G…	30357	77663	47469	83616	15768	26982	46927	29501	59573	4605	10765	108745	118774	131249	132377	338738	106320	174678	146839	128587	169705	29879.1	47132.2	212510
tRF-1:31-Gly-CCC-1-M4	GCATTGGTGGTTCAGTGGTAGAATTCTCGCC	tRF-5c	5004c	tRF-31-PNR8YP9LON4VD	31	tRNA-Gly-CCC-1-1,GCATTGGTGGTTCAGTGGTAGAATTCTCGCCTCCCACGCGGGAGACCCGGGTTCAATTCCCGGCCAATGCACCA,Gly-CCC,0;tRNA-Gly-GCC-2-1,GCATTGGTGGTTCAGTGGTAGAATTCTCGCCTGCCACGCGGGAGGCCCGGGTTCGATTCCCGGCCAATGCACCA,Gly-GCC,0;tRNA-Gly-GCC-3-1,GCATTGGTGGTTCAGTGGTAGAATTCTCGCCTGCCACGCGGGAGGCCCGGGTTTGATTCCCGGCCAGTGCACCA,Gly-GCC,0;tRNA-Gly-GCC-5-1,GCATTGGTGGTTCAGTGGTAGAATTCTCGCCTGCCATGCGGGCGGCCGGGCTTCGATTCCTGGCCAATGCACCA,G…	59064	213522	85914	35080	4447	8397	29178	17560	55678	4392	26252	133851	231092	360849	239589	142113	29985.1	54361.1	91300.8	76539.5	158610	28497.1	114939	261573
tRF-1:32-Gly-CCC-1-M4	GCATTGGTGGTTCAGTGGTAGAATTCTCGCCT	tRF-5c	-	tRF-32-PNR8YP9LON4V3	32	tRNA-Gly-CCC-1-1,GCATTGGTGGTTCAGTGGTAGAATTCTCGCCTCCCACGCGGGAGACCCGGGTTCAATTCCCGGCCAATGCACCA,Gly-CCC,0;tRNA-Gly-GCC-2-1,GCATTGGTGGTTCAGTGGTAGAATTCTCGCCTGCCACGCGGGAGGCCCGGGTTCGATTCCCGGCCAATGCACCA,Gly-GCC,0;tRNA-Gly-GCC-3-1,GCATTGGTGGTTCAGTGGTAGAATTCTCGCCTGCCACGCGGGAGGCCCGGGTTTGATTCCCGGCCAGTGCACCA,Gly-GCC,0;tRNA-Gly-GCC-5-1,GCATTGGTGGTTCAGTGGTAGAATTCTCGCCTGCCATGCGGGCGGCCGGGCTTCGATTCCTGGCCAATGCACCA,G…	1930	1731	2062	1342	292	596	1740	1594	1561	436	17472	11916	7551.24	2925.36	5750.32	5436.59	1968.89	3858.43	5444.63	6947.83	4446.81	2828.95	76497.4	23286.4
tiRNA-1:33-Gly-CCC-1	GCATTGGTGGTTCAGTGGTAGAATTCTCGCCTC	tiRNA-5	-	tRF-33-PNR8YP9LON4VD5	33	tRNA-Gly-CCC-1-1,GCATTGGTGGTTCAGTGGTAGAATTCTCGCCTCCCACGCGGGAGACCCGGGTTCAATTCCCGGCCAATGCACCA,Gly-CCC,0	26	3	4	8	2	8	35	32	15	13	202	124	101.727	5.06995	11.1548	32.4089	13.4855	51.791	109.518	139.48	42.7304	84.3493	884.413	242.322
tiRNA-1:33-Gly-GCC-2-M3	GCATTGGTGGTTCAGTGGTAGAATTCTCGCCTG	tiRNA-5	-	tRF-33-PNR8YP9LON4VDP	33	tRNA-Gly-GCC-2-1,GCATTGGTGGTTCAGTGGTAGAATTCTCGCCTGCCACGCGGGAGGCCCGGGTTCGATTCCCGGCCAATGCACCA,Gly-GCC,0;tRNA-Gly-GCC-3-1,GCATTGGTGGTTCAGTGGTAGAATTCTCGCCTGCCACGCGGGAGGCCCGGGTTTGATTCCCGGCCAGTGCACCA,Gly-GCC,0;tRNA-Gly-GCC-5-1,GCATTGGTGGTTCAGTGGTAGAATTCTCGCCTGCCATGCGGGCGGCCGGGCTTCGATTCCTGGCCAATGCACCA,Gly-GCC,0	144	32	72	48	24	79	288	325	183	107	3174	1260	563.409	54.0794	200.787	194.453	161.826	511.436	901.18	1416.59	521.311	694.26	13896.7	2462.3
tRF-1:30-His-GTG-2	GCCATGATCGTATAGTGGTTAGTACTCTGC	tRF-5c	-	-	30	tRNA-His-GTG-2-1,GCCATGATCGTATAGTGGTTAGTACTCTGCGCTGTGGCCGCAGCAACCTCGGTTCGAATCCGAGTCACGGCACCA,His-GTG,0	0	6	2	0	0	0	0	0	2	2	46	2	0	10.1399	5.57742	0	0	0	0	0	5.69739	12.9768	201.401	3.90842
tRF-1:31-His-GTG-2	GCCATGATCGTATAGTGGTTAGTACTCTGCG	tRF-5c	-	-	31	tRNA-His-GTG-2-1,GCCATGATCGTATAGTGGTTAGTACTCTGCGCTGTGGCCGCAGCAACCTCGGTTCGAATCCGAGTCACGGCACCA,His-GTG,0	3	71	4	0	1	0	2	4	2	0	9	28	11.7377	119.989	11.1548	0	6.74277	0	6.25819	17.435	5.69739	0	39.4046	54.7179
tRF-1:32-His-GTG-2	GCCATGATCGTATAGTGGTTAGTACTCTGCGC	tRF-5c	-	-	32	tRNA-His-GTG-2-1,GCCATGATCGTATAGTGGTTAGTACTCTGCGCTGTGGCCGCAGCAACCTCGGTTCGAATCCGAGTCACGGCACCA,His-GTG,0	2	136	10	3	1	0	2	0	6	0	6	12	7.82512	229.838	27.8871	12.1533	6.74277	0	6.25819	0	17.0922	0	26.2697	23.4505
tRF-60:77-Asn-GTT-2-M4	GCCCACCCAGGGACGCCA	tRF-3a	-	tRF-18-P6KP6HD2	18	tRNA-Asn-GTT-2-1,GTCTCTGTGGCGCAATCGGTTAGCGCGTTCGGCTGTTAACCGAAAGGTTGGTGGTTCGAGCCCACCCAGGGACGCCA,Asn-GTT,59;tRNA-Asn-GTT-3-1,GTCTCTGTGGCGCAATCGGTTAGCGCATTCGGCTGTTAACCGAAAGGTTGGTGGTTCGAGCCCACCCAGGGACGCCA,Asn-GTT,59;tRNA-Asn-GTT-4-1,GTCTCTGTGGCGCAATCGGTTAGCGCGTTCGGCTGTTAACCGAAAGATTGGTGGTTCGAGCCCACCCAGGGACGCCA,Asn-GTT,59;tRNA-Asn-GTT-5-1,GTCTCTGTGGCGCAATCGGTTAGCGCGTTCGGCTGTTAACTGAAAGGTTGGTGGTTCGAGCCCA…	0	0	0	7	0	0	0	0	1	0	0	0	0	0	0	28.3578	0	0	0	0	2.84869	0	0	0
tRF-59:76-Val-TAC-1-M3	GCCCCAGTGGAACCACCA	tRF-3a	-	tRF-18-PR18B6D2	18	tRNA-Val-TAC-1-1,GGTTCCATAGTGTAGTGGTTATCACGTCTGCTTTACACGCAGAAGGTCCTGGGTTCGAGCCCCAGTGGAACCACCA,Val-TAC,58;tRNA-Val-TAC-2-1,GGTTCCATAGTGTAGCGGTTATCACGTCTGCTTTACACGCAGAAGGTCCTGGGTTCGAGCCCCAGTGGAACCACCA,Val-TAC,58;tRNA-Val-TAC-3-1,GGTTCCATAGTGTAGTGGTTATCACATCTGCTTTACACGCAGAAGGTCCTGGGTTCAAGCCCCAGTGGAACCACCA,Val-TAC,58	4	2	20	7	0	36	1	1	10	1	25	1	15.6502	3.37997	55.7742	28.3578	0	233.059	3.1291	4.35874	28.4869	6.48841	109.457	1.95421
tRF-1:15-Lys-CTT-9	GCCCGACTACCTCAG	tRF-5a	-	-	15	tRNA-Lys-CTT-9-1,GCCCGACTACCTCAGTCGGTGGAGCATGGGACTCTTCATCCCAGGGTTGTGGGTTCGAGCCCCACATTGGGCACCA,Lys-CTT,0	0	0	0	0	0	0	0	8	0	0	0	0	0	0	0	0	0	0	0	34.8699	0	0	0	0
tRF-60:76-Ala-AGC-8	GCCCGCATCCTCCACCA	tRF-3a	-	tRF-17-PSJR852	17	tRNA-Ala-AGC-8-1,GGGGGATTAGCTCAAATGGTAGAGCGCTCGCTTAGCATGCGAGAGGTAGCGGGATCGATGCCCGCATCCTCCACCA,Ala-AGC,59	7	0	4	0	0	10	0	0	1	0	0	0	27.3879	0	11.1548	0	0	64.7387	0	0	2.84869	0	0	0
tRF-60:76-Ala-AGC-11-M3	GCCCGCATTCTCCACCA	tRF-3a	-	tRF-17-PSJ9852	17	tRNA-Ala-AGC-11-1,GGGGAATTAGCTCAAATGGTAGAGCGCTCGCTTAGCATGCGAGAGGTAGCGGGATCGATGCCCGCATTCTCCACCA,Ala-AGC,59;tRNA-Ala-AGC-15-1,GGGGAATTAGCTCAAGTGGTAGAGCGCTCGCTTAGCATGCGAGAGGTAGTGGGATCGATGCCCGCATTCTCCACCA,Ala-AGC,59;tRNA-Ala-AGC-9-1,GGGGAATTAGCTCAGGCGGTAGAGCGCTCGCTTAGCATGCGAGAGGTAGCGGGATCGACGCCCGCATTCTCCACCA,Ala-AGC,59	0	0	0	1	0	0	0	1	1	58	0	0	0	0	0	4.05111	0	0	0	4.35874	2.84869	376.328	0	0
tRF-1:14-Lys-TTT-3-M2	GCCCGGATAGCTCA	tRF-5a	-	-	14	tRNA-Lys-TTT-3-1,GCCCGGATAGCTCAGTCGGTAGAGCATCAGACTTTTAATCTGAGGGTCCAGGGTTCAAGTCCCTGTTCGGGCGCCA,Lys-TTT,0;tRNA-Lys-TTT-5-1,GCCCGGATAGCTCAGTCGGTAGAGCATCAGACTTTTAATCTGAGGGTCCGGGGTTCAAGTCCCTGTTCGGGCGCCA,Lys-TTT,0	3	1	0	15	0	1	0	10	0	17	16	10	11.7377	1.68998	0	60.7666	0	6.47387	0	43.5874	0	110.303	70.0525	19.5421
tRF-1:15-Lys-TTT-3-M2	GCCCGGATAGCTCAG	tRF-5a	-	-	15	tRNA-Lys-TTT-3-1,GCCCGGATAGCTCAGTCGGTAGAGCATCAGACTTTTAATCTGAGGGTCCAGGGTTCAAGTCCCTGTTCGGGCGCCA,Lys-TTT,0;tRNA-Lys-TTT-5-1,GCCCGGATAGCTCAGTCGGTAGAGCATCAGACTTTTAATCTGAGGGTCCGGGGTTCAAGTCCCTGTTCGGGCGCCA,Lys-TTT,0	46	34	139	37	195	19	62	106	49	59	61	92	179.978	57.4594	387.63	149.891	1314.84	123.004	194.004	462.027	139.586	382.816	267.075	179.787
tRF-1:16-Lys-TTT-3-M2	GCCCGGATAGCTCAGT	tRF-5a	-	-	16	tRNA-Lys-TTT-3-1,GCCCGGATAGCTCAGTCGGTAGAGCATCAGACTTTTAATCTGAGGGTCCAGGGTTCAAGTCCCTGTTCGGGCGCCA,Lys-TTT,0;tRNA-Lys-TTT-5-1,GCCCGGATAGCTCAGTCGGTAGAGCATCAGACTTTTAATCTGAGGGTCCGGGGTTCAAGTCCCTGTTCGGGCGCCA,Lys-TTT,0	6	2	36	0	0	0	0	0	8	0	0	0	23.4754	3.37997	100.393	0	0	0	0	0	22.7896	0	0	0
tRF-1:22-Lys-TTT-3-M2	GCCCGGATAGCTCAGTCGGTAG	tRF-5b	-	tRF-22-PS5P4PW3H	22	tRNA-Lys-TTT-3-1,GCCCGGATAGCTCAGTCGGTAGAGCATCAGACTTTTAATCTGAGGGTCCAGGGTTCAAGTCCCTGTTCGGGCGCCA,Lys-TTT,0;tRNA-Lys-TTT-5-1,GCCCGGATAGCTCAGTCGGTAGAGCATCAGACTTTTAATCTGAGGGTCCGGGGTTCAAGTCCCTGTTCGGGCGCCA,Lys-TTT,0	0	2	13	0	23	1	0	1	4	1	0	33	0	3.37997	36.2532	0	155.084	6.47387	0	4.35874	11.3948	6.48841	0	64.4889
tRF-1:23-Lys-TTT-3-M2	GCCCGGATAGCTCAGTCGGTAGA	tRF-5b	-	tRF-23-PS5P4PW3X	23	tRNA-Lys-TTT-3-1,GCCCGGATAGCTCAGTCGGTAGAGCATCAGACTTTTAATCTGAGGGTCCAGGGTTCAAGTCCCTGTTCGGGCGCCA,Lys-TTT,0;tRNA-Lys-TTT-5-1,GCCCGGATAGCTCAGTCGGTAGAGCATCAGACTTTTAATCTGAGGGTCCGGGGTTCAAGTCCCTGTTCGGGCGCCA,Lys-TTT,0	1	0	11	3	0	0	1	2	17	33	10	21	3.91256	0	30.6758	12.1533	0	0	3.1291	8.71748	48.4278	214.117	43.7828	41.0384
tRF-1:24-Lys-TTT-3-M2	GCCCGGATAGCTCAGTCGGTAGAG	tRF-5b	-	tRF-24-PS5P4PW3ES	24	tRNA-Lys-TTT-3-1,GCCCGGATAGCTCAGTCGGTAGAGCATCAGACTTTTAATCTGAGGGTCCAGGGTTCAAGTCCCTGTTCGGGCGCCA,Lys-TTT,0;tRNA-Lys-TTT-5-1,GCCCGGATAGCTCAGTCGGTAGAGCATCAGACTTTTAATCTGAGGGTCCGGGGTTCAAGTCCCTGTTCGGGCGCCA,Lys-TTT,0	11	0	4	0	0	0	11	23	20	0	0	0	43.0382	0	11.1548	0	0	0	34.4201	100.251	56.9739	0	0	0
tRF-1:28-Lys-TTT-3-M2	GCCCGGATAGCTCAGTCGGTAGAGCATC	tRF-5c	-	tRF-28-PS5P4PW3FJDD	28	tRNA-Lys-TTT-3-1,GCCCGGATAGCTCAGTCGGTAGAGCATCAGACTTTTAATCTGAGGGTCCAGGGTTCAAGTCCCTGTTCGGGCGCCA,Lys-TTT,0;tRNA-Lys-TTT-5-1,GCCCGGATAGCTCAGTCGGTAGAGCATCAGACTTTTAATCTGAGGGTCCGGGGTTCAAGTCCCTGTTCGGGCGCCA,Lys-TTT,0	11	35	24	17	11	12	16	13	74	0	0	31	43.0382	59.1494	66.929	68.8688	74.1705	77.6865	50.0656	56.6636	210.803	0	0	60.5805
tRF-1:29-Lys-TTT-3-M2	GCCCGGATAGCTCAGTCGGTAGAGCATCA	tRF-5c	-	tRF-29-PS5P4PW3FJF2	29	tRNA-Lys-TTT-3-1,GCCCGGATAGCTCAGTCGGTAGAGCATCAGACTTTTAATCTGAGGGTCCAGGGTTCAAGTCCCTGTTCGGGCGCCA,Lys-TTT,0;tRNA-Lys-TTT-5-1,GCCCGGATAGCTCAGTCGGTAGAGCATCAGACTTTTAATCTGAGGGTCCGGGGTTCAAGTCCCTGTTCGGGCGCCA,Lys-TTT,0	2	1	0	2	0	2	0	0	8	6	0	0	7.82512	1.68998	0	8.10222	0	12.9477	0	0	22.7896	38.9305	0	0
tRF-1:30-Lys-TTT-3-M2	GCCCGGATAGCTCAGTCGGTAGAGCATCAG	tRF-5c	-	tRF-30-PS5P4PW3FJHP	30	tRNA-Lys-TTT-3-1,GCCCGGATAGCTCAGTCGGTAGAGCATCAGACTTTTAATCTGAGGGTCCAGGGTTCAAGTCCCTGTTCGGGCGCCA,Lys-TTT,0;tRNA-Lys-TTT-5-1,GCCCGGATAGCTCAGTCGGTAGAGCATCAGACTTTTAATCTGAGGGTCCGGGGTTCAAGTCCCTGTTCGGGCGCCA,Lys-TTT,0	24	26	15	20	0	10	38	10	50	3	44	45	93.9015	43.9396	41.8306	81.0222	0	64.7387	118.906	43.5874	142.435	19.4652	192.644	87.9394
tRF-1:31-Lys-TTT-3-M2	GCCCGGATAGCTCAGTCGGTAGAGCATCAGA	tRF-5c	5005c	tRF-31-PS5P4PW3FJHPB	31	tRNA-Lys-TTT-3-1,GCCCGGATAGCTCAGTCGGTAGAGCATCAGACTTTTAATCTGAGGGTCCAGGGTTCAAGTCCCTGTTCGGGCGCCA,Lys-TTT,0;tRNA-Lys-TTT-5-1,GCCCGGATAGCTCAGTCGGTAGAGCATCAGACTTTTAATCTGAGGGTCCGGGGTTCAAGTCCCTGTTCGGGCGCCA,Lys-TTT,0	17	31	4	10	0	4	8	9	28	2	3	44	66.5136	52.3895	11.1548	40.5111	0	25.8955	25.0328	39.2287	79.7634	12.9768	13.1349	85.9852
tRF-1:32-Lys-TTT-3-M2	GCCCGGATAGCTCAGTCGGTAGAGCATCAGAC	tRF-5c	-	tRF-32-PS5P4PW3FJHP1	32	tRNA-Lys-TTT-3-1,GCCCGGATAGCTCAGTCGGTAGAGCATCAGACTTTTAATCTGAGGGTCCAGGGTTCAAGTCCCTGTTCGGGCGCCA,Lys-TTT,0;tRNA-Lys-TTT-5-1,GCCCGGATAGCTCAGTCGGTAGAGCATCAGACTTTTAATCTGAGGGTCCGGGGTTCAAGTCCCTGTTCGGGCGCCA,Lys-TTT,0	56	162	28	30	19	21	46	36	175	20	48	198	219.103	273.777	78.0838	121.533	128.113	135.951	143.938	156.915	498.522	129.768	210.158	386.933
tiRNA-1:34-Lys-TTT-3-M2	GCCCGGATAGCTCAGTCGGTAGAGCATCAGACTT	tiRNA-5	-	tRF-34-PS5P4PW3FJHPEQ	34	tRNA-Lys-TTT-3-1,GCCCGGATAGCTCAGTCGGTAGAGCATCAGACTTTTAATCTGAGGGTCCAGGGTTCAAGTCCCTGTTCGGGCGCCA,Lys-TTT,0;tRNA-Lys-TTT-5-1,GCCCGGATAGCTCAGTCGGTAGAGCATCAGACTTTTAATCTGAGGGTCCGGGGTTCAAGTCCCTGTTCGGGCGCCA,Lys-TTT,0	3	0	0	1	2	0	0	6	0	0	32	1	11.7377	0	0	4.05111	13.4855	0	0	26.1525	0	0	140.105	1.95421
tRF-1:14-SeC-TCA-1	GCCCGGATGATCCT	tRF-5a	-	-	14	tRNA-SeC-TCA-1-1,GCCCGGATGATCCTCAGTGGTCTGGGGTGCAGGCTTCAAACCTGTAGCTGTCTAGCGACAGAGTGGTTCAATTCCACCTTTCGGGCGCCA,SeC-TCA,0	1	14	0	1	1	0	0	0	0	0	0	0	3.91256	23.6598	0	4.05111	6.74277	0	0	0	0	0	0	0
tRF-1:15-SeC-TCA-1	GCCCGGATGATCCTC	tRF-5a	-	-	15	tRNA-SeC-TCA-1-1,GCCCGGATGATCCTCAGTGGTCTGGGGTGCAGGCTTCAAACCTGTAGCTGTCTAGCGACAGAGTGGTTCAATTCCACCTTTCGGGCGCCA,SeC-TCA,0	33	21	82	20	163	32	17	51	8	43	96	53	129.115	35.4896	228.674	81.0222	1099.07	207.164	53.1947	222.296	22.7896	279.002	420.315	103.573
tRF-1:16-SeC-TCA-1	GCCCGGATGATCCTCA	tRF-5a	-	-	16	tRNA-SeC-TCA-1-1,GCCCGGATGATCCTCAGTGGTCTGGGGTGCAGGCTTCAAACCTGTAGCTGTCTAGCGACAGAGTGGTTCAATTCCACCTTTCGGGCGCCA,SeC-TCA,0	2	4	28	14	0	0	0	5	11	57	2	0	7.82512	6.75993	78.0838	56.7155	0	0	0	21.7937	31.3356	369.839	8.75657	0
tRF-1:22-SeC-TCA-1	GCCCGGATGATCCTCAGTGGTC	tRF-5b	-	-	22	tRNA-SeC-TCA-1-1,GCCCGGATGATCCTCAGTGGTCTGGGGTGCAGGCTTCAAACCTGTAGCTGTCTAGCGACAGAGTGGTTCAATTCCACCTTTCGGGCGCCA,SeC-TCA,0	1	0	8	3	0	4	0	0	0	0	0	0	3.91256	0	22.3097	12.1533	0	25.8955	0	0	0	0	0	0
tRF-1:30-SeC-TCA-1	GCCCGGATGATCCTCAGTGGTCTGGGGTGC	tRF-5c	-	-	30	tRNA-SeC-TCA-1-1,GCCCGGATGATCCTCAGTGGTCTGGGGTGCAGGCTTCAAACCTGTAGCTGTCTAGCGACAGAGTGGTTCAATTCCACCTTTCGGGCGCCA,SeC-TCA,0	0	0	1	0	0	0	0	0	0	0	0	25	0	0	2.78871	0	0	0	0	0	0	0	0	48.8552
tiRNA-1:36-SeC-TCA-1	GCCCGGATGATCCTCAGTGGTCTGGGGTGCAGGCTT	tiRNA-5	-	-	36	tRNA-SeC-TCA-1-1,GCCCGGATGATCCTCAGTGGTCTGGGGTGCAGGCTTCAAACCTGTAGCTGTCTAGCGACAGAGTGGTTCAATTCCACCTTTCGGGCGCCA,SeC-TCA,0	0	0	0	0	0	0	0	0	0	0	28	1	0	0	0	0	0	0	0	0	0	0	122.592	1.95421
tRF-1:15-Lys-CTT-1-M5	GCCCGGCTAGCTCAG	tRF-5a	5005a	-	15	tRNA-Lys-CTT-1-1,GCCCGGCTAGCTCAGTCGGTAGAGCATGGGACTCTTAATCCCAGGGTCGTGGGTTCGAGCCCCACGTTGGGCGCCA,Lys-CTT,0;tRNA-Lys-CTT-2-1,GCCCGGCTAGCTCAGTCGGTAGAGCATGAGACTCTTAATCTCAGGGTCGTGGGTTCGAGCCCCACGTTGGGCGCCA,Lys-CTT,0;tRNA-Lys-CTT-3-1,GCCCGGCTAGCTCAGTCGGTAGAGCATGAGACCCTTAATCTCAGGGTCGTGGGTTCGAGCCCCACGTTGGGCGCCA,Lys-CTT,0;tRNA-Lys-CTT-4-1,GCCCGGCTAGCTCAGTCGGTAGAGCATGGGACTCTTAATCTCAGGGTCGTGGGTTCGAGCCCCACGTTGG…	24	73	162	79	123	32	119	125	51	315	261	104	93.9015	123.369	451.771	320.038	829.361	207.164	372.363	544.843	145.283	2043.85	1142.73	203.238
tRF-1:16-Lys-CTT-1-M5	GCCCGGCTAGCTCAGT	tRF-5a	-	-	16	tRNA-Lys-CTT-1-1,GCCCGGCTAGCTCAGTCGGTAGAGCATGGGACTCTTAATCCCAGGGTCGTGGGTTCGAGCCCCACGTTGGGCGCCA,Lys-CTT,0;tRNA-Lys-CTT-2-1,GCCCGGCTAGCTCAGTCGGTAGAGCATGAGACTCTTAATCTCAGGGTCGTGGGTTCGAGCCCCACGTTGGGCGCCA,Lys-CTT,0;tRNA-Lys-CTT-3-1,GCCCGGCTAGCTCAGTCGGTAGAGCATGAGACCCTTAATCTCAGGGTCGTGGGTTCGAGCCCCACGTTGGGCGCCA,Lys-CTT,0;tRNA-Lys-CTT-4-1,GCCCGGCTAGCTCAGTCGGTAGAGCATGGGACTCTTAATCTCAGGGTCGTGGGTTCGAGCCCCACGTTGG…	2	5	9	9	14	0	0	19	1	0	1	0	7.82512	8.44991	25.0984	36.46	94.3988	0	0	82.8161	2.84869	0	4.37828	0
tRF-1:28-Lys-CTT-1-M4	GCCCGGCTAGCTCAGTCGGTAGAGCATG	tRF-5c	-	tRF-28-PSQP4PW3FJD0	28	tRNA-Lys-CTT-1-1,GCCCGGCTAGCTCAGTCGGTAGAGCATGGGACTCTTAATCCCAGGGTCGTGGGTTCGAGCCCCACGTTGGGCGCCA,Lys-CTT,0;tRNA-Lys-CTT-2-1,GCCCGGCTAGCTCAGTCGGTAGAGCATGAGACTCTTAATCTCAGGGTCGTGGGTTCGAGCCCCACGTTGGGCGCCA,Lys-CTT,0;tRNA-Lys-CTT-3-1,GCCCGGCTAGCTCAGTCGGTAGAGCATGAGACCCTTAATCTCAGGGTCGTGGGTTCGAGCCCCACGTTGGGCGCCA,Lys-CTT,0;tRNA-Lys-CTT-4-1,GCCCGGCTAGCTCAGTCGGTAGAGCATGGGACTCTTAATCTCAGGGTCGTGGGTTCGAGCCCCACGTTGG…	29	22	30	12	16	18	42	52	52	12	2	0	113.464	37.1796	83.6612	48.6133	107.884	116.53	131.422	226.655	148.132	77.8609	8.75657	0
tRF-1:29-Lys-CTT-2-M2	GCCCGGCTAGCTCAGTCGGTAGAGCATGA	tRF-5c	-	tRF-29-PSQP4PW3FJFL	29	tRNA-Lys-CTT-2-1,GCCCGGCTAGCTCAGTCGGTAGAGCATGAGACTCTTAATCTCAGGGTCGTGGGTTCGAGCCCCACGTTGGGCGCCA,Lys-CTT,0;tRNA-Lys-CTT-3-1,GCCCGGCTAGCTCAGTCGGTAGAGCATGAGACCCTTAATCTCAGGGTCGTGGGTTCGAGCCCCACGTTGGGCGCCA,Lys-CTT,0	10	0	11	12	2	12	4	16	13	1	59	0	39.1256	0	30.6758	48.6133	13.4855	77.6865	12.5164	69.7399	37.033	6.48841	258.319	0
tRF-1:30-Lys-CTT-2-M2	GCCCGGCTAGCTCAGTCGGTAGAGCATGAG	tRF-5c	-	tRF-30-PSQP4PW3FJI0	30	tRNA-Lys-CTT-2-1,GCCCGGCTAGCTCAGTCGGTAGAGCATGAGACTCTTAATCTCAGGGTCGTGGGTTCGAGCCCCACGTTGGGCGCCA,Lys-CTT,0;tRNA-Lys-CTT-3-1,GCCCGGCTAGCTCAGTCGGTAGAGCATGAGACCCTTAATCTCAGGGTCGTGGGTTCGAGCCCCACGTTGGGCGCCA,Lys-CTT,0	34	10	52	9	6	16	26	51	57	5	100	55	133.027	16.8998	145.013	36.46	40.4566	103.582	81.3565	222.296	162.376	32.442	437.828	107.481
tRF-1:31-Lys-CTT-2-M2	GCCCGGCTAGCTCAGTCGGTAGAGCATGAGA	tRF-5c	-	tRF-31-PSQP4PW3FJI0B	31	tRNA-Lys-CTT-2-1,GCCCGGCTAGCTCAGTCGGTAGAGCATGAGACTCTTAATCTCAGGGTCGTGGGTTCGAGCCCCACGTTGGGCGCCA,Lys-CTT,0;tRNA-Lys-CTT-3-1,GCCCGGCTAGCTCAGTCGGTAGAGCATGAGACCCTTAATCTCAGGGTCGTGGGTTCGAGCCCCACGTTGGGCGCCA,Lys-CTT,0	21	29	32	13	1	7	22	38	67	8	0	182	82.1638	49.0095	89.2387	52.6644	6.74277	45.3171	68.8401	165.632	190.863	51.9073	0	355.666
tRF-1:32-Lys-CTT-2-M2	GCCCGGCTAGCTCAGTCGGTAGAGCATGAGAC	tRF-5c	-	tRF-32-PSQP4PW3FJI01	32	tRNA-Lys-CTT-2-1,GCCCGGCTAGCTCAGTCGGTAGAGCATGAGACTCTTAATCTCAGGGTCGTGGGTTCGAGCCCCACGTTGGGCGCCA,Lys-CTT,0;tRNA-Lys-CTT-3-1,GCCCGGCTAGCTCAGTCGGTAGAGCATGAGACCCTTAATCTCAGGGTCGTGGGTTCGAGCCCCACGTTGGGCGCCA,Lys-CTT,0	45	136	28	34	39	31	76	78	168	20	68	820	176.065	229.838	78.0838	137.738	262.968	200.69	237.811	339.982	478.581	129.768	297.723	1602.45
tiRNA-1:34-Lys-CTT-2	GCCCGGCTAGCTCAGTCGGTAGAGCATGAGACTC	tiRNA-5	-	tRF-34-PSQP4PW3FJI0E5	34	tRNA-Lys-CTT-2-1,GCCCGGCTAGCTCAGTCGGTAGAGCATGAGACTCTTAATCTCAGGGTCGTGGGTTCGAGCCCCACGTTGGGCGCCA,Lys-CTT,0	7	3	5	5	1	13	13	18	14	8	136	268	27.3879	5.06995	13.9435	20.2555	6.74277	84.1604	40.6783	78.4574	39.8817	51.9073	595.447	523.728
tRF-1:29-Lys-CTT-1-M2	GCCCGGCTAGCTCAGTCGGTAGAGCATGG	tRF-5c	-	tRF-29-PSQP4PW3FJF4	29	tRNA-Lys-CTT-1-1,GCCCGGCTAGCTCAGTCGGTAGAGCATGGGACTCTTAATCCCAGGGTCGTGGGTTCGAGCCCCACGTTGGGCGCCA,Lys-CTT,0;tRNA-Lys-CTT-4-1,GCCCGGCTAGCTCAGTCGGTAGAGCATGGGACTCTTAATCTCAGGGTCGTGGGTTCGAGCCCCACGTTGGGCGCCA,Lys-CTT,0	4	2	12	1	0	2	7	3	1	0	1	10	15.6502	3.37997	33.4645	4.05111	0	12.9477	21.9037	13.0762	2.84869	0	4.37828	19.5421
tRF-1:32-Lys-CTT-1-M2	GCCCGGCTAGCTCAGTCGGTAGAGCATGGGAC	tRF-5c	5006c	tRF-32-PSQP4PW3FJIK1	32	tRNA-Lys-CTT-1-1,GCCCGGCTAGCTCAGTCGGTAGAGCATGGGACTCTTAATCCCAGGGTCGTGGGTTCGAGCCCCACGTTGGGCGCCA,Lys-CTT,0;tRNA-Lys-CTT-4-1,GCCCGGCTAGCTCAGTCGGTAGAGCATGGGACTCTTAATCTCAGGGTCGTGGGTTCGAGCCCCACGTTGGGCGCCA,Lys-CTT,0	0	5	0	0	1	0	4	1	8	1	0	10	0	8.44991	0	0	6.74277	0	12.5164	4.35874	22.7896	6.48841	0	19.5421
tiRNA-1:34-Lys-CTT-1-M2	GCCCGGCTAGCTCAGTCGGTAGAGCATGGGACTC	tiRNA-5	-	tRF-34-PSQP4PW3FJIKE5	34	tRNA-Lys-CTT-1-1,GCCCGGCTAGCTCAGTCGGTAGAGCATGGGACTCTTAATCCCAGGGTCGTGGGTTCGAGCCCCACGTTGGGCGCCA,Lys-CTT,0;tRNA-Lys-CTT-4-1,GCCCGGCTAGCTCAGTCGGTAGAGCATGGGACTCTTAATCTCAGGGTCGTGGGTTCGAGCCCCACGTTGGGCGCCA,Lys-CTT,0	28	5	19	9	2	15	16	13	14	14	126	22	109.552	8.44991	52.9855	36.46	13.4855	97.1081	50.0656	56.6636	39.8817	90.8377	551.664	42.9926
tRF-1:16-Phe-GAA-1-M3	GCCGAAATAGCTCAGT	tRF-5a	-	-	16	tRNA-Phe-GAA-1-1,GCCGAAATAGCTCAGTTGGGAGAGCGTTAGACTGAAGATCTAAAGGTCCCTGGTTCGATCCCGGGTTTCGGCACCA,Phe-GAA,0;tRNA-Phe-GAA-2-1,GCCGAAATAGCTCAGTTGGGAGAGCGTTAGACTGAAGATCTAAAGGTCCCTGGTTCAATCCCGGGTTTCGGCACCA,Phe-GAA,0;tRNA-Phe-GAA-4-1,GCCGAAATAGCTCAGTTGGGAGAGCGTTAGACCGAAGATCTTAAAGGTCCCTGGTTCAATCCCGGGTTTCGGCACCA,Phe-GAA,0	1	0	0	0	0	0	23	0	0	0	0	0	3.91256	0	0	0	0	0	71.9692	0	0	0	0	0
tRF-1:22-Phe-GAA-1-M3	GCCGAAATAGCTCAGTTGGGAG	tRF-5b	-	tRF-22-PUDP4PZKH	22	tRNA-Phe-GAA-1-1,GCCGAAATAGCTCAGTTGGGAGAGCGTTAGACTGAAGATCTAAAGGTCCCTGGTTCGATCCCGGGTTTCGGCACCA,Phe-GAA,0;tRNA-Phe-GAA-2-1,GCCGAAATAGCTCAGTTGGGAGAGCGTTAGACTGAAGATCTAAAGGTCCCTGGTTCAATCCCGGGTTTCGGCACCA,Phe-GAA,0;tRNA-Phe-GAA-4-1,GCCGAAATAGCTCAGTTGGGAGAGCGTTAGACCGAAGATCTTAAAGGTCCCTGGTTCAATCCCGGGTTTCGGCACCA,Phe-GAA,0	0	0	0	0	0	0	0	10	11	0	0	0	0	0	0	0	0	0	0	43.5874	31.3356	0	0	0
tRF-1:24-Phe-GAA-1-M3	GCCGAAATAGCTCAGTTGGGAGAG	tRF-5b	-	-	24	tRNA-Phe-GAA-1-1,GCCGAAATAGCTCAGTTGGGAGAGCGTTAGACTGAAGATCTAAAGGTCCCTGGTTCGATCCCGGGTTTCGGCACCA,Phe-GAA,0;tRNA-Phe-GAA-2-1,GCCGAAATAGCTCAGTTGGGAGAGCGTTAGACTGAAGATCTAAAGGTCCCTGGTTCAATCCCGGGTTTCGGCACCA,Phe-GAA,0;tRNA-Phe-GAA-4-1,GCCGAAATAGCTCAGTTGGGAGAGCGTTAGACCGAAGATCTTAAAGGTCCCTGGTTCAATCCCGGGTTTCGGCACCA,Phe-GAA,0	0	0	0	0	0	0	0	11	0	1	0	0	0	0	0	0	0	0	0	47.9462	0	6.48841	0	0
tRF-1:14-His-GTG-1	GCCGTGATCGTATA	tRF-5a	-	-	14	tRNA-His-GTG-1-1,GCCGTGATCGTATAGTGGTTAGTACTCTGCGTTGTGGCCGCAGCAACCTCGGTTCGAATCCGAGTCACGGCACCA,His-GTG,0	6	19	24	4	0	22	0	0	0	54	68	15	23.4754	32.1097	66.929	16.2044	0	142.425	0	0	0	350.374	297.723	29.3131
tRF-1:15-His-GTG-1	GCCGTGATCGTATAG	tRF-5a	-	-	15	tRNA-His-GTG-1-1,GCCGTGATCGTATAGTGGTTAGTACTCTGCGTTGTGGCCGCAGCAACCTCGGTTCGAATCCGAGTCACGGCACCA,His-GTG,0	13	8	7	17	0	18	0	6	9	0	2	31	50.8633	13.5199	19.521	68.8688	0	116.53	0	26.1525	25.6382	0	8.75657	60.5805
tRF-1:16-His-GTG-1	GCCGTGATCGTATAGT	tRF-5a	-	-	16	tRNA-His-GTG-1-1,GCCGTGATCGTATAGTGGTTAGTACTCTGCGTTGTGGCCGCAGCAACCTCGGTTCGAATCCGAGTCACGGCACCA,His-GTG,0	0	0	8	0	0	0	0	0	0	0	0	0	0	0	22.3097	0	0	0	0	0	0	0	0	0
tRF-1:22-His-GTG-1	GCCGTGATCGTATAGTGGTTAG	tRF-5b	-	tRF-22-PW5SVP9NH	22	tRNA-His-GTG-1-1,GCCGTGATCGTATAGTGGTTAGTACTCTGCGTTGTGGCCGCAGCAACCTCGGTTCGAATCCGAGTCACGGCACCA,His-GTG,0	0	29	0	0	0	0	0	16	1	0	1	0	0	49.0095	0	0	0	0	0	69.7399	2.84869	0	4.37828	0
tRF-1:24-His-GTG-1	GCCGTGATCGTATAGTGGTTAGTA	tRF-5b	-	tRF-24-PW5SVP9NFB	24	tRNA-His-GTG-1-1,GCCGTGATCGTATAGTGGTTAGTACTCTGCGTTGTGGCCGCAGCAACCTCGGTTCGAATCCGAGTCACGGCACCA,His-GTG,0	6	27	28	9	0	0	17	2	31	0	34	0	23.4754	45.6295	78.0838	36.46	0	0	53.1947	8.71748	88.3095	0	148.862	0
tRF-1:28-His-GTG-1	GCCGTGATCGTATAGTGGTTAGTACTCT	tRF-5c	-	tRF-28-PW5SVP9N1503	28	tRNA-His-GTG-1-1,GCCGTGATCGTATAGTGGTTAGTACTCTGCGTTGTGGCCGCAGCAACCTCGGTTCGAATCCGAGTCACGGCACCA,His-GTG,0	67	32	87	47	12	16	29	41	47	6	30	3	262.142	54.0794	242.618	190.402	80.9132	103.582	90.7438	178.708	133.889	38.9305	131.349	5.86263
tRF-1:29-His-GTG-1	GCCGTGATCGTATAGTGGTTAGTACTCTG	tRF-5c	-	tRF-29-PW5SVP9N15JP	29	tRNA-His-GTG-1-1,GCCGTGATCGTATAGTGGTTAGTACTCTGCGTTGTGGCCGCAGCAACCTCGGTTCGAATCCGAGTCACGGCACCA,His-GTG,0	375	65	409	168	12	98	87	402	362	34	244	70	1467.21	109.849	1140.58	680.586	80.9132	634.44	272.231	1752.21	1031.23	220.606	1068.3	136.795
tRF-1:30-His-GTG-1	GCCGTGATCGTATAGTGGTTAGTACTCTGC	tRF-5c	-	tRF-30-PW5SVP9N15WV	30	tRNA-His-GTG-1-1,GCCGTGATCGTATAGTGGTTAGTACTCTGCGTTGTGGCCGCAGCAACCTCGGTTCGAATCCGAGTCACGGCACCA,His-GTG,0	83	2321	348	124	42	99	56	106	218	44	2100	418	324.743	3922.45	970.47	502.337	283.196	640.914	175.229	462.027	621.015	285.49	9194.4	816.859
tRF-1:31-His-GTG-1	GCCGTGATCGTATAGTGGTTAGTACTCTGCG	tRF-5c	-	tRF-31-PW5SVP9N15WV0	31	tRNA-His-GTG-1-1,GCCGTGATCGTATAGTGGTTAGTACTCTGCGTTGTGGCCGCAGCAACCTCGGTTCGAATCCGAGTCACGGCACCA,His-GTG,0	723	20280	1230	340	146	201	456	562	1005	90	2461	3122	2828.78	34272.9	3430.11	1377.38	984.444	1301.25	1426.87	2449.61	2862.94	583.957	10775	6101.04
tRF-1:32-His-GTG-1	GCCGTGATCGTATAGTGGTTAGTACTCTGCGT	tRF-5c	-	tRF-32-PW5SVP9N15WVN	32	tRNA-His-GTG-1-1,GCCGTGATCGTATAGTGGTTAGTACTCTGCGTTGTGGCCGCAGCAACCTCGGTTCGAATCCGAGTCACGGCACCA,His-GTG,0	64	2724	158	93	37	12	31	34	136	5	252	485	250.404	4603.51	440.616	376.753	249.482	77.6865	97.002	148.197	387.422	32.442	1103.33	947.791
tiRNA-1:34-His-GTG-1	GCCGTGATCGTATAGTGGTTAGTACTCTGCGTTG	tiRNA-5	-	tRF-34-PW5SVP9N15WV2P	34	tRNA-His-GTG-1-1,GCCGTGATCGTATAGTGGTTAGTACTCTGCGTTGTGGCCGCAGCAACCTCGGTTCGAATCCGAGTCACGGCACCA,His-GTG,0	6	74	19	7	4	3	14	16	49	4	372	83	23.4754	125.059	52.9855	28.3578	26.9711	19.4216	43.8074	69.7399	139.586	25.9536	1628.72	162.199
tRF-53:69-chrM.Tyr-GTA	GCCTCTTTTTACCACCA	tRF-3a	-	-	17	chrM.tRNA18-TyrGTA,GGTAAAATGGCTGAGTGAAGCATTGGACTGTAAATCTAAAGACAGGGGTTAGGCCTCTTTTTACCACCA,Tyr-GTA,52	0	0	0	0	0	0	0	0	0	0	0	28	0	0	0	0	0	0	0	0	0	0	0	54.7179
tRF-1:24-Lys-TTT-1-M2	GCCTGGATAGCTCAGTTGGTAGAG	tRF-5b	-	-	24	tRNA-Lys-TTT-1-1,GCCTGGATAGCTCAGTTGGTAGAGCATCAGACTTTTAATCTGAGGGTCCAGGGTTCAAGTCCCTGTTCAGGCACCA,Lys-TTT,0;tRNA-Lys-TTT-2-1,GCCTGGATAGCTCAGTTGGTAGAGCATCAGACTTTTAATCTGAGGGTCCAGGGTTCAAGTCCCTGTTCAGGCGCCA,Lys-TTT,0	0	4	0	0	5	0	0	0	0	0	0	0	0	6.75993	0	0	33.7139	0	0	0	0	0	0	0
tRF-30:43-Asp-GTC-1-M2	GCCTGTCACGCGGG	tRF-2	-	-	14	tRNA-Asp-GTC-1-1,TCCTCGTTAGTATAGTGGTTAGTATCCCCGCCTGTCACGCGGGAGACCGGGGTTCAATTCCCCGACGGGGAGCCA,Asp-GTC,29;tRNA-Asp-GTC-2-1,TCCTCGTTAGTATAGTGGTGAGTATCCCCGCCTGTCACGCGGGAGACCGGGGTTCGATTCCCCGACGGGGAGCCA,Asp-GTC,29	0	0	0	5	0	0	0	0	0	0	0	0	0	0	0	20.2555	0	0	0	0	0	0	0	0
tRF-+1:T15-Arg-CCT-4	GCCTGTGACTTTTGT	tRF-1	-	-	15	pre_tRNA-Arg-CCT-4-1,AAATAGTTGAATATGTTGTGTGAGCGCGTCGTTTGCAGAAGCCCCAGTGGCCTAATGGATAAGGCATTGGCCTCCTAAGCCAGGGATTGTGGGTTCGAGTCCCATCTGGGGTGGCCTGTGACTTTTGTCCTTTTTTCCCCTTTCTAAACAAAG,Arg-CCT,113	4	0	0	5	0	0	0	0	0	0	0	0	15.6502	0	0	20.2555	0	0	0	0	0	0	0	0
tRF-1:14-Gly-CCC-2	GCGCCGCTGGTGTA	tRF-5a	-	-	14	tRNA-Gly-CCC-2-1,GCGCCGCTGGTGTAGTGGTATCATGCAAGATTCCCATTCTTGCGACCCGGGTTCGATTCCCGGGCGGCGCACCA,Gly-CCC,0	0	0	28	12	0	0	15	0	22	23	42	32	0	0	78.0838	48.6133	0	0	46.9365	0	62.6713	149.233	183.888	62.5347
tRF-1:15-Gly-CCC-2	GCGCCGCTGGTGTAG	tRF-5a	5007a	-	15	tRNA-Gly-CCC-2-1,GCGCCGCTGGTGTAGTGGTATCATGCAAGATTCCCATTCTTGCGACCCGGGTTCGATTCCCGGGCGGCGCACCA,Gly-CCC,0	0	0	8	14	0	0	0	0	0	0	0	0	0	0	22.3097	56.7155	0	0	0	0	0	0	0	0
tRF-1:16-Gly-CCC-2	GCGCCGCTGGTGTAGT	tRF-5a	-	tRF-16-Q1Q89PE	16	tRNA-Gly-CCC-2-1,GCGCCGCTGGTGTAGTGGTATCATGCAAGATTCCCATTCTTGCGACCCGGGTTCGATTCCCGGGCGGCGCACCA,Gly-CCC,0	0	0	15	0	0	0	0	0	0	0	1	0	0	0	41.8306	0	0	0	0	0	0	0	4.37828	0
tRF-1:22-Gly-CCC-2	GCGCCGCTGGTGTAGTGGTATC	tRF-5b	-	tRF-22-Q1Q89P9L5	22	tRNA-Gly-CCC-2-1,GCGCCGCTGGTGTAGTGGTATCATGCAAGATTCCCATTCTTGCGACCCGGGTTCGATTCCCGGGCGGCGCACCA,Gly-CCC,0	0	7	0	0	0	1	0	6	0	0	0	0	0	11.8299	0	0	0	6.47387	0	26.1525	0	0	0	0
tRF-1:29-Gly-CCC-2	GCGCCGCTGGTGTAGTGGTATCATGCAAG	tRF-5c	-	tRF-29-Q1Q89P9L84FS	29	tRNA-Gly-CCC-2-1,GCGCCGCTGGTGTAGTGGTATCATGCAAGATTCCCATTCTTGCGACCCGGGTTCGATTCCCGGGCGGCGCACCA,Gly-CCC,0	17	42	8	32	5	5	12	6	16	4	0	0	66.5136	70.9793	22.3097	129.635	33.7139	32.3694	37.5492	26.1525	45.5791	25.9536	0	0
tRF-1:30-Gly-CCC-2	GCGCCGCTGGTGTAGTGGTATCATGCAAGA	tRF-5c	5007c	tRF-30-Q1Q89P9L8422	30	tRNA-Gly-CCC-2-1,GCGCCGCTGGTGTAGTGGTATCATGCAAGATTCCCATTCTTGCGACCCGGGTTCGATTCCCGGGCGGCGCACCA,Gly-CCC,0	52	196	16	23	8	14	43	33	67	5	26	50	203.453	331.237	44.6193	93.1755	53.9422	90.6342	134.551	143.838	190.863	32.442	113.835	97.7104
tRF-1:32-Gly-CCC-2	GCGCCGCTGGTGTAGTGGTATCATGCAAGATT	tRF-5c	-	tRF-32-Q1Q89P9L8422Q	32	tRNA-Gly-CCC-2-1,GCGCCGCTGGTGTAGTGGTATCATGCAAGATTCCCATTCTTGCGACCCGGGTTCGATTCCCGGGCGGCGCACCA,Gly-CCC,0	60	174	31	42	12	16	45	32	71	18	147	370	234.754	294.057	86.4499	170.147	80.9132	103.582	140.809	139.48	202.257	116.791	643.608	723.057
tiRNA-1:33-Gly-CCC-2	GCGCCGCTGGTGTAGTGGTATCATGCAAGATTC	tiRNA-5	-	tRF-33-Q1Q89P9L842205	33	tRNA-Gly-CCC-2-1,GCGCCGCTGGTGTAGTGGTATCATGCAAGATTCCCATTCTTGCGACCCGGGTTCGATTCCCGGGCGGCGCACCA,Gly-CCC,0	5	0	4	2	1	0	3	6	2	4	202	0	19.5628	0	11.1548	8.10222	6.74277	0	9.38729	26.1525	5.69739	25.9536	884.413	0
tRF-29:42-Glu-CTC-1-M2	GCGCTCTCACCGCC	tRF-2	-	-	14	tRNA-Glu-CTC-1-1,TCCCTGGTGGTCTAGTGGTTAGGATTCGGCGCTCTCACCGCCGCGGCCCGGGTTCGATTCCCGGTCAGGGAACCA,Glu-CTC,28;tRNA-Glu-CTC-2-1,TCCCTGGTGGTCTAGTGGTTAGGATTCGGCGCTCTCACCGCCGCGGCCCGGGTTCGATTCCCGGTCAGGAAACCA,Glu-CTC,28	0	0	13	0	0	0	0	0	0	0	0	0	0	0	36.2532	0	0	0	0	0	0	0	0	0
tRF-+1:T14-Gly-TCC-2-2	GCGGGCGGACCTTT	tRF-1	-	-	14	pre_tRNA-Gly-TCC-2-2,GAGCCCCGGGCCGGCGCGGCGGGGCTGCCCGCGCCGTGCGGCGTTGGTGGTATAGTGGTGAGCATAGCTGCCTTCCAAGCAGTTGACCCGGGTTCGATTCCCGGCCAACGCAGCGGGCGGACCTTTTGCGGAGGTCCCCGTCGCGGAGCTCG,Gly-TCC,112	34	4	7	28	62	54	33	38	4	0	0	1	133.027	6.75993	19.521	113.431	418.052	349.589	103.26	165.632	11.3948	0	0	1.95421
tRF-+1:T15-Gly-TCC-2-2	GCGGGCGGACCTTTT	tRF-1	1023	-	15	pre_tRNA-Gly-TCC-2-2,GAGCCCCGGGCCGGCGCGGCGGGGCTGCCCGCGCCGTGCGGCGTTGGTGGTATAGTGGTGAGCATAGCTGCCTTCCAAGCAGTTGACCCGGGTTCGATTCCCGGCCAACGCAGCGGGCGGACCTTTTGCGGAGGTCCCCGTCGCGGAGCTCG,Gly-TCC,112	8	8	66	1	0	36	26	21	20	0	0	11	31.3005	13.5199	184.055	4.05111	0	233.059	81.3565	91.5336	56.9739	0	0	21.4963
tRF-+1:T16-Gly-TCC-2-2	GCGGGCGGACCTTTTG	tRF-1	-	-	16	pre_tRNA-Gly-TCC-2-2,GAGCCCCGGGCCGGCGCGGCGGGGCTGCCCGCGCCGTGCGGCGTTGGTGGTATAGTGGTGAGCATAGCTGCCTTCCAAGCAGTTGACCCGGGTTCGATTCCCGGCCAACGCAGCGGGCGGACCTTTTGCGGAGGTCCCCGTCGCGGAGCTCG,Gly-TCC,112	0	0	2	0	35	0	0	0	0	0	0	0	0	0	5.57742	0	235.997	0	0	0	0	0	0	0
tRF-1:16-Gly-TCC-1-M4	GCGTTGGTGGTATAGT	tRF-5a	-	tRF-16-QNR8VPE	16	tRNA-Gly-TCC-1-1,GCGTTGGTGGTATAGTGGTTAGCATAGCTGCCTTCCAAGCAGTTGACCCGGGTTCGATTCCCGGCCAACGCACCA,Gly-TCC,0;tRNA-Gly-TCC-2-1,GCGTTGGTGGTATAGTGGTGAGCATAGCTGCCTTCCAAGCAGTTGACCCGGGTTCGATTCCCGGCCAACGCACCA,Gly-TCC,0;tRNA-Gly-TCC-3-1,GCGTTGGTGGTATAGTGGTAAGCATAGCTGCCTTCCAAGCAGTTGACCCGGGTTCGATTCCCGGCCAACGCACCA,Gly-TCC,0;tRNA-Gly-TCC-4-1,GCGTTGGTGGTATAGTGGTGAGCATAGTTGCCTTCCAAGCAGTTGACCCGGGCTCGATTCCCGCCCAACGCAC…	2	8	9	12	0	0	0	0	0	0	0	30	7.82512	13.5199	25.0984	48.6133	0	0	0	0	0	0	0	58.6263
tRF-1:29-Gly-TCC-3	GCGTTGGTGGTATAGTGGTAAGCATAGCT	tRF-5c	-	-	29	tRNA-Gly-TCC-3-1,GCGTTGGTGGTATAGTGGTAAGCATAGCTGCCTTCCAAGCAGTTGACCCGGGTTCGATTCCCGGCCAACGCACCA,Gly-TCC,0	3	1	0	0	0	0	1	1	1	0	20	0	11.7377	1.68998	0	0	0	0	3.1291	4.35874	2.84869	0	87.5657	0
tRF-1:30-Gly-TCC-3	GCGTTGGTGGTATAGTGGTAAGCATAGCTG	tRF-5c	-	tRF-30-QNR8VP9LFQFY	30	tRNA-Gly-TCC-3-1,GCGTTGGTGGTATAGTGGTAAGCATAGCTGCCTTCCAAGCAGTTGACCCGGGTTCGATTCCCGGCCAACGCACCA,Gly-TCC,0	7	0	1	1	0	0	1	4	3	0	0	0	27.3879	0	2.78871	4.05111	0	0	3.1291	17.435	8.54608	0	0	0
tRF-1:23-Gly-TCC-2-M2	GCGTTGGTGGTATAGTGGTGAGC	tRF-5b	5008b	tRF-23-QNR8VP949	23	tRNA-Gly-TCC-2-1,GCGTTGGTGGTATAGTGGTGAGCATAGCTGCCTTCCAAGCAGTTGACCCGGGTTCGATTCCCGGCCAACGCACCA,Gly-TCC,0;tRNA-Gly-TCC-4-1,GCGTTGGTGGTATAGTGGTGAGCATAGTTGCCTTCCAAGCAGTTGACCCGGGCTCGATTCCCGCCCAACGCACCA,Gly-TCC,0	0	0	0	15	0	9	18	0	0	1	0	0	0	0	0	60.7666	0	58.2649	56.3237	0	0	6.48841	0	0
tRF-1:28-Gly-TCC-2	GCGTTGGTGGTATAGTGGTGAGCATAGC	tRF-5c	-	tRF-28-QNR8VP94FQ9	28	tRNA-Gly-TCC-2-1,GCGTTGGTGGTATAGTGGTGAGCATAGCTGCCTTCCAAGCAGTTGACCCGGGTTCGATTCCCGGCCAACGCACCA,Gly-TCC,0	5	3	2	3	1	0	12	12	4	1	0	20	19.5628	5.06995	5.57742	12.1533	6.74277	0	37.5492	52.3049	11.3948	6.48841	0	39.0842
tRF-1:29-Gly-TCC-2	GCGTTGGTGGTATAGTGGTGAGCATAGCT	tRF-5c	-	tRF-29-QNR8VP94FQEW	29	tRNA-Gly-TCC-2-1,GCGTTGGTGGTATAGTGGTGAGCATAGCTGCCTTCCAAGCAGTTGACCCGGGTTCGATTCCCGGCCAACGCACCA,Gly-TCC,0	38	6	64	26	5	15	15	42	34	0	0	23	148.677	10.1399	178.477	105.329	33.7139	97.1081	46.9365	183.067	96.8556	0	0	44.9468
tRF-1:30-Gly-TCC-2	GCGTTGGTGGTATAGTGGTGAGCATAGCTG	tRF-5c	5008c	tRF-30-QNR8VP94FQFY	30	tRNA-Gly-TCC-2-1,GCGTTGGTGGTATAGTGGTGAGCATAGCTGCCTTCCAAGCAGTTGACCCGGGTTCGATTCCCGGCCAACGCACCA,Gly-TCC,0	26	2	18	9	0	14	7	28	23	0	0	1	101.727	3.37997	50.1967	36.46	0	90.6342	21.9037	122.045	65.52	0	0	1.95421
tRF-1:32-Gly-TCC-2	GCGTTGGTGGTATAGTGGTGAGCATAGCTGCC	tRF-5c	-	tRF-32-QNR8VP94FQFYJ	32	tRNA-Gly-TCC-2-1,GCGTTGGTGGTATAGTGGTGAGCATAGCTGCCTTCCAAGCAGTTGACCCGGGTTCGATTCCCGGCCAACGCACCA,Gly-TCC,0	4	0	1	4	0	1	1	6	5	2	72	30	15.6502	0	2.78871	16.2044	0	6.47387	3.1291	26.1525	14.2435	12.9768	315.236	58.6263
tRF-1:23-Gly-TCC-1	GCGTTGGTGGTATAGTGGTTAGC	tRF-5b	-	tRF-23-QNR8VP9N9	23	tRNA-Gly-TCC-1-1,GCGTTGGTGGTATAGTGGTTAGCATAGCTGCCTTCCAAGCAGTTGACCCGGGTTCGATTCCCGGCCAACGCACCA,Gly-TCC,0	0	0	9	0	0	0	0	0	0	0	0	0	0	0	25.0984	0	0	0	0	0	0	0	0	0
tRF-1:30-Gly-TCC-1	GCGTTGGTGGTATAGTGGTTAGCATAGCTG	tRF-5c	-	tRF-30-QNR8VP9NFQFY	30	tRNA-Gly-TCC-1-1,GCGTTGGTGGTATAGTGGTTAGCATAGCTGCCTTCCAAGCAGTTGACCCGGGTTCGATTCCCGGCCAACGCACCA,Gly-TCC,0	1	1	5	0	0	5	6	4	1	0	0	10	3.91256	1.68998	13.9435	0	0	32.3694	18.7746	17.435	2.84869	0	0	19.5421
tRF-1:32-Gly-TCC-1	GCGTTGGTGGTATAGTGGTTAGCATAGCTGCC	tRF-5c	-	tRF-32-QNR8VP9NFQFYJ	32	tRNA-Gly-TCC-1-1,GCGTTGGTGGTATAGTGGTTAGCATAGCTGCCTTCCAAGCAGTTGACCCGGGTTCGATTCCCGGCCAACGCACCA,Gly-TCC,0	5	26	8	1	3	1	16	14	5	0	0	19	19.5628	43.9396	22.3097	4.05111	20.2283	6.47387	50.0656	61.0224	14.2435	0	0	37.13
tRF-+1:T25-Ser-GCT-4-3	GCTAAGGAAGTCCTGTGCTCAGTTT	tRF-1	-	-	25	pre_tRNA-Ser-GCT-4-3,GAGATGCGGAGGGCAGTCTGAACAGCGAGGGCTGTCTGCAGACGAGGTGGCCGAGTGGTTAAGGCGATGGACTGCTAATCCATTGTGCTCTGCACGCGTGGGTTCGAATCCCATCCTCGTCGGCTAAGGAAGTCCTGTGCTCAGTTTTGTAGCATCAAAACT,Ser-GCT,122	0	0	31	2	0	13	1	0	0	0	0	0	0	0	86.4499	8.10222	0	84.1604	3.1291	0	0	0	0	0
tRF-1:14-Val-CAC-2	GCTTCTGTAGTGTA	tRF-5a	-	-	14	tRNA-Val-CAC-2-1,GCTTCTGTAGTGTAGTGGTTATCACGTTCGCCTCACACGCGAAAGGTCCCCGGTTCGAAACCGGGCAGAAGCACCA,Val-CAC,0	6	4	10	0	0	0	20	20	2	0	1	39	23.4754	6.75993	27.8871	0	0	0	62.5819	87.1748	5.69739	0	4.37828	76.2142
tRF-1:15-Val-CAC-2	GCTTCTGTAGTGTAG	tRF-5a	5009a	-	15	tRNA-Val-CAC-2-1,GCTTCTGTAGTGTAGTGGTTATCACGTTCGCCTCACACGCGAAAGGTCCCCGGTTCGAAACCGGGCAGAAGCACCA,Val-CAC,0	6	5	15	0	32	34	36	22	30	2	2	2	23.4754	8.44991	41.8306	0	215.769	220.112	112.647	95.8923	85.4608	12.9768	8.75657	3.90842
tRF-1:23-Val-CAC-2	GCTTCTGTAGTGTAGTGGTTATC	tRF-5b	5009b	tRF-23-Q99P9P9NDD	23	tRNA-Val-CAC-2-1,GCTTCTGTAGTGTAGTGGTTATCACGTTCGCCTCACACGCGAAAGGTCCCCGGTTCGAAACCGGGCAGAAGCACCA,Val-CAC,0	104	73	144	74	24	60	31	68	158	86	24	33	406.906	123.369	401.574	299.782	161.826	388.432	97.002	296.394	450.094	558.003	105.079	64.4889
tRF-1:24-Val-CAC-2	GCTTCTGTAGTGTAGTGGTTATCA	tRF-5b	-	tRF-24-Q99P9P9NF2	24	tRNA-Val-CAC-2-1,GCTTCTGTAGTGTAGTGGTTATCACGTTCGCCTCACACGCGAAAGGTCCCCGGTTCGAAACCGGGCAGAAGCACCA,Val-CAC,0	69	23	61	27	5	8	0	136	126	0	0	0	269.967	38.8696	170.111	109.38	33.7139	51.791	0	592.789	358.935	0	0	0
tRF-1:28-Val-CAC-2	GCTTCTGTAGTGTAGTGGTTATCACGTT	tRF-5c	-	tRF-28-Q99P9P9NH50E	28	tRNA-Val-CAC-2-1,GCTTCTGTAGTGTAGTGGTTATCACGTTCGCCTCACACGCGAAAGGTCCCCGGTTCGAAACCGGGCAGAAGCACCA,Val-CAC,0	3	0	8	0	1	0	7	3	9	0	2	0	11.7377	0	22.3097	0	6.74277	0	21.9037	13.0762	25.6382	0	8.75657	0
tRF-1:29-Val-CAC-2	GCTTCTGTAGTGTAGTGGTTATCACGTTC	tRF-5c	-	tRF-29-Q99P9P9NH525	29	tRNA-Val-CAC-2-1,GCTTCTGTAGTGTAGTGGTTATCACGTTCGCCTCACACGCGAAAGGTCCCCGGTTCGAAACCGGGCAGAAGCACCA,Val-CAC,0	456	23	364	79	16	74	140	303	384	13	118	52	1784.13	38.8696	1015.09	320.038	107.884	479.067	438.074	1320.7	1093.9	84.3493	516.637	101.619
tRF-1:31-Val-CAC-2	GCTTCTGTAGTGTAGTGGTTATCACGTTCGC	tRF-5c	5009c	tRF-31-Q99P9P9NH57SD	31	tRNA-Val-CAC-2-1,GCTTCTGTAGTGTAGTGGTTATCACGTTCGCCTCACACGCGAAAGGTCCCCGGTTCGAAACCGGGCAGAAGCACCA,Val-CAC,0	6	15	5	8	4	3	1	0	4	0	0	22	23.4754	25.3497	13.9435	32.4089	26.9711	19.4216	3.1291	0	11.3948	0	0	42.9926
tRF-1:32-Val-CAC-2	GCTTCTGTAGTGTAGTGGTTATCACGTTCGCC	tRF-5c	-	tRF-32-Q99P9P9NH57SJ	32	tRNA-Val-CAC-2-1,GCTTCTGTAGTGTAGTGGTTATCACGTTCGCCTCACACGCGAAAGGTCCCCGGTTCGAAACCGGGCAGAAGCACCA,Val-CAC,0	45	130	48	77	3	2	20	43	72	6	4	219	176.065	219.698	133.858	311.935	20.2283	12.9477	62.5819	187.426	205.106	38.9305	17.5131	427.972
tiRNA-1:34-Val-CAC-2	GCTTCTGTAGTGTAGTGGTTATCACGTTCGCCTC	tiRNA-5	-	tRF-34-Q99P9P9NH57S15	34	tRNA-Val-CAC-2-1,GCTTCTGTAGTGTAGTGGTTATCACGTTCGCCTCACACGCGAAAGGTCCCCGGTTCGAAACCGGGCAGAAGCACCA,Val-CAC,0	11	3	7	3	0	3	0	7	3	0	2	2	43.0382	5.06995	19.521	12.1533	0	19.4216	0	30.5112	8.54608	0	8.75657	3.90842
tRF-+1:T15-Ser-AGA-2-5	GGAATGTCAGCTTTT	tRF-1	1030	-	15	pre_tRNA-Ser-AGA-2-5,GAGTCTACATGCACTCTCACCGCAAAAATTCACACAGCCAGTAGTCGTGGCCGAGTGGTTAAGGCGATGGACTAGAAATCCATTGGGGTCTCCCCGCGCAGGTTCGAATCCTGCCGACTACGGGAATGTCAGCTTTTTGCCGTCAACACTTACTTTTTGTGT,Ser-AGA,122	0	0	0	0	0	0	33	0	0	145	0	0	0	0	0	0	0	0	103.26	0	0	940.819	0	0
tRF-+1:T15-Lys-TTT-3-3	GGAGTGGTGGCTTTT	tRF-1	-	-	15	pre_tRNA-Lys-TTT-3-3,TTACTCACTAGAATGTGCAGGAAGAAGGCTTTTGCAGGGAGCCCGGATAGCTCAGTCGGTAGAGCATCAGACTTTTAATCTGAGGGTCCAGGGTTCAAGTCCCTGTTCGGGCGGGAGTGGTGGCTTTTAGTACCTGATTCTGGTATCATGTTT,Lys-TTT,113	6	0	1	0	51	0	0	0	0	0	0	0	23.4754	0	2.78871	0	343.881	0	0	0	0	0	0	0
tRF-1:29-Gln-TTG-3	GGCCCCATGGTGTAATGGTTAGCACTCTG	tRF-5c	-	tRF-29-6RJ89O9NF5JP	29	tRNA-Gln-TTG-3-1,GGCCCCATGGTGTAATGGTTAGCACTCTGGACTTTGAATCCAGCGATCCGAGTTCAAATCTCGGTGGGACCTCCA,Gln-TTG,0	12	1	16	5	0	0	4	14	18	0	0	2	46.9507	1.68998	44.6193	20.2555	0	0	12.5164	61.0224	51.2765	0	0	3.90842
tRF-1:15-Thr-TGT-5	GGCCCTATAGCTCAG	tRF-5a	-	-	15	tRNA-Thr-TGT-5-1,GGCCCTATAGCTCAGGGGTTAGAGCACTGGTCTTGTAAACCAGGGGTCGCGAGTTCAAATCTCGCTGGGGCCTCCA,Thr-TGT,0	0	0	0	9	0	6	0	16	0	0	0	0	0	0	0	36.46	0	38.8432	0	69.7399	0	0	0	0
tRF-1:29-Thr-TGT-5	GGCCCTATAGCTCAGGGGTTAGAGCACTG	tRF-5c	-	-	29	tRNA-Thr-TGT-5-1,GGCCCTATAGCTCAGGGGTTAGAGCACTGGTCTTGTAAACCAGGGGTCGCGAGTTCAAATCTCGCTGGGGCCTCCA,Thr-TGT,0	0	0	0	0	0	0	0	0	0	0	50	0	0	0	0	0	0	0	0	0	0	0	218.914	0
tRF-1:14-Thr-CGT-5	GGCCCTGTAGCTCA	tRF-5a	-	-	14	tRNA-Thr-CGT-5-1,GGCCCTGTAGCTCAGCGGTTGGAGCGCTGGTCTCGTAAACCTAGGGGTCGTGAGTTCAAATCTCACCAGGGCCTCCA,Thr-CGT,0	13	0	0	5	0	0	0	0	0	0	0	0	50.8633	0	0	20.2555	0	0	0	0	0	0	0	0
tRF-1:15-Thr-CGT-5	GGCCCTGTAGCTCAG	tRF-5a	-	-	15	tRNA-Thr-CGT-5-1,GGCCCTGTAGCTCAGCGGTTGGAGCGCTGGTCTCGTAAACCTAGGGGTCGTGAGTTCAAATCTCACCAGGGCCTCCA,Thr-CGT,0	210	28	331	89	89	737	447	457	511	249	99	360	821.638	47.3195	923.062	360.549	600.107	4771.25	1398.71	1991.95	1455.68	1615.61	433.45	703.515
tRF-1:16-Thr-CGT-5	GGCCCTGTAGCTCAGC	tRF-5a	-	-	16	tRNA-Thr-CGT-5-1,GGCCCTGTAGCTCAGCGGTTGGAGCGCTGGTCTCGTAAACCTAGGGGTCGTGAGTTCAAATCTCACCAGGGCCTCCA,Thr-CGT,0	0	3	21	2	0	6	0	1	0	0	19	1	0	5.06995	58.5629	8.10222	0	38.8432	0	4.35874	0	0	83.1874	1.95421
tRF-1:15-Ile-AAT-1-M8	GGCCGGTTAGCTCAG	tRF-5a	5010a	-	15	tRNA-Ile-AAT-1-1,GGCCGGTTAGCTCAGTTGGTTAGAGCGTGGCGCTAATAACGCCAAGGTCGCGGGTTCGATCCCCGTACGGGCCACCA,Ile-AAT,0;tRNA-Ile-AAT-2-1,GGCCGGTTAGCTCAGTTGGTTAGAGCGTGGTGCTAATAACGCCAAGGTCGCGGGTTCGATCCCCGTACTGGCCACCA,Ile-AAT,0;tRNA-Ile-AAT-4-1,GGCCGGTTAGCTCAGTTGGTTAGAGCGTGGTGCTAATAACGCCAAGGTCGCGGGTTCGAACCCCGTACGGGCCACCA,Ile-AAT,0;tRNA-Ile-AAT-5-1,GGCCGGTTAGCTCAGTTGGTTAGAGCGTGGTGCTAATAACGCCAAGGTCGCGGGTTCGATCCCCGTA…	5	7	21	0	1	0	16	3	2	2	0	19	19.5628	11.8299	58.5629	0	6.74277	0	50.0656	13.0762	5.69739	12.9768	0	37.13
tRF-1:15-Thr-CGT-2-M2	GGCGCGGTGGCCAAG	tRF-5a	-	-	15	tRNA-Thr-CGT-2-1,GGCGCGGTGGCCAAGTGGTAAGGCGTCGGTCTCGTAAACCGAAGATCACGGGTTCGAACCCCGTCCGTGCCTCCA,Thr-CGT,0;tRNA-Thr-CGT-4-1,GGCGCGGTGGCCAAGTGGTAAGGCGTCGGTCTCGTAAACCGAAGATCGCGGGTTCGAACCCCGTCCGTGCCTCCA,Thr-CGT,0	0	0	0	0	1	0	35	0	0	0	0	0	0	0	0	0	6.74277	0	109.518	0	0	0	0	0
tRF-1:29-Thr-TGT-4-M2	GGCTCCATAGCTCAGGGGTTAGAGCACTG	tRF-5c	-	-	29	tRNA-Thr-TGT-4-1,GGCTCCATAGCTCAGGGGTTAGAGCACTGGTCTTGTAAACCAGGGGTCGCGAGTTCAAATCTCGCTGGGGCCTCCA,Thr-TGT,0;tRNA-Thr-TGT-6-1,GGCTCCATAGCTCAGGGGTTAGAGCACTGGTCTTGTAAACCAGGGTCGCGAGTTCAAATCTCGCTGGGGCCTCCA,Thr-TGT,0	2	2	0	0	0	0	0	10	1	0	0	0	7.82512	3.37997	0	0	0	0	0	43.5874	2.84869	0	0	0
tRF-1:30-Thr-TGT-4-M2	GGCTCCATAGCTCAGGGGTTAGAGCACTGG	tRF-5c	-	-	30	tRNA-Thr-TGT-4-1,GGCTCCATAGCTCAGGGGTTAGAGCACTGGTCTTGTAAACCAGGGGTCGCGAGTTCAAATCTCGCTGGGGCCTCCA,Thr-TGT,0;tRNA-Thr-TGT-6-1,GGCTCCATAGCTCAGGGGTTAGAGCACTGGTCTTGTAAACCAGGGTCGCGAGTTCAAATCTCGCTGGGGCCTCCA,Thr-TGT,0	1	6	4	4	0	2	2	8	5	0	0	30	3.91256	10.1399	11.1548	16.2044	0	12.9477	6.25819	34.8699	14.2435	0	0	58.6263
tRF-1:31-Thr-TGT-4-M2	GGCTCCATAGCTCAGGGGTTAGAGCACTGGT	tRF-5c	-	-	31	tRNA-Thr-TGT-4-1,GGCTCCATAGCTCAGGGGTTAGAGCACTGGTCTTGTAAACCAGGGGTCGCGAGTTCAAATCTCGCTGGGGCCTCCA,Thr-TGT,0;tRNA-Thr-TGT-6-1,GGCTCCATAGCTCAGGGGTTAGAGCACTGGTCTTGTAAACCAGGGTCGCGAGTTCAAATCTCGCTGGGGCCTCCA,Thr-TGT,0	0	0	0	0	0	0	0	0	0	0	60	0	0	0	0	0	0	0	0	0	0	0	262.697	0
tRF-1:29-Arg-TCT-1	GGCTCCGTGGCGCAATGGATAGCGCATTG	tRF-5c	-	-	29	tRNA-Arg-TCT-1-1,GGCTCCGTGGCGCAATGGATAGCGCATTGGACTTCTAATTCAAAGGTTCCGGGTTCGAGTCCCGGCGGAGTCGCCA,Arg-TCT,0	2	1	2	2	0	0	2	2	8	0	0	0	7.82512	1.68998	5.57742	8.10222	0	0	6.25819	8.71748	22.7896	0	0	0
tRF-1:30-Arg-TCT-1	GGCTCCGTGGCGCAATGGATAGCGCATTGG	tRF-5c	-	-	30	tRNA-Arg-TCT-1-1,GGCTCCGTGGCGCAATGGATAGCGCATTGGACTTCTAATTCAAAGGTTCCGGGTTCGAGTCCCGGCGGAGTCGCCA,Arg-TCT,0	0	4	0	0	0	0	4	0	2	5	0	4	0	6.75993	0	0	0	0	12.5164	0	5.69739	32.442	0	7.81684
tRF-1:14-Pro-AGG-1-M7	GGCTCGTTGGTCTA	tRF-5a	-	-	14	tRNA-Pro-AGG-1-1,GGCTCGTTGGTCTAGGGGTATGATTCTCGCTTAGGATGCGAGAGGTCCCGGGTTCAAATCCCGGACGAGCCCCCA,Pro-AGG,0;tRNA-Pro-AGG-2-1,GGCTCGTTGGTCTAGGGGTATGATTCTCGCTTAGGGTGCGAGAGGTCCCGGGTTCAAATCCCGGACGAGCCCCCA,Pro-AGG,0;tRNA-Pro-CGG-1-1,GGCTCGTTGGTCTAGGGGTATGATTCTCGCTTCGGGTGCGAGAGGTCCCGGGTTCAAATCCCGGACGAGCCCCCA,Pro-CGG,0;tRNA-Pro-CGG-2-1,GGCTCGTTGGTCTAGGGGTATGATTCTCGCTTCGGGTGTGAGAGGTCCCGGGTTCAAATCCCGGACGAGCCCC…	1	0	37	3	14	1	1	12	19	5	57	0	3.91256	0	103.182	12.1533	94.3988	6.47387	3.1291	52.3049	54.1252	32.442	249.562	0
tRF-1:15-Pro-AGG-1-M7	GGCTCGTTGGTCTAG	tRF-5a	5011a	-	15	tRNA-Pro-AGG-1-1,GGCTCGTTGGTCTAGGGGTATGATTCTCGCTTAGGATGCGAGAGGTCCCGGGTTCAAATCCCGGACGAGCCCCCA,Pro-AGG,0;tRNA-Pro-AGG-2-1,GGCTCGTTGGTCTAGGGGTATGATTCTCGCTTAGGGTGCGAGAGGTCCCGGGTTCAAATCCCGGACGAGCCCCCA,Pro-AGG,0;tRNA-Pro-CGG-1-1,GGCTCGTTGGTCTAGGGGTATGATTCTCGCTTCGGGTGCGAGAGGTCCCGGGTTCAAATCCCGGACGAGCCCCCA,Pro-CGG,0;tRNA-Pro-CGG-2-1,GGCTCGTTGGTCTAGGGGTATGATTCTCGCTTCGGGTGTGAGAGGTCCCGGGTTCAAATCCCGGACGAGCCCC…	5	3	43	3	64	42	44	31	13	248	12	21	19.5628	5.06995	119.914	12.1533	431.537	271.903	137.68	135.121	37.033	1609.13	52.5394	41.0384
tRF-1:16-Pro-AGG-1-M6	GGCTCGTTGGTCTAGG	tRF-5a	-	tRF-16-6978WP0	16	tRNA-Pro-AGG-1-1,GGCTCGTTGGTCTAGGGGTATGATTCTCGCTTAGGATGCGAGAGGTCCCGGGTTCAAATCCCGGACGAGCCCCCA,Pro-AGG,0;tRNA-Pro-AGG-2-1,GGCTCGTTGGTCTAGGGGTATGATTCTCGCTTAGGGTGCGAGAGGTCCCGGGTTCAAATCCCGGACGAGCCCCCA,Pro-AGG,0;tRNA-Pro-CGG-1-1,GGCTCGTTGGTCTAGGGGTATGATTCTCGCTTCGGGTGCGAGAGGTCCCGGGTTCAAATCCCGGACGAGCCCCCA,Pro-CGG,0;tRNA-Pro-CGG-2-1,GGCTCGTTGGTCTAGGGGTATGATTCTCGCTTCGGGTGTGAGAGGTCCCGGGTTCAAATCCCGGACGAGCCCC…	18	5	48	14	117	66	8	72	50	316	132	74	70.4261	8.44991	133.858	56.7155	788.904	427.276	25.0328	313.829	142.435	2050.34	577.933	144.611
tRF-1:22-Pro-AGG-1-M6	GGCTCGTTGGTCTAGGGGTATG	tRF-5b	-	tRF-22-6978WPRLP	22	tRNA-Pro-AGG-1-1,GGCTCGTTGGTCTAGGGGTATGATTCTCGCTTAGGATGCGAGAGGTCCCGGGTTCAAATCCCGGACGAGCCCCCA,Pro-AGG,0;tRNA-Pro-AGG-2-1,GGCTCGTTGGTCTAGGGGTATGATTCTCGCTTAGGGTGCGAGAGGTCCCGGGTTCAAATCCCGGACGAGCCCCCA,Pro-AGG,0;tRNA-Pro-CGG-1-1,GGCTCGTTGGTCTAGGGGTATGATTCTCGCTTCGGGTGCGAGAGGTCCCGGGTTCAAATCCCGGACGAGCCCCCA,Pro-CGG,0;tRNA-Pro-CGG-2-1,GGCTCGTTGGTCTAGGGGTATGATTCTCGCTTCGGGTGTGAGAGGTCCCGGGTTCAAATCCCGGACGAGCCCC…	18	5	57	6	0	33	15	69	31	2	59	8	70.4261	8.44991	158.956	24.3067	0	213.638	46.9365	300.753	88.3095	12.9768	258.319	15.6337
tRF-1:23-Pro-AGG-1-M6	GGCTCGTTGGTCTAGGGGTATGA	tRF-5b	5012b	tRF-23-6978WPRL0L	23	tRNA-Pro-AGG-1-1,GGCTCGTTGGTCTAGGGGTATGATTCTCGCTTAGGATGCGAGAGGTCCCGGGTTCAAATCCCGGACGAGCCCCCA,Pro-AGG,0;tRNA-Pro-AGG-2-1,GGCTCGTTGGTCTAGGGGTATGATTCTCGCTTAGGGTGCGAGAGGTCCCGGGTTCAAATCCCGGACGAGCCCCCA,Pro-AGG,0;tRNA-Pro-CGG-1-1,GGCTCGTTGGTCTAGGGGTATGATTCTCGCTTCGGGTGCGAGAGGTCCCGGGTTCAAATCCCGGACGAGCCCCCA,Pro-CGG,0;tRNA-Pro-CGG-2-1,GGCTCGTTGGTCTAGGGGTATGATTCTCGCTTCGGGTGTGAGAGGTCCCGGGTTCAAATCCCGGACGAGCCCC…	0	0	8	1	18	0	0	1	34	1	0	0	0	0	22.3097	4.05111	121.37	0	0	4.35874	96.8556	6.48841	0	0
tRF-1:24-Pro-AGG-1-M6	GGCTCGTTGGTCTAGGGGTATGAT	tRF-5b	-	tRF-24-6978WPRLJ7	24	tRNA-Pro-AGG-1-1,GGCTCGTTGGTCTAGGGGTATGATTCTCGCTTAGGATGCGAGAGGTCCCGGGTTCAAATCCCGGACGAGCCCCCA,Pro-AGG,0;tRNA-Pro-AGG-2-1,GGCTCGTTGGTCTAGGGGTATGATTCTCGCTTAGGGTGCGAGAGGTCCCGGGTTCAAATCCCGGACGAGCCCCCA,Pro-AGG,0;tRNA-Pro-CGG-1-1,GGCTCGTTGGTCTAGGGGTATGATTCTCGCTTCGGGTGCGAGAGGTCCCGGGTTCAAATCCCGGACGAGCCCCCA,Pro-CGG,0;tRNA-Pro-CGG-2-1,GGCTCGTTGGTCTAGGGGTATGATTCTCGCTTCGGGTGTGAGAGGTCCCGGGTTCAAATCCCGGACGAGCCCC…	39	10	40	5	37	3	18	60	29	4	8	27	152.59	16.8998	111.548	20.2555	249.482	19.4216	56.3237	261.525	82.6121	25.9536	35.0263	52.7636
tRF-1:28-Pro-AGG-1-M6	GGCTCGTTGGTCTAGGGGTATGATTCTC	tRF-5c	-	tRF-28-6978WPRLXND5	28	tRNA-Pro-AGG-1-1,GGCTCGTTGGTCTAGGGGTATGATTCTCGCTTAGGATGCGAGAGGTCCCGGGTTCAAATCCCGGACGAGCCCCCA,Pro-AGG,0;tRNA-Pro-AGG-2-1,GGCTCGTTGGTCTAGGGGTATGATTCTCGCTTAGGGTGCGAGAGGTCCCGGGTTCAAATCCCGGACGAGCCCCCA,Pro-AGG,0;tRNA-Pro-CGG-1-1,GGCTCGTTGGTCTAGGGGTATGATTCTCGCTTCGGGTGCGAGAGGTCCCGGGTTCAAATCCCGGACGAGCCCCCA,Pro-CGG,0;tRNA-Pro-CGG-2-1,GGCTCGTTGGTCTAGGGGTATGATTCTCGCTTCGGGTGTGAGAGGTCCCGGGTTCAAATCCCGGACGAGCCCC…	5727	48	5284	1408	350	2100	2634	5059	5668	366	302	1761	22407.2	81.1192	14735.5	5703.96	2359.97	13595.1	8242.04	22050.9	16146.4	2374.76	1322.24	3441.36
tRF-1:29-Pro-AGG-1-M6	GGCTCGTTGGTCTAGGGGTATGATTCTCG	tRF-5c	-	tRF-29-6978WPRLXNHK	29	tRNA-Pro-AGG-1-1,GGCTCGTTGGTCTAGGGGTATGATTCTCGCTTAGGATGCGAGAGGTCCCGGGTTCAAATCCCGGACGAGCCCCCA,Pro-AGG,0;tRNA-Pro-AGG-2-1,GGCTCGTTGGTCTAGGGGTATGATTCTCGCTTAGGGTGCGAGAGGTCCCGGGTTCAAATCCCGGACGAGCCCCCA,Pro-AGG,0;tRNA-Pro-CGG-1-1,GGCTCGTTGGTCTAGGGGTATGATTCTCGCTTCGGGTGCGAGAGGTCCCGGGTTCAAATCCCGGACGAGCCCCCA,Pro-CGG,0;tRNA-Pro-CGG-2-1,GGCTCGTTGGTCTAGGGGTATGATTCTCGCTTCGGGTGTGAGAGGTCCCGGGTTCAAATCCCGGACGAGCCCC…	2774	66	2288	579	200	1237	1552	3400	3200	306	450	1940	10853.4	111.539	6380.56	2345.59	1348.55	8008.18	4856.36	14819.7	9115.82	1985.45	1970.23	3791.17
tRF-1:30-Pro-AGG-1-M5	GGCTCGTTGGTCTAGGGGTATGATTCTCGC	tRF-5c	5013c	tRF-30-6978WPRLXN4V	30	tRNA-Pro-AGG-1-1,GGCTCGTTGGTCTAGGGGTATGATTCTCGCTTAGGATGCGAGAGGTCCCGGGTTCAAATCCCGGACGAGCCCCCA,Pro-AGG,0;tRNA-Pro-AGG-2-1,GGCTCGTTGGTCTAGGGGTATGATTCTCGCTTAGGGTGCGAGAGGTCCCGGGTTCAAATCCCGGACGAGCCCCCA,Pro-AGG,0;tRNA-Pro-CGG-1-1,GGCTCGTTGGTCTAGGGGTATGATTCTCGCTTCGGGTGCGAGAGGTCCCGGGTTCAAATCCCGGACGAGCCCCCA,Pro-CGG,0;tRNA-Pro-CGG-2-1,GGCTCGTTGGTCTAGGGGTATGATTCTCGCTTCGGGTGTGAGAGGTCCCGGGTTCAAATCCCGGACGAGCCCC…	57	29	83	131	18	34	28	53	178	8	10	196	223.016	49.0095	231.463	530.695	121.37	220.112	87.6147	231.013	507.068	51.9073	43.7828	383.025
tRF-1:31-Pro-AGG-1-M5	GGCTCGTTGGTCTAGGGGTATGATTCTCGCT	tRF-5c	-	tRF-31-6978WPRLXN4VE	31	tRNA-Pro-AGG-1-1,GGCTCGTTGGTCTAGGGGTATGATTCTCGCTTAGGATGCGAGAGGTCCCGGGTTCAAATCCCGGACGAGCCCCCA,Pro-AGG,0;tRNA-Pro-AGG-2-1,GGCTCGTTGGTCTAGGGGTATGATTCTCGCTTAGGGTGCGAGAGGTCCCGGGTTCAAATCCCGGACGAGCCCCCA,Pro-AGG,0;tRNA-Pro-CGG-1-1,GGCTCGTTGGTCTAGGGGTATGATTCTCGCTTCGGGTGCGAGAGGTCCCGGGTTCAAATCCCGGACGAGCCCCCA,Pro-CGG,0;tRNA-Pro-CGG-2-1,GGCTCGTTGGTCTAGGGGTATGATTCTCGCTTCGGGTGTGAGAGGTCCCGGGTTCAAATCCCGGACGAGCCCC…	272	485	354	873	176	198	309	278	632	25	169	850	1064.22	819.642	987.203	3536.62	1186.73	1281.83	966.891	1211.73	1800.37	162.21	739.93	1661.08
tRF-1:32-Pro-AGG-1-M5	GGCTCGTTGGTCTAGGGGTATGATTCTCGCTT	tRF-5c	-	tRF-32-6978WPRLXN4VQ	32	tRNA-Pro-AGG-1-1,GGCTCGTTGGTCTAGGGGTATGATTCTCGCTTAGGATGCGAGAGGTCCCGGGTTCAAATCCCGGACGAGCCCCCA,Pro-AGG,0;tRNA-Pro-AGG-2-1,GGCTCGTTGGTCTAGGGGTATGATTCTCGCTTAGGGTGCGAGAGGTCCCGGGTTCAAATCCCGGACGAGCCCCCA,Pro-AGG,0;tRNA-Pro-CGG-1-1,GGCTCGTTGGTCTAGGGGTATGATTCTCGCTTCGGGTGCGAGAGGTCCCGGGTTCAAATCCCGGACGAGCCCCCA,Pro-CGG,0;tRNA-Pro-CGG-2-1,GGCTCGTTGGTCTAGGGGTATGATTCTCGCTTCGGGTGTGAGAGGTCCCGGGTTCAAATCCCGGACGAGCCCC…	302	580	355	620	108	150	201	268	597	25	240	2042	1181.59	980.19	989.991	2511.69	728.219	971.081	628.949	1168.14	1700.67	162.21	1050.79	3990.49
tiRNA-1:33-Pro-AGG-1-M2	GGCTCGTTGGTCTAGGGGTATGATTCTCGCTTA	tiRNA-5	-	-	33	tRNA-Pro-AGG-1-1,GGCTCGTTGGTCTAGGGGTATGATTCTCGCTTAGGATGCGAGAGGTCCCGGGTTCAAATCCCGGACGAGCCCCCA,Pro-AGG,0;tRNA-Pro-AGG-2-1,GGCTCGTTGGTCTAGGGGTATGATTCTCGCTTAGGGTGCGAGAGGTCCCGGGTTCAAATCCCGGACGAGCCCCCA,Pro-AGG,0	7	0	4	0	0	8	5	26	16	0	5	6	27.3879	0	11.1548	0	0	51.791	15.6455	113.327	45.5791	0	21.8914	11.7253
tiRNA-1:33-Pro-CGG-1-M2	GGCTCGTTGGTCTAGGGGTATGATTCTCGCTTC	tiRNA-5	-	tRF-33-6978WPRLXN4V05	33	tRNA-Pro-CGG-1-1,GGCTCGTTGGTCTAGGGGTATGATTCTCGCTTCGGGTGCGAGAGGTCCCGGGTTCAAATCCCGGACGAGCCCCCA,Pro-CGG,0;tRNA-Pro-CGG-2-1,GGCTCGTTGGTCTAGGGGTATGATTCTCGCTTCGGGTGTGAGAGGTCCCGGGTTCAAATCCCGGACGAGCCCCCA,Pro-CGG,0	42	3	6	0	0	43	23	58	60	8	184	31	164.328	5.06995	16.7322	0	0	278.377	71.9692	252.807	170.922	51.9073	805.604	60.5805
tiRNA-1:33-Pro-TGG-3	GGCTCGTTGGTCTAGGGGTATGATTCTCGCTTT	tiRNA-5	-	-	33	tRNA-Pro-TGG-3-1,GGCTCGTTGGTCTAGGGGTATGATTCTCGCTTTGGGTGCGAGAGGTCCCGGGTTCAAATCCCGGACGAGCCCCCA,Pro-TGG,0	36	2	12	5	4	34	16	66	49	7	102	69	140.852	3.37997	33.4645	20.2555	26.9711	220.112	50.0656	287.677	139.586	45.4189	446.585	134.84
tRF-1:30-Pro-TGG-2	GGCTCGTTGGTCTAGGGGTATGATTCTCGG	tRF-5c	-	tRF-30-6978WPRLXN48	30	tRNA-Pro-TGG-2-1,GGCTCGTTGGTCTAGGGGTATGATTCTCGGTTTGGGTCCGAGAGGTCCCGGGTTCAAATCCCGGACGAGCCCCCA,Pro-TGG,0	12	7	15	34	4	5	10	12	38	2	0	26	46.9507	11.8299	41.8306	137.738	26.9711	32.3694	31.291	52.3049	108.25	12.9768	0	50.8094
tRF-1:31-Pro-TGG-2	GGCTCGTTGGTCTAGGGGTATGATTCTCGGT	tRF-5c	-	tRF-31-6978WPRLXN48E	31	tRNA-Pro-TGG-2-1,GGCTCGTTGGTCTAGGGGTATGATTCTCGGTTTGGGTCCGAGAGGTCCCGGGTTCAAATCCCGGACGAGCCCCCA,Pro-TGG,0	2	5	0	2	0	0	0	6	11	1	0	26	7.82512	8.44991	0	8.10222	0	0	0	26.1525	31.3356	6.48841	0	50.8094
tRF-1:32-Pro-TGG-2	GGCTCGTTGGTCTAGGGGTATGATTCTCGGTT	tRF-5c	-	tRF-32-6978WPRLXN48Q	32	tRNA-Pro-TGG-2-1,GGCTCGTTGGTCTAGGGGTATGATTCTCGGTTTGGGTCCGAGAGGTCCCGGGTTCAAATCCCGGACGAGCCCCCA,Pro-TGG,0	2	4	1	4	2	4	1	4	12	0	0	30	7.82512	6.75993	2.78871	16.2044	13.4855	25.8955	3.1291	17.435	34.1843	0	0	58.6263
tiRNA-1:33-Pro-TGG-2	GGCTCGTTGGTCTAGGGGTATGATTCTCGGTTT	tiRNA-5	-	-	33	tRNA-Pro-TGG-2-1,GGCTCGTTGGTCTAGGGGTATGATTCTCGGTTTGGGTCCGAGAGGTCCCGGGTTCAAATCCCGGACGAGCCCCCA,Pro-TGG,0	2	0	0	0	0	2	0	3	2	0	2	22	7.82512	0	0	0	0	12.9477	0	13.0762	5.69739	0	8.75657	42.9926
tRF-1:16-Pro-TGG-1	GGCTCGTTGGTCTAGT	tRF-5a	-	-	16	tRNA-Pro-TGG-1-1,GGCTCGTTGGTCTAGTGGTATGATTCTCGCTTTGGGTGCGAGAGGTCCCGGGTTCAAATCCCGGACGAGCCCCCA,Pro-TGG,0	2	0	28	6	12	4	2	2	4	13	4	2	7.82512	0	78.0838	24.3067	80.9132	25.8955	6.25819	8.71748	11.3948	84.3493	17.5131	3.90842
tRF-1:24-Pro-TGG-1	GGCTCGTTGGTCTAGTGGTATGAT	tRF-5b	-	tRF-24-6978WP9LJ7	24	tRNA-Pro-TGG-1-1,GGCTCGTTGGTCTAGTGGTATGATTCTCGCTTTGGGTGCGAGAGGTCCCGGGTTCAAATCCCGGACGAGCCCCCA,Pro-TGG,0	0	0	12	0	0	0	0	5	3	65	1	2	0	0	33.4645	0	0	0	0	21.7937	8.54608	421.747	4.37828	3.90842
tRF-1:28-Pro-TGG-1	GGCTCGTTGGTCTAGTGGTATGATTCTC	tRF-5c	-	-	28	tRNA-Pro-TGG-1-1,GGCTCGTTGGTCTAGTGGTATGATTCTCGCTTTGGGTGCGAGAGGTCCCGGGTTCAAATCCCGGACGAGCCCCCA,Pro-TGG,0	66	1	94	27	0	18	50	79	78	1	2	12	258.229	1.68998	262.139	109.38	0	116.53	156.455	344.341	222.198	6.48841	8.75657	23.4505
tRF-1:29-Pro-TGG-1	GGCTCGTTGGTCTAGTGGTATGATTCTCG	tRF-5c	-	-	29	tRNA-Pro-TGG-1-1,GGCTCGTTGGTCTAGTGGTATGATTCTCGCTTTGGGTGCGAGAGGTCCCGGGTTCAAATCCCGGACGAGCCCCCA,Pro-TGG,0	74	2	42	10	3	17	54	78	114	14	8	42	289.53	3.37997	117.126	40.5111	20.2283	110.056	168.971	339.982	324.751	90.8377	35.0263	82.0768
tRF-1:30-Pro-TGG-1	GGCTCGTTGGTCTAGTGGTATGATTCTCGC	tRF-5c	-	tRF-30-6978WP9LXN4V	30	tRNA-Pro-TGG-1-1,GGCTCGTTGGTCTAGTGGTATGATTCTCGCTTTGGGTGCGAGAGGTCCCGGGTTCAAATCCCGGACGAGCCCCCA,Pro-TGG,0	0	2	0	1	1	0	0	0	7	1	27	1	0	3.37997	0	4.05111	6.74277	0	0	0	19.9409	6.48841	118.214	1.95421
tRF-1:31-Pro-TGG-1	GGCTCGTTGGTCTAGTGGTATGATTCTCGCT	tRF-5c	-	-	31	tRNA-Pro-TGG-1-1,GGCTCGTTGGTCTAGTGGTATGATTCTCGCTTTGGGTGCGAGAGGTCCCGGGTTCAAATCCCGGACGAGCCCCCA,Pro-TGG,0	2	5	2	2	3	2	0	2	8	2	7	6	7.82512	8.44991	5.57742	8.10222	20.2283	12.9477	0	8.71748	22.7896	12.9768	30.648	11.7253
tRF-1:32-Pro-TGG-1	GGCTCGTTGGTCTAGTGGTATGATTCTCGCTT	tRF-5c	-	-	32	tRNA-Pro-TGG-1-1,GGCTCGTTGGTCTAGTGGTATGATTCTCGCTTTGGGTGCGAGAGGTCCCGGGTTCAAATCCCGGACGAGCCCCCA,Pro-TGG,0	0	1	2	2	2	0	0	5	6	1	4	12	0	1.68998	5.57742	8.10222	13.4855	0	0	21.7937	17.0922	6.48841	17.5131	23.4505
tiRNA-1:33-Pro-TGG-1	GGCTCGTTGGTCTAGTGGTATGATTCTCGCTTT	tiRNA-5	-	-	33	tRNA-Pro-TGG-1-1,GGCTCGTTGGTCTAGTGGTATGATTCTCGCTTTGGGTGCGAGAGGTCCCGGGTTCAAATCCCGGACGAGCCCCCA,Pro-TGG,0	0	0	1	0	0	0	0	8	8	1	7	8	0	0	2.78871	0	0	0	0	34.8699	22.7896	6.48841	30.648	15.6337
tRF-1:29-Arg-TCT-2-M3	GGCTCTGTGGCGCAATGGATAGCGCATTG	tRF-5c	-	-	29	tRNA-Arg-TCT-2-1,GGCTCTGTGGCGCAATGGATAGCGCATTGGACTTCTAATTCAAAGGTTGTGGGTTCGAATCCCACCAGAGTCGCCA,Arg-TCT,0;tRNA-Arg-TCT-3-1,GGCTCTGTGGCGCAATGGATAGCGCATTGGACTTCTAATTCAAAGGTTGTGGGTTCGAGTCCCACCAGAGTCGCCA,Arg-TCT,0;tRNA-Arg-TCT-5-1,GGCTCTGTGGCGCAATGGATAGCGCATTGGACTTCTAATTCAAAGGTTGCGGGTTCGAGTCCCTCCAGAGTCGCCA,Arg-TCT,0	3	0	18	2	0	0	7	13	4	1	28	10	11.7377	0	50.1967	8.10222	0	0	21.9037	56.6636	11.3948	6.48841	122.592	19.5421
tRF-1:15-Thr-CGT-3	GGCTCTGTGGCTTAG	tRF-5a	-	-	15	tRNA-Thr-CGT-3-1,GGCTCTGTGGCTTAGTTGGCTAAAGCGCCTGTCTCGTAAACAGGAGATCCTGGGTTCGAATCCCAGCGGGGCCTCCA,Thr-CGT,0	1	0	0	2	0	4	4	0	1	2	0	3	3.91256	0	0	8.10222	0	25.8955	12.5164	0	2.84869	12.9768	0	5.86263
tRF-30:43-Gln-TTG-4	GGCTTTGAATCCAG	tRF-2	-	-	14	tRNA-Gln-TTG-4-1,GGTCCCATGGTGTAATGGTTAGCACTCTGGGCTTTGAATCCAGCAATCCGAGTTCGAATCTTGGTGGGACCTCCA,Gln-TTG,29	5	0	6	0	6	6	8	10	16	6	1	6	19.5628	0	16.7322	0	40.4566	38.8432	25.0328	43.5874	45.5791	38.9305	4.37828	11.7253
tRF-+1:T25-iMet-CAT-1-4	GGGAGCGTTTTGTGGATTTGTTTTT	tRF-1	-	-	25	pre_tRNA-iMet-CAT-1-4,AAAAAAGGTGACTATTAACTCTGGGACCTGTGACTCGCGTAGCAGAGTGGCGCAGCGGAAGCGTGCTGGGCCCATAACCCAGAGGTCGATGGATCGAAACCATCCTCTGCTAGGGAGCGTTTTGTGGATTTGTTTTTCCCCCTTCCAAAAAT,iMet-CAT,112	0	0	0	11	0	0	0	0	0	0	0	0	0	0	0	44.5622	0	0	0	0	0	0	0	0
tRF-1:23-Ala-AGC-11	GGGGAATTAGCTCAAATGGTAGA	tRF-5b	-	tRF-23-R2IP4OI3X	23	tRNA-Ala-AGC-11-1,GGGGAATTAGCTCAAATGGTAGAGCGCTCGCTTAGCATGCGAGAGGTAGCGGGATCGATGCCCGCATTCTCCACCA,Ala-AGC,0	0	0	5	5	0	4	0	1	0	0	21	34	0	0	13.9435	20.2555	0	25.8955	0	4.35874	0	0	91.944	66.4431
tRF-1:24-Ala-AGC-11	GGGGAATTAGCTCAAATGGTAGAG	tRF-5b	-	-	24	tRNA-Ala-AGC-11-1,GGGGAATTAGCTCAAATGGTAGAGCGCTCGCTTAGCATGCGAGAGGTAGCGGGATCGATGCCCGCATTCTCCACCA,Ala-AGC,0	0	0	0	0	0	0	0	10	0	0	0	0	0	0	0	0	0	0	0	43.5874	0	0	0	0
tRF-1:16-Ala-AGC-9	GGGGAATTAGCTCAGG	tRF-5a	-	-	16	tRNA-Ala-AGC-9-1,GGGGAATTAGCTCAGGCGGTAGAGCGCTCGCTTAGCATGCGAGAGGTAGCGGGATCGACGCCCGCATTCTCCACCA,Ala-AGC,0	4	0	0	5	0	8	0	13	0	0	0	0	15.6502	0	0	20.2555	0	51.791	0	56.6636	0	0	0	0
tRF-1:15-Cys-GCA-17	GGGGATATAGCTCAG	tRF-5a	-	-	15	tRNA-Cys-GCA-17-1,GGGGATATAGCTCAGGGGTAGAGCATTTGACTGCAGATCAAGAGGTCCCCGGTTCAAATCCGGGTGCCCCCCCCA,Cys-GCA,0	0	1	0	1	0	8	3	0	0	14	0	0	0	1.68998	0	4.05111	0	51.791	9.38729	0	0	90.8377	0	0
tRF-1:16-Cys-GCA-17	GGGGATATAGCTCAGG	tRF-5a	-	-	16	tRNA-Cys-GCA-17-1,GGGGATATAGCTCAGGGGTAGAGCATTTGACTGCAGATCAAGAGGTCCCCGGTTCAAATCCGGGTGCCCCCCCCA,Cys-GCA,0	0	2	0	2	11	6	5	8	0	0	0	2	0	3.37997	0	8.10222	74.1705	38.8432	15.6455	34.8699	0	0	0	3.90842
tRF-1:14-Ala-AGC-4-M7	GGGGATGTAGCTCA	tRF-5a	-	-	14	tRNA-Ala-AGC-4-1,GGGGATGTAGCTCAGTGGTAGAGCGCATGCTTAGCATGCATGAGGTCCCGGGTTCGATCCCCAGCATCTCCACCA,Ala-AGC,0;tRNA-Ala-CGC-1-1,GGGGATGTAGCTCAGTGGTAGAGCGCATGCTTCGCATGTATGAGGTCCCGGGTTCGATCCCCGGCATCTCCACCA,Ala-CGC,0;tRNA-Ala-CGC-2-1,GGGGATGTAGCTCAGTGGTAGAGCGCATGCTTCGCATGTATGAGGCCCCGGGTTCGATCCCCGGCATCTCCACCA,Ala-CGC,0;tRNA-Ala-CGC-3-1,GGGGATGTAGCTCAGTGGTAGAGCGCGCGCTTCGCATGTGTGAGGTCCCGGGTTCAATCCCCGGCATCTCCAC…	19	63	76	97	941	82	54	61	37	3	27	1	74.3387	106.469	211.942	392.958	6344.95	530.858	168.971	265.883	105.402	19.4652	118.214	1.95421
tRF-1:15-Ala-AGC-4-M7	GGGGATGTAGCTCAG	tRF-5a	-	-	15	tRNA-Ala-AGC-4-1,GGGGATGTAGCTCAGTGGTAGAGCGCATGCTTAGCATGCATGAGGTCCCGGGTTCGATCCCCAGCATCTCCACCA,Ala-AGC,0;tRNA-Ala-CGC-1-1,GGGGATGTAGCTCAGTGGTAGAGCGCATGCTTCGCATGTATGAGGTCCCGGGTTCGATCCCCGGCATCTCCACCA,Ala-CGC,0;tRNA-Ala-CGC-2-1,GGGGATGTAGCTCAGTGGTAGAGCGCATGCTTCGCATGTATGAGGCCCCGGGTTCGATCCCCGGCATCTCCACCA,Ala-CGC,0;tRNA-Ala-CGC-3-1,GGGGATGTAGCTCAGTGGTAGAGCGCGCGCTTCGCATGTGTGAGGTCCCGGGTTCAATCCCCGGCATCTCCAC…	16	57	53	53	164	103	17	33	1	1	14	44	62.601	96.329	147.802	214.709	1105.81	666.809	53.1947	143.838	2.84869	6.48841	61.296	85.9852
tRF-1:16-Ala-AGC-4-M7	GGGGATGTAGCTCAGT	tRF-5a	-	tRF-16-R29P4PE	16	tRNA-Ala-AGC-4-1,GGGGATGTAGCTCAGTGGTAGAGCGCATGCTTAGCATGCATGAGGTCCCGGGTTCGATCCCCAGCATCTCCACCA,Ala-AGC,0;tRNA-Ala-CGC-1-1,GGGGATGTAGCTCAGTGGTAGAGCGCATGCTTCGCATGTATGAGGTCCCGGGTTCGATCCCCGGCATCTCCACCA,Ala-CGC,0;tRNA-Ala-CGC-2-1,GGGGATGTAGCTCAGTGGTAGAGCGCATGCTTCGCATGTATGAGGCCCCGGGTTCGATCCCCGGCATCTCCACCA,Ala-CGC,0;tRNA-Ala-CGC-3-1,GGGGATGTAGCTCAGTGGTAGAGCGCGCGCTTCGCATGTGTGAGGTCCCGGGTTCAATCCCCGGCATCTCCAC…	81	118	98	146	857	132	40	72	13	43	2	51	316.918	199.418	273.293	591.462	5778.55	854.551	125.164	313.829	37.033	279.002	8.75657	99.6647
tRF-1:22-Ala-AGC-4-M7	GGGGATGTAGCTCAGTGGTAGA	tRF-5b	-	tRF-22-R29P4P9LL	22	tRNA-Ala-AGC-4-1,GGGGATGTAGCTCAGTGGTAGAGCGCATGCTTAGCATGCATGAGGTCCCGGGTTCGATCCCCAGCATCTCCACCA,Ala-AGC,0;tRNA-Ala-CGC-1-1,GGGGATGTAGCTCAGTGGTAGAGCGCATGCTTCGCATGTATGAGGTCCCGGGTTCGATCCCCGGCATCTCCACCA,Ala-CGC,0;tRNA-Ala-CGC-2-1,GGGGATGTAGCTCAGTGGTAGAGCGCATGCTTCGCATGTATGAGGCCCCGGGTTCGATCCCCGGCATCTCCACCA,Ala-CGC,0;tRNA-Ala-CGC-3-1,GGGGATGTAGCTCAGTGGTAGAGCGCGCGCTTCGCATGTGTGAGGTCCCGGGTTCAATCCCCGGCATCTCCAC…	16	7	15	12	28	18	2	1	0	0	27	44	62.601	11.8299	41.8306	48.6133	188.798	116.53	6.25819	4.35874	0	0	118.214	85.9852
tRF-1:23-Ala-AGC-4-M7	GGGGATGTAGCTCAGTGGTAGAG	tRF-5b	-	tRF-23-R29P4P9LDS	23	tRNA-Ala-AGC-4-1,GGGGATGTAGCTCAGTGGTAGAGCGCATGCTTAGCATGCATGAGGTCCCGGGTTCGATCCCCAGCATCTCCACCA,Ala-AGC,0;tRNA-Ala-CGC-1-1,GGGGATGTAGCTCAGTGGTAGAGCGCATGCTTCGCATGTATGAGGTCCCGGGTTCGATCCCCGGCATCTCCACCA,Ala-CGC,0;tRNA-Ala-CGC-2-1,GGGGATGTAGCTCAGTGGTAGAGCGCATGCTTCGCATGTATGAGGCCCCGGGTTCGATCCCCGGCATCTCCACCA,Ala-CGC,0;tRNA-Ala-CGC-3-1,GGGGATGTAGCTCAGTGGTAGAGCGCGCGCTTCGCATGTGTGAGGTCCCGGGTTCAATCCCCGGCATCTCCAC…	39	17	50	29	0	16	21	16	27	1	93	29	152.59	28.7297	139.435	117.482	0	103.582	65.711	69.7399	76.9147	6.48841	407.18	56.6721
tRF-1:24-Ala-AGC-4-M7	GGGGATGTAGCTCAGTGGTAGAGC	tRF-5b	-	tRF-24-R29P4P9LH9	24	tRNA-Ala-AGC-4-1,GGGGATGTAGCTCAGTGGTAGAGCGCATGCTTAGCATGCATGAGGTCCCGGGTTCGATCCCCAGCATCTCCACCA,Ala-AGC,0;tRNA-Ala-CGC-1-1,GGGGATGTAGCTCAGTGGTAGAGCGCATGCTTCGCATGTATGAGGTCCCGGGTTCGATCCCCGGCATCTCCACCA,Ala-CGC,0;tRNA-Ala-CGC-2-1,GGGGATGTAGCTCAGTGGTAGAGCGCATGCTTCGCATGTATGAGGCCCCGGGTTCGATCCCCGGCATCTCCACCA,Ala-CGC,0;tRNA-Ala-CGC-3-1,GGGGATGTAGCTCAGTGGTAGAGCGCGCGCTTCGCATGTGTGAGGTCCCGGGTTCAATCCCCGGCATCTCCAC…	22	26	58	31	50	38	51	25	28	0	41	57	86.0764	43.9396	161.745	125.584	337.139	246.007	159.584	108.969	79.7634	0	179.51	111.39
tRF-1:30-Ala-AGC-4-M6	GGGGATGTAGCTCAGTGGTAGAGCGCATGC	tRF-5c	-	tRF-30-R29P4P9L5HJV	30	tRNA-Ala-AGC-4-1,GGGGATGTAGCTCAGTGGTAGAGCGCATGCTTAGCATGCATGAGGTCCCGGGTTCGATCCCCAGCATCTCCACCA,Ala-AGC,0;tRNA-Ala-CGC-1-1,GGGGATGTAGCTCAGTGGTAGAGCGCATGCTTCGCATGTATGAGGTCCCGGGTTCGATCCCCGGCATCTCCACCA,Ala-CGC,0;tRNA-Ala-CGC-2-1,GGGGATGTAGCTCAGTGGTAGAGCGCATGCTTCGCATGTATGAGGCCCCGGGTTCGATCCCCGGCATCTCCACCA,Ala-CGC,0;tRNA-Ala-TGC-2-1,GGGGATGTAGCTCAGTGGTAGAGCGCATGCTTTGCATGTATGAGGTCCCGGGTTCGATCCCCGGCATCTCCAC…	4	5	2	12	0	0	1	4	4	8	1	0	15.6502	8.44991	5.57742	48.6133	0	0	3.1291	17.435	11.3948	51.9073	4.37828	0
tRF-1:31-Ala-AGC-4-M6	GGGGATGTAGCTCAGTGGTAGAGCGCATGCT	tRF-5c	-	tRF-31-R29P4P9L5HJVE	31	tRNA-Ala-AGC-4-1,GGGGATGTAGCTCAGTGGTAGAGCGCATGCTTAGCATGCATGAGGTCCCGGGTTCGATCCCCAGCATCTCCACCA,Ala-AGC,0;tRNA-Ala-CGC-1-1,GGGGATGTAGCTCAGTGGTAGAGCGCATGCTTCGCATGTATGAGGTCCCGGGTTCGATCCCCGGCATCTCCACCA,Ala-CGC,0;tRNA-Ala-CGC-2-1,GGGGATGTAGCTCAGTGGTAGAGCGCATGCTTCGCATGTATGAGGCCCCGGGTTCGATCCCCGGCATCTCCACCA,Ala-CGC,0;tRNA-Ala-TGC-2-1,GGGGATGTAGCTCAGTGGTAGAGCGCATGCTTTGCATGTATGAGGTCCCGGGTTCGATCCCCGGCATCTCCAC…	0	4	4	6	2	0	3	5	2	0	0	19	0	6.75993	11.1548	24.3067	13.4855	0	9.38729	21.7937	5.69739	0	0	37.13
tRF-1:32-Ala-AGC-4-M6	GGGGATGTAGCTCAGTGGTAGAGCGCATGCTT	tRF-5c	-	tRF-32-R29P4P9L5HJVQ	32	tRNA-Ala-AGC-4-1,GGGGATGTAGCTCAGTGGTAGAGCGCATGCTTAGCATGCATGAGGTCCCGGGTTCGATCCCCAGCATCTCCACCA,Ala-AGC,0;tRNA-Ala-CGC-1-1,GGGGATGTAGCTCAGTGGTAGAGCGCATGCTTCGCATGTATGAGGTCCCGGGTTCGATCCCCGGCATCTCCACCA,Ala-CGC,0;tRNA-Ala-CGC-2-1,GGGGATGTAGCTCAGTGGTAGAGCGCATGCTTCGCATGTATGAGGCCCCGGGTTCGATCCCCGGCATCTCCACCA,Ala-CGC,0;tRNA-Ala-TGC-2-1,GGGGATGTAGCTCAGTGGTAGAGCGCATGCTTTGCATGTATGAGGTCCCGGGTTCGATCCCCGGCATCTCCAC…	0	1	2	1	1	1	2	1	3	0	50	38	0	1.68998	5.57742	4.05111	6.74277	6.47387	6.25819	4.35874	8.54608	0	218.914	74.2599
tRF-1:28-Ala-CGC-3	GGGGATGTAGCTCAGTGGTAGAGCGCGC	tRF-5c	-	tRF-28-R29P4P9L5HDM	28	tRNA-Ala-CGC-3-1,GGGGATGTAGCTCAGTGGTAGAGCGCGCGCTTCGCATGTGTGAGGTCCCGGGTTCAATCCCCGGCATCTCCACCA,Ala-CGC,0	0	9	0	5	0	0	0	0	7	5	0	0	0	15.2098	0	20.2555	0	0	0	0	19.9409	32.442	0	0
tRF-1:29-Ala-CGC-3	GGGGATGTAGCTCAGTGGTAGAGCGCGCG	tRF-5c	-	-	29	tRNA-Ala-CGC-3-1,GGGGATGTAGCTCAGTGGTAGAGCGCGCGCTTCGCATGTGTGAGGTCCCGGGTTCAATCCCCGGCATCTCCACCA,Ala-CGC,0	6	11	6	8	7	5	0	1	17	3	0	0	23.4754	18.5898	16.7322	32.4089	47.1994	32.3694	0	4.35874	48.4278	19.4652	0	0
tRF-1:31-Ala-CGC-3	GGGGATGTAGCTCAGTGGTAGAGCGCGCGCT	tRF-5c	-	-	31	tRNA-Ala-CGC-3-1,GGGGATGTAGCTCAGTGGTAGAGCGCGCGCTTCGCATGTGTGAGGTCCCGGGTTCAATCCCCGGCATCTCCACCA,Ala-CGC,0	0	4	12	2	0	0	4	0	2	0	0	0	0	6.75993	33.4645	8.10222	0	0	12.5164	0	5.69739	0	0	0
tRF-1:15-Ala-AGC-1-M15	GGGGGTATAGCTCAG	tRF-5a	5016a	-	15	tRNA-Ala-AGC-1-1,GGGGGTATAGCTCAGTGGTAGAGCGCGTGCTTAGCATGCACGAGGTCCTGGGTTCGATCCCCAGTACCTCCACCA,Ala-AGC,0;tRNA-Ala-AGC-6-1,GGGGGTATAGCTCAGCGGTAGAGCGCGTGCTTAGCATGCACGAGGTCCTGGGTTCAATCCCCAATACCTCCACCA,Ala-AGC,0;tRNA-Cys-GCA-10-1,GGGGGTATAGCTCAGGGGTAGAGCATTTGACTGCAGATCAAGAGGTCCCTGGTTCAAATCCAGGTGCCCCCCCCA,Cys-GCA,0;tRNA-Cys-GCA-13-1,GGGGGTATAGCTCAGGGGTAGAGCATTTGACTGCAGATCAAGAGGTCCCCAGTTCAAATCTGGGTGCCCCC…	4	0	0	1	0	0	0	0	0	14	0	0	15.6502	0	0	4.05111	0	0	0	0	0	90.8377	0	0
tRF-1:16-Ala-AGC-6	GGGGGTATAGCTCAGC	tRF-5a	-	-	16	tRNA-Ala-AGC-6-1,GGGGGTATAGCTCAGCGGTAGAGCGCGTGCTTAGCATGCACGAGGTCCTGGGTTCAATCCCCAATACCTCCACCA,Ala-AGC,0	0	0	2	0	0	0	1	0	0	0	14	0	0	0	5.57742	0	0	0	3.1291	0	0	0	61.296	0
tRF-1:24-Ala-AGC-1-M3	GGGGGTATAGCTCAGTGGTAGAGC	tRF-5b	-	tRF-24-RKVP4P9LH9	24	tRNA-Ala-AGC-1-1,GGGGGTATAGCTCAGTGGTAGAGCGCGTGCTTAGCATGCACGAGGTCCTGGGTTCGATCCCCAGTACCTCCACCA,Ala-AGC,0;tRNA-Cys-GCA-2-1,GGGGGTATAGCTCAGTGGTAGAGCATTTGACTGCAGATCAAGAGGTCCCCGGTTCAAATCCGGGTGCCCCCTCCA,Cys-GCA,0;tRNA-Cys-GCA-4-1,GGGGGTATAGCTCAGTGGTAGAGCATTTGACTGCAGATCAAGAGGTCCCTGGTTCAAATCCGGGTGCCCCCTCCA,Cys-GCA,0	7	0	0	0	0	0	0	0	7	0	0	0	27.3879	0	0	0	0	0	0	0	19.9409	0	0	0
tRF-1:14-Ala-AGC-2-M11	GGGGGTGTAGCTCA	tRF-5a	-	-	14	tRNA-Ala-AGC-2-1,GGGGGTGTAGCTCAGTGGTAGAGCGCGTGCTTAGCATGCACGAGGCCCCGGGTTCAATCCCCGGCACCTCCACCA,Ala-AGC,0;tRNA-Ala-AGC-3-1,GGGGGTGTAGCTCAGTGGTAGAGCGCGTGCTTAGCATGTACGAGGTCCCGGGTTCAATCCCCGGCACCTCCACCA,Ala-AGC,0;tRNA-Ala-AGC-5-1,GGGGGTGTAGCTCAGTGGTAGAGCGCGTGCTTAGCATGCACGAGGCCCTGGGTTCAATCCCCAGCACCTCCACCA,Ala-AGC,0;tRNA-Ala-AGC-7-1,GGGGGTGTAGCTCAGTGGTAGAGCGCGTGCTTAGCATGCACGAGGCCCCGGGTTCAATCCCTGGCACCTCCAC…	23	4	8	6	18	7	26	0	20	0	0	0	89.9889	6.75993	22.3097	24.3067	121.37	45.3171	81.3565	0	56.9739	0	0	0
tRF-1:15-Ala-AGC-2-M11	GGGGGTGTAGCTCAG	tRF-5a	-	-	15	tRNA-Ala-AGC-2-1,GGGGGTGTAGCTCAGTGGTAGAGCGCGTGCTTAGCATGCACGAGGCCCCGGGTTCAATCCCCGGCACCTCCACCA,Ala-AGC,0;tRNA-Ala-AGC-3-1,GGGGGTGTAGCTCAGTGGTAGAGCGCGTGCTTAGCATGTACGAGGTCCCGGGTTCAATCCCCGGCACCTCCACCA,Ala-AGC,0;tRNA-Ala-AGC-5-1,GGGGGTGTAGCTCAGTGGTAGAGCGCGTGCTTAGCATGCACGAGGCCCTGGGTTCAATCCCCAGCACCTCCACCA,Ala-AGC,0;tRNA-Ala-AGC-7-1,GGGGGTGTAGCTCAGTGGTAGAGCGCGTGCTTAGCATGCACGAGGCCCCGGGTTCAATCCCTGGCACCTCCAC…	7	6	9	3	1	4	14	3	4	0	0	2	27.3879	10.1399	25.0984	12.1533	6.74277	25.8955	43.8074	13.0762	11.3948	0	0	3.90842
tRF-1:16-Ala-AGC-2-M11	GGGGGTGTAGCTCAGT	tRF-5a	-	-	16	tRNA-Ala-AGC-2-1,GGGGGTGTAGCTCAGTGGTAGAGCGCGTGCTTAGCATGCACGAGGCCCCGGGTTCAATCCCCGGCACCTCCACCA,Ala-AGC,0;tRNA-Ala-AGC-3-1,GGGGGTGTAGCTCAGTGGTAGAGCGCGTGCTTAGCATGTACGAGGTCCCGGGTTCAATCCCCGGCACCTCCACCA,Ala-AGC,0;tRNA-Ala-AGC-5-1,GGGGGTGTAGCTCAGTGGTAGAGCGCGTGCTTAGCATGCACGAGGCCCTGGGTTCAATCCCCAGCACCTCCACCA,Ala-AGC,0;tRNA-Ala-AGC-7-1,GGGGGTGTAGCTCAGTGGTAGAGCGCGTGCTTAGCATGCACGAGGCCCCGGGTTCAATCCCTGGCACCTCCAC…	42	24	12	20	57	16	36	38	20	33	23	1	164.328	40.5596	33.4645	81.0222	384.338	103.582	112.647	165.632	56.9739	214.117	100.701	1.95421
tRF-1:22-Ala-AGC-2-M11	GGGGGTGTAGCTCAGTGGTAGA	tRF-5b	-	tRF-22-RK9P4P9LL	22	tRNA-Ala-AGC-2-1,GGGGGTGTAGCTCAGTGGTAGAGCGCGTGCTTAGCATGCACGAGGCCCCGGGTTCAATCCCCGGCACCTCCACCA,Ala-AGC,0;tRNA-Ala-AGC-3-1,GGGGGTGTAGCTCAGTGGTAGAGCGCGTGCTTAGCATGTACGAGGTCCCGGGTTCAATCCCCGGCACCTCCACCA,Ala-AGC,0;tRNA-Ala-AGC-5-1,GGGGGTGTAGCTCAGTGGTAGAGCGCGTGCTTAGCATGCACGAGGCCCTGGGTTCAATCCCCAGCACCTCCACCA,Ala-AGC,0;tRNA-Ala-AGC-7-1,GGGGGTGTAGCTCAGTGGTAGAGCGCGTGCTTAGCATGCACGAGGCCCCGGGTTCAATCCCTGGCACCTCCAC…	3	4	8	7	0	0	0	11	0	0	0	0	11.7377	6.75993	22.3097	28.3578	0	0	0	47.9462	0	0	0	0
tRF-1:23-Ala-AGC-2-M11	GGGGGTGTAGCTCAGTGGTAGAG	tRF-5b	-	tRF-23-RK9P4P9LDS	23	tRNA-Ala-AGC-2-1,GGGGGTGTAGCTCAGTGGTAGAGCGCGTGCTTAGCATGCACGAGGCCCCGGGTTCAATCCCCGGCACCTCCACCA,Ala-AGC,0;tRNA-Ala-AGC-3-1,GGGGGTGTAGCTCAGTGGTAGAGCGCGTGCTTAGCATGTACGAGGTCCCGGGTTCAATCCCCGGCACCTCCACCA,Ala-AGC,0;tRNA-Ala-AGC-5-1,GGGGGTGTAGCTCAGTGGTAGAGCGCGTGCTTAGCATGCACGAGGCCCTGGGTTCAATCCCCAGCACCTCCACCA,Ala-AGC,0;tRNA-Ala-AGC-7-1,GGGGGTGTAGCTCAGTGGTAGAGCGCGTGCTTAGCATGCACGAGGCCCCGGGTTCAATCCCTGGCACCTCCAC…	13	3	5	9	0	8	7	0	0	0	0	0	50.8633	5.06995	13.9435	36.46	0	51.791	21.9037	0	0	0	0	0
tRF-1:24-Ala-AGC-2-M11	GGGGGTGTAGCTCAGTGGTAGAGC	tRF-5b	5017b	tRF-24-RK9P4P9LH9	24	tRNA-Ala-AGC-2-1,GGGGGTGTAGCTCAGTGGTAGAGCGCGTGCTTAGCATGCACGAGGCCCCGGGTTCAATCCCCGGCACCTCCACCA,Ala-AGC,0;tRNA-Ala-AGC-3-1,GGGGGTGTAGCTCAGTGGTAGAGCGCGTGCTTAGCATGTACGAGGTCCCGGGTTCAATCCCCGGCACCTCCACCA,Ala-AGC,0;tRNA-Ala-AGC-5-1,GGGGGTGTAGCTCAGTGGTAGAGCGCGTGCTTAGCATGCACGAGGCCCTGGGTTCAATCCCCAGCACCTCCACCA,Ala-AGC,0;tRNA-Ala-AGC-7-1,GGGGGTGTAGCTCAGTGGTAGAGCGCGTGCTTAGCATGCACGAGGCCCCGGGTTCAATCCCTGGCACCTCCAC…	51	29	15	40	16	23	90	34	32	0	0	3	199.541	49.0095	41.8306	162.044	107.884	148.899	281.619	148.197	91.1582	0	0	5.86263
tRF-1:29-Ala-AGC-2-M5	GGGGGTGTAGCTCAGTGGTAGAGCGCGTG	tRF-5c	-	-	29	tRNA-Ala-AGC-2-1,GGGGGTGTAGCTCAGTGGTAGAGCGCGTGCTTAGCATGCACGAGGCCCCGGGTTCAATCCCCGGCACCTCCACCA,Ala-AGC,0;tRNA-Ala-AGC-3-1,GGGGGTGTAGCTCAGTGGTAGAGCGCGTGCTTAGCATGTACGAGGTCCCGGGTTCAATCCCCGGCACCTCCACCA,Ala-AGC,0;tRNA-Ala-AGC-5-1,GGGGGTGTAGCTCAGTGGTAGAGCGCGTGCTTAGCATGCACGAGGCCCTGGGTTCAATCCCCAGCACCTCCACCA,Ala-AGC,0;tRNA-Ala-AGC-7-1,GGGGGTGTAGCTCAGTGGTAGAGCGCGTGCTTAGCATGCACGAGGCCCCGGGTTCAATCCCTGGCACCTCCAC…	0	0	0	5	0	1	0	0	2	0	0	0	0	0	0	20.2555	0	6.47387	0	0	5.69739	0	0	0
tRF-1:30-Ala-AGC-2-M5	GGGGGTGTAGCTCAGTGGTAGAGCGCGTGC	tRF-5c	5017c	tRF-30-RK9P4P9L5HMV	30	tRNA-Ala-AGC-2-1,GGGGGTGTAGCTCAGTGGTAGAGCGCGTGCTTAGCATGCACGAGGCCCCGGGTTCAATCCCCGGCACCTCCACCA,Ala-AGC,0;tRNA-Ala-AGC-3-1,GGGGGTGTAGCTCAGTGGTAGAGCGCGTGCTTAGCATGTACGAGGTCCCGGGTTCAATCCCCGGCACCTCCACCA,Ala-AGC,0;tRNA-Ala-AGC-5-1,GGGGGTGTAGCTCAGTGGTAGAGCGCGTGCTTAGCATGCACGAGGCCCTGGGTTCAATCCCCAGCACCTCCACCA,Ala-AGC,0;tRNA-Ala-AGC-7-1,GGGGGTGTAGCTCAGTGGTAGAGCGCGTGCTTAGCATGCACGAGGCCCCGGGTTCAATCCCTGGCACCTCCAC…	1	0	2	15	0	0	0	3	1	1	0	3	3.91256	0	5.57742	60.7666	0	0	0	13.0762	2.84869	6.48841	0	5.86263
tRF-1:15-Leu-AAG-1-M6	GGTAGCGTGGCCGAG	tRF-5a	-	-	15	tRNA-Leu-AAG-1-1,GGTAGCGTGGCCGAGCGGTCTAAGGCGCTGGATTAAGGCTCCAGTCTCTTCGGAGGCGTGGGTTCGAATCCCACCGCTGCCACCA,Leu-AAG,0;tRNA-Leu-AAG-2-1,GGTAGCGTGGCCGAGCGGTCTAAGGCGCTGGATTAAGGCTCCAGTCTCTTCGGGGGCGTGGGTTCGAATCCCACCGCTGCCACCA,Leu-AAG,0;tRNA-Leu-AAG-3-1,GGTAGCGTGGCCGAGCGGTCTAAGGCGCTGGATTAAGGCTCCAGTCTCTTCGGGGGCGTGGGTTCAAATCCCACCGCTGCCACCA,Leu-AAG,0;tRNA-Leu-AAG-4-1,GGTAGCGTGGCCGAGTGGTCTAAGACGCTGGATTAAGGCTCCA…	23	17	58	4	93	35	86	26	32	51	19	55	89.9889	28.7297	161.745	16.2044	627.078	226.586	269.102	113.327	91.1582	330.909	83.1874	107.481
tRF-1:16-Leu-AAG-1-M4	GGTAGCGTGGCCGAGC	tRF-5a	5019a	tRF-16-RPM830D	16	tRNA-Leu-AAG-1-1,GGTAGCGTGGCCGAGCGGTCTAAGGCGCTGGATTAAGGCTCCAGTCTCTTCGGAGGCGTGGGTTCGAATCCCACCGCTGCCACCA,Leu-AAG,0;tRNA-Leu-AAG-2-1,GGTAGCGTGGCCGAGCGGTCTAAGGCGCTGGATTAAGGCTCCAGTCTCTTCGGGGGCGTGGGTTCGAATCCCACCGCTGCCACCA,Leu-AAG,0;tRNA-Leu-AAG-3-1,GGTAGCGTGGCCGAGCGGTCTAAGGCGCTGGATTAAGGCTCCAGTCTCTTCGGGGGCGTGGGTTCAAATCCCACCGCTGCCACCA,Leu-AAG,0;tRNA-Leu-TAG-1-1,GGTAGCGTGGCCGAGCGGTCTAAGGCGCTGGATTTAGGCTCCA…	55	780	440	186	522	46	442	252	160	735	52	240	215.191	1318.19	1227.03	753.506	3519.73	297.798	1383.06	1098.4	455.791	4768.98	227.671	469.01
tRF-1:22-Leu-AAG-1-M4	GGTAGCGTGGCCGAGCGGTCTA	tRF-5b	-	tRF-22-RPM830MMO	22	tRNA-Leu-AAG-1-1,GGTAGCGTGGCCGAGCGGTCTAAGGCGCTGGATTAAGGCTCCAGTCTCTTCGGAGGCGTGGGTTCGAATCCCACCGCTGCCACCA,Leu-AAG,0;tRNA-Leu-AAG-2-1,GGTAGCGTGGCCGAGCGGTCTAAGGCGCTGGATTAAGGCTCCAGTCTCTTCGGGGGCGTGGGTTCGAATCCCACCGCTGCCACCA,Leu-AAG,0;tRNA-Leu-AAG-3-1,GGTAGCGTGGCCGAGCGGTCTAAGGCGCTGGATTAAGGCTCCAGTCTCTTCGGGGGCGTGGGTTCAAATCCCACCGCTGCCACCA,Leu-AAG,0;tRNA-Leu-TAG-1-1,GGTAGCGTGGCCGAGCGGTCTAAGGCGCTGGATTTAGGCTCCA…	7	0	0	0	0	0	14	11	0	1	0	0	27.3879	0	0	0	0	0	43.8074	47.9462	0	6.48841	0	0
tRF-1:23-Leu-AAG-1-M4	GGTAGCGTGGCCGAGCGGTCTAA	tRF-5b	-	tRF-23-RPM830MM0F	23	tRNA-Leu-AAG-1-1,GGTAGCGTGGCCGAGCGGTCTAAGGCGCTGGATTAAGGCTCCAGTCTCTTCGGAGGCGTGGGTTCGAATCCCACCGCTGCCACCA,Leu-AAG,0;tRNA-Leu-AAG-2-1,GGTAGCGTGGCCGAGCGGTCTAAGGCGCTGGATTAAGGCTCCAGTCTCTTCGGGGGCGTGGGTTCGAATCCCACCGCTGCCACCA,Leu-AAG,0;tRNA-Leu-AAG-3-1,GGTAGCGTGGCCGAGCGGTCTAAGGCGCTGGATTAAGGCTCCAGTCTCTTCGGGGGCGTGGGTTCAAATCCCACCGCTGCCACCA,Leu-AAG,0;tRNA-Leu-TAG-1-1,GGTAGCGTGGCCGAGCGGTCTAAGGCGCTGGATTTAGGCTCCA…	5	2	6	6	0	0	0	3	0	0	0	0	19.5628	3.37997	16.7322	24.3067	0	0	0	13.0762	0	0	0	0
tRF-1:24-Leu-AAG-1-M4	GGTAGCGTGGCCGAGCGGTCTAAG	tRF-5b	5019b	tRF-24-RPM830MM2S	24	tRNA-Leu-AAG-1-1,GGTAGCGTGGCCGAGCGGTCTAAGGCGCTGGATTAAGGCTCCAGTCTCTTCGGAGGCGTGGGTTCGAATCCCACCGCTGCCACCA,Leu-AAG,0;tRNA-Leu-AAG-2-1,GGTAGCGTGGCCGAGCGGTCTAAGGCGCTGGATTAAGGCTCCAGTCTCTTCGGGGGCGTGGGTTCGAATCCCACCGCTGCCACCA,Leu-AAG,0;tRNA-Leu-AAG-3-1,GGTAGCGTGGCCGAGCGGTCTAAGGCGCTGGATTAAGGCTCCAGTCTCTTCGGGGGCGTGGGTTCAAATCCCACCGCTGCCACCA,Leu-AAG,0;tRNA-Leu-TAG-1-1,GGTAGCGTGGCCGAGCGGTCTAAGGCGCTGGATTTAGGCTCCA…	5	1	0	4	0	10	0	0	20	0	35	0	19.5628	1.68998	0	16.2044	0	64.7387	0	0	56.9739	0	153.24	0
tRF-1:16-Leu-AAG-4-M2	GGTAGCGTGGCCGAGT	tRF-5a	-	tRF-16-RPM830E	16	tRNA-Leu-AAG-4-1,GGTAGCGTGGCCGAGTGGTCTAAGACGCTGGATTAAGGCTCCAGTCTCTTCGGGGGCGTGGGTTTGAATCCCACCGCTGCCACCA,Leu-AAG,0;tRNA-Leu-TAG-3-1,GGTAGCGTGGCCGAGTGGTCTAAGGCGCTGGATTTAGGCTCCAGTCATTTCGATGGCGTGGGTTCGAATCCCACCGCTGCCACCA,Leu-TAG,0	37	226	178	138	230	16	202	71	44	138	8	50	144.765	381.936	496.39	559.053	1550.84	103.582	632.078	309.471	125.343	895.4	35.0263	97.7104
tRF-1:22-Leu-AAG-4-M2	GGTAGCGTGGCCGAGTGGTCTA	tRF-5b	-	tRF-22-RPM8309MO	22	tRNA-Leu-AAG-4-1,GGTAGCGTGGCCGAGTGGTCTAAGACGCTGGATTAAGGCTCCAGTCTCTTCGGGGGCGTGGGTTTGAATCCCACCGCTGCCACCA,Leu-AAG,0;tRNA-Leu-TAG-3-1,GGTAGCGTGGCCGAGTGGTCTAAGGCGCTGGATTTAGGCTCCAGTCATTTCGATGGCGTGGGTTCGAATCCCACCGCTGCCACCA,Leu-TAG,0	0	3	0	7	0	0	0	0	0	0	0	0	0	5.06995	0	28.3578	0	0	0	0	0	0	0	0
tRF-1:14-Leu-TAG-2	GGTAGTGTGGCCGA	tRF-5a	-	-	14	tRNA-Leu-TAG-2-1,GGTAGTGTGGCCGAGCGGTCTAAGGCGCTGGATTTAGGCTCCAGTCTCTTCGGGGGCGTGGGTTCGAATCCCACCACTGCCACCA,Leu-TAG,0	1	0	0	5	0	0	0	0	0	0	0	0	3.91256	0	0	20.2555	0	0	0	0	0	0	0	0
tRF-1:15-Leu-TAG-2	GGTAGTGTGGCCGAG	tRF-5a	-	-	15	tRNA-Leu-TAG-2-1,GGTAGTGTGGCCGAGCGGTCTAAGGCGCTGGATTTAGGCTCCAGTCTCTTCGGGGGCGTGGGTTCGAATCCCACCACTGCCACCA,Leu-TAG,0	0	0	0	0	1	0	0	0	16	0	0	0	0	0	0	0	6.74277	0	0	0	45.5791	0	0	0
tRF-1:16-Leu-TAG-2	GGTAGTGTGGCCGAGC	tRF-5a	-	tRF-16-RP9830D	16	tRNA-Leu-TAG-2-1,GGTAGTGTGGCCGAGCGGTCTAAGGCGCTGGATTTAGGCTCCAGTCTCTTCGGGGGCGTGGGTTCGAATCCCACCACTGCCACCA,Leu-TAG,0	9	7	11	4	26	14	26	12	1	54	1	2	35.2131	11.8299	30.6758	16.2044	175.312	90.6342	81.3565	52.3049	2.84869	350.374	4.37828	3.90842
tRF-1:29-Gln-TTG-1-M3	GGTCCCATGGTGTAATGGTTAGCACTCTG	tRF-5c	-	tRF-29-RRJ89O9NF5JP	29	tRNA-Gln-TTG-1-1,GGTCCCATGGTGTAATGGTTAGCACTCTGGACTTTGAATCCAGCGATCCGAGTTCAAATCTCGGTGGGACCTCCA,Gln-TTG,0;tRNA-Gln-TTG-2-1,GGTCCCATGGTGTAATGGTTAGCACTCTGGACTTTGAATCCAGCAATCCGAGTTCGAATCTCGGTGGGACCTCCA,Gln-TTG,0;tRNA-Gln-TTG-4-1,GGTCCCATGGTGTAATGGTTAGCACTCTGGGCTTTGAATCCAGCAATCCGAGTTCGAATCTTGGTGGGACCTCCA,Gln-TTG,0	544	1	554	114	38	151	250	846	914	39	32	264	2128.43	1.68998	1544.94	461.826	256.225	977.555	782.274	3687.5	2603.71	253.048	140.105	515.911
tRF-1:30-Gln-TTG-1-M3	GGTCCCATGGTGTAATGGTTAGCACTCTGG	tRF-5c	-	tRF-30-RRJ89O9NF5W8	30	tRNA-Gln-TTG-1-1,GGTCCCATGGTGTAATGGTTAGCACTCTGGACTTTGAATCCAGCGATCCGAGTTCAAATCTCGGTGGGACCTCCA,Gln-TTG,0;tRNA-Gln-TTG-2-1,GGTCCCATGGTGTAATGGTTAGCACTCTGGACTTTGAATCCAGCAATCCGAGTTCGAATCTCGGTGGGACCTCCA,Gln-TTG,0;tRNA-Gln-TTG-4-1,GGTCCCATGGTGTAATGGTTAGCACTCTGGGCTTTGAATCCAGCAATCCGAGTTCGAATCTTGGTGGGACCTCCA,Gln-TTG,0	2	0	4	1	0	1	0	6	1	0	0	0	7.82512	0	11.1548	4.05111	0	6.47387	0	26.1525	2.84869	0	0	0
tiRNA-1:34-Gln-TTG-1-M2	GGTCCCATGGTGTAATGGTTAGCACTCTGGACTT	tiRNA-5	-	-	34	tRNA-Gln-TTG-1-1,GGTCCCATGGTGTAATGGTTAGCACTCTGGACTTTGAATCCAGCGATCCGAGTTCAAATCTCGGTGGGACCTCCA,Gln-TTG,0;tRNA-Gln-TTG-2-1,GGTCCCATGGTGTAATGGTTAGCACTCTGGACTTTGAATCCAGCAATCCGAGTTCGAATCTCGGTGGGACCTCCA,Gln-TTG,0	0	0	0	0	0	0	0	0	0	0	8	0	0	0	0	0	0	0	0	0	0	0	35.0263	0
tRF-1:14-Val-TAC-1-M3	GGTTCCATAGTGTA	tRF-5a	5020a	-	14	tRNA-Val-TAC-1-1,GGTTCCATAGTGTAGTGGTTATCACGTCTGCTTTACACGCAGAAGGTCCTGGGTTCGAGCCCCAGTGGAACCACCA,Val-TAC,0;tRNA-Val-TAC-2-1,GGTTCCATAGTGTAGCGGTTATCACGTCTGCTTTACACGCAGAAGGTCCTGGGTTCGAGCCCCAGTGGAACCACCA,Val-TAC,0;tRNA-Val-TAC-3-1,GGTTCCATAGTGTAGTGGTTATCACATCTGCTTTACACGCAGAAGGTCCTGGGTTCAAGCCCCAGTGGAACCACCA,Val-TAC,0	0	3	0	0	0	0	0	0	0	0	10	0	0	5.06995	0	0	0	0	0	0	0	0	43.7828	0
tRF-1:15-Val-TAC-1-M3	GGTTCCATAGTGTAG	tRF-5a	-	-	15	tRNA-Val-TAC-1-1,GGTTCCATAGTGTAGTGGTTATCACGTCTGCTTTACACGCAGAAGGTCCTGGGTTCGAGCCCCAGTGGAACCACCA,Val-TAC,0;tRNA-Val-TAC-2-1,GGTTCCATAGTGTAGCGGTTATCACGTCTGCTTTACACGCAGAAGGTCCTGGGTTCGAGCCCCAGTGGAACCACCA,Val-TAC,0;tRNA-Val-TAC-3-1,GGTTCCATAGTGTAGTGGTTATCACATCTGCTTTACACGCAGAAGGTCCTGGGTTCAAGCCCCAGTGGAACCACCA,Val-TAC,0	1	13	33	15	66	58	30	1	2	0	159	32	3.91256	21.9698	92.0274	60.7666	445.023	375.485	93.8729	4.35874	5.69739	0	696.147	62.5347
tRF-1:23-Val-TAC-2	GGTTCCATAGTGTAGCGGTTATC	tRF-5b	-	-	23	tRNA-Val-TAC-2-1,GGTTCCATAGTGTAGCGGTTATCACGTCTGCTTTACACGCAGAAGGTCCTGGGTTCGAGCCCCAGTGGAACCACCA,Val-TAC,0	0	0	0	6	0	0	0	0	0	0	0	0	0	0	0	24.3067	0	0	0	0	0	0	0	0
tRF-1:30-Val-TAC-2	GGTTCCATAGTGTAGCGGTTATCACGTCTG	tRF-5c	-	tRF-30-R9JP9PMNH5SY	30	tRNA-Val-TAC-2-1,GGTTCCATAGTGTAGCGGTTATCACGTCTGCTTTACACGCAGAAGGTCCTGGGTTCGAGCCCCAGTGGAACCACCA,Val-TAC,0	4	0	5	2	0	1	0	8	0	0	0	0	15.6502	0	13.9435	8.10222	0	6.47387	0	34.8699	0	0	0	0
tiRNA-1:34-Val-TAC-2	GGTTCCATAGTGTAGCGGTTATCACGTCTGCTTT	tiRNA-5	-	-	34	tRNA-Val-TAC-2-1,GGTTCCATAGTGTAGCGGTTATCACGTCTGCTTTACACGCAGAAGGTCCTGGGTTCGAGCCCCAGTGGAACCACCA,Val-TAC,0	0	0	0	0	0	0	0	0	0	0	35	32	0	0	0	0	0	0	0	0	0	0	153.24	62.5347
tRF-1:23-Val-TAC-1-M2	GGTTCCATAGTGTAGTGGTTATC	tRF-5b	5020b	tRF-23-R9JP9P9NDD	23	tRNA-Val-TAC-1-1,GGTTCCATAGTGTAGTGGTTATCACGTCTGCTTTACACGCAGAAGGTCCTGGGTTCGAGCCCCAGTGGAACCACCA,Val-TAC,0;tRNA-Val-TAC-3-1,GGTTCCATAGTGTAGTGGTTATCACATCTGCTTTACACGCAGAAGGTCCTGGGTTCAAGCCCCAGTGGAACCACCA,Val-TAC,0	6	20	18	13	2	2	4	8	13	26	2	4	23.4754	33.7997	50.1967	52.6644	13.4855	12.9477	12.5164	34.8699	37.033	168.699	8.75657	7.81684
tRF-1:30-Val-TAC-1	GGTTCCATAGTGTAGTGGTTATCACGTCTG	tRF-5c	-	tRF-30-R9JP9P9NH5SY	30	tRNA-Val-TAC-1-1,GGTTCCATAGTGTAGTGGTTATCACGTCTGCTTTACACGCAGAAGGTCCTGGGTTCGAGCCCCAGTGGAACCACCA,Val-TAC,0	6	7	15	0	0	0	0	3	4	0	0	7	23.4754	11.8299	41.8306	0	0	0	0	13.0762	11.3948	0	0	13.6795
tRF-1:31-Val-TAC-1	GGTTCCATAGTGTAGTGGTTATCACGTCTGC	tRF-5c	5020c	tRF-31-R9JP9P9NH5SYD	31	tRNA-Val-TAC-1-1,GGTTCCATAGTGTAGTGGTTATCACGTCTGCTTTACACGCAGAAGGTCCTGGGTTCGAGCCCCAGTGGAACCACCA,Val-TAC,0	8	36	7	3	0	0	0	1	7	0	0	0	31.3005	60.8394	19.521	12.1533	0	0	0	4.35874	19.9409	0	0	0
tRF-1:32-Val-TAC-1	GGTTCCATAGTGTAGTGGTTATCACGTCTGCT	tRF-5c	-	tRF-32-R9JP9P9NH5SY3	32	tRNA-Val-TAC-1-1,GGTTCCATAGTGTAGTGGTTATCACGTCTGCTTTACACGCAGAAGGTCCTGGGTTCGAGCCCCAGTGGAACCACCA,Val-TAC,0	3	18	4	0	0	2	0	1	6	0	0	0	11.7377	30.4197	11.1548	0	0	12.9477	0	4.35874	17.0922	0	0	0
tRF-1:15-Gln-CTG-1-M6	GGTTCCATGGTGTAA	tRF-5a	-	-	15	tRNA-Gln-CTG-1-1,GGTTCCATGGTGTAATGGTTAGCACTCTGGACTCTGAATCCAGCGATCCGAGTTCAAATCTCGGTGGAACCTCCA,Gln-CTG,0;tRNA-Gln-CTG-2-1,GGTTCCATGGTGTAATGGTTAGCACTCTGGACTCTGAATCCAGCGATCCGAGTTCAAGTCTCGGTGGAACCTCCA,Gln-CTG,0;tRNA-Gln-CTG-3-1,GGTTCCATGGTGTAATGGTGAGCACTCTGGACTCTGAATCCAGCGATCCGAGTTCGAGTCTCGGTGGAACCTCCA,Gln-CTG,0;tRNA-Gln-CTG-4-1,GGTTCCATGGTGTAATGGTAAGCACTCTGGACTCTGAATCCAGCGATCCGAGTTCGAGTCTCGGTGGAACCTC…	0	1	0	0	8	2	3	0	0	0	6	0	0	1.68998	0	0	53.9422	12.9477	9.38729	0	0	0	26.2697	0
tRF-1:29-Gln-CTG-4-M2	GGTTCCATGGTGTAATGGTAAGCACTCTG	tRF-5c	-	tRF-29-R9J89O9LF5JP	29	tRNA-Gln-CTG-4-1,GGTTCCATGGTGTAATGGTAAGCACTCTGGACTCTGAATCCAGCGATCCGAGTTCGAGTCTCGGTGGAACCTCCA,Gln-CTG,0;tRNA-Gln-CTG-7-1,GGTTCCATGGTGTAATGGTAAGCACTCTGGACTCTGAATCCAGCCATCTGAGTTCGAGTCTCTGTGGAACCTCCA,Gln-CTG,0	0	0	3	0	0	0	3	13	9	0	0	15	0	0	8.36612	0	0	0	9.38729	56.6636	25.6382	0	0	29.3131
tRF-1:29-Gln-CTG-3	GGTTCCATGGTGTAATGGTGAGCACTCTG	tRF-5c	-	tRF-29-R9J89O94F5JP	29	tRNA-Gln-CTG-3-1,GGTTCCATGGTGTAATGGTGAGCACTCTGGACTCTGAATCCAGCGATCCGAGTTCGAGTCTCGGTGGAACCTCCA,Gln-CTG,0	2	0	1	0	0	2	2	12	15	0	0	24	7.82512	0	2.78871	0	0	12.9477	6.25819	52.3049	42.7304	0	0	46.901
tRF-1:28-Gln-CTG-1-M3	GGTTCCATGGTGTAATGGTTAGCACTCT	tRF-5c	-	tRF-28-R9J89O9NF503	28	tRNA-Gln-CTG-1-1,GGTTCCATGGTGTAATGGTTAGCACTCTGGACTCTGAATCCAGCGATCCGAGTTCAAATCTCGGTGGAACCTCCA,Gln-CTG,0;tRNA-Gln-CTG-2-1,GGTTCCATGGTGTAATGGTTAGCACTCTGGACTCTGAATCCAGCGATCCGAGTTCAAGTCTCGGTGGAACCTCCA,Gln-CTG,0;tRNA-Gln-CTG-5-1,GGTTCCATGGTGTAATGGTTAGCACTCTGGACTCTGAATCCGGTAATCCGAGTTCAAATCTCGGTGGAACCTCCA,Gln-CTG,0	4	0	11	18	0	2	12	3	10	5	25	0	15.6502	0	30.6758	72.92	0	12.9477	37.5492	13.0762	28.4869	32.442	109.457	0
tRF-1:29-Gln-CTG-1-M3	GGTTCCATGGTGTAATGGTTAGCACTCTG	tRF-5c	-	tRF-29-R9J89O9NF5JP	29	tRNA-Gln-CTG-1-1,GGTTCCATGGTGTAATGGTTAGCACTCTGGACTCTGAATCCAGCGATCCGAGTTCAAATCTCGGTGGAACCTCCA,Gln-CTG,0;tRNA-Gln-CTG-2-1,GGTTCCATGGTGTAATGGTTAGCACTCTGGACTCTGAATCCAGCGATCCGAGTTCAAGTCTCGGTGGAACCTCCA,Gln-CTG,0;tRNA-Gln-CTG-5-1,GGTTCCATGGTGTAATGGTTAGCACTCTGGACTCTGAATCCGGTAATCCGAGTTCAAATCTCGGTGGAACCTCCA,Gln-CTG,0	877	13	1089	340	36	194	383	1672	1809	48	134	555	3431.32	21.9698	3036.9	1377.38	242.74	1255.93	1198.44	7287.82	5153.29	311.444	586.69	1084.59
tRF-1:30-Gln-CTG-1-M3	GGTTCCATGGTGTAATGGTTAGCACTCTGG	tRF-5c	-	tRF-30-R9J89O9NF5W8	30	tRNA-Gln-CTG-1-1,GGTTCCATGGTGTAATGGTTAGCACTCTGGACTCTGAATCCAGCGATCCGAGTTCAAATCTCGGTGGAACCTCCA,Gln-CTG,0;tRNA-Gln-CTG-2-1,GGTTCCATGGTGTAATGGTTAGCACTCTGGACTCTGAATCCAGCGATCCGAGTTCAAGTCTCGGTGGAACCTCCA,Gln-CTG,0;tRNA-Gln-CTG-5-1,GGTTCCATGGTGTAATGGTTAGCACTCTGGACTCTGAATCCGGTAATCCGAGTTCAAATCTCGGTGGAACCTCCA,Gln-CTG,0	4	2	0	2	0	0	0	14	19	0	18	0	15.6502	3.37997	0	8.10222	0	0	0	61.0224	54.1252	0	78.8091	0
tRF-1:31-Gln-CTG-1-M3	GGTTCCATGGTGTAATGGTTAGCACTCTGGA	tRF-5c	-	tRF-31-R9J89O9NF5W8B	31	tRNA-Gln-CTG-1-1,GGTTCCATGGTGTAATGGTTAGCACTCTGGACTCTGAATCCAGCGATCCGAGTTCAAATCTCGGTGGAACCTCCA,Gln-CTG,0;tRNA-Gln-CTG-2-1,GGTTCCATGGTGTAATGGTTAGCACTCTGGACTCTGAATCCAGCGATCCGAGTTCAAGTCTCGGTGGAACCTCCA,Gln-CTG,0;tRNA-Gln-CTG-5-1,GGTTCCATGGTGTAATGGTTAGCACTCTGGACTCTGAATCCGGTAATCCGAGTTCAAATCTCGGTGGAACCTCCA,Gln-CTG,0	0	0	0	0	0	0	0	0	0	0	43	0	0	0	0	0	0	0	0	0	0	0	188.266	0
tiRNA-1:34-Gln-CTG-1-M3	GGTTCCATGGTGTAATGGTTAGCACTCTGGACTC	tiRNA-5	-	tRF-34-R9J89O9NF5W8E5	34	tRNA-Gln-CTG-1-1,GGTTCCATGGTGTAATGGTTAGCACTCTGGACTCTGAATCCAGCGATCCGAGTTCAAATCTCGGTGGAACCTCCA,Gln-CTG,0;tRNA-Gln-CTG-2-1,GGTTCCATGGTGTAATGGTTAGCACTCTGGACTCTGAATCCAGCGATCCGAGTTCAAGTCTCGGTGGAACCTCCA,Gln-CTG,0;tRNA-Gln-CTG-5-1,GGTTCCATGGTGTAATGGTTAGCACTCTGGACTCTGAATCCGGTAATCCGAGTTCAAATCTCGGTGGAACCTCCA,Gln-CTG,0	0	0	0	0	0	0	0	0	0	0	124	0	0	0	0	0	0	0	0	0	0	0	542.907	0
tRF-52:72-chrM.Glu-TTC	GTAGTCCGTGCGAGAATACCA	tRF-3b	-	tRF-21-S334L2H1B	21	chrM.tRNA16-GluTTC,GTTCTTGTAGTTGAAATACAACGATGGTTTTTCATATCATTGGTCGTGGTTGTAGTCCGTGCGAGAATACCA,Glu-TTC,51	0	0	0	0	0	0	13	0	0	0	0	0	0	0	0	0	0	0	40.6783	0	0	0	0	0
tRF-1:14-Ser-AGA-1-M7	GTAGTCGTGGCCGA	tRF-5a	5022a	-	14	tRNA-Ser-AGA-1-1,GTAGTCGTGGCCGAGTGGTTAAGGCGATGGACTAGAAATCCATTGGGGTTTCCCCGCGCAGGTTCGAATCCTGCCGACTACGCCA,Ser-AGA,0;tRNA-Ser-AGA-2-1,GTAGTCGTGGCCGAGTGGTTAAGGCGATGGACTAGAAATCCATTGGGGTCTCCCCGCGCAGGTTCGAATCCTGCCGACTACGCCA,Ser-AGA,0;tRNA-Ser-AGA-3-1,GTAGTCGTGGCCGAGTGGTTAAGGCGATGGACTAGAAATCCATTGGGGTTTCCCCACGCAGGTTCGAATCCTGCCGACTACGCCA,Ser-AGA,0;tRNA-Ser-AGA-4-1,GTAGTCGTGGCCGAGTGGTTAAGGTGATGGACTAGAAACCCAT…	46	26	87	94	112	96	123	96	74	157	195	84	179.978	43.9396	242.618	380.804	755.19	621.492	384.879	418.439	210.803	1018.68	853.765	164.154
tRF-1:15-Ser-AGA-1-M7	GTAGTCGTGGCCGAG	tRF-5a	-	-	15	tRNA-Ser-AGA-1-1,GTAGTCGTGGCCGAGTGGTTAAGGCGATGGACTAGAAATCCATTGGGGTTTCCCCGCGCAGGTTCGAATCCTGCCGACTACGCCA,Ser-AGA,0;tRNA-Ser-AGA-2-1,GTAGTCGTGGCCGAGTGGTTAAGGCGATGGACTAGAAATCCATTGGGGTCTCCCCGCGCAGGTTCGAATCCTGCCGACTACGCCA,Ser-AGA,0;tRNA-Ser-AGA-3-1,GTAGTCGTGGCCGAGTGGTTAAGGCGATGGACTAGAAATCCATTGGGGTTTCCCCACGCAGGTTCGAATCCTGCCGACTACGCCA,Ser-AGA,0;tRNA-Ser-AGA-4-1,GTAGTCGTGGCCGAGTGGTTAAGGTGATGGACTAGAAACCCAT…	270	199	331	167	343	128	405	241	296	270	383	285	1056.39	336.307	923.062	676.535	2312.77	828.656	1267.28	1050.46	843.214	1751.87	1676.88	556.95
tRF-1:16-Ser-AGA-1-M7	GTAGTCGTGGCCGAGT	tRF-5a	-	tRF-16-S3M830E	16	tRNA-Ser-AGA-1-1,GTAGTCGTGGCCGAGTGGTTAAGGCGATGGACTAGAAATCCATTGGGGTTTCCCCGCGCAGGTTCGAATCCTGCCGACTACGCCA,Ser-AGA,0;tRNA-Ser-AGA-2-1,GTAGTCGTGGCCGAGTGGTTAAGGCGATGGACTAGAAATCCATTGGGGTCTCCCCGCGCAGGTTCGAATCCTGCCGACTACGCCA,Ser-AGA,0;tRNA-Ser-AGA-3-1,GTAGTCGTGGCCGAGTGGTTAAGGCGATGGACTAGAAATCCATTGGGGTTTCCCCACGCAGGTTCGAATCCTGCCGACTACGCCA,Ser-AGA,0;tRNA-Ser-AGA-4-1,GTAGTCGTGGCCGAGTGGTTAAGGTGATGGACTAGAAACCCAT…	43	104	194	92	131	97	68	33	40	42	10	0	168.24	175.758	541.009	372.702	883.303	627.966	212.779	143.838	113.948	272.513	43.7828	0
tRF-1:22-Ser-AGA-1-M7	GTAGTCGTGGCCGAGTGGTTAA	tRF-5b	-	tRF-22-S3M8309NF	22	tRNA-Ser-AGA-1-1,GTAGTCGTGGCCGAGTGGTTAAGGCGATGGACTAGAAATCCATTGGGGTTTCCCCGCGCAGGTTCGAATCCTGCCGACTACGCCA,Ser-AGA,0;tRNA-Ser-AGA-2-1,GTAGTCGTGGCCGAGTGGTTAAGGCGATGGACTAGAAATCCATTGGGGTCTCCCCGCGCAGGTTCGAATCCTGCCGACTACGCCA,Ser-AGA,0;tRNA-Ser-AGA-3-1,GTAGTCGTGGCCGAGTGGTTAAGGCGATGGACTAGAAATCCATTGGGGTTTCCCCACGCAGGTTCGAATCCTGCCGACTACGCCA,Ser-AGA,0;tRNA-Ser-AGA-4-1,GTAGTCGTGGCCGAGTGGTTAAGGTGATGGACTAGAAACCCAT…	8	8	56	15	55	0	34	67	8	0	53	1	31.3005	13.5199	156.168	60.7666	370.852	0	106.389	292.036	22.7896	0	232.049	1.95421
tRF-1:23-Ser-AGA-1-M7	GTAGTCGTGGCCGAGTGGTTAAG	tRF-5b	-	tRF-23-S3M8309NS	23	tRNA-Ser-AGA-1-1,GTAGTCGTGGCCGAGTGGTTAAGGCGATGGACTAGAAATCCATTGGGGTTTCCCCGCGCAGGTTCGAATCCTGCCGACTACGCCA,Ser-AGA,0;tRNA-Ser-AGA-2-1,GTAGTCGTGGCCGAGTGGTTAAGGCGATGGACTAGAAATCCATTGGGGTCTCCCCGCGCAGGTTCGAATCCTGCCGACTACGCCA,Ser-AGA,0;tRNA-Ser-AGA-3-1,GTAGTCGTGGCCGAGTGGTTAAGGCGATGGACTAGAAATCCATTGGGGTTTCCCCACGCAGGTTCGAATCCTGCCGACTACGCCA,Ser-AGA,0;tRNA-Ser-AGA-4-1,GTAGTCGTGGCCGAGTGGTTAAGGTGATGGACTAGAAACCCAT…	82	104	156	123	107	35	73	125	143	53	58	110	320.83	175.758	435.038	498.286	721.476	226.586	228.424	544.843	407.363	343.886	253.94	214.963
tRF-1:24-Ser-AGA-1-M7	GTAGTCGTGGCCGAGTGGTTAAGG	tRF-5b	-	tRF-24-S3M8309N0Y	24	tRNA-Ser-AGA-1-1,GTAGTCGTGGCCGAGTGGTTAAGGCGATGGACTAGAAATCCATTGGGGTTTCCCCGCGCAGGTTCGAATCCTGCCGACTACGCCA,Ser-AGA,0;tRNA-Ser-AGA-2-1,GTAGTCGTGGCCGAGTGGTTAAGGCGATGGACTAGAAATCCATTGGGGTCTCCCCGCGCAGGTTCGAATCCTGCCGACTACGCCA,Ser-AGA,0;tRNA-Ser-AGA-3-1,GTAGTCGTGGCCGAGTGGTTAAGGCGATGGACTAGAAATCCATTGGGGTTTCCCCACGCAGGTTCGAATCCTGCCGACTACGCCA,Ser-AGA,0;tRNA-Ser-AGA-4-1,GTAGTCGTGGCCGAGTGGTTAAGGTGATGGACTAGAAACCCAT…	75	12	85	93	100	57	8	75	94	41	107	42	293.442	20.2798	237.04	376.753	674.277	369.011	25.0328	326.906	267.777	266.025	468.476	82.0768
tRF-1:15-Ser-CGA-4	GTCACGGTGGCCGAG	tRF-5a	-	-	15	tRNA-Ser-CGA-4-1,GTCACGGTGGCCGAGTGGTTAAGGCGTTGGACTCGAAATCCAATGGGGTTTCCCCGCACAGGTTCGAATCCTGTTCGTGACGCCA,Ser-CGA,0	0	0	0	1	0	0	0	0	0	32	0	0	0	0	0	4.05111	0	0	0	0	0	207.629	0	0
tRF-58:75-Trp-CCA-2	GTCACGTCGGGGTCACCA	tRF-3a	-	tRF-18-S5S8R6D2	18	tRNA-Trp-CCA-2-1,GACCTCGTGGCGCAATGGTAGCGCGTCTGACTCCAGATCAGAAGGTTGCGTGTTCAAGTCACGTCGGGGTCACCA,Trp-CCA,57	6	20	43	10	33	15	10	40	18	112	67	0	23.4754	33.7997	119.914	40.5111	222.511	97.1081	31.291	174.35	51.2765	726.702	293.345	0
tRF-1:14-Leu-CAA-1-M7	GTCAGGATGGCCGA	tRF-5a	-	-	14	tRNA-Leu-CAA-1-1,GTCAGGATGGCCGAGTGGTCTAAGGCGCCAGACTCAAGTTCTGGTCTCCAATGGAGGCGTGGGTTCGAATCCCACTTCTGACACCA,Leu-CAA,0;tRNA-Leu-CAA-2-1,GTCAGGATGGCCGAGTGGTCTAAGGCGCCAGACTCAAGTTCTGGTCTCCGTATGGAGGCGTGGGTTCGAATCCCACTTCTGACACCA,Leu-CAA,0;tRNA-Leu-CAA-3-1,GTCAGGATGGCCGAGTGGTCTAAGGCGCCAGACTCAAGTTCTGGTCTCCGCATGGAGGCGTGGGTTCGAATCCCACTTCTGACACCA,Leu-CAA,0;tRNA-Leu-CAA-4-1,GTCAGGATGGCCGAGTGGTCTAAGGCGCCAGACTCAAG…	0	0	0	0	0	20	0	0	0	42	0	0	0	0	0	0	0	129.477	0	0	0	272.513	0	0
tRF-1:15-Leu-CAA-1-M7	GTCAGGATGGCCGAG	tRF-5a	-	-	15	tRNA-Leu-CAA-1-1,GTCAGGATGGCCGAGTGGTCTAAGGCGCCAGACTCAAGTTCTGGTCTCCAATGGAGGCGTGGGTTCGAATCCCACTTCTGACACCA,Leu-CAA,0;tRNA-Leu-CAA-2-1,GTCAGGATGGCCGAGTGGTCTAAGGCGCCAGACTCAAGTTCTGGTCTCCGTATGGAGGCGTGGGTTCGAATCCCACTTCTGACACCA,Leu-CAA,0;tRNA-Leu-CAA-3-1,GTCAGGATGGCCGAGTGGTCTAAGGCGCCAGACTCAAGTTCTGGTCTCCGCATGGAGGCGTGGGTTCGAATCCCACTTCTGACACCA,Leu-CAA,0;tRNA-Leu-CAA-4-1,GTCAGGATGGCCGAGTGGTCTAAGGCGCCAGACTCAAG…	8	3	2	0	30	15	0	13	1	1	50	0	31.3005	5.06995	5.57742	0	202.283	97.1081	0	56.6636	2.84869	6.48841	218.914	0
tRF-1:16-Leu-CAA-6-M3	GTCAGGATGGCCGAGC	tRF-5a	5023a	tRF-16-SP5830D	16	tRNA-Leu-CAA-6-1,GTCAGGATGGCCGAGCAGTCTTAAGGCGCTGCGTTCAAATCGCACCCTCCGCTGGAGGCGTGGGTTCGAATCCCACTTTTGACACCA,Leu-CAA,0;tRNA-Leu-CAG-1-1,GTCAGGATGGCCGAGCGGTCTAAGGCGCTGCGTTCAGGTCGCAGTCTCCCCTGGAGGCGTGGGTTCGAATCCCACTCCTGACACCA,Leu-CAG,0;tRNA-Leu-CAG-2-1,GTCAGGATGGCCGAGCGGTCTAAGGCGCTGCGTTCAGGTCGCAGTCTCCCCTGGAGGCGTGGGTTCGAATCCCACTTCTGACACCA,Leu-CAG,0	12	94	33	26	185	24	14	58	16	402	94	178	46.9507	158.858	92.0274	105.329	1247.41	155.373	43.8074	252.807	45.5791	2608.34	411.559	347.849
tRF-1:24-Leu-CAG-1-M2	GTCAGGATGGCCGAGCGGTCTAAG	tRF-5b	-	tRF-24-SP5830MM2S	24	tRNA-Leu-CAG-1-1,GTCAGGATGGCCGAGCGGTCTAAGGCGCTGCGTTCAGGTCGCAGTCTCCCCTGGAGGCGTGGGTTCGAATCCCACTCCTGACACCA,Leu-CAG,0;tRNA-Leu-CAG-2-1,GTCAGGATGGCCGAGCGGTCTAAGGCGCTGCGTTCAGGTCGCAGTCTCCCCTGGAGGCGTGGGTTCGAATCCCACTTCTGACACCA,Leu-CAG,0	4	0	4	0	0	0	0	18	0	0	38	0	15.6502	0	11.1548	0	0	0	0	78.4574	0	0	166.375	0
tRF-1:31-Leu-CAG-1-M2	GTCAGGATGGCCGAGCGGTCTAAGGCGCTGC	tRF-5c	-	-	31	tRNA-Leu-CAG-1-1,GTCAGGATGGCCGAGCGGTCTAAGGCGCTGCGTTCAGGTCGCAGTCTCCCCTGGAGGCGTGGGTTCGAATCCCACTCCTGACACCA,Leu-CAG,0;tRNA-Leu-CAG-2-1,GTCAGGATGGCCGAGCGGTCTAAGGCGCTGCGTTCAGGTCGCAGTCTCCCCTGGAGGCGTGGGTTCGAATCCCACTTCTGACACCA,Leu-CAG,0	0	0	0	0	0	0	0	0	0	0	33	0	0	0	0	0	0	0	0	0	0	0	144.483	0
tiRNA-1:35-Leu-CAG-1-M2	GTCAGGATGGCCGAGCGGTCTAAGGCGCTGCGTTC	tiRNA-5	-	tRF-35-SP5830MMUKLYM9	35	tRNA-Leu-CAG-1-1,GTCAGGATGGCCGAGCGGTCTAAGGCGCTGCGTTCAGGTCGCAGTCTCCCCTGGAGGCGTGGGTTCGAATCCCACTCCTGACACCA,Leu-CAG,0;tRNA-Leu-CAG-2-1,GTCAGGATGGCCGAGCGGTCTAAGGCGCTGCGTTCAGGTCGCAGTCTCCCCTGGAGGCGTGGGTTCGAATCCCACTTCTGACACCA,Leu-CAG,0	1	0	1	0	0	0	0	1	0	0	134	1	3.91256	0	2.78871	0	0	0	0	4.35874	0	0	586.69	1.95421
tRF-1:16-Leu-CAA-1-M4	GTCAGGATGGCCGAGT	tRF-5a	-	-	16	tRNA-Leu-CAA-1-1,GTCAGGATGGCCGAGTGGTCTAAGGCGCCAGACTCAAGTTCTGGTCTCCAATGGAGGCGTGGGTTCGAATCCCACTTCTGACACCA,Leu-CAA,0;tRNA-Leu-CAA-2-1,GTCAGGATGGCCGAGTGGTCTAAGGCGCCAGACTCAAGTTCTGGTCTCCGTATGGAGGCGTGGGTTCGAATCCCACTTCTGACACCA,Leu-CAA,0;tRNA-Leu-CAA-3-1,GTCAGGATGGCCGAGTGGTCTAAGGCGCCAGACTCAAGTTCTGGTCTCCGCATGGAGGCGTGGGTTCGAATCCCACTTCTGACACCA,Leu-CAA,0;tRNA-Leu-CAA-4-1,GTCAGGATGGCCGAGTGGTCTAAGGCGCCAGACTCAAG…	6	37	44	38	100	13	5	10	4	94	18	40	23.4754	62.5294	122.703	153.942	674.277	84.1604	15.6455	43.5874	11.3948	609.91	78.8091	78.1684
tRF-+1:T14-Asn-GTT-2-4	GTCAGTGCTTCTTT	tRF-1	-	-	14	pre_tRNA-Asn-GTT-2-4,CGGAAATCTGTACACACCGCAGCGCGGCCTGAGTAACTGGGTCTCTGTGGCGCAATCGGTTAGCGCGTTCGGCTGTTAACCGAAAGGTTGGTGGTTCGAGCCCACCCAGGGACGGTCAGTGCTTCTTTTCCCGAGACAACATTTACCCGATGGT,Asn-GTT,114	3	0	26	1	0	0	0	0	0	0	0	0	11.7377	0	72.5064	4.05111	0	0	0	0	0	0	0	0
tRF-59:76-chrM.Asn-GTT	GTCCCATTGGTCTAGCCA	tRF-3a	-	tRF-18-SRI8WPD2	18	chrM.tRNA20-AsnGTT,TAGATTGAAGCCAGTTGATTAGGGTGCTTAGCTGTTAACTAAGTGTTTGTGGGTTTAAGTCCCATTGGTCTAGCCA,Asn-GTT,58	0	0	0	0	0	0	18	0	0	0	0	0	0	0	0	0	0	0	56.3237	0	0	0	0	0
tRF-1:14-chrM.Thr-TGT	GTCCTTGTAGTATA	tRF-5a	-	-	14	chrM.tRNA14-ThrTGT,GTCCTTGTAGTATAAACTAATACACCAGTCTTGTAAACCGGAGACGAAAACCTTTTTCCAAGGACACCA,Thr-TGT,0	0	0	0	10	0	0	0	0	0	0	0	0	0	0	0	40.5111	0	0	0	0	0	0	0	0
tRF-1:24-chrM.Thr-TGT	GTCCTTGTAGTATAAACTAATACA	tRF-5b	-	-	24	chrM.tRNA14-ThrTGT,GTCCTTGTAGTATAAACTAATACACCAGTCTTGTAAACCGGAGACGAAAACCTTTTTCCAAGGACACCA,Thr-TGT,0	0	0	0	0	0	0	0	1	21	0	0	0	0	0	0	0	0	0	0	4.35874	59.8226	0	0	0
tRF-30:43-Met-CAT-1-M6	GTCTCATAATCTGA	tRF-2	-	-	14	tRNA-Met-CAT-1-1,GCCTCGTTAGCGCAGTAGGTAGCGCGTCAGTCTCATAATCTGAAGGTCGTGAGTTCGATCCTCACACGGGGCACCA,Met-CAT,29;tRNA-Met-CAT-2-1,GCCCTCTTAGCGCAGTGGGCAGCGCGTCAGTCTCATAATCTGAAGGTCCTGAGTTCGAGCCTCAGAGAGGGCACCA,Met-CAT,29;tRNA-Met-CAT-3-1,GCCTCCTTAGCGCAGTAGGCAGCGCGTCAGTCTCATAATCTGAAGGTCCTGAGTTCGAACCTCAGAGGGGGCACCA,Met-CAT,29;tRNA-Met-CAT-4-1,GCCCTCTTAGCGCAGCGGGCAGCGCGTCAGTCTCATAATCTGAAGGTCCTGAGTTCGAGCCTCAGAG…	0	0	0	0	0	0	0	0	0	0	0	12	0	0	0	0	0	0	0	0	0	0	0	23.4505
tRF-58:75-Gln-CTG-2-M3	GTCTCGGTGGAACCTCCA	tRF-3a	-	tRF-18-S9R8B7D2	18	tRNA-Gln-CTG-2-1,GGTTCCATGGTGTAATGGTTAGCACTCTGGACTCTGAATCCAGCGATCCGAGTTCAAGTCTCGGTGGAACCTCCA,Gln-CTG,57;tRNA-Gln-CTG-3-1,GGTTCCATGGTGTAATGGTGAGCACTCTGGACTCTGAATCCAGCGATCCGAGTTCGAGTCTCGGTGGAACCTCCA,Gln-CTG,57;tRNA-Gln-CTG-4-1,GGTTCCATGGTGTAATGGTAAGCACTCTGGACTCTGAATCCAGCGATCCGAGTTCGAGTCTCGGTGGAACCTCCA,Gln-CTG,57	20	20	54	58	22	58	123	27	68	9	52	6	78.2512	33.7997	150.59	234.964	148.341	375.485	384.879	117.686	193.711	58.3957	227.671	11.7253
tRF-1:23-Arg-TCT-4	GTCTCTGTGGCGCAATGGACGAG	tRF-5b	-	-	23	tRNA-Arg-TCT-4-1,GTCTCTGTGGCGCAATGGACGAGCGCGCTGGACTTCTAATCCAGAGGTTCCGGGTTCGAGTCCCGGCAGAGATGCCA,Arg-TCT,0	0	0	0	0	0	0	0	25	0	0	0	0	0	0	0	0	0	0	0	108.969	0	0	0	0
tRF-+1:T20-Arg-ACG-1-2	GTGTAAGCAGGGTCGTTTTA	tRF-1	-	-	20	pre_tRNA-Arg-ACG-1-2,CTAGTTTCTTATGAAATACCTCGCCCCTAAGGTACGCGCAGGGCCAGTGGCGCAATGGATAACGCGTCTGACTACGGATCAGAAGATTCCAGGTTCGACTCCTGGCTGGCTCGGTGTAAGCAGGGTCGTTTTACAACTTTCTGACTCCGCAGG,Arg-ACG,113	6	0	0	0	0	0	0	0	0	0	0	0	23.4754	0	0	0	0	0	0	0	0	0	0	0
tRF-+1:T25-Gly-TCC-2	GTGTCAGTTTTTCTCTTCAGCTTTT	tRF-1	-	-	25	pre_tRNA-Gly-TCC-2-1,TTAGTTCTGATACTCTAAAGGAATCAAGTGTATTTCAGATGCGTTGGTGGTATAGTGGTGAGCATAGCTGCCTTCCAAGCAGTTGACCCGGGTTCGATTCCCGGCCAACGCAGTGTCAGTTTTTCTCTTCAGCTTTTTAGACTGAGTAGGCC,Gly-TCC,112	7	0	1	0	0	0	0	0	0	0	0	0	27.3879	0	2.78871	0	0	0	0	0	0	0	0	0
tRF-1:16-chrM.Leu-TAA	GTTAAGATGGCAGAGC	tRF-5a	-	tRF-16-7O58J0D	16	chrM.tRNA3-LeuTAA,GTTAAGATGGCAGAGCCCGGTAATCGCATAAAACTTAAAACTTTACAGTCAGAGGTTCAATTCCTCTTCTTAACACCA,Leu-TAA,0	0	0	0	0	0	0	0	0	0	0	0	25	0	0	0	0	0	0	0	0	0	0	0	48.8552
tRF-48:69-chrM.Tyr-GTA	GTTAGGCCTCTTTTTACCACCA	tRF-3b	-	tRF-22-7PP9ZZ052	22	chrM.tRNA18-TyrGTA,GGTAAAATGGCTGAGTGAAGCATTGGACTGTAAATCTAAAGACAGGGGTTAGGCCTCTTTTTACCACCA,Tyr-GTA,47	0	2	5	0	0	0	0	0	12	0	0	0	0	3.37997	13.9435	0	0	0	0	0	34.1843	0	0	0
tRF-52:72-Pro-AGG-1-M7-20:C>A	GTTCAAATCCCGGACGAGCCA	tRF-3b	-	-	21	tRNA-Pro-AGG-1-1,GGCTCGTTGGTCTAGGGGTATGATTCTCGCTTAGGATGCGAGAGGTCCCGGGTTCAAATCCCGGACGAGCCCCCA,Pro-AGG,51;tRNA-Pro-AGG-2-1,GGCTCGTTGGTCTAGGGGTATGATTCTCGCTTAGGGTGCGAGAGGTCCCGGGTTCAAATCCCGGACGAGCCCCCA,Pro-AGG,51;tRNA-Pro-CGG-1-1,GGCTCGTTGGTCTAGGGGTATGATTCTCGCTTCGGGTGCGAGAGGTCCCGGGTTCAAATCCCGGACGAGCCCCCA,Pro-CGG,51;tRNA-Pro-CGG-2-1,GGCTCGTTGGTCTAGGGGTATGATTCTCGCTTCGGGTGTGAGAGGTCCCGGGTTCAAATCCCGGACGAGC…	0	0	0	0	6	0	0	0	0	0	0	0	0	0	0	0	40.4566	0	0	0	0	0	0	0
tRF-1:23-Val-CAC-6	GTTTCCGTAGTGGAGTGGTTATC	tRF-5b	-	-	23	tRNA-Val-CAC-6-1,GTTTCCGTAGTGGAGTGGTTATCACGTTCGCCTCACACGCGAAAGGTCCCCGGTTTGAAACCAGGCGGAAACACCA,Val-CAC,0	6	6	6	8	2	2	6	4	8	1	4	2	23.4754	10.1399	16.7322	32.4089	13.4855	12.9477	18.7746	17.435	22.7896	6.48841	17.5131	3.90842
tRF-1:30-Val-CAC-6	GTTTCCGTAGTGGAGTGGTTATCACGTTCG	tRF-5c	-	tRF-30-79MP909NH57S	30	tRNA-Val-CAC-6-1,GTTTCCGTAGTGGAGTGGTTATCACGTTCGCCTCACACGCGAAAGGTCCCCGGTTTGAAACCAGGCGGAAACACCA,Val-CAC,0	0	0	0	0	0	0	0	0	0	0	30	0	0	0	0	0	0	0	0	0	0	0	131.349	0
tRF-1:14-Val-AAC-1-M9	GTTTCCGTAGTGTA	tRF-5a	-	-	14	tRNA-Val-AAC-1-1,GTTTCCGTAGTGTAGTGGTTATCACGTTCGCCTAACACGCGAAAGGTCCCCGGTTCGAAACCGGGCGGAAACACCA,Val-AAC,0;tRNA-Val-AAC-2-1,GTTTCCGTAGTGTAGTGGTCATCACGTTCGCCTAACACGCGAAAGGTCCCCGGTTCGAAACCGGGCGGAAACACCA,Val-AAC,0;tRNA-Val-AAC-3-1,GTTTCCGTAGTGTAGTGGTTATCACGTTCGCCTAACACGCGAAAGGTCCCTGGATCAAAACCAGGCGGAAACACCA,Val-AAC,0;tRNA-Val-AAC-4-1,GTTTCCGTAGTGTAGTGGTTATCACGTTCGCCTAACACGCGAAAGGTCCGCGGTTCGAAACCGGGCGGAA…	10	5	20	14	0	9	45	10	30	0	9	18	39.1256	8.44991	55.7742	56.7155	0	58.2649	140.809	43.5874	85.4608	0	39.4046	35.1758
tRF-1:15-Val-AAC-1-M9	GTTTCCGTAGTGTAG	tRF-5a	-	-	15	tRNA-Val-AAC-1-1,GTTTCCGTAGTGTAGTGGTTATCACGTTCGCCTAACACGCGAAAGGTCCCCGGTTCGAAACCGGGCGGAAACACCA,Val-AAC,0;tRNA-Val-AAC-2-1,GTTTCCGTAGTGTAGTGGTCATCACGTTCGCCTAACACGCGAAAGGTCCCCGGTTCGAAACCGGGCGGAAACACCA,Val-AAC,0;tRNA-Val-AAC-3-1,GTTTCCGTAGTGTAGTGGTTATCACGTTCGCCTAACACGCGAAAGGTCCCTGGATCAAAACCAGGCGGAAACACCA,Val-AAC,0;tRNA-Val-AAC-4-1,GTTTCCGTAGTGTAGTGGTTATCACGTTCGCCTAACACGCGAAAGGTCCGCGGTTCGAAACCGGGCGGAA…	166	134	412	154	324	300	270	206	190	196	350	273	649.485	226.458	1148.95	623.871	2184.66	1942.16	844.856	897.901	541.252	1271.73	1532.4	533.499
tRF-1:16-Val-CAC-3	GTTTCCGTAGTGTAGC	tRF-5a	-	tRF-16-79MP9PD	16	tRNA-Val-CAC-3-1,GTTTCCGTAGTGTAGCGGTTATCACATTCGCCTCACACGCGAAAGGTCCCCGGTTCGATCCCGGGCGGAAACACCA,Val-CAC,0	0	1	14	6	9	12	0	0	1	14	1	1	0	1.68998	39.0419	24.3067	60.6849	77.6865	0	0	2.84869	90.8377	4.37828	1.95421
tRF-1:23-Val-CAC-3	GTTTCCGTAGTGTAGCGGTTATC	tRF-5b	-	tRF-23-79MP9PMNDD	23	tRNA-Val-CAC-3-1,GTTTCCGTAGTGTAGCGGTTATCACATTCGCCTCACACGCGAAAGGTCCCCGGTTCGATCCCGGGCGGAAACACCA,Val-CAC,0	8	22	14	14	2	4	12	8	13	4	4	36	31.3005	37.1796	39.0419	56.7155	13.4855	25.8955	37.5492	34.8699	37.033	25.9536	17.5131	70.3515
tRF-1:32-Val-CAC-3	GTTTCCGTAGTGTAGCGGTTATCACATTCGCC	tRF-5c	-	tRF-32-79MP9PMNH5ISJ	32	tRNA-Val-CAC-3-1,GTTTCCGTAGTGTAGCGGTTATCACATTCGCCTCACACGCGAAAGGTCCCCGGTTCGATCCCGGGCGGAAACACCA,Val-CAC,0	3	18	4	3	0	3	2	1	9	0	14	40	11.7377	30.4197	11.1548	12.1533	0	19.4216	6.25819	4.35874	25.6382	0	61.296	78.1684
tRF-1:16-Val-AAC-1-M8	GTTTCCGTAGTGTAGT	tRF-5a	-	tRF-16-79MP9PE	16	tRNA-Val-AAC-1-1,GTTTCCGTAGTGTAGTGGTTATCACGTTCGCCTAACACGCGAAAGGTCCCCGGTTCGAAACCGGGCGGAAACACCA,Val-AAC,0;tRNA-Val-AAC-2-1,GTTTCCGTAGTGTAGTGGTCATCACGTTCGCCTAACACGCGAAAGGTCCCCGGTTCGAAACCGGGCGGAAACACCA,Val-AAC,0;tRNA-Val-AAC-3-1,GTTTCCGTAGTGTAGTGGTTATCACGTTCGCCTAACACGCGAAAGGTCCCTGGATCAAAACCAGGCGGAAACACCA,Val-AAC,0;tRNA-Val-AAC-4-1,GTTTCCGTAGTGTAGTGGTTATCACGTTCGCCTAACACGCGAAAGGTCCGCGGTTCGAAACCGGGCGGAA…	4	34	44	36	53	8	2	8	1	219	39	3	15.6502	57.4594	122.703	145.84	357.367	51.791	6.25819	34.8699	2.84869	1420.96	170.753	5.86263
tRF-1:22-Val-AAC-2	GTTTCCGTAGTGTAGTGGTCAT	tRF-5b	-	tRF-22-79MP9P9MI	22	tRNA-Val-AAC-2-1,GTTTCCGTAGTGTAGTGGTCATCACGTTCGCCTAACACGCGAAAGGTCCCCGGTTCGAAACCGGGCGGAAACACCA,Val-AAC,0	17	13	17	6	0	1	1	1	0	1	0	0	66.5136	21.9698	47.408	24.3067	0	6.47387	3.1291	4.35874	0	6.48841	0	0
tRF-1:23-Val-AAC-2	GTTTCCGTAGTGTAGTGGTCATC	tRF-5b	5026b	tRF-23-79MP9P9MDD	23	tRNA-Val-AAC-2-1,GTTTCCGTAGTGTAGTGGTCATCACGTTCGCCTAACACGCGAAAGGTCCCCGGTTCGAAACCGGGCGGAAACACCA,Val-AAC,0	190	118	246	141	140	104	200	182	220	56	217	62	743.387	199.418	686.022	571.206	943.988	673.283	625.819	793.291	626.713	363.351	950.088	121.161
tRF-1:24-Val-AAC-2	GTTTCCGTAGTGTAGTGGTCATCA	tRF-5b	-	tRF-24-79MP9P9MF2	24	tRNA-Val-AAC-2-1,GTTTCCGTAGTGTAGTGGTCATCACGTTCGCCTAACACGCGAAAGGTCCCCGGTTCGAAACCGGGCGGAAACACCA,Val-AAC,0	7	9	10	0	0	1	0	0	4	0	0	1	27.3879	15.2098	27.8871	0	0	6.47387	0	0	11.3948	0	0	1.95421
tRF-1:29-Val-AAC-2	GTTTCCGTAGTGTAGTGGTCATCACGTTC	tRF-5c	-	tRF-29-79MP9P9MH525	29	tRNA-Val-AAC-2-1,GTTTCCGTAGTGTAGTGGTCATCACGTTCGCCTAACACGCGAAAGGTCCCCGGTTCGAAACCGGGCGGAAACACCA,Val-AAC,0	25	6	30	8	10	11	27	20	54	5	2	28	97.8141	10.1399	83.6612	32.4089	67.4277	71.2126	84.4856	87.1748	153.829	32.442	8.75657	54.7179
tRF-1:32-Val-AAC-2	GTTTCCGTAGTGTAGTGGTCATCACGTTCGCC	tRF-5c	-	tRF-32-79MP9P9MH57SJ	32	tRNA-Val-AAC-2-1,GTTTCCGTAGTGTAGTGGTCATCACGTTCGCCTAACACGCGAAAGGTCCCCGGTTCGAAACCGGGCGGAAACACCA,Val-AAC,0	8	19	9	5	3	4	4	3	4	2	0	33	31.3005	32.1097	25.0984	20.2555	20.2283	25.8955	12.5164	13.0762	11.3948	12.9768	0	64.4889
tRF-1:22-Val-AAC-1-M7	GTTTCCGTAGTGTAGTGGTTAT	tRF-5b	-	tRF-22-79MP9P9NI	22	tRNA-Val-AAC-1-1,GTTTCCGTAGTGTAGTGGTTATCACGTTCGCCTAACACGCGAAAGGTCCCCGGTTCGAAACCGGGCGGAAACACCA,Val-AAC,0;tRNA-Val-AAC-3-1,GTTTCCGTAGTGTAGTGGTTATCACGTTCGCCTAACACGCGAAAGGTCCCTGGATCAAAACCAGGCGGAAACACCA,Val-AAC,0;tRNA-Val-AAC-4-1,GTTTCCGTAGTGTAGTGGTTATCACGTTCGCCTAACACGCGAAAGGTCCGCGGTTCGAAACCGGGCGGAAACACCA,Val-AAC,0;tRNA-Val-AAC-5-1,GTTTCCGTAGTGTAGTGGTTATCACGTTTGCCTAACACGCGAAAGGTCCCCGGTTCGAAACCGGGCAGAA…	8	8	19	12	78	1	2	2	19	0	2	2	31.3005	13.5199	52.9855	48.6133	525.936	6.47387	6.25819	8.71748	54.1252	0	8.75657	3.90842
tRF-1:23-Val-AAC-1-M7	GTTTCCGTAGTGTAGTGGTTATC	tRF-5b	5027b	tRF-23-79MP9P9NDD	23	tRNA-Val-AAC-1-1,GTTTCCGTAGTGTAGTGGTTATCACGTTCGCCTAACACGCGAAAGGTCCCCGGTTCGAAACCGGGCGGAAACACCA,Val-AAC,0;tRNA-Val-AAC-3-1,GTTTCCGTAGTGTAGTGGTTATCACGTTCGCCTAACACGCGAAAGGTCCCTGGATCAAAACCAGGCGGAAACACCA,Val-AAC,0;tRNA-Val-AAC-4-1,GTTTCCGTAGTGTAGTGGTTATCACGTTCGCCTAACACGCGAAAGGTCCGCGGTTCGAAACCGGGCGGAAACACCA,Val-AAC,0;tRNA-Val-AAC-5-1,GTTTCCGTAGTGTAGTGGTTATCACGTTTGCCTAACACGCGAAAGGTCCCCGGTTCGAAACCGGGCAGAA…	2580	4124	4478	2164	644	1654	1964	2054	2768	958	1365	1398	10094.4	6969.49	12487.8	8766.6	4342.34	10707.8	6145.55	8952.86	7885.19	6215.9	5976.36	2731.98
tRF-1:24-Val-AAC-1-M7	GTTTCCGTAGTGTAGTGGTTATCA	tRF-5b	-	tRF-24-79MP9P9NF2	24	tRNA-Val-AAC-1-1,GTTTCCGTAGTGTAGTGGTTATCACGTTCGCCTAACACGCGAAAGGTCCCCGGTTCGAAACCGGGCGGAAACACCA,Val-AAC,0;tRNA-Val-AAC-3-1,GTTTCCGTAGTGTAGTGGTTATCACGTTCGCCTAACACGCGAAAGGTCCCTGGATCAAAACCAGGCGGAAACACCA,Val-AAC,0;tRNA-Val-AAC-4-1,GTTTCCGTAGTGTAGTGGTTATCACGTTCGCCTAACACGCGAAAGGTCCGCGGTTCGAAACCGGGCGGAAACACCA,Val-AAC,0;tRNA-Val-AAC-5-1,GTTTCCGTAGTGTAGTGGTTATCACGTTTGCCTAACACGCGAAAGGTCCCCGGTTCGAAACCGGGCAGAA…	30	68	120	30	5	7	62	74	74	0	2	46	117.377	114.919	334.645	121.533	33.7139	45.3171	194.004	322.547	210.803	0	8.75657	89.8936
tRF-1:28-Val-AAC-1-M7	GTTTCCGTAGTGTAGTGGTTATCACGTT	tRF-5c	-	tRF-28-79MP9P9NH50E	28	tRNA-Val-AAC-1-1,GTTTCCGTAGTGTAGTGGTTATCACGTTCGCCTAACACGCGAAAGGTCCCCGGTTCGAAACCGGGCGGAAACACCA,Val-AAC,0;tRNA-Val-AAC-3-1,GTTTCCGTAGTGTAGTGGTTATCACGTTCGCCTAACACGCGAAAGGTCCCTGGATCAAAACCAGGCGGAAACACCA,Val-AAC,0;tRNA-Val-AAC-4-1,GTTTCCGTAGTGTAGTGGTTATCACGTTCGCCTAACACGCGAAAGGTCCGCGGTTCGAAACCGGGCGGAAACACCA,Val-AAC,0;tRNA-Val-AAC-5-1,GTTTCCGTAGTGTAGTGGTTATCACGTTTGCCTAACACGCGAAAGGTCCCCGGTTCGAAACCGGGCAGAA…	8	4	2	2	0	1	5	2	9	0	1	0	31.3005	6.75993	5.57742	8.10222	0	6.47387	15.6455	8.71748	25.6382	0	4.37828	0
tRF-1:29-Val-AAC-1-M6	GTTTCCGTAGTGTAGTGGTTATCACGTTC	tRF-5c	-	tRF-29-79MP9P9NH525	29	tRNA-Val-AAC-1-1,GTTTCCGTAGTGTAGTGGTTATCACGTTCGCCTAACACGCGAAAGGTCCCCGGTTCGAAACCGGGCGGAAACACCA,Val-AAC,0;tRNA-Val-AAC-3-1,GTTTCCGTAGTGTAGTGGTTATCACGTTCGCCTAACACGCGAAAGGTCCCTGGATCAAAACCAGGCGGAAACACCA,Val-AAC,0;tRNA-Val-AAC-4-1,GTTTCCGTAGTGTAGTGGTTATCACGTTCGCCTAACACGCGAAAGGTCCGCGGTTCGAAACCGGGCGGAAACACCA,Val-AAC,0;tRNA-Val-CAC-1-1,GTTTCCGTAGTGTAGTGGTTATCACGTTCGCCTCACACGCGAAAGGTCCCCGGTTCGAAACCGGGCGGAA…	364	123	382	102	1	62	114	263	310	8	90	104	1424.17	207.868	1065.29	413.213	6.74277	401.38	356.717	1146.35	883.095	51.9073	394.046	203.238
tRF-1:30-Val-AAC-1-M6	GTTTCCGTAGTGTAGTGGTTATCACGTTCG	tRF-5c	-	tRF-30-79MP9P9NH57S	30	tRNA-Val-AAC-1-1,GTTTCCGTAGTGTAGTGGTTATCACGTTCGCCTAACACGCGAAAGGTCCCCGGTTCGAAACCGGGCGGAAACACCA,Val-AAC,0;tRNA-Val-AAC-3-1,GTTTCCGTAGTGTAGTGGTTATCACGTTCGCCTAACACGCGAAAGGTCCCTGGATCAAAACCAGGCGGAAACACCA,Val-AAC,0;tRNA-Val-AAC-4-1,GTTTCCGTAGTGTAGTGGTTATCACGTTCGCCTAACACGCGAAAGGTCCGCGGTTCGAAACCGGGCGGAAACACCA,Val-AAC,0;tRNA-Val-CAC-1-1,GTTTCCGTAGTGTAGTGGTTATCACGTTCGCCTCACACGCGAAAGGTCCCCGGTTCGAAACCGGGCGGAA…	1	20	8	2	0	1	0	1	3	2	30	0	3.91256	33.7997	22.3097	8.10222	0	6.47387	0	4.35874	8.54608	12.9768	131.349	0
tRF-1:31-Val-AAC-1-M6	GTTTCCGTAGTGTAGTGGTTATCACGTTCGC	tRF-5c	5027c	tRF-31-79MP9P9NH57SD	31	tRNA-Val-AAC-1-1,GTTTCCGTAGTGTAGTGGTTATCACGTTCGCCTAACACGCGAAAGGTCCCCGGTTCGAAACCGGGCGGAAACACCA,Val-AAC,0;tRNA-Val-AAC-3-1,GTTTCCGTAGTGTAGTGGTTATCACGTTCGCCTAACACGCGAAAGGTCCCTGGATCAAAACCAGGCGGAAACACCA,Val-AAC,0;tRNA-Val-AAC-4-1,GTTTCCGTAGTGTAGTGGTTATCACGTTCGCCTAACACGCGAAAGGTCCGCGGTTCGAAACCGGGCGGAAACACCA,Val-AAC,0;tRNA-Val-CAC-1-1,GTTTCCGTAGTGTAGTGGTTATCACGTTCGCCTCACACGCGAAAGGTCCCCGGTTCGAAACCGGGCGGAA…	47	293	79	25	22	16	37	24	92	5	86	103	183.89	495.165	220.308	101.278	148.341	103.582	115.777	104.61	262.08	32.442	376.532	201.284
tRF-1:32-Val-AAC-1-M6	GTTTCCGTAGTGTAGTGGTTATCACGTTCGCC	tRF-5c	-	tRF-32-79MP9P9NH57SJ	32	tRNA-Val-AAC-1-1,GTTTCCGTAGTGTAGTGGTTATCACGTTCGCCTAACACGCGAAAGGTCCCCGGTTCGAAACCGGGCGGAAACACCA,Val-AAC,0;tRNA-Val-AAC-3-1,GTTTCCGTAGTGTAGTGGTTATCACGTTCGCCTAACACGCGAAAGGTCCCTGGATCAAAACCAGGCGGAAACACCA,Val-AAC,0;tRNA-Val-AAC-4-1,GTTTCCGTAGTGTAGTGGTTATCACGTTCGCCTAACACGCGAAAGGTCCGCGGTTCGAAACCGGGCGGAAACACCA,Val-AAC,0;tRNA-Val-CAC-1-1,GTTTCCGTAGTGTAGTGGTTATCACGTTCGCCTCACACGCGAAAGGTCCCCGGTTCGAAACCGGGCGGAA…	750	1914	1222	543	89	78	332	263	821	46	474	2400	2934.42	3234.63	3407.8	2199.75	600.107	504.962	1038.86	1146.35	2338.78	298.467	2075.31	4690.1
tiRNA-1:34-Val-AAC-1-M3	GTTTCCGTAGTGTAGTGGTTATCACGTTCGCCTA	tiRNA-5	-	tRF-34-79MP9P9NH57S1O	34	tRNA-Val-AAC-1-1,GTTTCCGTAGTGTAGTGGTTATCACGTTCGCCTAACACGCGAAAGGTCCCCGGTTCGAAACCGGGCGGAAACACCA,Val-AAC,0;tRNA-Val-AAC-3-1,GTTTCCGTAGTGTAGTGGTTATCACGTTCGCCTAACACGCGAAAGGTCCCTGGATCAAAACCAGGCGGAAACACCA,Val-AAC,0;tRNA-Val-AAC-4-1,GTTTCCGTAGTGTAGTGGTTATCACGTTCGCCTAACACGCGAAAGGTCCGCGGTTCGAAACCGGGCGGAAACACCA,Val-AAC,0	4	1	0	0	0	0	0	0	3	0	36	4	15.6502	1.68998	0	0	0	0	0	0	8.54608	0	157.618	7.81684
tiRNA-1:34-Val-CAC-1-M3	GTTTCCGTAGTGTAGTGGTTATCACGTTCGCCTC	tiRNA-5	-	tRF-34-79MP9P9NH57S15	34	tRNA-Val-CAC-1-1,GTTTCCGTAGTGTAGTGGTTATCACGTTCGCCTCACACGCGAAAGGTCCCCGGTTCGAAACCGGGCGGAAACACCA,Val-CAC,0;tRNA-Val-CAC-4-1,GTTTCCGTAGTGTAGTGGTTATCACGTTCGCCTCACACGCGAAAGGTCCCCGGTTCGAAACTGGGCGGAAACACCA,Val-CAC,0;tRNA-Val-CAC-5-1,GTTTCCGTAGTGTAGTGGTTATCACGTTCGCCTCACACGCGTAAAGGTCCCCGGTTCGAAACCGGGCGGAAACACCA,Val-CAC,0	12	2	9	2	0	4	3	8	10	0	148	31	46.9507	3.37997	25.0984	8.10222	0	25.8955	9.38729	34.8699	28.4869	0	647.986	60.5805
tRF-1:29-Val-AAC-5	GTTTCCGTAGTGTAGTGGTTATCACGTTT	tRF-5c	-	-	29	tRNA-Val-AAC-5-1,GTTTCCGTAGTGTAGTGGTTATCACGTTTGCCTAACACGCGAAAGGTCCCCGGTTCGAAACCGGGCAGAAACACCA,Val-AAC,0	58	20	38	27	0	8	30	21	30	1	4	44	226.929	33.7997	105.971	109.38	0	51.791	93.8729	91.5336	85.4608	6.48841	17.5131	85.9852
tRF-1:15-Val-TAC-4	GTTTCCGTGGTGTAG	tRF-5a	-	-	15	tRNA-Val-TAC-4-1,GTTTCCGTGGTGTAGTGGTTATCACATTCGCCTTACACGCGAAAGGTCCTCGGGTCGAAACCGAGCGGAAACACCA,Val-TAC,0	0	3	3	11	1	0	1	2	3	1	0	0	0	5.06995	8.36612	44.5622	6.74277	0	3.1291	8.71748	8.54608	6.48841	0	0
tRF-1:23-Val-TAC-4	GTTTCCGTGGTGTAGTGGTTATC	tRF-5b	-	tRF-23-79M89P9NDD	23	tRNA-Val-TAC-4-1,GTTTCCGTGGTGTAGTGGTTATCACATTCGCCTTACACGCGAAAGGTCCTCGGGTCGAAACCGAGCGGAAACACCA,Val-TAC,0	14	14	8	7	2	8	20	2	18	1	4	4	54.7759	23.6598	22.3097	28.3578	13.4855	51.791	62.5819	8.71748	51.2765	6.48841	17.5131	7.81684
tRF-1:32-Val-TAC-4	GTTTCCGTGGTGTAGTGGTTATCACATTCGCC	tRF-5c	-	-	32	tRNA-Val-TAC-4-1,GTTTCCGTGGTGTAGTGGTTATCACATTCGCCTTACACGCGAAAGGTCCTCGGGTCGAAACCGAGCGGAAACACCA,Val-TAC,0	1	4	3	1	0	1	2	1	3	0	14	8	3.91256	6.75993	8.36612	4.05111	0	6.47387	6.25819	4.35874	8.54608	0	61.296	15.6337
tRF-+1:T15-Leu-AAG-2	GTTTGTGGTAGTTTT	tRF-1	-	-	15	pre_tRNA-Leu-AAG-2-1,CATAACTGAAGGAAAATATGTAAATACCCAGCGGCAAAGAGGTAGCGTGGCCGAGCGGTCTAAGGCGCTGGATTAAGGCTCCAGTCTCTTCGGGGGCGTGGGTTCGAATCCCACCGCTGCCAGTTTGTGGTAGTTTTGTCACTTTTGTCCCCTATGGGTTAC,Leu-AAG,122	0	0	1	16	0	1	0	0	0	0	0	0	0	0	2.78871	64.8177	0	6.47387	0	0	0	0	0	0
tRF-51:71-chrM.Pro-TGG	TAAAGACTTTTTCTCTGACCA	tRF-3b	-	tRF-21-U0EZY9X1B	21	chrM.tRNA15-ProTGG,CAGAGAATAGTTTAAATTAGAATCTTAGCTTTGGGTGCTAATGGTGGAGTTAAAGACTTTTTCTCTGACCA,Pro-TGG,50	27	7	27	33	0	26	13	26	2	0	1	1	105.639	11.8299	75.2951	133.687	0	168.321	40.6783	113.327	5.69739	0	4.37828	1.95421
tRF-53:72-chrM.Val-TAC	TAACTTGACCGCTCTGACCA	tRF-3b	-	tRF-20-UIX1Q7O6	20	chrM.tRNA2-ValTAC,CAGAGTGTAGCTTAACACAAAGCACCCAACTTACACTTAGGAGATTTCAACTTAACTTGACCGCTCTGACCA,Val-TAC,52	9	13	48	6	0	7	63	28	11	40	0	2	35.2131	21.9698	133.858	24.3067	0	45.3171	197.133	122.045	31.3356	259.536	0	3.90842
tRF-28:41-Phe-GAA-4	TAGACCGAAGATCT	tRF-2	-	-	14	tRNA-Phe-GAA-4-1,GCCGAAATAGCTCAGTTGGGAGAGCGTTAGACCGAAGATCTTAAAGGTCCCTGGTTCAATCCCGGGTTTCGGCACCA,Phe-GAA,27	1	0	0	0	0	37	0	0	0	0	0	0	3.91256	0	0	0	0	239.533	0	0	0	0	0	0
tRF-28:41-Phe-GAA-1-M4	TAGACTGAAGATCT	tRF-2	-	-	14	tRNA-Phe-GAA-1-1,GCCGAAATAGCTCAGTTGGGAGAGCGTTAGACTGAAGATCTAAAGGTCCCTGGTTCGATCCCGGGTTTCGGCACCA,Phe-GAA,27;tRNA-Phe-GAA-2-1,GCCGAAATAGCTCAGTTGGGAGAGCGTTAGACTGAAGATCTAAAGGTCCCTGGTTCAATCCCGGGTTTCGGCACCA,Phe-GAA,27;tRNA-Phe-GAA-3-1,GCCGAGATAGCTCAGTTGGGAGAGCGTTAGACTGAAGATCTAAAGGTCCCTGGTTCAATCCCGGGTTTCGGCACCA,Phe-GAA,27;tRNA-Phe-GAA-6-1,GCTGAAATAGCTCAGTTGGGAGAGCGTTAGACTGAAGATCTTAAAGTTCCCTGGTTCAACCCTGGGT…	10	0	0	0	0	0	0	0	0	0	0	0	39.1256	0	0	0	0	0	0	0	0	0	0	0
tRF-1:15-chrM.Asn-GTT	TAGATTGAAGCCAGT	tRF-5a	-	-	15	chrM.tRNA20-AsnGTT,TAGATTGAAGCCAGTTGATTAGGGTGCTTAGCTGTTAACTAAGTGTTTGTGGGTTTAAGTCCCATTGGTCTAGCCA,Asn-GTT,0	0	0	1	0	0	0	0	0	17	0	0	0	0	0	2.78871	0	0	0	0	0	48.4278	0	0	0
tRF-1:14-chrM.Gln-TTG	TAGGATGGGGTGTG	tRF-5a	-	-	14	chrM.tRNA22-GlnTTG,TAGGATGGGGTGTGATAGGTGGCACGGAGAATTTTGGATTCTCAGGGATGGGTTCGATTCTCATAGTCCTAGCCA,Gln-TTG,0	51	42	92	23	0	80	92	78	152	2	1	1	199.541	70.9793	256.561	93.1755	0	517.91	287.877	339.982	433.002	12.9768	4.37828	1.95421
tRF-1:15-chrM.Gln-TTG	TAGGATGGGGTGTGA	tRF-5a	-	-	15	chrM.tRNA22-GlnTTG,TAGGATGGGGTGTGATAGGTGGCACGGAGAATTTTGGATTCTCAGGGATGGGTTCGATTCTCATAGTCCTAGCCA,Gln-TTG,0	28	26	58	3	0	11	24	32	34	0	0	0	109.552	43.9396	161.745	12.1533	0	71.2126	75.0983	139.48	96.8556	0	0	0
tRF-1:16-chrM.Gln-TTG	TAGGATGGGGTGTGAT	tRF-5a	-	tRF-16-V29K9UE	16	chrM.tRNA22-GlnTTG,TAGGATGGGGTGTGATAGGTGGCACGGAGAATTTTGGATTCTCAGGGATGGGTTCGATTCTCATAGTCCTAGCCA,Gln-TTG,0	169	246	303	200	1	79	57	56	250	7	0	33	661.223	415.736	844.979	810.222	6.74277	511.436	178.359	244.09	712.174	45.4189	0	64.4889
tRF-1:22-chrM.Gln-TTG	TAGGATGGGGTGTGATAGGTGG	tRF-5b	-	tRF-22-V29K9UV34	22	chrM.tRNA22-GlnTTG,TAGGATGGGGTGTGATAGGTGGCACGGAGAATTTTGGATTCTCAGGGATGGGTTCGATTCTCATAGTCCTAGCCA,Gln-TTG,0	6	19	0	0	0	27	0	0	0	7	1	0	23.4754	32.1097	0	0	0	174.795	0	0	0	45.4189	4.37828	0
tRF-1:23-chrM.Gln-TTG	TAGGATGGGGTGTGATAGGTGGC	tRF-5b	-	tRF-23-V29K9UV3D9	23	chrM.tRNA22-GlnTTG,TAGGATGGGGTGTGATAGGTGGCACGGAGAATTTTGGATTCTCAGGGATGGGTTCGATTCTCATAGTCCTAGCCA,Gln-TTG,0	17	14	28	3	0	0	0	2	0	1	0	1	66.5136	23.6598	78.0838	12.1533	0	0	0	8.71748	0	6.48841	0	1.95421
tRF-1:24-chrM.Gln-TTG	TAGGATGGGGTGTGATAGGTGGCA	tRF-5b	-	tRF-24-V29K9UV3IU	24	chrM.tRNA22-GlnTTG,TAGGATGGGGTGTGATAGGTGGCACGGAGAATTTTGGATTCTCAGGGATGGGTTCGATTCTCATAGTCCTAGCCA,Gln-TTG,0	5	9	12	0	0	0	0	9	6	0	0	1	19.5628	15.2098	33.4645	0	0	0	0	39.2287	17.0922	0	0	1.95421
tRF-1:29-chrM.Gln-TTG	TAGGATGGGGTGTGATAGGTGGCACGGAG	tRF-5c	-	tRF-29-V29K9UV365IS	29	chrM.tRNA22-GlnTTG,TAGGATGGGGTGTGATAGGTGGCACGGAGAATTTTGGATTCTCAGGGATGGGTTCGATTCTCATAGTCCTAGCCA,Gln-TTG,0	5	3	6	0	0	1	8	0	9	0	0	0	19.5628	5.06995	16.7322	0	0	6.47387	25.0328	0	25.6382	0	0	0
tRF-1:30-chrM.Gln-TTG	TAGGATGGGGTGTGATAGGTGGCACGGAGA	tRF-5c	-	tRF-30-V29K9UV36562	30	chrM.tRNA22-GlnTTG,TAGGATGGGGTGTGATAGGTGGCACGGAGAATTTTGGATTCTCAGGGATGGGTTCGATTCTCATAGTCCTAGCCA,Gln-TTG,0	12	1	3	5	0	3	3	3	5	0	0	0	46.9507	1.68998	8.36612	20.2555	0	19.4216	9.38729	13.0762	14.2435	0	0	0
tiRNA-1:34-chrM.Gln-TTG	TAGGATGGGGTGTGATAGGTGGCACGGAGAATTT	tiRNA-5	-	tRF-34-V29K9UV36562FQ	34	chrM.tRNA22-GlnTTG,TAGGATGGGGTGTGATAGGTGGCACGGAGAATTTTGGATTCTCAGGGATGGGTTCGATTCTCATAGTCCTAGCCA,Gln-TTG,0	0	2	0	1	1	1	0	0	0	0	66	0	0	3.37997	0	4.05111	6.74277	6.47387	0	0	0	0	288.967	0
tRF-50:69-chrM.Tyr-GTA	TAGGCCTCTTTTTACCACCA	tRF-3b	-	tRF-20-VJ4ZZ526	20	chrM.tRNA18-TyrGTA,GGTAAAATGGCTGAGTGAAGCATTGGACTGTAAATCTAAAGACAGGGGTTAGGCCTCTTTTTACCACCA,Tyr-GTA,49	0	0	0	0	0	0	0	13	0	0	0	0	0	0	0	0	0	0	0	56.6636	0	0	0	0
tRF-+1:T16-Thr-CGT-3	TAGGGTGTGCGTGTTT	tRF-1	-	-	16	pre_tRNA-Thr-CGT-3-1,GCAATTCGGTCATAAAAGAAGCCACAGAATCAGCACGGCTGGCTCTGTGGCTTAGTTGGCTAAAGCGCCTGTCTCGTAAACAGGAGATCCTGGGTTCGAATCCCAGCGGGGCCTTAGGGTGTGCGTGTTTTTTTTTCTTTCCCCCTTTAATAAG,Thr-CGT,114	8	0	0	0	0	0	0	0	0	0	0	0	31.3005	0	0	0	0	0	0	0	0	0	0	0
tRF-+1:T17-Thr-CGT-3	TAGGGTGTGCGTGTTTT	tRF-1	-	-	17	pre_tRNA-Thr-CGT-3-1,GCAATTCGGTCATAAAAGAAGCCACAGAATCAGCACGGCTGGCTCTGTGGCTTAGTTGGCTAAAGCGCCTGTCTCGTAAACAGGAGATCCTGGGTTCGAATCCCAGCGGGGCCTTAGGGTGTGCGTGTTTTTTTTTCTTTCCCCCTTTAATAAG,Thr-CGT,114	17	0	1	6	0	0	0	0	4	0	0	0	66.5136	0	2.78871	24.3067	0	0	0	0	11.3948	0	0	0
tRF-+1:T18-Thr-CGT-3	TAGGGTGTGCGTGTTTTT	tRF-1	1008	-	18	pre_tRNA-Thr-CGT-3-1,GCAATTCGGTCATAAAAGAAGCCACAGAATCAGCACGGCTGGCTCTGTGGCTTAGTTGGCTAAAGCGCCTGTCTCGTAAACAGGAGATCCTGGGTTCGAATCCCAGCGGGGCCTTAGGGTGTGCGTGTTTTTTTTTCTTTCCCCCTTTAATAAG,Thr-CGT,114	0	0	11	4	0	1	0	0	0	0	25	0	0	0	30.6758	16.2044	0	6.47387	0	0	0	0	109.457	0
tRF-53:72-chrM.Glu-TTC	TAGTCCGTGCGAGAATACCA	tRF-3b	-	tRF-20-VMMV5BU6	20	chrM.tRNA16-GluTTC,GTTCTTGTAGTTGAAATACAACGATGGTTTTTCATATCATTGGTCGTGGTTGTAGTCCGTGCGAGAATACCA,Glu-TTC,52	0	0	0	0	0	0	15	0	0	0	0	0	0	0	0	0	0	0	46.9365	0	0	0	0	0
tRF-54:75-Trp-CCA-1-M3	TCAAATCACGTCGGGGTCACCA	tRF-3b	-	tRF-22-8B8HWKS52	22	tRNA-Trp-CCA-1-1,GGCCTCGTGGCGCAACGGTAGCGCGTCTGACTCCAGATCAGAAGGTTGCGTGTTCAAATCACGTCGGGGTCACCA,Trp-CCA,53;tRNA-Trp-CCA-3-1,GACCTCGTGGCGCAACGGTAGCGCGTCTGACTCCAGATCAGAAGGTTGCGTGTTCAAATCACGTCGGGGTCACCA,Trp-CCA,53;tRNA-Trp-CCA-5-1,GACCTCGTGGCGCAACGGCAGCGCGTCTGACTCCAGATCAGAAGGTTGCGTGTTCAAATCACGTCGGGGTCACCA,Trp-CCA,53	0	6	16	0	0	1	27	0	12	3	1	2	0	10.1399	44.6193	0	0	6.47387	84.4856	0	34.1843	19.4652	4.37828	3.90842
tRF-54:72-Pro-AGG-1-M7-18:C>A	TCAAATCCCGGACGAGCCA	tRF-3b	-	-	19	tRNA-Pro-AGG-1-1,GGCTCGTTGGTCTAGGGGTATGATTCTCGCTTAGGATGCGAGAGGTCCCGGGTTCAAATCCCGGACGAGCCCCCA,Pro-AGG,53;tRNA-Pro-AGG-2-1,GGCTCGTTGGTCTAGGGGTATGATTCTCGCTTAGGGTGCGAGAGGTCCCGGGTTCAAATCCCGGACGAGCCCCCA,Pro-AGG,53;tRNA-Pro-CGG-1-1,GGCTCGTTGGTCTAGGGGTATGATTCTCGCTTCGGGTGCGAGAGGTCCCGGGTTCAAATCCCGGACGAGCCCCCA,Pro-CGG,53;tRNA-Pro-CGG-2-1,GGCTCGTTGGTCTAGGGGTATGATTCTCGCTTCGGGTGTGAGAGGTCCCGGGTTCAAATCCCGGACGAGC…	0	0	0	13	0	0	0	0	0	0	0	0	0	0	0	52.6644	0	0	0	0	0	0	0	0
tRF-54:74-Pro-AGG-1-M7-20:C>A	TCAAATCCCGGACGAGCCCCA	tRF-3b	-	-	21	tRNA-Pro-AGG-1-1,GGCTCGTTGGTCTAGGGGTATGATTCTCGCTTAGGATGCGAGAGGTCCCGGGTTCAAATCCCGGACGAGCCCCCA,Pro-AGG,53;tRNA-Pro-AGG-2-1,GGCTCGTTGGTCTAGGGGTATGATTCTCGCTTAGGGTGCGAGAGGTCCCGGGTTCAAATCCCGGACGAGCCCCCA,Pro-AGG,53;tRNA-Pro-CGG-1-1,GGCTCGTTGGTCTAGGGGTATGATTCTCGCTTCGGGTGCGAGAGGTCCCGGGTTCAAATCCCGGACGAGCCCCCA,Pro-CGG,53;tRNA-Pro-CGG-2-1,GGCTCGTTGGTCTAGGGGTATGATTCTCGCTTCGGGTGTGAGAGGTCCCGGGTTCAAATCCCGGACGAGC…	0	0	1	1	12	0	0	2	0	0	0	0	0	0	2.78871	4.05111	80.9132	0	0	8.71748	0	0	0	0
tRF-54:75-Pro-AGG-1-M7	TCAAATCCCGGACGAGCCCCCA	tRF-3b	3002b	tRF-22-8B8SOUPR2	22	tRNA-Pro-AGG-1-1,GGCTCGTTGGTCTAGGGGTATGATTCTCGCTTAGGATGCGAGAGGTCCCGGGTTCAAATCCCGGACGAGCCCCCA,Pro-AGG,53;tRNA-Pro-AGG-2-1,GGCTCGTTGGTCTAGGGGTATGATTCTCGCTTAGGGTGCGAGAGGTCCCGGGTTCAAATCCCGGACGAGCCCCCA,Pro-AGG,53;tRNA-Pro-CGG-1-1,GGCTCGTTGGTCTAGGGGTATGATTCTCGCTTCGGGTGCGAGAGGTCCCGGGTTCAAATCCCGGACGAGCCCCCA,Pro-CGG,53;tRNA-Pro-CGG-2-1,GGCTCGTTGGTCTAGGGGTATGATTCTCGCTTCGGGTGTGAGAGGTCCCGGGTTCAAATCCCGGACGAGC…	12	0	16	0	5	1	11	1	2	17	56	5	46.9507	0	44.6193	0	33.7139	6.47387	34.4201	4.35874	5.69739	110.303	245.184	9.77104
tRF-55:76-Thr-TGT-4-M3	TCAAATCTCGCTGGGGCCTCCA	tRF-3b	-	tRF-22-8BWSNKP92	22	tRNA-Thr-TGT-4-1,GGCTCCATAGCTCAGGGGTTAGAGCACTGGTCTTGTAAACCAGGGGTCGCGAGTTCAAATCTCGCTGGGGCCTCCA,Thr-TGT,54;tRNA-Thr-TGT-5-1,GGCCCTATAGCTCAGGGGTTAGAGCACTGGTCTTGTAAACCAGGGGTCGCGAGTTCAAATCTCGCTGGGGCCTCCA,Thr-TGT,54;tRNA-Thr-TGT-6-1,GGCTCCATAGCTCAGGGGTTAGAGCACTGGTCTTGTAAACCAGGGTCGCGAGTTCAAATCTCGCTGGGGCCTCCA,Thr-TGT,53	1	0	28	0	0	0	1	2	0	8	42	0	3.91256	0	78.0838	0	0	0	3.1291	8.71748	0	51.9073	183.888	0
tRF-54:75-Gln-CTG-1-M2	TCAAATCTCGGTGGAACCTCCA	tRF-3b	-	tRF-22-8BWS72092	22	tRNA-Gln-CTG-1-1,GGTTCCATGGTGTAATGGTTAGCACTCTGGACTCTGAATCCAGCGATCCGAGTTCAAATCTCGGTGGAACCTCCA,Gln-CTG,53;tRNA-Gln-CTG-5-1,GGTTCCATGGTGTAATGGTTAGCACTCTGGACTCTGAATCCGGTAATCCGAGTTCAAATCTCGGTGGAACCTCCA,Gln-CTG,53	24	40	91	27	41	54	58	22	91	28	31	0	93.9015	67.5993	253.772	109.38	276.454	349.589	181.488	95.8923	259.231	181.675	135.727	0
tRF-54:75-Gln-TTG-1-M2	TCAAATCTCGGTGGGACCTCCA	tRF-3b	3004b	tRF-22-8BWS7K092	22	tRNA-Gln-TTG-1-1,GGTCCCATGGTGTAATGGTTAGCACTCTGGACTTTGAATCCAGCGATCCGAGTTCAAATCTCGGTGGGACCTCCA,Gln-TTG,53;tRNA-Gln-TTG-3-1,GGCCCCATGGTGTAATGGTTAGCACTCTGGACTTTGAATCCAGCGATCCGAGTTCAAATCTCGGTGGGACCTCCA,Gln-TTG,53	17	1	38	23	22	43	32	3	30	55	1	2	66.5136	1.68998	105.971	93.1755	148.341	278.377	100.131	13.0762	85.4608	356.862	4.37828	3.90842
tRF-54:75-Trp-CCA-2	TCAAGTCACGTCGGGGTCACCA	tRF-3b	-	tRF-22-808HWKS52	22	tRNA-Trp-CCA-2-1,GACCTCGTGGCGCAATGGTAGCGCGTCTGACTCCAGATCAGAAGGTTGCGTGTTCAAGTCACGTCGGGGTCACCA,Trp-CCA,53	0	0	0	0	0	0	0	0	1	0	71	0	0	0	0	0	0	0	0	0	2.84869	0	310.858	0
tRF-54:75-Gln-CTG-2	TCAAGTCTCGGTGGAACCTCCA	tRF-3b	-	-	22	tRNA-Gln-CTG-2-1,GGTTCCATGGTGTAATGGTTAGCACTCTGGACTCTGAATCCAGCGATCCGAGTTCAAGTCTCGGTGGAACCTCCA,Gln-CTG,53	0	6	0	0	0	0	0	5	2	3	2	0	0	10.1399	0	0	0	0	0	21.7937	5.69739	19.4652	8.75657	0
tRF-54:75-Ala-AGC-2-M2	TCAATCCCCGGCACCTCCACCA	tRF-3b	-	tRF-22-8EKSP1852	22	tRNA-Ala-AGC-2-1,GGGGGTGTAGCTCAGTGGTAGAGCGCGTGCTTAGCATGCACGAGGCCCCGGGTTCAATCCCCGGCACCTCCACCA,Ala-AGC,53;tRNA-Ala-AGC-3-1,GGGGGTGTAGCTCAGTGGTAGAGCGCGTGCTTAGCATGTACGAGGTCCCGGGTTCAATCCCCGGCACCTCCACCA,Ala-AGC,53	0	6	0	11	52	0	0	1	14	0	0	0	0	10.1399	0	44.5622	350.624	0	0	4.35874	39.8817	0	0	0
tRF-58:74-chrM.Phe-GAA	TCACCCCATAAACACCA	tRF-3a	-	tRF-17-81KLB52	17	chrM.tRNA1-PheGAA,GTTTATGTAGCTTACCTCCTCAAAGCAATACACTGAAAATGTTTAGACGGGCTCACATCACCCCATAAACACCA,Phe-GAA,57	0	0	0	0	0	0	0	12	0	0	0	0	0	0	0	0	0	0	0	52.3049	0	0	0	0
tRF-59:75-Trp-CCA-1-M5	TCACGTCGGGGTCACCA	tRF-3a	-	tRF-17-8HWKS52	17	tRNA-Trp-CCA-1-1,GGCCTCGTGGCGCAACGGTAGCGCGTCTGACTCCAGATCAGAAGGTTGCGTGTTCAAATCACGTCGGGGTCACCA,Trp-CCA,58;tRNA-Trp-CCA-2-1,GACCTCGTGGCGCAATGGTAGCGCGTCTGACTCCAGATCAGAAGGTTGCGTGTTCAAGTCACGTCGGGGTCACCA,Trp-CCA,58;tRNA-Trp-CCA-3-1,GACCTCGTGGCGCAACGGTAGCGCGTCTGACTCCAGATCAGAAGGTTGCGTGTTCAAATCACGTCGGGGTCACCA,Trp-CCA,58;tRNA-Trp-CCA-4-1,GACCTCGTGGCGCAACGGTAGCGCGTCTGACTCCAGATCAGAAGGCTGCGTGTTCGAATCACGTCGGGGT…	20	26	107	70	35	64	238	111	122	95	71	93	78.2512	43.9396	298.392	283.578	235.997	414.328	744.725	483.82	347.541	616.399	310.858	181.741
tRF-1:16-Glu-TTC-2	TCCCACATGGTCTAGC	tRF-5a	-	tRF-16-86J8WPD	16	tRNA-Glu-TTC-2-1,TCCCACATGGTCTAGCGGTTAGGATTCCTGGTTTTCACCCAGGCGGCCCGGGTTCGACTCCCGGTGTGGGAACCA,Glu-TTC,0	0	0	9	0	0	0	21	1	0	0	0	0	0	0	25.0984	0	0	0	65.711	4.35874	0	0	0	0
tRF-1:28-Glu-TTC-2	TCCCACATGGTCTAGCGGTTAGGATTCC	tRF-5c	-	tRF-28-86J8WPMN1E0J	28	tRNA-Glu-TTC-2-1,TCCCACATGGTCTAGCGGTTAGGATTCCTGGTTTTCACCCAGGCGGCCCGGGTTCGACTCCCGGTGTGGGAACCA,Glu-TTC,0	18	94	61	45	3	9	16	83	49	10	2	64	70.4261	158.858	170.111	182.3	20.2283	58.2649	50.0656	361.776	139.586	64.8841	8.75657	125.069
tRF-1:29-Glu-TTC-2	TCCCACATGGTCTAGCGGTTAGGATTCCT	tRF-5c	-	tRF-29-86J8WPMN1EJ3	29	tRNA-Glu-TTC-2-1,TCCCACATGGTCTAGCGGTTAGGATTCCTGGTTTTCACCCAGGCGGCCCGGGTTCGACTCCCGGTGTGGGAACCA,Glu-TTC,0	1340	1584	1600	538	156	313	678	1098	1628	75	436	666	5242.83	2676.93	4461.93	2179.5	1051.87	2026.32	2121.53	4785.9	4637.67	486.631	1908.93	1301.5
tRF-1:30-Glu-TTC-2	TCCCACATGGTCTAGCGGTTAGGATTCCTG	tRF-5c	-	tRF-30-86J8WPMN1E8Y	30	tRNA-Glu-TTC-2-1,TCCCACATGGTCTAGCGGTTAGGATTCCTGGTTTTCACCCAGGCGGCCCGGGTTCGACTCCCGGTGTGGGAACCA,Glu-TTC,0	161	526	206	40	17	58	95	122	317	34	156	128	629.922	888.931	574.474	162.044	114.627	375.485	297.264	531.767	903.036	220.606	683.012	250.139
tRF-1:31-Glu-TTC-2	TCCCACATGGTCTAGCGGTTAGGATTCCTGG	tRF-5c	5028c	tRF-31-86J8WPMN1E8Y0	31	tRNA-Glu-TTC-2-1,TCCCACATGGTCTAGCGGTTAGGATTCCTGGTTTTCACCCAGGCGGCCCGGGTTCGACTCCCGGTGTGGGAACCA,Glu-TTC,0	208	1428	266	38	15	40	204	101	421	18	346	472	813.813	2413.3	741.796	153.942	101.142	258.955	638.336	440.233	1199.3	116.791	1514.89	922.387
tRF-1:32-Glu-TTC-2	TCCCACATGGTCTAGCGGTTAGGATTCCTGGT	tRF-5c	-	tRF-32-86J8WPMN1E8YN	32	tRNA-Glu-TTC-2-1,TCCCACATGGTCTAGCGGTTAGGATTCCTGGTTTTCACCCAGGCGGCCCGGGTTCGACTCCCGGTGTGGGAACCA,Glu-TTC,0	113	625	44	18	2	7	54	34	118	7	6	385	442.12	1056.24	122.703	72.92	13.4855	45.3171	168.971	148.197	336.146	45.4189	26.2697	752.37
tiRNA-1:34-Glu-TTC-2	TCCCACATGGTCTAGCGGTTAGGATTCCTGGTTT	tiRNA-5	-	tRF-34-86J8WPMN1E8Y2Q	34	tRNA-Glu-TTC-2-1,TCCCACATGGTCTAGCGGTTAGGATTCCTGGTTTTCACCCAGGCGGCCCGGGTTCGACTCCCGGTGTGGGAACCA,Glu-TTC,0	22	34	14	8	0	11	19	26	25	7	89	133	86.0764	57.4594	39.0419	32.4089	0	71.2126	59.4528	113.327	71.2174	45.4189	389.667	259.91
tRF-69:85-Leu-TAG-2	TCCCACCACTGCCACCA	tRF-3a	-	-	17	tRNA-Leu-TAG-2-1,GGTAGTGTGGCCGAGCGGTCTAAGGCGCTGGATTTAGGCTCCAGTCTCTTCGGGGGCGTGGGTTCGAATCCCACCACTGCCACCA,Leu-TAG,68	5	1	2	0	24	0	12	0	1	0	0	1	19.5628	1.68998	5.57742	0	161.826	0	37.5492	0	2.84869	0	0	1.95421
tRF-60:77-Asn-GTT-1	TCCCACCCAGGGACGCCA	tRF-3a	-	-	18	tRNA-Asn-GTT-1-1,GTCTCTGTGGCGCAATCGGTTAGCGCGTTCGGCTGTTAACCGAAAGGTTGGTGGTTCGATCCCACCCAGGGACGCCA,Asn-GTT,59	0	0	0	0	0	0	0	12	0	0	0	0	0	0	0	0	0	0	0	52.3049	0	0	0	0
tRF-69:85-Leu-AAG-1-M6	TCCCACCGCTGCCACCA	tRF-3a	-	tRF-17-863IP52	17	tRNA-Leu-AAG-1-1,GGTAGCGTGGCCGAGCGGTCTAAGGCGCTGGATTAAGGCTCCAGTCTCTTCGGAGGCGTGGGTTCGAATCCCACCGCTGCCACCA,Leu-AAG,68;tRNA-Leu-AAG-2-1,GGTAGCGTGGCCGAGCGGTCTAAGGCGCTGGATTAAGGCTCCAGTCTCTTCGGGGGCGTGGGTTCGAATCCCACCGCTGCCACCA,Leu-AAG,68;tRNA-Leu-AAG-3-1,GGTAGCGTGGCCGAGCGGTCTAAGGCGCTGGATTAAGGCTCCAGTCTCTTCGGGGGCGTGGGTTCAAATCCCACCGCTGCCACCA,Leu-AAG,68;tRNA-Leu-AAG-4-1,GGTAGCGTGGCCGAGTGGTCTAAGACGCTGGATTAAGGCT…	1	5	14	1	1	11	36	6	19	0	1	15	3.91256	8.44991	39.0419	4.05111	6.74277	71.2126	112.647	26.1525	54.1252	0	4.37828	29.3131
tRF-70:86-Leu-CAG-1	TCCCACTCCTGACACCA	tRF-3a	-	tRF-17-8647O52	17	tRNA-Leu-CAG-1-1,GTCAGGATGGCCGAGCGGTCTAAGGCGCTGCGTTCAGGTCGCAGTCTCCCCTGGAGGCGTGGGTTCGAATCCCACTCCTGACACCA,Leu-CAG,69	0	2	10	10	0	21	1	0	0	0	0	2	0	3.37997	27.8871	40.5111	0	135.951	3.1291	0	0	0	0	3.90842
tRF-70:86-Leu-CAA-1-M5	TCCCACTTCTGACACCA	tRF-3a	-	tRF-17-86N7O52	17	tRNA-Leu-CAA-1-1,GTCAGGATGGCCGAGTGGTCTAAGGCGCCAGACTCAAGTTCTGGTCTCCAATGGAGGCGTGGGTTCGAATCCCACTTCTGACACCA,Leu-CAA,69;tRNA-Leu-CAA-2-1,GTCAGGATGGCCGAGTGGTCTAAGGCGCCAGACTCAAGTTCTGGTCTCCGTATGGAGGCGTGGGTTCGAATCCCACTTCTGACACCA,Leu-CAA,70;tRNA-Leu-CAA-3-1,GTCAGGATGGCCGAGTGGTCTAAGGCGCCAGACTCAAGTTCTGGTCTCCGCATGGAGGCGTGGGTTCGAATCCCACTTCTGACACCA,Leu-CAA,70;tRNA-Leu-CAA-4-1,GTCAGGATGGCCGAGTGGTCTAAGGCGCCAGACTC…	8	28	52	15	26	2	170	64	40	2	51	136	31.3005	47.3195	145.013	60.7666	175.312	12.9477	531.947	278.959	113.948	12.9768	223.292	265.772
tRF-61:77-Thr-AGT-1-M2	TCCCAGCGGTGCCTCCA	tRF-3a	-	tRF-17-86Q3P92	17	tRNA-Thr-AGT-1-1,GGCGCCGTGGCTTAGTTGGTTAAAGCGCCTGTCTAGTAAACAGGAGATCCTGGGTTCGAATCCCAGCGGTGCCTCCA,Thr-AGT,60;tRNA-Thr-AGT-5-1,GGCGCCGTGGCTTAGCTGGTTAAAGCGCCTGTCTAGTAAACAGGAGATCCTGGGTTCGAATCCCAGCGGTGCCTCCA,Thr-AGT,60	0	0	0	0	51	1	0	1	0	0	0	17	0	0	0	0	343.881	6.47387	0	4.35874	0	0	0	33.2216
tRF-61:77-Thr-TGT-1	TCCCAGTAGAGCCTCCA	tRF-3a	-	tRF-17-86S2P92	17	tRNA-Thr-TGT-1-1,GGCTCTATGGCTTAGTTGGTTAAAGCGCCTGTCTTGTAAACAGGAGATCCTGGGTTCGAATCCCAGTAGAGCCTCCA,Thr-TGT,60	0	0	24	0	0	0	0	2	0	3	2	0	0	0	66.929	0	0	0	0	8.71748	0	19.4652	8.75657	0
tRF-1:28-Glu-TTC-1	TCCCATATGGTCTAGCGGTTAGGATTCC	tRF-5c	-	tRF-28-86V8WPMN1E0J	28	tRNA-Glu-TTC-1-1,TCCCATATGGTCTAGCGGTTAGGATTCCTGGTTTTCACCCAGGTGGCCCGGGTTCGACTCCCGGTATGGGAACCA,Glu-TTC,0	21	10	31	1	4	7	14	24	14	11	23	2	82.1638	16.8998	86.4499	4.05111	26.9711	45.3171	43.8074	104.61	39.8817	71.3725	100.701	3.90842
tRF-1:29-Glu-TTC-1	TCCCATATGGTCTAGCGGTTAGGATTCCT	tRF-5c	-	tRF-29-86V8WPMN1EJ3	29	tRNA-Glu-TTC-1-1,TCCCATATGGTCTAGCGGTTAGGATTCCTGGTTTTCACCCAGGTGGCCCGGGTTCGACTCCCGGTATGGGAACCA,Glu-TTC,0	834	454	904	304	41	218	238	576	623	69	262	308	3263.08	767.252	2520.99	1231.54	276.454	1411.3	744.725	2510.64	1774.74	447.7	1147.11	601.896
tRF-1:30-Glu-TTC-1	TCCCATATGGTCTAGCGGTTAGGATTCCTG	tRF-5c	-	tRF-30-86V8WPMN1E8Y	30	tRNA-Glu-TTC-1-1,TCCCATATGGTCTAGCGGTTAGGATTCCTGGTTTTCACCCAGGTGGCCCGGGTTCGACTCCCGGTATGGGAACCA,Glu-TTC,0	115	252	138	14	5	16	38	96	129	11	40	117	449.945	425.876	384.842	56.7155	33.7139	103.582	118.906	418.439	367.482	71.3725	175.131	228.642
tRF-1:31-Glu-TTC-1	TCCCATATGGTCTAGCGGTTAGGATTCCTGG	tRF-5c	-	tRF-31-86V8WPMN1E8Y0	31	tRNA-Glu-TTC-1-1,TCCCATATGGTCTAGCGGTTAGGATTCCTGGTTTTCACCCAGGTGGCCCGGGTTCGACTCCCGGTATGGGAACCA,Glu-TTC,0	167	710	206	17	3	21	86	65	151	14	42	190	653.398	1199.89	574.474	68.8688	20.2283	135.951	269.102	283.318	430.153	90.8377	183.888	371.3
tRF-1:32-Glu-TTC-1	TCCCATATGGTCTAGCGGTTAGGATTCCTGGT	tRF-5c	-	tRF-32-86V8WPMN1E8YN	32	tRNA-Glu-TTC-1-1,TCCCATATGGTCTAGCGGTTAGGATTCCTGGTTTTCACCCAGGTGGCCCGGGTTCGACTCCCGGTATGGGAACCA,Glu-TTC,0	34	193	29	2	2	2	12	8	25	10	135	165	133.027	326.167	80.8725	8.10222	13.4855	12.9477	37.5492	34.8699	71.2174	64.8841	591.068	322.444
tiRNA-1:34-Glu-TTC-1	TCCCATATGGTCTAGCGGTTAGGATTCCTGGTTT	tiRNA-5	-	tRF-34-86V8WPMN1E8Y2Q	34	tRNA-Glu-TTC-1-1,TCCCATATGGTCTAGCGGTTAGGATTCCTGGTTTTCACCCAGGTGGCCCGGGTTCGACTCCCGGTATGGGAACCA,Glu-TTC,0	16	8	6	6	1	5	5	22	14	1	66	22	62.601	13.5199	16.7322	24.3067	6.74277	32.3694	15.6455	95.8923	39.8817	6.48841	288.967	42.9926
tRF-69:85-Ser-GCT-3-M4	TCCCATCCTCGTCGCCA	tRF-3a	-	tRF-17-8689SV2	17	tRNA-Ser-GCT-3-1,GACGAGGTGGCCGAGTGGTTAAGGCGATGGACTGCTAATCCATTGTGCTTTGCACGCGTGGGTTCGAATCCCATCCTCGTCGCCA,Ser-GCT,68;tRNA-Ser-GCT-4-1,GACGAGGTGGCCGAGTGGTTAAGGCGATGGACTGCTAATCCATTGTGCTCTGCACGCGTGGGTTCGAATCCCATCCTCGTCGCCA,Ser-GCT,68;tRNA-Ser-GCT-5-1,GACGAGGTGGCCGAGTGGTTAAGGCGATGGACTGCTAATCCATTGTGCTCTGCACACGTGGGTTCGAATCCCATCCTCGTCGCCA,Ser-GCT,68;tRNA-Ser-GCT-6-1,GGAGAGGCCTGGCCGAGTGGTTAAGGCGATGGACTGCTAA…	0	0	9	0	0	2	0	0	17	0	0	23	0	0	25.0984	0	0	12.9477	0	0	48.4278	0	0	44.9468
tRF-60:76-chrM.Asn-GTT	TCCCATTGGTCTAGCCA	tRF-3a	-	-	17	chrM.tRNA20-AsnGTT,TAGATTGAAGCCAGTTGATTAGGGTGCTTAGCTGTTAACTAAGTGTTTGTGGGTTTAAGTCCCATTGGTCTAGCCA,Asn-GTT,59	0	0	8	0	0	0	0	0	0	0	0	0	0	0	22.3097	0	0	0	0	0	0	0	0	0
tRF-58:75-Ala-AGC-5	TCCCCAGCACCTCCACCA	tRF-3a	-	tRF-18-8RF546D2	18	tRNA-Ala-AGC-5-1,GGGGGTGTAGCTCAGTGGTAGAGCGCGTGCTTAGCATGCACGAGGCCCTGGGTTCAATCCCCAGCACCTCCACCA,Ala-AGC,57	0	3	2	14	1	0	0	0	1	0	2	0	0	5.06995	5.57742	56.7155	6.74277	0	0	0	2.84869	0	8.75657	0
tRF-58:75-Ala-AGC-4	TCCCCAGCATCTCCACCA	tRF-3a	-	tRF-18-8RFQ46D2	18	tRNA-Ala-AGC-4-1,GGGGATGTAGCTCAGTGGTAGAGCGCATGCTTAGCATGCATGAGGTCCCGGGTTCGATCCCCAGCATCTCCACCA,Ala-AGC,57	0	0	9	0	0	1	0	0	0	0	71	1	0	0	25.0984	0	0	6.47387	0	0	0	0	310.858	1.95421
tRF-58:75-Ala-AGC-1	TCCCCAGTACCTCCACCA	tRF-3a	3019a	tRF-18-8R1546D2	18	tRNA-Ala-AGC-1-1,GGGGGTATAGCTCAGTGGTAGAGCGCGTGCTTAGCATGCACGAGGTCCTGGGTTCGATCCCCAGTACCTCCACCA,Ala-AGC,57	0	0	21	2	8	3	0	0	1	0	0	0	0	0	58.5629	8.10222	53.9422	19.4216	0	0	2.84869	0	0	0
tRF-58:75-Ala-AGC-2-M4	TCCCCGGCACCTCCACCA	tRF-3a	3020a	tRF-18-8R6546D2	18	tRNA-Ala-AGC-2-1,GGGGGTGTAGCTCAGTGGTAGAGCGCGTGCTTAGCATGCACGAGGCCCCGGGTTCAATCCCCGGCACCTCCACCA,Ala-AGC,57;tRNA-Ala-AGC-3-1,GGGGGTGTAGCTCAGTGGTAGAGCGCGTGCTTAGCATGTACGAGGTCCCGGGTTCAATCCCCGGCACCTCCACCA,Ala-AGC,57;tRNA-Ala-TGC-1-1,GGGGGTGTAGCTCAGTGGTAGAGCGCATGCTTTGCATGTATGAGGTCCCGGGTTCGATCCCCGGCACCTCCACCA,Ala-TGC,57;tRNA-Ala-TGC-6-1,GGGGGTGTAGCTCAGTGGTAGAGCACATGCTTTGCATGTGTGAGGCCCCGGGTTCGATCCCCGGCACCTC…	2	1	27	9	189	35	23	35	34	2	149	4	7.82512	1.68998	75.2951	36.46	1274.38	226.586	71.9692	152.556	96.8556	12.9768	652.364	7.81684
tRF-58:75-Ala-CGC-1-M6	TCCCCGGCATCTCCACCA	tRF-3a	3021a	tRF-18-8R6Q46D2	18	tRNA-Ala-CGC-1-1,GGGGATGTAGCTCAGTGGTAGAGCGCATGCTTCGCATGTATGAGGTCCCGGGTTCGATCCCCGGCATCTCCACCA,Ala-CGC,57;tRNA-Ala-CGC-2-1,GGGGATGTAGCTCAGTGGTAGAGCGCATGCTTCGCATGTATGAGGCCCCGGGTTCGATCCCCGGCATCTCCACCA,Ala-CGC,57;tRNA-Ala-CGC-3-1,GGGGATGTAGCTCAGTGGTAGAGCGCGCGCTTCGCATGTGTGAGGTCCCGGGTTCAATCCCCGGCATCTCCACCA,Ala-CGC,57;tRNA-Ala-TGC-2-1,GGGGATGTAGCTCAGTGGTAGAGCGCATGCTTTGCATGTATGAGGTCCCGGGTTCGATCCCCGGCATCTC…	30	16	87	31	35	66	2	50	34	138	73	89	117.377	27.0397	242.618	125.584	235.997	427.276	6.25819	217.937	96.8556	895.4	319.615	173.925
tRF-60:77-Ile-AAT-1-M4	TCCCCGTACGGGCCACCA	tRF-3a	3022a	tRF-18-8RSH66D2	18	tRNA-Ile-AAT-1-1,GGCCGGTTAGCTCAGTTGGTTAGAGCGTGGCGCTAATAACGCCAAGGTCGCGGGTTCGATCCCCGTACGGGCCACCA,Ile-AAT,59;tRNA-Ile-AAT-5-1,GGCCGGTTAGCTCAGTTGGTTAGAGCGTGGTGCTAATAACGCCAAGGTCGCGGGTTCGATCCCCGTACGGGCCACCA,Ile-AAT,59;tRNA-Ile-AAT-7-1,GGCCGGTTAGCTCAGTTGGTCAGAGCGTGGTGCTAATAACGCCAAGGTCGCGGGTTCGATCCCCGTACGGGCCACCA,Ile-AAT,59;tRNA-Ile-AAT-8-1,GGCCGGTTAGCTCAGTCGGCTAGAGCGTGGTGCTAATAACGCCAAGGTCGCGGGTTCGATCCCC…	16	9	56	12	0	1	66	44	2	0	42	0	62.601	15.2098	156.168	48.6133	0	6.47387	206.52	191.785	5.69739	0	183.888	0
tRF-59:75-Pro-AGG-1-M7	TCCCGGACGAGCCCCCA	tRF-3a	-	tRF-17-8SOUPR2	17	tRNA-Pro-AGG-1-1,GGCTCGTTGGTCTAGGGGTATGATTCTCGCTTAGGATGCGAGAGGTCCCGGGTTCAAATCCCGGACGAGCCCCCA,Pro-AGG,58;tRNA-Pro-AGG-2-1,GGCTCGTTGGTCTAGGGGTATGATTCTCGCTTAGGGTGCGAGAGGTCCCGGGTTCAAATCCCGGACGAGCCCCCA,Pro-AGG,58;tRNA-Pro-CGG-1-1,GGCTCGTTGGTCTAGGGGTATGATTCTCGCTTCGGGTGCGAGAGGTCCCGGGTTCAAATCCCGGACGAGCCCCCA,Pro-CGG,58;tRNA-Pro-CGG-2-1,GGCTCGTTGGTCTAGGGGTATGATTCTCGCTTCGGGTGTGAGAGGTCCCGGGTTCAAATCCCGGACGAGC…	23	57	114	41	78	113	152	151	108	104	257	135	89.9889	96.329	317.913	166.095	525.936	731.548	475.623	658.17	307.659	674.794	1125.22	263.818
tRF-59:75-Gly-TCC-1-M3	TCCCGGCCAACGCACCA	tRF-3a	-	tRF-17-8SPOL52	17	tRNA-Gly-TCC-1-1,GCGTTGGTGGTATAGTGGTTAGCATAGCTGCCTTCCAAGCAGTTGACCCGGGTTCGATTCCCGGCCAACGCACCA,Gly-TCC,58;tRNA-Gly-TCC-2-1,GCGTTGGTGGTATAGTGGTGAGCATAGCTGCCTTCCAAGCAGTTGACCCGGGTTCGATTCCCGGCCAACGCACCA,Gly-TCC,58;tRNA-Gly-TCC-3-1,GCGTTGGTGGTATAGTGGTAAGCATAGCTGCCTTCCAAGCAGTTGACCCGGGTTCGATTCCCGGCCAACGCACCA,Gly-TCC,58	2	0	1	0	0	0	1	5	1	0	0	0	7.82512	0	2.78871	0	0	0	3.1291	21.7937	2.84869	0	0	0
tRF-58:74-Gly-CCC-1-M2	TCCCGGCCAATGCACCA	tRF-3a	3027a	tRF-17-8SPOX52	17	tRNA-Gly-CCC-1-1,GCATTGGTGGTTCAGTGGTAGAATTCTCGCCTCCCACGCGGGAGACCCGGGTTCAATTCCCGGCCAATGCACCA,Gly-CCC,57;tRNA-Gly-GCC-2-1,GCATTGGTGGTTCAGTGGTAGAATTCTCGCCTGCCACGCGGGAGGCCCGGGTTCGATTCCCGGCCAATGCACCA,Gly-GCC,57	3	7	18	7	0	1	17	0	0	0	1	0	11.7377	11.8299	50.1967	28.3578	0	6.47387	53.1947	0	0	0	4.37828	0
tRF-58:74-Gly-GCC-1	TCCCGGCCCATGCACCA	tRF-3a	3028a	tRF-17-8SP6X52	17	tRNA-Gly-GCC-1-1,GCATGGGTGGTTCAGTGGTAGAATTCTCGCCTGCCACGCGGGAGGCCCGGGTTCGATTCCCGGCCCATGCACCA,Gly-GCC,57	0	1	0	3	48	0	0	2	1	0	1	1	0	1.68998	0	12.1533	323.653	0	0	8.71748	2.84869	0	4.37828	1.95421
tRF-60:76-Arg-TCT-1	TCCCGGCGGAGTCGCCA	tRF-3a	-	-	17	tRNA-Arg-TCT-1-1,GGCTCCGTGGCGCAATGGATAGCGCATTGGACTTCTAATTCAAAGGTTCCGGGTTCGAGTCCCGGCGGAGTCGCCA,Arg-TCT,59	0	0	11	0	0	0	0	0	0	0	0	0	0	0	30.6758	0	0	0	0	0	0	0	0	0
tRF-59:76-Val-CAC-3	TCCCGGGCGGAAACACCA	tRF-3a	-	tRF-18-8S68BFD2	18	tRNA-Val-CAC-3-1,GTTTCCGTAGTGTAGCGGTTATCACATTCGCCTCACACGCGAAAGGTCCCCGGTTCGATCCCGGGCGGAAACACCA,Val-CAC,58	0	0	7	2	0	0	1	12	0	1	0	0	0	0	19.521	8.10222	0	0	3.1291	52.3049	0	6.48841	0	0
tRF-58:74-Gly-CCC-2	TCCCGGGCGGCGCACCA	tRF-3a	-	tRF-17-8S68L52	17	tRNA-Gly-CCC-2-1,GCGCCGCTGGTGTAGTGGTATCATGCAAGATTCCCATTCTTGCGACCCGGGTTCGATTCCCGGGCGGCGCACCA,Gly-CCC,57	0	2	0	5	0	0	3	0	24	0	24	0	0	3.37997	0	20.2555	0	0	9.38729	0	68.3687	0	105.079	0
tRF-59:76-Phe-GAA-1-M4	TCCCGGGTTTCGGCACCA	tRF-3a	-	tRF-18-8SRZMFD2	18	tRNA-Phe-GAA-1-1,GCCGAAATAGCTCAGTTGGGAGAGCGTTAGACTGAAGATCTAAAGGTCCCTGGTTCGATCCCGGGTTTCGGCACCA,Phe-GAA,58;tRNA-Phe-GAA-2-1,GCCGAAATAGCTCAGTTGGGAGAGCGTTAGACTGAAGATCTAAAGGTCCCTGGTTCAATCCCGGGTTTCGGCACCA,Phe-GAA,58;tRNA-Phe-GAA-3-1,GCCGAGATAGCTCAGTTGGGAGAGCGTTAGACTGAAGATCTAAAGGTCCCTGGTTCAATCCCGGGTTTCGGCACCA,Phe-GAA,58;tRNA-Phe-GAA-4-1,GCCGAAATAGCTCAGTTGGGAGAGCGTTAGACCGAAGATCTTAAAGGTCCCTGGTTCAATCCCGGGT…	6	1	0	0	0	0	0	0	1	0	0	0	23.4754	1.68998	0	0	0	0	0	0	2.84869	0	0	0
tRF-59:75-Glu-TTC-2	TCCCGGTGTGGGAACCA	tRF-3a	-	tRF-17-8S746D2	17	tRNA-Glu-TTC-2-1,TCCCACATGGTCTAGCGGTTAGGATTCCTGGTTTTCACCCAGGCGGCCCGGGTTCGACTCCCGGTGTGGGAACCA,Glu-TTC,58	0	6	0	0	0	0	0	16	0	0	0	0	0	10.1399	0	0	0	0	0	69.7399	0	0	0	0
tRF-1:14-Glu-CTC-1-M4	TCCCTGGTGGTCTA	tRF-5a	-	-	14	tRNA-Glu-CTC-1-1,TCCCTGGTGGTCTAGTGGTTAGGATTCGGCGCTCTCACCGCCGCGGCCCGGGTTCGATTCCCGGTCAGGGAACCA,Glu-CTC,0;tRNA-Glu-CTC-2-1,TCCCTGGTGGTCTAGTGGTTAGGATTCGGCGCTCTCACCGCCGCGGCCCGGGTTCGATTCCCGGTCAGGAAACCA,Glu-CTC,0;tRNA-Glu-TTC-3-1,TCCCTGGTGGTCTAGTGGCTAGGATTCGGCGCTTTCACCGCCGCGGCCCGGGTTCGATTCCCGGCCAGGGAACCA,Glu-TTC,0;tRNA-Glu-TTC-4-1,TCCCTGGTGGTCTAGTGGCTAGGATTCGGCGCTTTCACCGCCGCGGCCCGGGTTCGATTCCCGGTCAGGGAAC…	3	2	5	0	0	0	11	0	6	0	0	18	11.7377	3.37997	13.9435	0	0	0	34.4201	0	17.0922	0	0	35.1758
tRF-1:15-Glu-CTC-1-M4	TCCCTGGTGGTCTAG	tRF-5a	-	-	15	tRNA-Glu-CTC-1-1,TCCCTGGTGGTCTAGTGGTTAGGATTCGGCGCTCTCACCGCCGCGGCCCGGGTTCGATTCCCGGTCAGGGAACCA,Glu-CTC,0;tRNA-Glu-CTC-2-1,TCCCTGGTGGTCTAGTGGTTAGGATTCGGCGCTCTCACCGCCGCGGCCCGGGTTCGATTCCCGGTCAGGAAACCA,Glu-CTC,0;tRNA-Glu-TTC-3-1,TCCCTGGTGGTCTAGTGGCTAGGATTCGGCGCTTTCACCGCCGCGGCCCGGGTTCGATTCCCGGCCAGGGAACCA,Glu-TTC,0;tRNA-Glu-TTC-4-1,TCCCTGGTGGTCTAGTGGCTAGGATTCGGCGCTTTCACCGCCGCGGCCCGGGTTCGATTCCCGGTCAGGGAAC…	12	0	1	1	0	0	1	0	0	76	25	0	46.9507	0	2.78871	4.05111	0	0	3.1291	0	0	493.119	109.457	0
tRF-1:16-Glu-CTC-1-M4	TCCCTGGTGGTCTAGT	tRF-5a	-	tRF-16-87R8WPE	16	tRNA-Glu-CTC-1-1,TCCCTGGTGGTCTAGTGGTTAGGATTCGGCGCTCTCACCGCCGCGGCCCGGGTTCGATTCCCGGTCAGGGAACCA,Glu-CTC,0;tRNA-Glu-CTC-2-1,TCCCTGGTGGTCTAGTGGTTAGGATTCGGCGCTCTCACCGCCGCGGCCCGGGTTCGATTCCCGGTCAGGAAACCA,Glu-CTC,0;tRNA-Glu-TTC-3-1,TCCCTGGTGGTCTAGTGGCTAGGATTCGGCGCTTTCACCGCCGCGGCCCGGGTTCGATTCCCGGCCAGGGAACCA,Glu-TTC,0;tRNA-Glu-TTC-4-1,TCCCTGGTGGTCTAGTGGCTAGGATTCGGCGCTTTCACCGCCGCGGCCCGGGTTCGATTCCCGGTCAGGGAAC…	0	2	3	9	0	8	1	51	1	0	0	0	0	3.37997	8.36612	36.46	0	51.791	3.1291	222.296	2.84869	0	0	0
tRF-1:28-Glu-TTC-3-M2	TCCCTGGTGGTCTAGTGGCTAGGATTCG	tRF-5c	-	tRF-28-87R8WP9I1E0K	28	tRNA-Glu-TTC-3-1,TCCCTGGTGGTCTAGTGGCTAGGATTCGGCGCTTTCACCGCCGCGGCCCGGGTTCGATTCCCGGCCAGGGAACCA,Glu-TTC,0;tRNA-Glu-TTC-4-1,TCCCTGGTGGTCTAGTGGCTAGGATTCGGCGCTTTCACCGCCGCGGCCCGGGTTCGATTCCCGGTCAGGGAACCA,Glu-TTC,0	41	5	49	24	1	14	38	62	80	11	42	12	160.415	8.44991	136.647	97.2266	6.74277	90.6342	118.906	270.242	227.896	71.3725	183.888	23.4505
tRF-1:29-Glu-TTC-3-M2	TCCCTGGTGGTCTAGTGGCTAGGATTCGG	tRF-5c	-	tRF-29-87R8WP9I1EJ4	29	tRNA-Glu-TTC-3-1,TCCCTGGTGGTCTAGTGGCTAGGATTCGGCGCTTTCACCGCCGCGGCCCGGGTTCGATTCCCGGCCAGGGAACCA,Glu-TTC,0;tRNA-Glu-TTC-4-1,TCCCTGGTGGTCTAGTGGCTAGGATTCGGCGCTTTCACCGCCGCGGCCCGGGTTCGATTCCCGGTCAGGGAACCA,Glu-TTC,0	168	16	136	46	1	73	87	146	151	17	0	194	657.31	27.0397	379.264	186.351	6.74277	472.593	272.231	636.376	430.153	110.303	0	379.117
tRF-1:30-Glu-TTC-3-M2	TCCCTGGTGGTCTAGTGGCTAGGATTCGGC	tRF-5c	-	tRF-30-87R8WP9I1EWJ	30	tRNA-Glu-TTC-3-1,TCCCTGGTGGTCTAGTGGCTAGGATTCGGCGCTTTCACCGCCGCGGCCCGGGTTCGATTCCCGGCCAGGGAACCA,Glu-TTC,0;tRNA-Glu-TTC-4-1,TCCCTGGTGGTCTAGTGGCTAGGATTCGGCGCTTTCACCGCCGCGGCCCGGGTTCGATTCCCGGTCAGGGAACCA,Glu-TTC,0	138	55	134	47	4	39	60	76	152	13	8	140	539.934	92.9491	373.687	190.402	26.9711	252.481	187.746	331.264	433.002	84.3493	35.0263	273.589
tRF-1:31-Glu-TTC-3-M2	TCCCTGGTGGTCTAGTGGCTAGGATTCGGCG	tRF-5c	-	-	31	tRNA-Glu-TTC-3-1,TCCCTGGTGGTCTAGTGGCTAGGATTCGGCGCTTTCACCGCCGCGGCCCGGGTTCGATTCCCGGCCAGGGAACCA,Glu-TTC,0;tRNA-Glu-TTC-4-1,TCCCTGGTGGTCTAGTGGCTAGGATTCGGCGCTTTCACCGCCGCGGCCCGGGTTCGATTCCCGGTCAGGGAACCA,Glu-TTC,0	485	256	504	124	24	144	356	471	670	45	121	578	1897.59	432.636	1405.51	502.337	161.826	932.238	1113.96	2052.97	1908.63	291.978	529.772	1129.53
tRF-1:32-Glu-TTC-3-M2	TCCCTGGTGGTCTAGTGGCTAGGATTCGGCGC	tRF-5c	-	tRF-32-87R8WP9I1EWJM	32	tRNA-Glu-TTC-3-1,TCCCTGGTGGTCTAGTGGCTAGGATTCGGCGCTTTCACCGCCGCGGCCCGGGTTCGATTCCCGGCCAGGGAACCA,Glu-TTC,0;tRNA-Glu-TTC-4-1,TCCCTGGTGGTCTAGTGGCTAGGATTCGGCGCTTTCACCGCCGCGGCCCGGGTTCGATTCCCGGTCAGGGAACCA,Glu-TTC,0	16	44	20	6	2	3	15	6	30	5	4	66	62.601	74.3592	55.7742	24.3067	13.4855	19.4216	46.9365	26.1525	85.4608	32.442	17.5131	128.978
tiRNA-1:34-Glu-TTC-3-M2	TCCCTGGTGGTCTAGTGGCTAGGATTCGGCGCTT	tiRNA-5	-	tRF-34-87R8WP9I1EWJIQ	34	tRNA-Glu-TTC-3-1,TCCCTGGTGGTCTAGTGGCTAGGATTCGGCGCTTTCACCGCCGCGGCCCGGGTTCGATTCCCGGCCAGGGAACCA,Glu-TTC,0;tRNA-Glu-TTC-4-1,TCCCTGGTGGTCTAGTGGCTAGGATTCGGCGCTTTCACCGCCGCGGCCCGGGTTCGATTCCCGGTCAGGGAACCA,Glu-TTC,0	52	12	42	33	14	14	24	10	19	2	35	84	203.453	20.2798	117.126	133.687	94.3988	90.6342	75.0983	43.5874	54.1252	12.9768	153.24	164.154
tRF-1:23-Glu-CTC-1-M2	TCCCTGGTGGTCTAGTGGTTAGG	tRF-5b	5030b	tRF-23-87R8WP9NY	23	tRNA-Glu-CTC-1-1,TCCCTGGTGGTCTAGTGGTTAGGATTCGGCGCTCTCACCGCCGCGGCCCGGGTTCGATTCCCGGTCAGGGAACCA,Glu-CTC,0;tRNA-Glu-CTC-2-1,TCCCTGGTGGTCTAGTGGTTAGGATTCGGCGCTCTCACCGCCGCGGCCCGGGTTCGATTCCCGGTCAGGAAACCA,Glu-CTC,0	0	0	10	0	0	0	0	0	0	0	27	0	0	0	27.8871	0	0	0	0	0	0	0	118.214	0
tRF-1:28-Glu-CTC-1-M2	TCCCTGGTGGTCTAGTGGTTAGGATTCG	tRF-5c	-	tRF-28-87R8WP9N1E0K	28	tRNA-Glu-CTC-1-1,TCCCTGGTGGTCTAGTGGTTAGGATTCGGCGCTCTCACCGCCGCGGCCCGGGTTCGATTCCCGGTCAGGGAACCA,Glu-CTC,0;tRNA-Glu-CTC-2-1,TCCCTGGTGGTCTAGTGGTTAGGATTCGGCGCTCTCACCGCCGCGGCCCGGGTTCGATTCCCGGTCAGGAAACCA,Glu-CTC,0	1536	1986	2124	596	105	457	1078	1634	1726	189	472	1070	6009.7	3356.31	5923.22	2414.46	707.991	2958.56	3373.17	7122.18	4916.85	1226.31	2066.55	2091
tRF-1:29-Glu-CTC-1-M2	TCCCTGGTGGTCTAGTGGTTAGGATTCGG	tRF-5c	-	tRF-29-87R8WP9N1EJ4	29	tRNA-Glu-CTC-1-1,TCCCTGGTGGTCTAGTGGTTAGGATTCGGCGCTCTCACCGCCGCGGCCCGGGTTCGATTCCCGGTCAGGGAACCA,Glu-CTC,0;tRNA-Glu-CTC-2-1,TCCCTGGTGGTCTAGTGGTTAGGATTCGGCGCTCTCACCGCCGCGGCCCGGGTTCGATTCCCGGTCAGGAAACCA,Glu-CTC,0	2535	2214	2631	838	117	571	1619	2422	2497	174	744	1188	9918.34	3741.62	7337.09	3394.83	788.904	3696.58	5066.01	10556.9	7113.19	1128.98	3257.44	2321.6
tRF-1:30-Glu-CTC-1-M2	TCCCTGGTGGTCTAGTGGTTAGGATTCGGC	tRF-5c	-	tRF-30-87R8WP9N1EWJ	30	tRNA-Glu-CTC-1-1,TCCCTGGTGGTCTAGTGGTTAGGATTCGGCGCTCTCACCGCCGCGGCCCGGGTTCGATTCCCGGTCAGGGAACCA,Glu-CTC,0;tRNA-Glu-CTC-2-1,TCCCTGGTGGTCTAGTGGTTAGGATTCGGCGCTCTCACCGCCGCGGCCCGGGTTCGATTCCCGGTCAGGAAACCA,Glu-CTC,0	6613	11894	6298	1529	506	921	4017	1854	7702	242	1040	4642	25873.8	20100.7	17563.3	6194.15	3411.84	5962.44	12569.6	8081.11	21940.6	1570.19	4553.42	9071.44
tRF-1:31-Glu-CTC-1-M2	TCCCTGGTGGTCTAGTGGTTAGGATTCGGCG	tRF-5c	5030c	tRF-31-87R8WP9N1EWJ0	31	tRNA-Glu-CTC-1-1,TCCCTGGTGGTCTAGTGGTTAGGATTCGGCGCTCTCACCGCCGCGGCCCGGGTTCGATTCCCGGTCAGGGAACCA,Glu-CTC,0;tRNA-Glu-CTC-2-1,TCCCTGGTGGTCTAGTGGTTAGGATTCGGCGCTCTCACCGCCGCGGCCCGGGTTCGATTCCCGGTCAGGAAACCA,Glu-CTC,0	25555	66238	26174	4254	996	4292	21364	10123	37124	1827	2559	26882	99985.5	111941	72991.6	17233.4	6715.8	27785.9	66850	44123.5	105755	11854.3	11204	52533
tRF-1:32-Glu-CTC-1-M2	TCCCTGGTGGTCTAGTGGTTAGGATTCGGCGC	tRF-5c	-	tRF-32-87R8WP9N1EWJM	32	tRNA-Glu-CTC-1-1,TCCCTGGTGGTCTAGTGGTTAGGATTCGGCGCTCTCACCGCCGCGGCCCGGGTTCGATTCCCGGTCAGGGAACCA,Glu-CTC,0;tRNA-Glu-CTC-2-1,TCCCTGGTGGTCTAGTGGTTAGGATTCGGCGCTCTCACCGCCGCGGCCCGGGTTCGATTCCCGGTCAGGAAACCA,Glu-CTC,0	3411	11094	6112	1592	503	532	3387	1518	6230	810	1752	15581	13345.7	18748.7	17044.6	6449.37	3391.61	3444.1	10598.3	6616.57	17747.4	5255.61	7670.75	30448.5
tiRNA-1:34-Glu-CTC-1-M2	TCCCTGGTGGTCTAGTGGTTAGGATTCGGCGCTC	tiRNA-5	-	tRF-34-87R8WP9N1EWJI5	34	tRNA-Glu-CTC-1-1,TCCCTGGTGGTCTAGTGGTTAGGATTCGGCGCTCTCACCGCCGCGGCCCGGGTTCGATTCCCGGTCAGGGAACCA,Glu-CTC,0;tRNA-Glu-CTC-2-1,TCCCTGGTGGTCTAGTGGTTAGGATTCGGCGCTCTCACCGCCGCGGCCCGGGTTCGATTCCCGGTCAGGAAACCA,Glu-CTC,0	308	100	345	200	74	206	219	262	255	48	904	1312	1205.07	168.998	962.104	810.222	498.965	1333.62	685.272	1141.99	726.417	311.444	3957.97	2563.92
tRF-60:76-Lys-TTT-3-M2	TCCCTGTTCGGGCGCCA	tRF-3a	3006a	tRF-17-877S6V2	17	tRNA-Lys-TTT-3-1,GCCCGGATAGCTCAGTCGGTAGAGCATCAGACTTTTAATCTGAGGGTCCAGGGTTCAAGTCCCTGTTCGGGCGCCA,Lys-TTT,59;tRNA-Lys-TTT-5-1,GCCCGGATAGCTCAGTCGGTAGAGCATCAGACTTTTAATCTGAGGGTCCGGGGTTCAAGTCCCTGTTCGGGCGCCA,Lys-TTT,59	5	1	1	23	0	16	27	0	0	19	36	0	19.5628	1.68998	2.78871	93.1755	0	103.582	84.4856	0	0	123.28	157.618	0
tRF-60:76-Tyr-GTA-1-M5	TCCGGCTCGAAGGACCA	tRF-3a	-	tRF-17-884U1D2	17	tRNA-Tyr-GTA-1-1,CCTTCGATAGCTCAGTTGGTAGAGCGGAGGACTGTAGATCCTTAGGTCGCTGGTTCGAATCCGGCTCGAAGGACCA,Tyr-GTA,59;tRNA-Tyr-GTA-2-1,CCTTCGATAGCTCAGTTGGTAGAGCGGAGGACTGTAGATCCTTAGGTCGCTGGTTCGATTCCGGCTCGAAGGACCA,Tyr-GTA,59;tRNA-Tyr-GTA-5-1,CCTTCGATAGCTCAGCTGGTAGAGCGGAGGACTGTAGATCCTTAGGTCGCTGGTTCGATTCCGGCTCGAAGGACCA,Tyr-GTA,59;tRNA-Tyr-GTA-7-1,CCTTCGATAGCTCAGCTGGTAGAGCGGAGGACTGTAGATCCTTAGGTCGCTGGTTCAATTCCGGCTC…	47	90	189	134	206	170	584	178	244	235	232	354	183.89	152.098	527.066	542.849	1389.01	1100.56	1827.39	775.856	695.081	1524.78	1015.76	691.79
tRF-60:76-Tyr-GTA-3-M2	TCCGGCTCGGAGGACCA	tRF-3a	3031a	tRF-17-88481D2	17	tRNA-Tyr-GTA-3-1,CCTTCGATAGCTCAGTTGGTAGAGCGGAGGACTGTAGATCCTTAGGTCGCTGGTTCGAATCCGGCTCGGAGGACCA,Tyr-GTA,59;tRNA-Tyr-GTA-6-1,CCTTCGATAGCTCAGCTGGTAGAGCGGAGGACTGTAGATCCTTAGGTCGCTGGTTCGAATCCGGCTCGGAGGACCA,Tyr-GTA,59	24	36	58	53	61	37	173	88	25	39	3	16	93.9015	60.8394	161.745	214.709	411.309	239.533	541.334	383.569	71.2174	253.048	13.1349	31.2673
tRF-59:75-Cys-GCA-17	TCCGGGTGCCCCCCCCA	tRF-3a	-	-	17	tRNA-Cys-GCA-17-1,GGGGATATAGCTCAGGGGTAGAGCATTTGACTGCAGATCAAGAGGTCCCCGGTTCAAATCCGGGTGCCCCCCCCA,Cys-GCA,58	0	0	0	0	0	0	0	28	0	0	0	0	0	0	0	0	0	0	0	122.045	0	0	0	0
tRF-59:75-Cys-GCA-11-M7	TCCGGGTGCCCCCTCCA	tRF-3a	3003a	tRF-17-8871K92	17	tRNA-Cys-GCA-11-1,GGGGGTATAGCTTAGCGGTAGAGCATTTGACTGCAGATCAAGAGGTCCCCGGTTCAAATCCGGGTGCCCCCTCCA,Cys-GCA,58;tRNA-Cys-GCA-14-1,GGGGGTATAGCTCAGGGGTAGAGCATTTGACTGCAGATCAAGAAGTCCCCGGTTCAAATCCGGGTGCCCCCTCCA,Cys-GCA,58;tRNA-Cys-GCA-2-1,GGGGGTATAGCTCAGTGGTAGAGCATTTGACTGCAGATCAAGAGGTCCCCGGTTCAAATCCGGGTGCCCCCTCCA,Cys-GCA,58;tRNA-Cys-GCA-4-1,GGGGGTATAGCTCAGTGGTAGAGCATTTGACTGCAGATCAAGAGGTCCCTGGTTCAAATCCGGGTGCC…	2	5	8	28	50	20	33	37	19	0	27	46	7.82512	8.44991	22.3097	113.431	337.139	129.477	103.26	161.273	54.1252	0	118.214	89.8936
tRF-60:77-Ile-TAT-1	TCCTCACCTGGAGCACCA	tRF-3a	-	-	18	tRNA-Ile-TAT-1-1,GCTCCAGTGGCGCAATCGGTTAGCGCGCGGTACTTATAATGCCGAGGTTGTGAGTTCGATCCTCACCTGGAGCACCA,Ile-TAT,59	0	4	0	0	0	0	0	28	0	0	0	0	0	6.75993	0	0	0	0	0	122.045	0	0	0	0
tRF-59:76-Thr-TGT-2	TCCTCGCTGGGGCCTCCA	tRF-3a	-	-	18	tRNA-Thr-TGT-2-1,GGCTCCATAGCTCAGTGGTTAGAGCACTGGTCTTGTAAACCAGGGGTCGCGAGTTCGATCCTCGCTGGGGCCTCCA,Thr-TGT,58	0	0	0	1	0	0	21	2	0	0	0	0	0	0	0	4.05111	0	0	65.711	8.71748	0	0	0	0
tRF-1:16-Asp-GTC-1-M3	TCCTCGTTAGTATAGT	tRF-5a	-	-	16	tRNA-Asp-GTC-1-1,TCCTCGTTAGTATAGTGGTTAGTATCCCCGCCTGTCACGCGGGAGACCGGGGTTCAATTCCCCGACGGGGAGCCA,Asp-GTC,0;tRNA-Asp-GTC-2-1,TCCTCGTTAGTATAGTGGTGAGTATCCCCGCCTGTCACGCGGGAGACCGGGGTTCGATTCCCCGACGGGGAGCCA,Asp-GTC,0;tRNA-Asp-GTC-3-1,TCCTCGTTAGTATAGTGGTGAGTGTCCCCGTCTGTCACGCGGGAGACCGGGGTTCGATTCCCCGACGGGGAGCCA,Asp-GTC,0	2	2	54	13	0	0	1	0	0	0	0	0	7.82512	3.37997	150.59	52.6644	0	0	3.1291	0	0	0	0	0
tRF-1:23-Asp-GTC-2-M2	TCCTCGTTAGTATAGTGGTGAGT	tRF-5b	5032b	tRF-23-897PVP94Z	23	tRNA-Asp-GTC-2-1,TCCTCGTTAGTATAGTGGTGAGTATCCCCGCCTGTCACGCGGGAGACCGGGGTTCGATTCCCCGACGGGGAGCCA,Asp-GTC,0;tRNA-Asp-GTC-3-1,TCCTCGTTAGTATAGTGGTGAGTGTCCCCGTCTGTCACGCGGGAGACCGGGGTTCGATTCCCCGACGGGGAGCCA,Asp-GTC,0	1	0	0	0	0	8	0	0	0	0	0	0	3.91256	0	0	0	0	51.791	0	0	0	0	0	0
tRF-1:28-Asp-GTC-2	TCCTCGTTAGTATAGTGGTGAGTATCCC	tRF-5c	-	tRF-28-897PVP941QDJ	28	tRNA-Asp-GTC-2-1,TCCTCGTTAGTATAGTGGTGAGTATCCCCGCCTGTCACGCGGGAGACCGGGGTTCGATTCCCCGACGGGGAGCCA,Asp-GTC,0	1	0	4	0	0	0	0	3	0	1	44	0	3.91256	0	11.1548	0	0	0	0	13.0762	0	6.48841	192.644	0
tRF-1:29-Asp-GTC-2	TCCTCGTTAGTATAGTGGTGAGTATCCCC	tRF-5c	-	tRF-29-897PVP941Q1J	29	tRNA-Asp-GTC-2-1,TCCTCGTTAGTATAGTGGTGAGTATCCCCGCCTGTCACGCGGGAGACCGGGGTTCGATTCCCCGACGGGGAGCCA,Asp-GTC,0	7	0	2	0	5	2	7	17	13	1	0	46	27.3879	0	5.57742	0	33.7139	12.9477	21.9037	74.0986	37.033	6.48841	0	89.8936
tRF-1:32-Asp-GTC-2	TCCTCGTTAGTATAGTGGTGAGTATCCCCGCC	tRF-5c	5032c	-	32	tRNA-Asp-GTC-2-1,TCCTCGTTAGTATAGTGGTGAGTATCCCCGCCTGTCACGCGGGAGACCGGGGTTCGATTCCCCGACGGGGAGCCA,Asp-GTC,0	4	0	1	0	1	6	3	3	5	2	0	1	15.6502	0	2.78871	0	6.74277	38.8432	9.38729	13.0762	14.2435	12.9768	0	1.95421
tiRNA-1:34-Asp-GTC-2	TCCTCGTTAGTATAGTGGTGAGTATCCCCGCCTG	tiRNA-5	-	tRF-34-897PVP941QKS1P	34	tRNA-Asp-GTC-2-1,TCCTCGTTAGTATAGTGGTGAGTATCCCCGCCTGTCACGCGGGAGACCGGGGTTCGATTCCCCGACGGGGAGCCA,Asp-GTC,0	6	0	2	0	0	10	9	11	17	2	1	52	23.4754	0	5.57742	0	0	64.7387	28.1619	47.9462	48.4278	12.9768	4.37828	101.619
tRF-1:28-Asp-GTC-1	TCCTCGTTAGTATAGTGGTTAGTATCCC	tRF-5c	-	-	28	tRNA-Asp-GTC-1-1,TCCTCGTTAGTATAGTGGTTAGTATCCCCGCCTGTCACGCGGGAGACCGGGGTTCAATTCCCCGACGGGGAGCCA,Asp-GTC,0	0	0	0	0	0	0	5	0	1	0	42	0	0	0	0	0	0	0	15.6455	0	2.84869	0	183.888	0
tRF-1:29-Asp-GTC-1	TCCTCGTTAGTATAGTGGTTAGTATCCCC	tRF-5c	-	-	29	tRNA-Asp-GTC-1-1,TCCTCGTTAGTATAGTGGTTAGTATCCCCGCCTGTCACGCGGGAGACCGGGGTTCAATTCCCCGACGGGGAGCCA,Asp-GTC,0	0	0	0	0	0	0	0	5	0	0	0	0	0	0	0	0	0	0	0	21.7937	0	0	0	0
tRF-69:85-Ser-AGA-1-M6	TCCTGCCGACTACGCCA	tRF-3a	-	tRF-17-8Y3DUV2	17	tRNA-Ser-AGA-1-1,GTAGTCGTGGCCGAGTGGTTAAGGCGATGGACTAGAAATCCATTGGGGTTTCCCCGCGCAGGTTCGAATCCTGCCGACTACGCCA,Ser-AGA,68;tRNA-Ser-AGA-2-1,GTAGTCGTGGCCGAGTGGTTAAGGCGATGGACTAGAAATCCATTGGGGTCTCCCCGCGCAGGTTCGAATCCTGCCGACTACGCCA,Ser-AGA,68;tRNA-Ser-AGA-3-1,GTAGTCGTGGCCGAGTGGTTAAGGCGATGGACTAGAAATCCATTGGGGTTTCCCCACGCAGGTTCGAATCCTGCCGACTACGCCA,Ser-AGA,68;tRNA-Ser-AGA-4-1,GTAGTCGTGGCCGAGTGGTTAAGGTGATGGACTAGAAACC…	0	0	0	5	0	1	10	0	16	0	1	1	0	0	0	20.2555	0	6.47387	31.291	0	45.5791	0	4.37828	1.95421
tRF-60:76-Arg-ACG-1-M2	TCCTGGCTGGCTCGCCA	tRF-3a	-	tRF-17-8YQ84V2	17	tRNA-Arg-ACG-1-1,GGGCCAGTGGCGCAATGGATAACGCGTCTGACTACGGATCAGAAGATTCCAGGTTCGACTCCTGGCTGGCTCGCCA,Arg-ACG,59;tRNA-Arg-ACG-2-1,GGGCCAGTGGCGCAATGGATAACGCGTCTGACTACGGATCAGAAGATTCTAGGTTCGACTCCTGGCTGGCTCGCCA,Arg-ACG,59	13	8	36	8	36	14	42	6	23	67	1	14	50.8633	13.5199	100.393	32.4089	242.74	90.6342	131.422	26.1525	65.52	434.723	4.37828	27.3589
tRF-69:85-Ser-TGA-4	TCCTGTCGGCTACGCCA	tRF-3a	-	tRF-17-8YWJUV2	17	tRNA-Ser-TGA-4-1,GTAGTCGTGGCCGAGTGGTTAAGGCGATGGACTTGAAATCCATTGGGGTTTCCCCGCGCAGGTTCGAATCCTGTCGGCTACGCCA,Ser-TGA,68	2	0	4	0	28	8	80	2	13	0	1	1	7.82512	0	11.1548	0	188.798	51.791	250.328	8.71748	37.033	0	4.37828	1.95421
tRF-69:85-Ser-CGA-4	TCCTGTTCGTGACGCCA	tRF-3a	-	tRF-17-8YYWOV2	17	tRNA-Ser-CGA-4-1,GTCACGGTGGCCGAGTGGTTAAGGCGTTGGACTCGAAATCCAATGGGGTTTCCCCGCACAGGTTCGAATCCTGTTCGTGACGCCA,Ser-CGA,68	0	0	22	0	83	0	55	33	1	67	24	39	0	0	61.3516	0	559.65	0	172.1	143.838	2.84869	434.723	105.079	76.2142
tRF-54:75-iMet-CAT-1	TCGAAACCATCCTCTGCTACCA	tRF-3b	-	tRF-22-WB0Q37Q52	22	tRNA-iMet-CAT-1-1,AGCAGAGTGGCGCAGCGGAAGCGTGCTGGGCCCATAACCCAGAGGTCGATGGATCGAAACCATCCTCTGCTACCA,iMet-CAT,53	0	1	24	0	1	45	1	1	35	51	0	74	0	1.68998	66.929	0	6.74277	291.324	3.1291	4.35874	99.7043	330.909	0	144.611
tRF-55:76-Val-AAC-1-M5	TCGAAACCGGGCGGAAACACCA	tRF-3b	3008b	tRF-22-WB08Q2B52	22	tRNA-Val-AAC-1-1,GTTTCCGTAGTGTAGTGGTTATCACGTTCGCCTAACACGCGAAAGGTCCCCGGTTCGAAACCGGGCGGAAACACCA,Val-AAC,54;tRNA-Val-AAC-2-1,GTTTCCGTAGTGTAGTGGTCATCACGTTCGCCTAACACGCGAAAGGTCCCCGGTTCGAAACCGGGCGGAAACACCA,Val-AAC,54;tRNA-Val-AAC-4-1,GTTTCCGTAGTGTAGTGGTTATCACGTTCGCCTAACACGCGAAAGGTCCGCGGTTCGAAACCGGGCGGAAACACCA,Val-AAC,54;tRNA-Val-CAC-1-1,GTTTCCGTAGTGTAGTGGTTATCACGTTCGCCTCACACGCGAAAGGTCCCCGGTTCGAAACCGGGCG…	2	6	54	16	9	8	22	18	16	24	103	1	7.82512	10.1399	150.59	64.8177	60.6849	51.791	68.8401	78.4574	45.5791	155.722	450.963	1.95421
tRF-65:86-Leu-TAA-3	TCGAACCCCACTTCTGGTACCA	tRF-3b	-	-	22	tRNA-Leu-TAA-3-1,ACCAGAATGGCCGAGTGGTTAAGGCGTTGGACTTAAGATCCAATGGATTCATATCCGCGTGGGTTCGAACCCCACTTCTGGTACCA,Leu-TAA,64	0	0	0	0	17	0	0	0	0	36	0	0	0	0	0	0	114.627	0	0	0	0	233.583	0	0
tRF-54:75-Trp-CCA-4	TCGAATCACGTCGGGGTCACCA	tRF-3b	-	tRF-22-WB8HWKS52	22	tRNA-Trp-CCA-4-1,GACCTCGTGGCGCAACGGTAGCGCGTCTGACTCCAGATCAGAAGGCTGCGTGTTCGAATCACGTCGGGGTCACCA,Trp-CCA,53	0	3	8	0	0	13	25	0	0	16	36	0	0	5.06995	22.3097	0	0	84.1604	78.2274	0	0	103.815	157.618	0
tRF-64:85-Leu-AAG-1-M4	TCGAATCCCACCGCTGCCACCA	tRF-3b	-	tRF-22-WB863IP52	22	tRNA-Leu-AAG-1-1,GGTAGCGTGGCCGAGCGGTCTAAGGCGCTGGATTAAGGCTCCAGTCTCTTCGGAGGCGTGGGTTCGAATCCCACCGCTGCCACCA,Leu-AAG,63;tRNA-Leu-AAG-2-1,GGTAGCGTGGCCGAGCGGTCTAAGGCGCTGGATTAAGGCTCCAGTCTCTTCGGGGGCGTGGGTTCGAATCCCACCGCTGCCACCA,Leu-AAG,63;tRNA-Leu-TAG-1-1,GGTAGCGTGGCCGAGCGGTCTAAGGCGCTGGATTTAGGCTCCAGTCTCTTCGGAGGCGTGGGTTCGAATCCCACCGCTGCCACCA,Leu-TAG,63;tRNA-Leu-TAG-3-1,GGTAGCGTGGCCGAGTGGTCTAAGGCGCTGGATTTAGGCT…	0	0	0	0	0	0	0	13	1	0	0	1	0	0	0	0	0	0	0	56.6636	2.84869	0	0	1.95421
tRF-65:86-Leu-CAG-1	TCGAATCCCACTCCTGACACCA	tRF-3b	3011b	tRF-22-WB8647O52	22	tRNA-Leu-CAG-1-1,GTCAGGATGGCCGAGCGGTCTAAGGCGCTGCGTTCAGGTCGCAGTCTCCCCTGGAGGCGTGGGTTCGAATCCCACTCCTGACACCA,Leu-CAG,64	4	0	4	7	2	22	3	16	0	1	0	1	15.6502	0	11.1548	28.3578	13.4855	142.425	9.38729	69.7399	0	6.48841	0	1.95421
tRF-65:86-Leu-CAA-1-M5	TCGAATCCCACTTCTGACACCA	tRF-3b	3012b	tRF-22-WB86N7O52	22	tRNA-Leu-CAA-1-1,GTCAGGATGGCCGAGTGGTCTAAGGCGCCAGACTCAAGTTCTGGTCTCCAATGGAGGCGTGGGTTCGAATCCCACTTCTGACACCA,Leu-CAA,64;tRNA-Leu-CAA-2-1,GTCAGGATGGCCGAGTGGTCTAAGGCGCCAGACTCAAGTTCTGGTCTCCGTATGGAGGCGTGGGTTCGAATCCCACTTCTGACACCA,Leu-CAA,65;tRNA-Leu-CAA-3-1,GTCAGGATGGCCGAGTGGTCTAAGGCGCCAGACTCAAGTTCTGGTCTCCGCATGGAGGCGTGGGTTCGAATCCCACTTCTGACACCA,Leu-CAA,65;tRNA-Leu-CAA-4-1,GTCAGGATGGCCGAGTGGTCTAAGGCGCCAGACTC…	1	19	26	3	40	32	1	43	2	105	0	63	3.91256	32.1097	72.5064	12.1533	269.711	207.164	3.1291	187.426	5.69739	681.283	0	123.115
tRF-56:77-Thr-AGT-2-M3	TCGAATCCCAGCGGGGCCTCCA	tRF-3b	-	tRF-22-WB86QKP92	22	tRNA-Thr-AGT-2-1,GGCTCCGTGGCTTAGCTGGTTAAAGCGCCTGTCTAGTAAACAGGAGATCCTGGGTTCGAATCCCAGCGGGGCCTCCA,Thr-AGT,55;tRNA-Thr-AGT-6-1,GGCCCTGTGGCTTAGCTGGTCAAAGCGCCTGTCTAGTAAACAGGAGATCCTGGGTTCGAATCCCAGCGGGGCCTCCA,Thr-AGT,55;tRNA-Thr-CGT-3-1,GGCTCTGTGGCTTAGTTGGCTAAAGCGCCTGTCTCGTAAACAGGAGATCCTGGGTTCGAATCCCAGCGGGGCCTCCA,Thr-CGT,55	0	0	0	0	0	0	0	0	8	0	0	0	0	0	0	0	0	0	0	0	22.7896	0	0	0
tRF-56:77-Thr-AGT-1-M2	TCGAATCCCAGCGGTGCCTCCA	tRF-3b	-	tRF-22-WB86Q3P92	22	tRNA-Thr-AGT-1-1,GGCGCCGTGGCTTAGTTGGTTAAAGCGCCTGTCTAGTAAACAGGAGATCCTGGGTTCGAATCCCAGCGGTGCCTCCA,Thr-AGT,55;tRNA-Thr-AGT-5-1,GGCGCCGTGGCTTAGCTGGTTAAAGCGCCTGTCTAGTAAACAGGAGATCCTGGGTTCGAATCCCAGCGGTGCCTCCA,Thr-AGT,55	5	3	0	11	0	0	0	1	0	20	0	1	19.5628	5.06995	0	44.5622	0	0	0	4.35874	0	129.768	0	1.95421
tRF-64:85-Ser-GCT-3-M4	TCGAATCCCATCCTCGTCGCCA	tRF-3b	-	tRF-22-WB8689SV2	22	tRNA-Ser-GCT-3-1,GACGAGGTGGCCGAGTGGTTAAGGCGATGGACTGCTAATCCATTGTGCTTTGCACGCGTGGGTTCGAATCCCATCCTCGTCGCCA,Ser-GCT,63;tRNA-Ser-GCT-4-1,GACGAGGTGGCCGAGTGGTTAAGGCGATGGACTGCTAATCCATTGTGCTCTGCACGCGTGGGTTCGAATCCCATCCTCGTCGCCA,Ser-GCT,63;tRNA-Ser-GCT-5-1,GACGAGGTGGCCGAGTGGTTAAGGCGATGGACTGCTAATCCATTGTGCTCTGCACACGTGGGTTCGAATCCCATCCTCGTCGCCA,Ser-GCT,63;tRNA-Ser-GCT-6-1,GGAGAGGCCTGGCCGAGTGGTTAAGGCGATGGACTGCTAA…	0	0	9	0	0	2	0	1	0	0	24	0	0	0	25.0984	0	0	12.9477	0	4.35874	0	0	105.079	0
tRF-54:75-His-GTG-1-M2	TCGAATCCGAGTCACGGCACCA	tRF-3b	3013b	tRF-22-WB8US5652	22	tRNA-His-GTG-1-1,GCCGTGATCGTATAGTGGTTAGTACTCTGCGTTGTGGCCGCAGCAACCTCGGTTCGAATCCGAGTCACGGCACCA,His-GTG,53;tRNA-His-GTG-2-1,GCCATGATCGTATAGTGGTTAGTACTCTGCGCTGTGGCCGCAGCAACCTCGGTTCGAATCCGAGTCACGGCACCA,His-GTG,53	0	0	4	0	0	1	0	33	1	1	0	0	0	0	11.1548	0	0	6.47387	0	143.838	2.84869	6.48841	0	0
tRF-55:76-Tyr-GTA-1-M2	TCGAATCCGGCTCGAAGGACCA	tRF-3b	-	tRF-22-WB884U1D2	22	tRNA-Tyr-GTA-1-1,CCTTCGATAGCTCAGTTGGTAGAGCGGAGGACTGTAGATCCTTAGGTCGCTGGTTCGAATCCGGCTCGAAGGACCA,Tyr-GTA,54;tRNA-Tyr-GTA-8-1,CTTTCGATAGCTCAGTTGGTAGAGCGGAGGACTGTAGATCCTTAGGTCGCTGGTTCGAATCCGGCTCGAAGGACCA,Tyr-GTA,54	4	0	14	11	31	25	2	21	3	58	57	0	15.6502	0	39.0419	44.5622	209.026	161.847	6.25819	91.5336	8.54608	376.328	249.562	0
tRF-55:76-Tyr-GTA-3-M2	TCGAATCCGGCTCGGAGGACCA	tRF-3b	-	tRF-22-WB88481D2	22	tRNA-Tyr-GTA-3-1,CCTTCGATAGCTCAGTTGGTAGAGCGGAGGACTGTAGATCCTTAGGTCGCTGGTTCGAATCCGGCTCGGAGGACCA,Tyr-GTA,54;tRNA-Tyr-GTA-6-1,CCTTCGATAGCTCAGCTGGTAGAGCGGAGGACTGTAGATCCTTAGGTCGCTGGTTCGAATCCGGCTCGGAGGACCA,Tyr-GTA,54	11	1	0	5	0	0	0	15	0	2	0	2	43.0382	1.68998	0	20.2555	0	0	0	65.3811	0	12.9768	0	3.90842
tRF-64:85-Ser-CGA-1	TCGAATCCTGCTCACAGCGCCA	tRF-3b	-	tRF-22-WB8Y45FV2	22	tRNA-Ser-CGA-1-1,GCTGTGATGGCCGAGTGGTTAAGGCGTTGGACTCGAAATCCAATGGGGTCTCCCCGCGCAGGTTCGAATCCTGCTCACAGCGCCA,Ser-CGA,63	0	5	0	0	0	0	0	0	9	0	0	0	0	8.44991	0	0	0	0	0	0	25.6382	0	0	0
tRF-54:75-Gln-TTG-2	TCGAATCTCGGTGGGACCTCCA	tRF-3b	-	-	22	tRNA-Gln-TTG-2-1,GGTCCCATGGTGTAATGGTTAGCACTCTGGACTTTGAATCCAGCAATCCGAGTTCGAATCTCGGTGGGACCTCCA,Gln-TTG,53	2	0	1	5	0	1	0	1	1	0	0	0	7.82512	0	2.78871	20.2555	0	6.47387	0	4.35874	2.84869	0	0	0
tRF-54:75-Ala-CGC-4	TCGACCCCCGGCTCCTCCACCA	tRF-3b	-	-	22	tRNA-Ala-CGC-4-1,GGGGGTGTAGCTCAGTGGTAGAGCGCGTGCTTCGCATGTACGAGGCCCCGGGTTCGACCCCCGGCTCCTCCACCA,Ala-CGC,53	0	0	0	0	3	0	0	0	0	0	0	0	0	0	0	0	20.2283	0	0	0	0	0	0	0
tRF-54:75-Glu-TTC-1	TCGACTCCCGGTATGGGAACCA	tRF-3b	-	-	22	tRNA-Glu-TTC-1-1,TCCCATATGGTCTAGCGGTTAGGATTCCTGGTTTTCACCCAGGTGGCCCGGGTTCGACTCCCGGTATGGGAACCA,Glu-TTC,53	0	0	12	0	0	0	8	0	0	0	20	0	0	0	33.4645	0	0	0	25.0328	0	0	0	87.5657	0
tRF-54:75-Glu-TTC-2	TCGACTCCCGGTGTGGGAACCA	tRF-3b	3015b	tRF-22-WD8S746D2	22	tRNA-Glu-TTC-2-1,TCCCACATGGTCTAGCGGTTAGGATTCCTGGTTTTCACCCAGGCGGCCCGGGTTCGACTCCCGGTGTGGGAACCA,Glu-TTC,53	0	1	20	3	0	1	0	0	0	19	0	2	0	1.68998	55.7742	12.1533	0	6.47387	0	0	0	123.28	0	3.90842
tRF-55:76-Arg-ACG-1-M2	TCGACTCCTGGCTGGCTCGCCA	tRF-3b	-	tRF-22-WD8YQ84V2	22	tRNA-Arg-ACG-1-1,GGGCCAGTGGCGCAATGGATAACGCGTCTGACTACGGATCAGAAGATTCCAGGTTCGACTCCTGGCTGGCTCGCCA,Arg-ACG,54;tRNA-Arg-ACG-2-1,GGGCCAGTGGCGCAATGGATAACGCGTCTGACTACGGATCAGAAGATTCTAGGTTCGACTCCTGGCTGGCTCGCCA,Arg-ACG,54	45	9	62	30	68	36	24	34	37	92	6	61	176.065	15.2098	172.9	121.533	458.508	233.059	75.0983	148.197	105.402	596.934	26.2697	119.207
tRF-+1:T30-Arg-CCT-2	TCGAGAGGGGCTGTGCTCGCAAGGTTTCTT	tRF-1	-	-	30	pre_tRNA-Arg-CCT-2-1,AACACCTATCAAGGAGCACGTGGGTTTAGCGTCTTACCGCGCCCCAGTGGCCTAATGGATAAGGCACTGGCCTCCTAAGCCAGGGATTGTGGGTTCGAGTCCCACCTGGGGTGTCGAGAGGGGCTGTGCTCGCAAGGTTTCTTTTGGTGCCGG,Arg-CCT,113	10	0	14	7	2	3	3	5	4	6	0	0	39.1256	0	39.0419	28.3578	13.4855	19.4216	9.38729	21.7937	11.3948	38.9305	0	0
tRF-+1:T31-Arg-CCT-2	TCGAGAGGGGCTGTGCTCGCAAGGTTTCTTT	tRF-1	1039	-	31	pre_tRNA-Arg-CCT-2-1,AACACCTATCAAGGAGCACGTGGGTTTAGCGTCTTACCGCGCCCCAGTGGCCTAATGGATAAGGCACTGGCCTCCTAAGCCAGGGATTGTGGGTTCGAGTCCCACCTGGGGTGTCGAGAGGGGCTGTGCTCGCAAGGTTTCTTTTGGTGCCGG,Arg-CCT,113	100	21	86	102	19	71	52	54	65	3	1	115	391.256	35.4896	239.829	413.213	128.113	459.645	162.713	235.372	185.165	19.4652	4.37828	224.734
tRF-+1:T32-Arg-CCT-2	TCGAGAGGGGCTGTGCTCGCAAGGTTTCTTTT	tRF-1	-	-	32	pre_tRNA-Arg-CCT-2-1,AACACCTATCAAGGAGCACGTGGGTTTAGCGTCTTACCGCGCCCCAGTGGCCTAATGGATAAGGCACTGGCCTCCTAAGCCAGGGATTGTGGGTTCGAGTCCCACCTGGGGTGTCGAGAGGGGCTGTGCTCGCAAGGTTTCTTTTGGTGCCGG,Arg-CCT,113	4	3	3	2	0	0	2	1	1	0	30	48	15.6502	5.06995	8.36612	8.10222	0	0	6.25819	4.35874	2.84869	0	131.349	93.802
tRF-55:76-Val-TAC-1-M2	TCGAGCCCCAGTGGAACCACCA	tRF-3b	3017b	tRF-22-W0K672052	22	tRNA-Val-TAC-1-1,GGTTCCATAGTGTAGTGGTTATCACGTCTGCTTTACACGCAGAAGGTCCTGGGTTCGAGCCCCAGTGGAACCACCA,Val-TAC,54;tRNA-Val-TAC-2-1,GGTTCCATAGTGTAGCGGTTATCACGTCTGCTTTACACGCAGAAGGTCCTGGGTTCGAGCCCCAGTGGAACCACCA,Val-TAC,54	24	28	38	55	51	27	73	55	15	55	25	2	93.9015	47.3195	105.971	222.811	343.881	174.795	228.424	239.731	42.7304	356.862	109.457	3.90842
tRF-55:76-Arg-CCG-2	TCGAGTCCCATCTGGGTCGCCA	tRF-3b	-	-	22	tRNA-Arg-CCG-2-1,GACCCAGTGGCCTAATGGATAAGGCATCAGCCTCCGGAGCTGGGGATTGTGGGTTCGAGTCCCATCTGGGTCGCCA,Arg-CCG,54	0	0	0	0	0	0	0	5	0	0	0	0	0	0	0	0	0	0	0	21.7937	0	0	0	0
tRF-54:75-Ala-AGC-4	TCGATCCCCAGCATCTCCACCA	tRF-3b	-	tRF-22-WEK6PM852	22	tRNA-Ala-AGC-4-1,GGGGATGTAGCTCAGTGGTAGAGCGCATGCTTAGCATGCATGAGGTCCCGGGTTCGATCCCCAGCATCTCCACCA,Ala-AGC,53	0	0	0	0	0	0	0	0	0	0	36	0	0	0	0	0	0	0	0	0	0	0	157.618	0
tRF-54:75-Ala-AGC-1	TCGATCCCCAGTACCTCCACCA	tRF-3b	3019b	tRF-22-WEK6S1852	22	tRNA-Ala-AGC-1-1,GGGGGTATAGCTCAGTGGTAGAGCGCGTGCTTAGCATGCACGAGGTCCTGGGTTCGATCCCCAGTACCTCCACCA,Ala-AGC,53	0	0	2	0	0	0	0	19	0	0	0	0	0	0	5.57742	0	0	0	0	82.8161	0	0	0	0
tRF-54:75-Ala-TGC-1-M2	TCGATCCCCGGCACCTCCACCA	tRF-3b	3020b	tRF-22-WEKSP1852	22	tRNA-Ala-TGC-1-1,GGGGGTGTAGCTCAGTGGTAGAGCGCATGCTTTGCATGTATGAGGTCCCGGGTTCGATCCCCGGCACCTCCACCA,Ala-TGC,53;tRNA-Ala-TGC-6-1,GGGGGTGTAGCTCAGTGGTAGAGCACATGCTTTGCATGTGTGAGGCCCCGGGTTCGATCCCCGGCACCTCCACCA,Ala-TGC,53	0	0	0	0	0	0	0	24	0	0	0	0	0	0	0	0	0	0	0	104.61	0	0	0	0
tRF-54:75-Ala-CGC-1-M4	TCGATCCCCGGCATCTCCACCA	tRF-3b	3021b	tRF-22-WEKSPM852	22	tRNA-Ala-CGC-1-1,GGGGATGTAGCTCAGTGGTAGAGCGCATGCTTCGCATGTATGAGGTCCCGGGTTCGATCCCCGGCATCTCCACCA,Ala-CGC,53;tRNA-Ala-CGC-2-1,GGGGATGTAGCTCAGTGGTAGAGCGCATGCTTCGCATGTATGAGGCCCCGGGTTCGATCCCCGGCATCTCCACCA,Ala-CGC,53;tRNA-Ala-TGC-2-1,GGGGATGTAGCTCAGTGGTAGAGCGCATGCTTTGCATGTATGAGGTCCCGGGTTCGATCCCCGGCATCTCCACCA,Ala-TGC,53;tRNA-Ala-TGC-3-1,GGGGATGTAGCTCAGTGGTAGAGCGCATGCTTTGCATGTATGAGGCCCCGGGTTCGATCCCCGGCATCTC…	0	0	0	0	19	1	1	7	2	3	67	0	0	0	0	0	128.113	6.47387	3.1291	30.5112	5.69739	19.4652	293.345	0
tRF-56:77-Ile-AAT-1-M4	TCGATCCCCGTACGGGCCACCA	tRF-3b	3022b	tRF-22-WEKSU8P52	22	tRNA-Ile-AAT-1-1,GGCCGGTTAGCTCAGTTGGTTAGAGCGTGGCGCTAATAACGCCAAGGTCGCGGGTTCGATCCCCGTACGGGCCACCA,Ile-AAT,55;tRNA-Ile-AAT-5-1,GGCCGGTTAGCTCAGTTGGTTAGAGCGTGGTGCTAATAACGCCAAGGTCGCGGGTTCGATCCCCGTACGGGCCACCA,Ile-AAT,55;tRNA-Ile-AAT-7-1,GGCCGGTTAGCTCAGTTGGTCAGAGCGTGGTGCTAATAACGCCAAGGTCGCGGGTTCGATCCCCGTACGGGCCACCA,Ile-AAT,55;tRNA-Ile-AAT-8-1,GGCCGGTTAGCTCAGTCGGCTAGAGCGTGGTGCTAATAACGCCAAGGTCGCGGGTTCGATCCCC…	0	0	24	0	0	1	0	0	17	1	0	0	0	0	66.929	0	0	6.47387	0	0	48.4278	6.48841	0	0
tRF-55:76-Val-CAC-3	TCGATCCCGGGCGGAAACACCA	tRF-3b	-	tRF-22-WEK8Q2B52	22	tRNA-Val-CAC-3-1,GTTTCCGTAGTGTAGCGGTTATCACATTCGCCTCACACGCGAAAGGTCCCCGGTTCGATCCCGGGCGGAAACACCA,Val-CAC,54	3	0	0	16	0	0	0	8	0	48	1	0	11.7377	0	0	64.8177	0	0	0	34.8699	0	311.444	4.37828	0
tRF-54:75-Asp-GTC-2-M2	TCGATTCCCCGACGGGGAGCCA	tRF-3b	3024b	tRF-22-WE8RO86J2	22	tRNA-Asp-GTC-2-1,TCCTCGTTAGTATAGTGGTGAGTATCCCCGCCTGTCACGCGGGAGACCGGGGTTCGATTCCCCGACGGGGAGCCA,Asp-GTC,53;tRNA-Asp-GTC-3-1,TCCTCGTTAGTATAGTGGTGAGTGTCCCCGTCTGTCACGCGGGAGACCGGGGTTCGATTCCCCGACGGGGAGCCA,Asp-GTC,53	0	4	0	0	0	0	0	0	5	0	31	0	0	6.75993	0	0	0	0	0	0	14.2435	0	135.727	0
tRF-54:75-Gly-TCC-1-M3	TCGATTCCCGGCCAACGCACCA	tRF-3b	3026b	tRF-22-WE8SPOL52	22	tRNA-Gly-TCC-1-1,GCGTTGGTGGTATAGTGGTTAGCATAGCTGCCTTCCAAGCAGTTGACCCGGGTTCGATTCCCGGCCAACGCACCA,Gly-TCC,53;tRNA-Gly-TCC-2-1,GCGTTGGTGGTATAGTGGTGAGCATAGCTGCCTTCCAAGCAGTTGACCCGGGTTCGATTCCCGGCCAACGCACCA,Gly-TCC,53;tRNA-Gly-TCC-3-1,GCGTTGGTGGTATAGTGGTAAGCATAGCTGCCTTCCAAGCAGTTGACCCGGGTTCGATTCCCGGCCAACGCACCA,Gly-TCC,53	3	0	10	0	0	0	0	0	0	0	1	0	11.7377	0	27.8871	0	0	0	0	0	0	0	4.37828	0
tRF-53:74-Gly-GCC-2	TCGATTCCCGGCCAATGCACCA	tRF-3b	3027b	tRF-22-WE8SPOX52	22	tRNA-Gly-GCC-2-1,GCATTGGTGGTTCAGTGGTAGAATTCTCGCCTGCCACGCGGGAGGCCCGGGTTCGATTCCCGGCCAATGCACCA,Gly-GCC,52	8	16	20	1	1	5	29	32	0	0	32	12	31.3005	27.0397	55.7742	4.05111	6.74277	32.3694	90.7438	139.48	0	0	140.105	23.4505
tRF-53:74-Gly-CCC-2	TCGATTCCCGGGCGGCGCACCA	tRF-3b	-	tRF-22-WE8S68L52	22	tRNA-Gly-CCC-2-1,GCGCCGCTGGTGTAGTGGTATCATGCAAGATTCCCATTCTTGCGACCCGGGTTCGATTCCCGGGCGGCGCACCA,Gly-CCC,52	0	3	0	12	0	1	0	1	19	0	0	0	0	5.06995	0	48.6133	0	6.47387	0	4.35874	54.1252	0	0	0
tRF-55:76-Tyr-GTA-2-M2	TCGATTCCGGCTCGAAGGACCA	tRF-3b	3030b	tRF-22-WE884U1D2	22	tRNA-Tyr-GTA-2-1,CCTTCGATAGCTCAGTTGGTAGAGCGGAGGACTGTAGATCCTTAGGTCGCTGGTTCGATTCCGGCTCGAAGGACCA,Tyr-GTA,54;tRNA-Tyr-GTA-5-1,CCTTCGATAGCTCAGCTGGTAGAGCGGAGGACTGTAGATCCTTAGGTCGCTGGTTCGATTCCGGCTCGAAGGACCA,Tyr-GTA,54	0	7	32	13	0	14	2	30	19	2	2	44	0	11.8299	89.2387	52.6644	0	90.6342	6.25819	130.762	54.1252	12.9768	8.75657	85.9852
tRF-29:42-Asn-GTT-1-M6	TCGGCTGTTAACCG	tRF-2	-	-	14	tRNA-Asn-GTT-1-1,GTCTCTGTGGCGCAATCGGTTAGCGCGTTCGGCTGTTAACCGAAAGGTTGGTGGTTCGATCCCACCCAGGGACGCCA,Asn-GTT,28;tRNA-Asn-GTT-2-1,GTCTCTGTGGCGCAATCGGTTAGCGCGTTCGGCTGTTAACCGAAAGGTTGGTGGTTCGAGCCCACCCAGGGACGCCA,Asn-GTT,28;tRNA-Asn-GTT-3-1,GTCTCTGTGGCGCAATCGGTTAGCGCATTCGGCTGTTAACCGAAAGGTTGGTGGTTCGAGCCCACCCAGGGACGCCA,Asn-GTT,28;tRNA-Asn-GTT-4-1,GTCTCTGTGGCGCAATCGGTTAGCGCGTTCGGCTGTTAACCGAAAGATTGGTGGTTCGAGCCCA…	0	0	0	0	0	0	8	0	11	0	0	0	0	0	0	0	0	0	25.0328	0	31.3356	0	0	0
tRF-+1:T14-Pro-TGG-3-2	TCGTGGCTACTGTT	tRF-1	-	-	14	pre_tRNA-Pro-TGG-3-2,GAGAAATTCAGAGTGATAGGAAGCACCACTCAGCTACAGTGGCTCGTTGGTCTAGGGGTATGATTCTCGCTTTGGGTGCGAGAGGTCCCGGGTTCAAATCCCGGACGAGCCCTCGTGGCTACTGTTTTTCCACCCCCTTTTGTCAACTACTG,Pro-TGG,112	15	0	0	0	0	1	0	0	0	0	0	0	58.6884	0	0	0	0	6.47387	0	0	0	0	0	0
tRF-+1:T15-Pro-TGG-3-2	TCGTGGCTACTGTTT	tRF-1	-	-	15	pre_tRNA-Pro-TGG-3-2,GAGAAATTCAGAGTGATAGGAAGCACCACTCAGCTACAGTGGCTCGTTGGTCTAGGGGTATGATTCTCGCTTTGGGTGCGAGAGGTCCCGGGTTCAAATCCCGGACGAGCCCTCGTGGCTACTGTTTTTCCACCCCCTTTTGTCAACTACTG,Pro-TGG,112	122	27	101	97	2	151	5	14	50	42	61	0	477.333	45.6295	281.66	392.958	13.4855	977.555	15.6455	61.0224	142.435	272.513	267.075	0
tRF-+1:T16-Pro-TGG-3-2	TCGTGGCTACTGTTTT	tRF-1	-	-	16	pre_tRNA-Pro-TGG-3-2,GAGAAATTCAGAGTGATAGGAAGCACCACTCAGCTACAGTGGCTCGTTGGTCTAGGGGTATGATTCTCGCTTTGGGTGCGAGAGGTCCCGGGTTCAAATCCCGGACGAGCCCTCGTGGCTACTGTTTTTCCACCCCCTTTTGTCAACTACTG,Pro-TGG,112	273	22	207	114	47	80	161	37	84	116	0	19	1068.13	37.1796	577.263	461.826	316.91	517.91	503.785	161.273	239.29	752.655	0	37.13
tRF-+1:T17-Pro-TGG-3-2	TCGTGGCTACTGTTTTT	tRF-1	-	-	17	pre_tRNA-Pro-TGG-3-2,GAGAAATTCAGAGTGATAGGAAGCACCACTCAGCTACAGTGGCTCGTTGGTCTAGGGGTATGATTCTCGCTTTGGGTGCGAGAGGTCCCGGGTTCAAATCCCGGACGAGCCCTCGTGGCTACTGTTTTTCCACCCCCTTTTGTCAACTACTG,Pro-TGG,112	28	2	13	14	0	39	5	36	0	0	0	0	109.552	3.37997	36.2532	56.7155	0	252.481	15.6455	156.915	0	0	0	0
tRF-+1:T18-Pro-TGG-3-2-M1-17:C>T	TCGTGGCTACTGTTTTTT	tRF-1	-	-	18	pre_tRNA-Pro-TGG-3-2,GAGAAATTCAGAGTGATAGGAAGCACCACTCAGCTACAGTGGCTCGTTGGTCTAGGGGTATGATTCTCGCTTTGGGTGCGAGAGGTCCCGGGTTCAAATCCCGGACGAGCCCTCGTGGCTACTGTTTTTCCACCCCCTTTTGTCAACTACTG,Pro-TGG,112	15	0	8	0	0	0	0	0	0	0	0	0	58.6884	0	22.3097	0	0	0	0	0	0	0	0	0
tRF-60:76-Thr-TGT-3-M4	TCTCGCTGGGGCCTCCA	tRF-3a	3007a	tRF-17-WSNKP92	17	tRNA-Thr-TGT-3-1,GGCTCCATAGCTCAGGGGTTAGAGCGCTGGTCTTGTAAACCAGGGGTCGCGAGTTCAATTCTCGCTGGGGCCTCCA,Thr-TGT,59;tRNA-Thr-TGT-4-1,GGCTCCATAGCTCAGGGGTTAGAGCACTGGTCTTGTAAACCAGGGGTCGCGAGTTCAAATCTCGCTGGGGCCTCCA,Thr-TGT,59;tRNA-Thr-TGT-5-1,GGCCCTATAGCTCAGGGGTTAGAGCACTGGTCTTGTAAACCAGGGGTCGCGAGTTCAAATCTCGCTGGGGCCTCCA,Thr-TGT,59;tRNA-Thr-TGT-6-1,GGCTCCATAGCTCAGGGGTTAGAGCACTGGTCTTGTAAACCAGGGTCGCGAGTTCAAATCTCGCTGG…	3	12	64	86	66	22	120	84	74	63	50	112	11.7377	20.2798	178.477	348.395	445.023	142.425	375.492	366.134	210.803	408.77	218.914	218.871
tRF-59:75-Gln-CTG-1-M5	TCTCGGTGGAACCTCCA	tRF-3a	3004a	tRF-17-WS72092	17	tRNA-Gln-CTG-1-1,GGTTCCATGGTGTAATGGTTAGCACTCTGGACTCTGAATCCAGCGATCCGAGTTCAAATCTCGGTGGAACCTCCA,Gln-CTG,58;tRNA-Gln-CTG-2-1,GGTTCCATGGTGTAATGGTTAGCACTCTGGACTCTGAATCCAGCGATCCGAGTTCAAGTCTCGGTGGAACCTCCA,Gln-CTG,58;tRNA-Gln-CTG-3-1,GGTTCCATGGTGTAATGGTGAGCACTCTGGACTCTGAATCCAGCGATCCGAGTTCGAGTCTCGGTGGAACCTCCA,Gln-CTG,58;tRNA-Gln-CTG-4-1,GGTTCCATGGTGTAATGGTAAGCACTCTGGACTCTGAATCCAGCGATCCGAGTTCGAGTCTCGGTGGAAC…	191	153	554	272	448	434	1053	396	321	705	236	212	747.299	258.567	1544.94	1101.9	3020.76	2809.66	3294.94	1726.06	914.431	4574.33	1033.27	414.292
tRF-59:75-Gln-TTG-1-M3	TCTCGGTGGGACCTCCA	tRF-3a	3005a	tRF-17-WS7K092	17	tRNA-Gln-TTG-1-1,GGTCCCATGGTGTAATGGTTAGCACTCTGGACTTTGAATCCAGCGATCCGAGTTCAAATCTCGGTGGGACCTCCA,Gln-TTG,58;tRNA-Gln-TTG-2-1,GGTCCCATGGTGTAATGGTTAGCACTCTGGACTTTGAATCCAGCAATCCGAGTTCGAATCTCGGTGGGACCTCCA,Gln-TTG,58;tRNA-Gln-TTG-3-1,GGCCCCATGGTGTAATGGTTAGCACTCTGGACTTTGAATCCAGCGATCCGAGTTCAAATCTCGGTGGGACCTCCA,Gln-TTG,58	71	45	214	147	126	186	332	224	108	295	222	31	277.792	76.0492	596.784	595.513	849.589	1204.14	1038.86	976.358	307.659	1914.08	971.979	60.5805
tRF-59:75-Gln-CTG-7	TCTCTGTGGAACCTCCA	tRF-3a	-	-	17	tRNA-Gln-CTG-7-1,GGTTCCATGGTGTAATGGTAAGCACTCTGGACTCTGAATCCAGCCATCTGAGTTCGAGTCTCTGTGGAACCTCCA,Gln-CTG,58	1	0	8	0	2	0	5	0	2	1	0	0	3.91256	0	22.3097	0	13.4855	0	15.6455	0	5.69739	6.48841	0	0
tRF-59:75-Gln-TTG-4	TCTTGGTGGGACCTCCA	tRF-3a	-	-	17	tRNA-Gln-TTG-4-1,GGTCCCATGGTGTAATGGTTAGCACTCTGGGCTTTGAATCCAGCAATCCGAGTTCGAATCTTGGTGGGACCTCCA,Gln-TTG,58	0	0	2	0	26	0	9	3	0	2	0	0	0	0	5.57742	0	175.312	0	28.1619	13.0762	0	12.9768	0	0
tiRNA-32:71-chrM.His-GTG-M1-39:C>A	TGAATCTGACAACAGAGGCTTACGACCCCTTATTTACCCA	tiRNA-3	-	-	40	chrM.tRNA11-HisGTG,GTAAATATAGTTTAACCAAAACATCAGATTGTGAATCTGACAACAGAGGCTTACGACCCCTTATTTACCCCA,His-GTG,31	0	0	0	0	0	0	0	0	0	0	6	1	0	0	0	0	0	0	0	0	0	0	26.2697	1.95421
tRF-+1:T17-Glu-TTC-2-2	TGACTGGACCTTTCTTT	tRF-1	-	-	17	pre_tRNA-Glu-TTC-2-2,ATGATTCAATTGGTTTAGAATTCAACGGTTACTTGTCATCTCCCACATGGTCTAGCGGTTAGGATTCCTGGTTTTCACCCAGGCGGCCCGGGTTCGACTCCCGGTGTGGGAATGACTGGACCTTTCTTTTGGAACACAGTGAAACTCGTAAA,Glu-TTC,112	32	0	68	7	3	20	0	14	1	0	0	54	125.202	0	189.632	28.3578	20.2283	129.477	0	61.0224	2.84869	0	0	105.527
tRF-+1:T18-Glu-TTC-2-2	TGACTGGACCTTTCTTTT	tRF-1	-	-	18	pre_tRNA-Glu-TTC-2-2,ATGATTCAATTGGTTTAGAATTCAACGGTTACTTGTCATCTCCCACATGGTCTAGCGGTTAGGATTCCTGGTTTTCACCCAGGCGGCCCGGGTTCGACTCCCGGTGTGGGAATGACTGGACCTTTCTTTTGGAACACAGTGAAACTCGTAAA,Glu-TTC,112	5	0	9	0	0	1	0	2	0	0	0	0	19.5628	0	25.0984	0	0	6.47387	0	8.71748	0	0	0	0
tRF-59:76-Ala-AGC-8	TGCCCGCATCCTCCACCA	tRF-3a	-	tRF-18-XRPM46D2	18	tRNA-Ala-AGC-8-1,GGGGGATTAGCTCAAATGGTAGAGCGCTCGCTTAGCATGCGAGAGGTAGCGGGATCGATGCCCGCATCCTCCACCA,Ala-AGC,58	0	0	8	0	0	0	0	0	0	0	0	0	0	0	22.3097	0	0	0	0	0	0	0	0	0
tRF-59:76-Ala-AGC-11-M2	TGCCCGCATTCTCCACCA	tRF-3a	-	tRF-18-XRPN46D2	18	tRNA-Ala-AGC-11-1,GGGGAATTAGCTCAAATGGTAGAGCGCTCGCTTAGCATGCGAGAGGTAGCGGGATCGATGCCCGCATTCTCCACCA,Ala-AGC,58;tRNA-Ala-AGC-15-1,GGGGAATTAGCTCAAGTGGTAGAGCGCTCGCTTAGCATGCGAGAGGTAGTGGGATCGATGCCCGCATTCTCCACCA,Ala-AGC,58	12	0	0	0	0	0	2	0	0	0	0	0	46.9507	0	0	0	0	0	6.25819	0	0	0	0	0
tRF-+1:T14-Gly-TCC-1	TGCGGTACCACTTT	tRF-1	-	-	14	pre_tRNA-Gly-TCC-1-1,CCACTATTAAGGATATCCGGAGAGGATGCTACCTATCAGGGCGTTGGTGGTATAGTGGTTAGCATAGCTGCCTTCCAAGCAGTTGACCCGGGTTCGATTCCCGGCCAACGCATGCGGTACCACTTTTGCGAGTTTGAAATTTTCATTTTAGT,Gly-TCC,112	2	0	45	10	1	0	0	0	12	135	0	2	7.82512	0	125.492	40.5111	6.74277	0	0	0	34.1843	875.935	0	3.90842
tRF-+1:T15-Gly-TCC-1	TGCGGTACCACTTTT	tRF-1	1041	-	15	pre_tRNA-Gly-TCC-1-1,CCACTATTAAGGATATCCGGAGAGGATGCTACCTATCAGGGCGTTGGTGGTATAGTGGTTAGCATAGCTGCCTTCCAAGCAGTTGACCCGGGTTCGATTCCCGGCCAACGCATGCGGTACCACTTTTGCGAGTTTGAAATTTTCATTTTAGT,Gly-TCC,112	10	1	2	17	0	4	0	12	0	0	0	0	39.1256	1.68998	5.57742	68.8688	0	25.8955	0	52.3049	0	0	0	0
tRF-28:41-Gln-CTG-1-M7	TGGACTCTGAATCC	tRF-2	-	-	14	tRNA-Gln-CTG-1-1,GGTTCCATGGTGTAATGGTTAGCACTCTGGACTCTGAATCCAGCGATCCGAGTTCAAATCTCGGTGGAACCTCCA,Gln-CTG,27;tRNA-Gln-CTG-2-1,GGTTCCATGGTGTAATGGTTAGCACTCTGGACTCTGAATCCAGCGATCCGAGTTCAAGTCTCGGTGGAACCTCCA,Gln-CTG,27;tRNA-Gln-CTG-3-1,GGTTCCATGGTGTAATGGTGAGCACTCTGGACTCTGAATCCAGCGATCCGAGTTCGAGTCTCGGTGGAACCTCCA,Gln-CTG,27;tRNA-Gln-CTG-4-1,GGTTCCATGGTGTAATGGTAAGCACTCTGGACTCTGAATCCAGCGATCCGAGTTCGAGTCTCGGTGGAAC…	10	0	0	9	55	0	1	13	0	0	42	26	39.1256	0	0	36.46	370.852	0	3.1291	56.6636	0	0	183.888	50.8094
tRF-24:37-chrM.Tyr-GTA	TGGACTGTAAATCT	tRF-2	-	-	14	chrM.tRNA18-TyrGTA,GGTAAAATGGCTGAGTGAAGCATTGGACTGTAAATCTAAAGACAGGGGTTAGGCCTCTTTTTACCACCA,Tyr-GTA,23	0	2	0	0	0	0	6	0	0	5	0	0	0	3.37997	0	0	0	0	18.7746	0	0	32.442	0	0
tRF-28:41-Arg-TCT-1-M4	TGGACTTCTAATTC	tRF-2	-	-	14	tRNA-Arg-TCT-1-1,GGCTCCGTGGCGCAATGGATAGCGCATTGGACTTCTAATTCAAAGGTTCCGGGTTCGAGTCCCGGCGGAGTCGCCA,Arg-TCT,27;tRNA-Arg-TCT-2-1,GGCTCTGTGGCGCAATGGATAGCGCATTGGACTTCTAATTCAAAGGTTGTGGGTTCGAATCCCACCAGAGTCGCCA,Arg-TCT,27;tRNA-Arg-TCT-3-1,GGCTCTGTGGCGCAATGGATAGCGCATTGGACTTCTAATTCAAAGGTTGTGGGTTCGAGTCCCACCAGAGTCGCCA,Arg-TCT,27;tRNA-Arg-TCT-5-1,GGCTCTGTGGCGCAATGGATAGCGCATTGGACTTCTAATTCAAAGGTTGCGGGTTCGAGTCCCTCCA…	0	0	0	0	0	0	0	9	0	0	0	0	0	0	0	0	0	0	0	39.2287	0	0	0	0
tRF-+1:T18-Val-TAC-3	TGGTGTGGTCTGTTGTTT	tRF-1	-	-	18	pre_tRNA-Val-TAC-3-1,CATGGCCTCATAGTCTAGCTTTGAAACTCAGCTAGCCTGTGGTTCCATAGTGTAGTGGTTATCACATCTGCTTTACACGCAGAAGGTCCTGGGTTCAAGCCCCAGTGGAACCATGGTGTGGTCTGTTGTTTTCCTGCCTGTAATCCTAGCTCC,Val-TAC,113	4	14	6	2	0	1	0	0	14	1	0	0	15.6502	23.6598	16.7322	8.10222	0	6.47387	0	0	39.8817	6.48841	0	0
tRF-+1:T19-Val-TAC-3	TGGTGTGGTCTGTTGTTTT	tRF-1	-	-	19	pre_tRNA-Val-TAC-3-1,CATGGCCTCATAGTCTAGCTTTGAAACTCAGCTAGCCTGTGGTTCCATAGTGTAGTGGTTATCACATCTGCTTTACACGCAGAAGGTCCTGGGTTCAAGCCCCAGTGGAACCATGGTGTGGTCTGTTGTTTTCCTGCCTGTAATCCTAGCTCC,Val-TAC,113	23	19	23	0	1	17	27	0	1	0	0	0	89.9889	32.1097	64.1403	0	6.74277	110.056	84.4856	0	2.84869	0	0	0
tRF-50:71-chrM.Pro-TGG	TTAAAGACTTTTTCTCTGACCA	tRF-3b	-	tRF-22-YBOZZ7ND2	22	chrM.tRNA15-ProTGG,CAGAGAATAGTTTAAATTAGAATCTTAGCTTTGGGTGCTAATGGTGGAGTTAAAGACTTTTTCTCTGACCA,Pro-TGG,49	19	14	64	10	0	0	99	2	2	2	0	2	74.3387	23.6598	178.477	40.5111	0	0	309.781	8.71748	5.69739	12.9768	0	3.90842
tRF-52:72-chrM.Val-TAC	TTAACTTGACCGCTCTGACCA	tRF-3b	-	tRF-21-YDZDL9X1B	21	chrM.tRNA2-ValTAC,CAGAGTGTAGCTTAACACAAAGCACCCAACTTACACTTAGGAGATTTCAACTTAACTTGACCGCTCTGACCA,Val-TAC,51	6	12	17	27	0	29	11	0	34	1	0	0	23.4754	20.2798	47.408	109.38	0	187.742	34.4201	0	96.8556	6.48841	0	0
tRF-55:76-chrM.Asn-GTT	TTAAGTCCCATTGGTCTAGCCA	tRF-3b	-	-	22	chrM.tRNA20-AsnGTT,TAGATTGAAGCCAGTTGATTAGGGTGCTTAGCTGTTAACTAAGTGTTTGTGGGTTTAAGTCCCATTGGTCTAGCCA,Asn-GTT,54	0	0	3	0	0	0	15	1	0	0	0	0	0	0	8.36612	0	0	0	46.9365	4.35874	0	0	0	0
tRF-+1:T26-Thr-AGT-1-2	TTATTCAATTGAAACAGCGTGATTTT	tRF-1	-	-	26	pre_tRNA-Thr-AGT-1-2,ATTCTTGTAGATGAATTTCAGGAACCTTTATGGCAGCTTCGGCGCCGTGGCTTAGTTGGTTAAAGCGCCTGTCTAGTAAACAGGAGATCCTGGGTTCGAATCCCAGCGGTGCCTTTATTCAATTGAAACAGCGTGATTTTGCGGCTAAATCCAC,Thr-AGT,114	0	0	0	0	0	0	0	0	0	0	38	0	0	0	0	0	0	0	0	0	0	0	166.375	0
tRF-+1:T18-Gln-TTG-2	TTCAAAGGTGAACGTTTT	tRF-1	-	-	18	pre_tRNA-Gln-TTG-2-1,TTTAACCACGACTATACTTACCTACTGTACCCTTGTGGTTGGTCCCATGGTGTAATGGTTAGCACTCTGGACTTTGAATCCAGCAATCCGAGTTCGAATCTCGGTGGGACCTTTCAAAGGTGAACGTTTTACAGTTCCTGGCTTGGCCTCTG,Gln-TTG,112	4	0	10	0	0	22	0	0	1	0	0	0	15.6502	0	27.8871	0	0	142.425	0	0	2.84869	0	0	0
tRF-72:90-SeC-TCA-1	TTCCACCTTTCGGGCGCCA	tRF-3b	-	-	19	tRNA-SeC-TCA-1-1,GCCCGGATGATCCTCAGTGGTCTGGGGTGCAGGCTTCAAACCTGTAGCTGTCTAGCGACAGAGTGGTTCAATTCCACCTTTCGGGCGCCA,SeC-TCA,71	0	0	0	0	0	0	0	0	0	4	0	0	0	0	0	0	0	0	0	0	0	25.9536	0	0
tRF-59:76-Tyr-GTA-4	TTCCAGCTCGAAGGACCA	tRF-3a	-	tRF-18-Y6QSD2D2	18	tRNA-Tyr-GTA-4-1,CCTTCGATAGCTCAGCTGGTAGAGCGGAGGACTGTAGATCCTTAGGTCGCTGGTTCGATTCCAGCTCGAAGGACCA,Tyr-GTA,58	4	0	0	0	2	2	3	0	15	0	0	0	15.6502	0	0	0	13.4855	12.9477	9.38729	0	42.7304	0	0	0
tRF-58:75-Gly-TCC-1-M3	TTCCCGGCCAACGCACCA	tRF-3a	3026a	tRF-18-YR66EFD2	18	tRNA-Gly-TCC-1-1,GCGTTGGTGGTATAGTGGTTAGCATAGCTGCCTTCCAAGCAGTTGACCCGGGTTCGATTCCCGGCCAACGCACCA,Gly-TCC,57;tRNA-Gly-TCC-2-1,GCGTTGGTGGTATAGTGGTGAGCATAGCTGCCTTCCAAGCAGTTGACCCGGGTTCGATTCCCGGCCAACGCACCA,Gly-TCC,57;tRNA-Gly-TCC-3-1,GCGTTGGTGGTATAGTGGTAAGCATAGCTGCCTTCCAAGCAGTTGACCCGGGTTCGATTCCCGGCCAACGCACCA,Gly-TCC,57	0	0	0	1	0	19	0	14	0	0	2	0	0	0	0	4.05111	0	123.004	0	61.0224	0	0	8.75657	0
tRF-57:74-Gly-CCC-1-M2	TTCCCGGCCAATGCACCA	tRF-3a	-	tRF-18-YR66IFD2	18	tRNA-Gly-CCC-1-1,GCATTGGTGGTTCAGTGGTAGAATTCTCGCCTCCCACGCGGGAGACCCGGGTTCAATTCCCGGCCAATGCACCA,Gly-CCC,56;tRNA-Gly-GCC-2-1,GCATTGGTGGTTCAGTGGTAGAATTCTCGCCTGCCACGCGGGAGGCCCGGGTTCGATTCCCGGCCAATGCACCA,Gly-GCC,56	12	15	26	4	0	26	2	40	1	0	60	2	46.9507	25.3497	72.5064	16.2044	0	168.321	6.25819	174.35	2.84869	0	262.697	3.90842
tRF-57:74-Gly-CCC-2	TTCCCGGGCGGCGCACCA	tRF-3a	-	tRF-18-YRRHQFD2	18	tRNA-Gly-CCC-2-1,GCGCCGCTGGTGTAGTGGTATCATGCAAGATTCCCATTCTTGCGACCCGGGTTCGATTCCCGGGCGGCGCACCA,Gly-CCC,56	0	3	4	0	0	1	0	13	0	1	0	3	0	5.06995	11.1548	0	0	6.47387	0	56.6636	0	6.48841	0	5.86263
tRF-59:76-Tyr-GTA-2-M3	TTCCGGCTCGAAGGACCA	tRF-3a	3030a	tRF-18-YSQSD2D2	18	tRNA-Tyr-GTA-2-1,CCTTCGATAGCTCAGTTGGTAGAGCGGAGGACTGTAGATCCTTAGGTCGCTGGTTCGATTCCGGCTCGAAGGACCA,Tyr-GTA,58;tRNA-Tyr-GTA-5-1,CCTTCGATAGCTCAGCTGGTAGAGCGGAGGACTGTAGATCCTTAGGTCGCTGGTTCGATTCCGGCTCGAAGGACCA,Tyr-GTA,58;tRNA-Tyr-GTA-7-1,CCTTCGATAGCTCAGCTGGTAGAGCGGAGGACTGTAGATCCTTAGGTCGCTGGTTCAATTCCGGCTCGAAGGACCA,Tyr-GTA,58	92	112	207	180	233	262	745	232	234	214	174	156	359.956	189.278	577.263	729.2	1571.07	1696.16	2331.18	1011.23	666.594	1388.52	761.821	304.857
tRF-+1:T21-Arg-ACG-1	TTCGACTTTAGTGGAAACTTT	tRF-1	-	-	21	pre_tRNA-Arg-ACG-1-1,TTTTTTTCTATAGGTATAACGCCTGTCTTCGTTCGTCAGAGGGCCAGTGGCGCAATGGATAACGCGTCTGACTACGGATCAGAAGATTCCAGGTTCGACTCCTGGCTGGCTCGTTCGACTTTAGTGGAAACTTTGAGGTTTACATAAATGCCC,Arg-ACG,113	134	18	117	52	10	116	87	66	103	1	0	1	524.283	30.4197	326.279	210.658	67.4277	750.969	272.231	287.677	293.416	6.48841	0	1.95421
tRF-53:72-Ala-CGC-1-M4	TTCGATCCCCGGCATCTCCA	tRF-3b	-	-	20	tRNA-Ala-CGC-1-1,GGGGATGTAGCTCAGTGGTAGAGCGCATGCTTCGCATGTATGAGGTCCCGGGTTCGATCCCCGGCATCTCCACCA,Ala-CGC,52;tRNA-Ala-CGC-2-1,GGGGATGTAGCTCAGTGGTAGAGCGCATGCTTCGCATGTATGAGGCCCCGGGTTCGATCCCCGGCATCTCCACCA,Ala-CGC,52;tRNA-Ala-TGC-2-1,GGGGATGTAGCTCAGTGGTAGAGCGCATGCTTTGCATGTATGAGGTCCCGGGTTCGATCCCCGGCATCTCCACCA,Ala-TGC,52;tRNA-Ala-TGC-3-1,GGGGATGTAGCTCAGTGGTAGAGCGCATGCTTTGCATGTATGAGGCCCCGGGTTCGATCCCCGGCATCTC…	0	0	0	0	0	0	0	15	0	0	0	0	0	0	0	0	0	0	0	65.3811	0	0	0	0
tRF-59:76-Thr-TGT-3	TTCTCGCTGGGGCCTCCA	tRF-3a	-	tRF-18-Y9Q867D2	18	tRNA-Thr-TGT-3-1,GGCTCCATAGCTCAGGGGTTAGAGCGCTGGTCTTGTAAACCAGGGGTCGCGAGTTCAATTCTCGCTGGGGCCTCCA,Thr-TGT,58	0	0	6	8	3	0	2	1	1	2	0	0	0	0	16.7322	32.4089	20.2283	0	6.25819	4.35874	2.84869	12.9768	0	0
tRF-+1:T14-Ser-GCT-4	TTTCTGGAGGTTTT	tRF-1	-	-	14	pre_tRNA-Ser-GCT-4-1,TGTGCGGAGGAAGAAAATGACTTTGCCACGCTTAGCATGTGACGAGGTGGCCGAGTGGTTAAGGCGATGGACTGCTAATCCATTGTGCTCTGCACGCGTGGGTTCGAATCCCATCCTCGTCGTTTCTGGAGGTTTTTATTTAACCCTCTGAAAGGATGGGTC,Ser-GCT,122	13	0	0	0	31	37	0	2	0	0	0	0	50.8633	0	0	0	209.026	239.533	0	8.71748	0	0	0	0
tRF-+1:T15-Ser-GCT-4	TTTCTGGAGGTTTTT	tRF-1	-	-	15	pre_tRNA-Ser-GCT-4-1,TGTGCGGAGGAAGAAAATGACTTTGCCACGCTTAGCATGTGACGAGGTGGCCGAGTGGTTAAGGCGATGGACTGCTAATCCATTGTGCTCTGCACGCGTGGGTTCGAATCCCATCCTCGTCGTTTCTGGAGGTTTTTATTTAACCCTCTGAAAGGATGGGTC,Ser-GCT,122	6	0	29	0	0	0	11	0	0	0	56	0	23.4754	0	80.8725	0	0	0	34.4201	0	0	0	245.184	0
tRF-53:69-chrM.Thr-TGT	TTTTTCCAAGGACACCA	tRF-3a	-	tRF-17-ZZK0O52	17	chrM.tRNA14-ThrTGT,GTCCTTGTAGTATAAACTAATACACCAGTCTTGTAAACCGGAGACGAAAACCTTTTTCCAAGGACACCA,Thr-TGT,52	2	0	0	0	0	0	50	9	0	29	0	0	7.82512	0	0	0	0	0	156.455	39.2287	0	188.164	0	0
